# Supplementary material for: Transcriptome analysis of genes involved in defense against alkaline stress in roots of wild jujube (Ziziphus acidojujuba)
Source: PLoS One. 2017 Oct 4;12(10):e0185732. doi: 10.1371/journal.pone.0185732 (PMC5627934; doi:10.1371/journal.pone.0185732)
Supplement: S3 Table — (XLSX) [file pone.0185732.s003.xlsx]

## Sheet: 1 h vs. 12 h
Gene ID	Gene name	Description	GO_id	GO_term	KO_ID	KO_Description	kegg_id	kegg_term	locus	g2 (1 h)	g3 (12 h)	log2(FC)	P value	Q value	UPDOWN
107403281	LOC107403281	MLP-like protein 34	GO:0005623|GO:0050896|GO:0006950|GO:0005622|GO:0009607|GO:0043231|GO:0006952|GO:0005737|GO:0009536|GO:0009507	cell|response to stimulus|response to stress|intracellular|response to biotic stimulus|intracellular membrane-bounded organelle|defense response|cytoplasm|plastid|chloroplast	-	-	-	-	NW_015453591.1:62164-63588	209.546	9.37516	-4.48228	4.2455e-24	5.56605e-21	DOWN
107403286	LOC107403286	myb-related protein Zm38-like	GO:0005623|GO:0050896|GO:0008152|GO:0003700|GO:0006950|GO:0005622|GO:0009892|GO:0044237|GO:0009058|GO:0006807|GO:0044238|GO:0009725|GO:0003682|GO:0043231|GO:0044281|GO:0006970|GO:0003676|GO:0006139|GO:0006725|GO:0009611|GO:0019748|GO:0009698|GO:0009737|GO:0019438|GO:0010467|GO:0005634|GO:0003677|GO:0009699|GO:0044550|GO:0010468|GO:0051252|GO:0009751|GO:0009651|GO:0016070|GO:0032774|GO:0019752|GO:…	cell|response to stimulus|metabolic process|transcription factor activity, sequence-specific DNA binding|response to stress|intracellular|negative regulation of metabolic process|cellular metabolic process|biosynthetic process|nitrogen compound metabolic process|primary metabolic process|response to hormone|chromatin binding|intracellular membrane-bounded organelle|small molecule metabolic proces…	-	-	-	-	chr1:38033774-38035285	9.92385	0.344298	-4.84917	2.81021e-10	3.07026e-08	DOWN
107403306	LOC107403306	uncharacterized LOC107403306	GO:0051179|GO:0005576|GO:0008289|GO:0006810|GO:0071702|GO:0006869	localization|extracellular region|lipid binding|transport|organic substance transport|lipid transport	-	-	-	-	NW_015453593.1:94069-96040	15.4463	64.6772	2.066	0.000479498	0.00751368	UP
107403322	LOC107403322	cytochrome P450 71D11-like	GO:0005623|GO:0008152|GO:0003824|GO:0016491|GO:0005622|GO:0043231|GO:0055114|GO:0004497|GO:0016705|GO:0016709|GO:0018675	cell|metabolic process|catalytic activity|oxidoreductase activity|intracellular|intracellular membrane-bounded organelle|oxidation-reduction process|monooxygenase activity|oxidoreductase activity, acting on paired donors, with incorporation or reduction of molecular oxygen|oxidoreductase activity, acting on paired donors, with incorporation or reduction of molecular oxygen, NAD(P)H as one donor, …	-	-	ko01100|ko01110|ko01120|ko00627|ko00945|ko00903|ko00363|ko00624	Metabolic pathways|Biosynthesis of secondary metabolites|Microbial metabolism in diverse environments|Aminobenzoate degradation|Stilbenoid, diarylheptanoid and gingerol biosynthesis|Limonene and pinene degradation|Bisphenol degradation|Polycyclic aromatic hydrocarbon degradation	NW_015453596.1:44861-46992	148.231	17.102	-3.11562	2.75109e-07	1.33822e-05	DOWN
107403346	LOC107403346	cytochrome P450 714C2-like	-	-	-	-	-	-	NW_015453600.1:118260-121318	5.63239	1.11519	-2.33646	0.000727524	0.0104596	DOWN
107403360	LOC107403360	blue copper protein-like	GO:0051179|GO:0016020|GO:0005623|GO:0009055|GO:0050896|GO:0008152|GO:0031224|GO:0006950|GO:0005622|GO:0071944|GO:0009607|GO:0051707|GO:0005886|GO:0009620|GO:0043231|GO:0006952|GO:0006810|GO:0006979|GO:0043169|GO:0005737|GO:0046658|GO:0009611|GO:0055114|GO:0031225|GO:0009314|GO:0031226|GO:0006811|GO:0005773|GO:0009416|GO:0046872|GO:0050832|GO:0006812|GO:0009642|GO:0046914|GO:0030001|GO:0009646|GO:…	localization|membrane|cell|electron carrier activity|response to stimulus|metabolic process|intrinsic component of membrane|response to stress|intracellular|cell periphery|response to biotic stimulus|response to other organism|plasma membrane|response to fungus|intracellular membrane-bounded organelle|defense response|transport|response to oxidative stress|cation binding|cytoplasm|anchored compon…	-	-	-	-	NW_015453603.1:128878-130614	33.9481	163.011	2.26357	4.81098e-05	0.00111589	UP
107403362	LOC107403362	stellacyanin-like	GO:0051179|GO:0016020|GO:0005623|GO:0009055|GO:0050896|GO:0008152|GO:0031224|GO:0006950|GO:0005622|GO:0071944|GO:0009607|GO:0051707|GO:0005886|GO:0009620|GO:0043231|GO:0006952|GO:0006810|GO:0006979|GO:0043169|GO:0005737|GO:0046658|GO:0009611|GO:0055114|GO:0031225|GO:0009314|GO:0031226|GO:0006811|GO:0005773|GO:0009416|GO:0046872|GO:0050832|GO:0006812|GO:0009642|GO:0046914|GO:0030001|GO:0009646|GO:…	localization|membrane|cell|electron carrier activity|response to stimulus|metabolic process|intrinsic component of membrane|response to stress|intracellular|cell periphery|response to biotic stimulus|response to other organism|plasma membrane|response to fungus|intracellular membrane-bounded organelle|defense response|transport|response to oxidative stress|cation binding|cytoplasm|anchored compon…	-	-	-	-	NW_015453603.1:17107-18338	3.08763	19.0107	2.62224	0.00167696	0.0201999	UP
107403371	LOC107403371	2-hydroxy-6-oxononadienedioate/2-hydroxy-6-oxononatrienedioate hydrolase-like	GO:0008152|GO:0003824|GO:0016787	metabolic process|catalytic activity|hydrolase activity	-	-	-	-	NW_015453605.1:93309-96319	1.21094	15.5198	3.67991	3.54014e-09	2.85827e-07	UP
107403431	LOC107403431	AT-hook motif nuclear-localized protein 24-like	GO:0005623|GO:0008152|GO:0005622|GO:0044237|GO:0009058|GO:0006807|GO:0044238|GO:0043231|GO:0003676|GO:0006139|GO:0006725|GO:0019438|GO:0010467|GO:0005634|GO:0003677|GO:0010468|GO:0051252|GO:0016070|GO:0032774|GO:0006351|GO:2001141|GO:0006355|GO:1903506	cell|metabolic process|intracellular|cellular metabolic process|biosynthetic process|nitrogen compound metabolic process|primary metabolic process|intracellular membrane-bounded organelle|nucleic acid binding|nucleobase-containing compound metabolic process|cellular aromatic compound metabolic process|aromatic compound biosynthetic process|gene expression|nucleus|DNA binding|regulation of gene ex…	-	-	-	-	NW_015453612.1:36892-38035	31.2196	4.70592	-2.72991	2.18899e-06	8.19962e-05	DOWN
107403432	LOC107403432	protein DETOXIFICATION 56-like	GO:0051179|GO:0016020|GO:0005623|GO:0005215|GO:0050896|GO:0051716|GO:0071944|GO:0022857|GO:0005886|GO:0005515|GO:0015238|GO:0006810|GO:0042493|GO:0070887|GO:0010119|GO:0055085|GO:0010118|GO:1990069|GO:0006855|GO:0015893|GO:0010037|GO:1902456|GO:0071244|GO:0015297	localization|membrane|cell|transporter activity|response to stimulus|cellular response to stimulus|cell periphery|transmembrane transporter activity|plasma membrane|protein binding|drug transmembrane transporter activity|transport|response to drug|cellular response to chemical stimulus|regulation of stomatal movement|transmembrane transport|stomatal movement|stomatal opening|drug transmembrane tr…	-	-	-	-	NW_015453612.1:65658-67428	19.8443	1.66327	-3.57663	6.81413e-07	2.94516e-05	DOWN
107403477	LOC107403477	7-deoxyloganetin glucosyltransferase-like	GO:0003824|GO:0016740|GO:0016757|GO:0008194|GO:0016758|GO:0046527|GO:0035251	catalytic activity|transferase activity|transferase activity, transferring glycosyl groups|UDP-glycosyltransferase activity|transferase activity, transferring hexosyl groups|glucosyltransferase activity|UDP-glucosyltransferase activity	-	-	-	-	NW_015453616.1:63427-65351	2.55492	17.7607	2.79734	1.22401e-07	6.59482e-06	UP
107403483	LOC107403483	RNA-binding protein 38-like	GO:0005623|GO:0005622|GO:0043231|GO:0003676|GO:0000166|GO:0005634|GO:0003723	cell|intracellular|intracellular membrane-bounded organelle|nucleic acid binding|nucleotide binding|nucleus|RNA binding	-	-	-	-	NW_015453616.1:120528-126030	3.82252	0.0960766	-5.31419	5.91372e-07	2.61343e-05	DOWN
107403484	LOC107403484	7-deoxyloganetin glucosyltransferase-like	GO:0003824|GO:0016740|GO:0016757|GO:0008194|GO:0016758|GO:0046527|GO:0035251	catalytic activity|transferase activity|transferase activity, transferring glycosyl groups|UDP-glycosyltransferase activity|transferase activity, transferring hexosyl groups|glucosyltransferase activity|UDP-glucosyltransferase activity	-	-	-	-	NW_015453616.1:10067-12003	7.1836	57.337	2.99669	3.80764e-07	1.77081e-05	UP
107403489	LOC107403489	transcription initiation factor TFIID subunit 15-like	GO:0008152|GO:0003824|GO:0016740|GO:0044237|GO:0043169|GO:0006793|GO:0016772|GO:0016301|GO:0006796|GO:0046872|GO:0016310|GO:0046914|GO:0008270	metabolic process|catalytic activity|transferase activity|cellular metabolic process|cation binding|phosphorus metabolic process|transferase activity, transferring phosphorus-containing groups|kinase activity|phosphate-containing compound metabolic process|metal ion binding|phosphorylation|transition metal ion binding|zinc ion binding	-	-	-	-	NW_015453617.1:21843-22995	0.762846	5.16403	2.75903	0.00191326	0.0223867	UP
107403577	LOC107403577	dnaJ protein homolog	GO:0005623|GO:0005622|GO:0043231|GO:0005634	cell|intracellular|intracellular membrane-bounded organelle|nucleus	-	-	ko04141	Protein processing in endoplasmic reticulum	NW_015453626.1:10696-12700	14.8479	62.6102	2.07614	1.44795e-07	7.60784e-06	UP
107403579	LOC107403579	putative receptor protein kinase ZmPK1	GO:0016020|GO:0005623|GO:0030054|GO:0023052|GO:0004871|GO:0050896|GO:0008152|GO:0003824|GO:0016740|GO:0051716|GO:0044237|GO:0004872|GO:0009506|GO:0071944|GO:0005911|GO:0038023|GO:0044238|GO:0005886|GO:0005515|GO:0009725|GO:0004888|GO:0019899|GO:0007165|GO:0019538|GO:0070887|GO:0006793|GO:0001653|GO:0016772|GO:0007154|GO:0016773|GO:0019199|GO:0016301|GO:0007166|GO:0044267|GO:0006796|GO:0009755|GO:…	membrane|cell|cell junction|signaling|signal transducer activity|response to stimulus|metabolic process|catalytic activity|transferase activity|cellular response to stimulus|cellular metabolic process|receptor activity|plasmodesma|cell periphery|cell-cell junction|signaling receptor activity|primary metabolic process|plasma membrane|protein binding|response to hormone|transmembrane signaling rece…	-	-	-	-	NW_015453626.1:111932-123720	0.0463426	0.994508	4.42357	0.00243388	0.02702	UP
107403585	LOC107403585	E3 ubiquitin-protein ligase PUB23-like	GO:0005623|GO:0050896|GO:0008152|GO:0003824|GO:0016740|GO:0006950|GO:0005622|GO:0044237|GO:0016874|GO:0044238|GO:0045730|GO:0019538|GO:0002679|GO:0006952|GO:0005737|GO:0009415|GO:0009414|GO:0019787|GO:0005829|GO:0004842|GO:0044267|GO:0010200|GO:0006464|GO:0070647|GO:0016567|GO:0051865	cell|response to stimulus|metabolic process|catalytic activity|transferase activity|response to stress|intracellular|cellular metabolic process|ligase activity|primary metabolic process|respiratory burst|protein metabolic process|respiratory burst involved in defense response|defense response|cytoplasm|response to water|response to water deprivation|ubiquitin-like protein transferase activity|cyt…	-	-	-	-	NW_015453626.1:73622-75046	10.9177	0.775804	-3.81483	4.70123e-09	3.69812e-07	DOWN
107403630	LOC107403630	uncharacterized LOC107403630	GO:0016020|GO:0005623|GO:0050896|GO:0006950|GO:0005622|GO:0071944|GO:0005886|GO:0005737|GO:0009415|GO:0009414|GO:0009269	membrane|cell|response to stimulus|response to stress|intracellular|cell periphery|plasma membrane|cytoplasm|response to water|response to water deprivation|response to desiccation	-	-	-	-	NW_015453629.1:108046-109890	0.814897	5.70428	2.80736	0.00010876	0.0021953	UP
107403638	LOC107403638	vicianin hydrolase-like	-	-	-	-	-	-	chr1:3197564-3203326	12.1644	1.36104	-3.15989	0.000133048	0.0026079	DOWN
107403642	LOC107403642	LRR receptor-like serine/threonine-protein kinase GSO1	GO:0032502|GO:0000003|GO:0023052|GO:0050896|GO:0008152|GO:0003824|GO:0003006|GO:0016740|GO:0051716|GO:0044237|GO:0044238|GO:0009791|GO:0007165|GO:0007275|GO:0019538|GO:0006793|GO:0048316|GO:0016772|GO:0009793|GO:0007154|GO:0000166|GO:0016773|GO:0010154|GO:0017076|GO:0009790|GO:0016301|GO:0007166|GO:0044267|GO:0006796|GO:0090558|GO:0005524|GO:0006464|GO:0016310|GO:0004672|GO:0030554|GO:0006468|GO:…	developmental process|reproduction|signaling|response to stimulus|metabolic process|catalytic activity|developmental process involved in reproduction|transferase activity|cellular response to stimulus|cellular metabolic process|primary metabolic process|post-embryonic development|signal transduction|multicellular organism development|protein metabolic process|phosphorus metabolic process|seed dev…	-	-	-	-	NW_015453630.1:36240-40667	7.27709	0.617488	-3.55888	1.45595e-08	1.02258e-06	DOWN
107403644	LOC107403644	beta-glucosidase 12-like	GO:0003824|GO:0016787|GO:0016798|GO:0004553|GO:0033907|GO:0047701|GO:0015926|GO:0004565|GO:0008422|GO:0004338|GO:0080083	catalytic activity|hydrolase activity|hydrolase activity, acting on glycosyl bonds|hydrolase activity, hydrolyzing O-glycosyl compounds|beta-D-fucosidase activity|beta-L-arabinosidase activity|glucosidase activity|beta-galactosidase activity|beta-glucosidase activity|glucan exo-1,3-beta-glucosidase activity|beta-gentiobiose beta-glucosidase activity	-	-	ko01100|ko01110|ko00500|ko00940|ko00460	Metabolic pathways|Biosynthesis of secondary metabolites|Starch and sucrose metabolism|Phenylpropanoid biosynthesis|Cyanoamino acid metabolism	NW_015453630.1:126511-127835	5.20621	0.536774	-3.27785	0.00156266	0.0190452	DOWN
107403645	LOC107403645	uncharacterized LOC107403645	-	-	-	-	ko01100|ko01110|ko00500|ko00940|ko00460	Metabolic pathways|Biosynthesis of secondary metabolites|Starch and sucrose metabolism|Phenylpropanoid biosynthesis|Cyanoamino acid metabolism	NW_015453630.1:108652-109397	26.8775	4.20315	-2.67686	7.98544e-05	0.00169772	DOWN
107403646	LOC107403646	putative leucine-rich repeat receptor-like protein kinase At2g19210	-	-	-	-	-	-	chr1:38364103-38368240	0.105189	0.962772	3.19421	0.00522678	0.0484361	UP
107403651	LOC107403651	uncharacterized LOC107403651	-	-	-	-	-	-	NW_015453631.1:43341-46859	8.39851	2.08424	-2.01061	0.000165754	0.00312144	DOWN
107403655	LOC107403655	probable LRR receptor-like serine/threonine-protein kinase At1g51860	GO:0005576|GO:0003824|GO:0016740|GO:0016772|GO:0016301	extracellular region|catalytic activity|transferase activity|transferase activity, transferring phosphorus-containing groups|kinase activity	-	-	-	-	chr1:38383541-38387853	7.22577	0.352719	-4.35656	1.42674e-09	1.27536e-07	DOWN
107403681	LOC107403681	probable LRR receptor-like serine/threonine-protein kinase At1g05700	GO:0016020|GO:0005623|GO:0008152|GO:0003824|GO:0016740|GO:0044237|GO:0071944|GO:0044238|GO:0005886|GO:0019538|GO:0006793|GO:0016772|GO:0000166|GO:0016773|GO:0017076|GO:0016301|GO:0044267|GO:0006796|GO:0005524|GO:0006464|GO:0016310|GO:0004672|GO:0030554|GO:0006468	membrane|cell|metabolic process|catalytic activity|transferase activity|cellular metabolic process|cell periphery|primary metabolic process|plasma membrane|protein metabolic process|phosphorus metabolic process|transferase activity, transferring phosphorus-containing groups|nucleotide binding|phosphotransferase activity, alcohol group as acceptor|purine nucleotide binding|kinase activity|cellular…	-	-	-	-	chr1:38433268-38437207	2.40106	0.268187	-3.16236	0.0014517	0.017931	DOWN
107403689	LOC107403689	jasmonate O-methyltransferase-like	GO:0005623|GO:0023052|GO:0050896|GO:0008152|GO:0003824|GO:0032259|GO:0016740|GO:0006950|GO:0051716|GO:0005622|GO:0044237|GO:0009058|GO:0044238|GO:0009725|GO:0007165|GO:0043231|GO:0044281|GO:0005737|GO:0070887|GO:0009611|GO:0044255|GO:0006629|GO:0007154|GO:0008168|GO:0006631|GO:0005634|GO:0009753|GO:0009755|GO:0008610|GO:0006633|GO:0009867|GO:0071395|GO:0008757|GO:0031407|GO:0019752|GO:0030795|GO:…	cell|signaling|response to stimulus|metabolic process|catalytic activity|methylation|transferase activity|response to stress|cellular response to stimulus|intracellular|cellular metabolic process|biosynthetic process|primary metabolic process|response to hormone|signal transduction|intracellular membrane-bounded organelle|small molecule metabolic process|cytoplasm|cellular response to chemical st…	-	-	ko01110|ko00592	Biosynthesis of secondary metabolites|alpha-Linolenic acid metabolism	NW_015453634.1:62396-64778	0.495764	6.66741	3.7494	4.11529e-06	0.000141451	UP
107403692	LOC107403692	probable LRR receptor-like serine/threonine-protein kinase At1g05700	GO:0016020|GO:0005623|GO:0023052|GO:0050896|GO:0003824|GO:0016740|GO:0042995|GO:0006950|GO:0051716|GO:0071944|GO:0009607|GO:0051707|GO:0005886|GO:0009725|GO:0009620|GO:0007165|GO:0090406|GO:0006952|GO:0070887|GO:0009968|GO:0016772|GO:0007154|GO:0009966|GO:0000166|GO:0009737|GO:0009788|GO:0017076|GO:0016301|GO:0009755|GO:0009787|GO:0050832|GO:0005524|GO:0009738|GO:0030554|GO:0071215	membrane|cell|signaling|response to stimulus|catalytic activity|transferase activity|cell projection|response to stress|cellular response to stimulus|cell periphery|response to biotic stimulus|response to other organism|plasma membrane|response to hormone|response to fungus|signal transduction|pollen tube|defense response|cellular response to chemical stimulus|negative regulation of signal transd…	-	-	-	-	chr1:38440596-38444783	55.2462	10.9566	-2.33407	0.00351902	0.0359235	DOWN
107403717	LOC107403717	probable LRR receptor-like protein kinase At1g51890	GO:0016020|GO:0005623|GO:0008152|GO:0003824|GO:0016740|GO:0044237|GO:0071944|GO:0044238|GO:0005886|GO:0019538|GO:0006793|GO:0016772|GO:0016301|GO:0044267|GO:0006796|GO:0006464|GO:0016310|GO:0006468	membrane|cell|metabolic process|catalytic activity|transferase activity|cellular metabolic process|cell periphery|primary metabolic process|plasma membrane|protein metabolic process|phosphorus metabolic process|transferase activity, transferring phosphorus-containing groups|kinase activity|cellular protein metabolic process|phosphate-containing compound metabolic process|cellular protein modifica…	-	-	-	-	chr1:38464692-38473977	3.52543	0.0200952	-7.4548	1.90242e-10	2.16435e-08	DOWN
107403720	LOC107403720	monocopper oxidase-like protein SKU5	GO:0032502|GO:0005576|GO:0016020|GO:0005623|GO:0030054|GO:0040007|GO:0008152|GO:0003824|GO:0016491|GO:0031090|GO:0031224|GO:0009653|GO:0005622|GO:0009506|GO:0071944|GO:0005911|GO:0016049|GO:0048589|GO:0005886|GO:0048046|GO:0060560|GO:0098588|GO:0005618|GO:0043231|GO:0009826|GO:0043169|GO:0005737|GO:0046658|GO:0055114|GO:0031225|GO:0048869|GO:0031226|GO:0005774|GO:0009505|GO:0005829|GO:0009932|GO:…	developmental process|extracellular region|membrane|cell|cell junction|growth|metabolic process|catalytic activity|oxidoreductase activity|organelle membrane|intrinsic component of membrane|anatomical structure morphogenesis|intracellular|plasmodesma|cell periphery|cell-cell junction|cell growth|developmental growth|plasma membrane|apoplast|developmental growth involved in morphogenesis|bounding …	-	-	-	-	NW_015453639.1:30451-34789	55.0145	9.23623	-2.57444	1.32059e-09	1.18818e-07	DOWN
107403722	LOC107403722	putative leucine-rich repeat receptor-like serine/threonine-protein kinase At2g19230	-	-	-	-	-	-	chr1:38474910-38479481	5.37502	0.561735	-3.25831	3.1328e-07	1.49743e-05	DOWN
107403729	LOC107403729	myb-related protein 315	GO:0005623|GO:0050896|GO:0008152|GO:0003700|GO:0071554|GO:0005622|GO:0044237|GO:0009058|GO:0006807|GO:0044238|GO:0009725|GO:0042546|GO:0003682|GO:0043231|GO:0003676|GO:0006139|GO:0006725|GO:0071669|GO:2000652|GO:0009832|GO:0019438|GO:0010467|GO:0005634|GO:0003677|GO:0009753|GO:0010468|GO:0010628|GO:0051252|GO:0009751|GO:0016070|GO:0009834|GO:0045893|GO:0032774|GO:0006351|GO:2001141|GO:0006355|GO:…	cell|response to stimulus|metabolic process|transcription factor activity, sequence-specific DNA binding|cell wall organization or biogenesis|intracellular|cellular metabolic process|biosynthetic process|nitrogen compound metabolic process|primary metabolic process|response to hormone|cell wall biogenesis|chromatin binding|intracellular membrane-bounded organelle|nucleic acid binding|nucleobase-c…	-	-	-	-	NW_015453640.1:75088-78442	3.785	23.5764	2.63898	2.93126e-07	1.4109e-05	UP
107403760	LOC107403760	cytochrome P450 714C2-like	-	-	-	-	-	-	NW_015453644.1:52833-56108	3.8796	0.694654	-2.48154	0.000813732	0.0114188	DOWN
107403782	LOC107403782	inorganic pyrophosphatase 1-like	GO:0005623|GO:0050896|GO:0003824|GO:0016787|GO:0006950|GO:0051716|GO:0005622|GO:0042594|GO:0043231|GO:0043169|GO:0016817|GO:0007154|GO:0016818|GO:0005634|GO:0006461|GO:0046872|GO:0009267|GO:0031669|GO:0016036|GO:0016462|GO:0051259|GO:0004427|GO:0051262	cell|response to stimulus|catalytic activity|hydrolase activity|response to stress|cellular response to stimulus|intracellular|response to starvation|intracellular membrane-bounded organelle|cation binding|hydrolase activity, acting on acid anhydrides|cell communication|hydrolase activity, acting on acid anhydrides, in phosphorus-containing anhydrides|nucleus|protein complex assembly|metal ion bi…	-	-	ko01100|ko00750	Metabolic pathways|Vitamin B6 metabolism	chr1:38658766-38660727	166.394	36.1627	-2.20203	1.62784e-09	1.44573e-07	DOWN
107403786	LOC107403786	uncharacterized LOC107403786	-	-	-	-	-	-	NW_015453647.1:23892-25610	7.9004	1.90225	-2.05422	0.000561973	0.00852935	DOWN
107403792	LOC107403792	alcohol dehydrogenase-like 4	GO:0005623|GO:0008152|GO:0003824|GO:0016491|GO:0005622|GO:0016614|GO:0043169|GO:0005737|GO:0055114|GO:0016616|GO:0046872|GO:0004022|GO:0046914|GO:0008270	cell|metabolic process|catalytic activity|oxidoreductase activity|intracellular|oxidoreductase activity, acting on CH-OH group of donors|cation binding|cytoplasm|oxidation-reduction process|oxidoreductase activity, acting on the CH-OH group of donors, NAD or NADP as acceptor|metal ion binding|alcohol dehydrogenase (NAD) activity|transition metal ion binding|zinc ion binding	-	-	ko01100|ko01110|ko01130|ko01120|ko01200|ko00010|ko00350|ko00680|ko00982|ko00980	Metabolic pathways|Biosynthesis of secondary metabolites|Biosynthesis of antibiotics|Microbial metabolism in diverse environments|Carbon metabolism|Glycolysis / Gluconeogenesis|Tyrosine metabolism|Methane metabolism|Drug metabolism - cytochrome P450|Metabolism of xenobiotics by cytochrome P450	NW_015453649.1:87781-89745	7.99177	0.789236	-3.33999	3.66841e-05	0.000881615	DOWN
107403864	LOC107403864	two-component response regulator ORR10-like	GO:0050896|GO:0009725|GO:0009735	response to stimulus|response to hormone|response to cytokinin	-	-	ko04075	Plant hormone signal transduction	NW_015453656.1:31664-32931	40.2471	9.80122	-2.03785	7.57454e-06	0.000236175	DOWN
107403865	LOC107403865	putative disease resistance protein At3g15700	GO:0050896|GO:0006950|GO:0006952|GO:0000166|GO:0017076|GO:0043531|GO:0005524|GO:0030554	response to stimulus|response to stress|defense response|nucleotide binding|purine nucleotide binding|ADP binding|ATP binding|adenyl nucleotide binding	-	-	-	-	NW_015453656.1:65263-67702	3.32571	14.5262	2.12692	1.0391e-05	0.000302416	UP
107403873	LOC107403873	UPF0483 protein AGAP003155-like	GO:0005623|GO:0003824|GO:0016787|GO:0005622|GO:0043231|GO:0005737|GO:0009536|GO:0005777|GO:0009507	cell|catalytic activity|hydrolase activity|intracellular|intracellular membrane-bounded organelle|cytoplasm|plastid|peroxisome|chloroplast	-	-	-	-	NW_015453657.1:98630-100480	3.1549	15.7941	2.32372	9.98929e-05	0.00205243	UP
107403877	LOC107403877	uncharacterized LOC107403877	-	-	-	-	-	-	chr1:38448244-38448712	7.58938	0.257517	-4.88124	0.00173835	0.0207214	DOWN
107403931	LOC107403931	flavin-containing monooxygenase FMO GS-OX-like 4	GO:0005623|GO:0008152|GO:0003824|GO:0016491|GO:0005622|GO:0048037|GO:0043231|GO:0055114|GO:0004497|GO:0050662|GO:0016705|GO:0000166|GO:0050660|GO:0005634|GO:0050661|GO:0016709|GO:0004499	cell|metabolic process|catalytic activity|oxidoreductase activity|intracellular|cofactor binding|intracellular membrane-bounded organelle|oxidation-reduction process|monooxygenase activity|coenzyme binding|oxidoreductase activity, acting on paired donors, with incorporation or reduction of molecular oxygen|nucleotide binding|flavin adenine dinucleotide binding|nucleus|NADP binding|oxidoreductase …	-	-	-	-	NW_015453669.1:23281-26395	1.10056	5.73569	2.38173	0.00063896	0.00942252	UP
107403941	LOC107403941	E3 ubiquitin-protein ligase PUB23-like	GO:0005623|GO:0050896|GO:0008152|GO:0003824|GO:0016740|GO:0006950|GO:0005622|GO:0044237|GO:0016874|GO:0044238|GO:0045730|GO:0019538|GO:0002679|GO:0006952|GO:0005737|GO:0009415|GO:0009414|GO:0019787|GO:0005829|GO:0004842|GO:0044267|GO:0010200|GO:0006464|GO:0070647|GO:0016567|GO:0051865	cell|response to stimulus|metabolic process|catalytic activity|transferase activity|response to stress|intracellular|cellular metabolic process|ligase activity|primary metabolic process|respiratory burst|protein metabolic process|respiratory burst involved in defense response|defense response|cytoplasm|response to water|response to water deprivation|ubiquitin-like protein transferase activity|cyt…	-	-	-	-	NW_015453671.1:22879-24304	10.0332	0.678374	-3.88655	2.73541e-09	2.2616e-07	DOWN
107403986	LOC107403986	metallothiol transferase FosB 1-like	GO:0005623|GO:0008152|GO:0003824|GO:0005622|GO:0044238|GO:0016829|GO:0016846|GO:0005737|GO:0005975|GO:0004462	cell|metabolic process|catalytic activity|intracellular|primary metabolic process|lyase activity|carbon-sulfur lyase activity|cytoplasm|carbohydrate metabolic process|lactoylglutathione lyase activity	-	-	-	-	NW_015453676.1:25941-27225	8.20784	37.3643	2.18659	1.68945e-05	0.000459447	UP
107404036	LOC107404036	lignin-forming anionic peroxidase-like	GO:0005576|GO:0016209|GO:0050896|GO:0008152|GO:0003824|GO:0016491|GO:0004601|GO:0006950|GO:0051716|GO:0070482|GO:0001666|GO:0046906|GO:0006979|GO:0043169|GO:0070887|GO:0055114|GO:0046872|GO:0071456|GO:0020037	extracellular region|antioxidant activity|response to stimulus|metabolic process|catalytic activity|oxidoreductase activity|peroxidase activity|response to stress|cellular response to stimulus|response to oxygen levels|response to hypoxia|tetrapyrrole binding|response to oxidative stress|cation binding|cellular response to chemical stimulus|oxidation-reduction process|metal ion binding|cellular r…	-	-	ko01100|ko01110|ko00940	Metabolic pathways|Biosynthesis of secondary metabolites|Phenylpropanoid biosynthesis	NW_015453683.1:3837-27721	1.47898	0.0583737	-4.66315	0.001047	0.0139256	DOWN
107404056	LOC107404056	ankyrin repeat-containing protein At3g12360-like	-	-	-	-	-	-	NW_015453687.1:8084-10360	0.773107	5.95997	2.94657	0.00198804	0.0229882	UP
107404109	LOC107404109	phosphate transporter PHO1	GO:0051179|GO:0016020|GO:0005623|GO:0005215|GO:0050896|GO:0031224|GO:0006950|GO:0051716|GO:0005622|GO:0071944|GO:0022857|GO:0012505|GO:0005886|GO:0042594|GO:0043231|GO:0016021|GO:0006810|GO:0005737|GO:0022891|GO:0007154|GO:0005794|GO:0006811|GO:0015075|GO:0009267|GO:0031669|GO:0005802|GO:0016036|GO:0008509|GO:0006820|GO:0015103|GO:0006817|GO:0015114	localization|membrane|cell|transporter activity|response to stimulus|intrinsic component of membrane|response to stress|cellular response to stimulus|intracellular|cell periphery|transmembrane transporter activity|endomembrane system|plasma membrane|response to starvation|intracellular membrane-bounded organelle|integral component of membrane|transport|cytoplasm|substrate-specific transmembrane t…	-	-	-	-	NW_015453692.1:90713-100788	26.1768	6.38968	-2.03447	0.00339827	0.0350811	DOWN
107404111	LOC107404111	kinesin-like protein KIF22	GO:0005623|GO:0003824|GO:0016787|GO:0005622|GO:0043234|GO:0005737|GO:0005875|GO:0016817|GO:0005874|GO:0007017|GO:0000166|GO:0016818|GO:0017076|GO:0009524|GO:0005856|GO:0005871|GO:0007018|GO:0005524|GO:0015630|GO:0016462|GO:0030554|GO:0017111|GO:0003774|GO:0003777	cell|catalytic activity|hydrolase activity|intracellular|protein complex|cytoplasm|microtubule associated complex|hydrolase activity, acting on acid anhydrides|microtubule|microtubule-based process|nucleotide binding|hydrolase activity, acting on acid anhydrides, in phosphorus-containing anhydrides|purine nucleotide binding|phragmoplast|cytoskeleton|kinesin complex|microtubule-based movement|ATP …	-	-	-	-	NW_015453692.1:43530-47551	10.2564	2.54184	-2.01258	1.31918e-05	0.000372181	DOWN
107404147	LOC107404147	5'-3' exoribonuclease 3-like	GO:0005623|GO:0008152|GO:0003824|GO:0016787|GO:0005622|GO:0044237|GO:0006807|GO:0044238|GO:0043231|GO:0043169|GO:0003676|GO:0006139|GO:0006725|GO:0016788|GO:0019439|GO:0010467|GO:0005634|GO:0004518|GO:0046872|GO:0016070|GO:0090305|GO:0006396|GO:0006401|GO:0016071|GO:0004527|GO:0090501|GO:0004540|GO:0046914|GO:0004532|GO:0006397|GO:0010586|GO:0008409|GO:0008270|GO:0090503|GO:0004534|GO:0010587	cell|metabolic process|catalytic activity|hydrolase activity|intracellular|cellular metabolic process|nitrogen compound metabolic process|primary metabolic process|intracellular membrane-bounded organelle|cation binding|nucleic acid binding|nucleobase-containing compound metabolic process|cellular aromatic compound metabolic process|hydrolase activity, acting on ester bonds|aromatic compound cata…	-	-	ko03008|ko03018	Ribosome biogenesis in eukaryotes|RNA degradation	NW_015453699.1:9003-22637	0.663277	2.69105	2.02048	0.00109835	0.0143862	UP
107404161	LOC107404161	protein indeterminate-domain 9-like	GO:0005623|GO:0008152|GO:0003700|GO:0005622|GO:0044237|GO:0009058|GO:0006807|GO:0044238|GO:0043231|GO:0043169|GO:0003676|GO:0006139|GO:0006725|GO:0019438|GO:0010467|GO:0005634|GO:0003677|GO:0046872|GO:0010468|GO:0051252|GO:0016070|GO:0032774|GO:0006351|GO:2001141|GO:0006355|GO:0046914|GO:1903506|GO:0008270	cell|metabolic process|transcription factor activity, sequence-specific DNA binding|intracellular|cellular metabolic process|biosynthetic process|nitrogen compound metabolic process|primary metabolic process|intracellular membrane-bounded organelle|cation binding|nucleic acid binding|nucleobase-containing compound metabolic process|cellular aromatic compound metabolic process|aromatic compound bi…	-	-	-	-	NW_015453701.1:58984-61664	4.01243	0.624175	-2.68445	6.99314e-05	0.00152927	DOWN
107404162	LOC107404162	uncharacterized LOC107404162	GO:0005623|GO:0005622|GO:0043231|GO:0005737|GO:0005739	cell|intracellular|intracellular membrane-bounded organelle|cytoplasm|mitochondrion	-	-	-	-	NW_015453702.1:42136-45345	0.612607	0.0322585	-4.24721	0.00354541	0.0361795	DOWN
107404181	LOC107404181	putative ankyrin repeat protein RF_0381	-	-	-	-	-	-	NW_015453703.1:5266-7784	2.80338	14.5893	2.37967	1.57072e-05	0.000432952	UP
107404215	LOC107404215	nucleobase-ascorbate transporter 2-like	GO:0051179|GO:0016020|GO:0005215|GO:0031224|GO:0022857|GO:0016021|GO:0006810|GO:0055085	localization|membrane|transporter activity|intrinsic component of membrane|transmembrane transporter activity|integral component of membrane|transport|transmembrane transport	-	-	-	-	NW_015453710.1:37917-41905	6.71753	1.66196	-2.01504	0.00044356	0.00704273	DOWN
107404231	LOC107404231	L-ascorbate oxidase homolog	GO:0005576|GO:0008152|GO:0003824|GO:0016491|GO:0016787|GO:0043169|GO:0016788|GO:0055114|GO:0052689|GO:0046872|GO:0030599|GO:0046914|GO:0005507	extracellular region|metabolic process|catalytic activity|oxidoreductase activity|hydrolase activity|cation binding|hydrolase activity, acting on ester bonds|oxidation-reduction process|carboxylic ester hydrolase activity|metal ion binding|pectinesterase activity|transition metal ion binding|copper ion binding	-	-	-	-	NW_015453713.1:59247-63043	34.7145	0.316262	-6.77827	1.76229e-17	7.0318e-15	DOWN
107404233	LOC107404233	salicylic acid-binding protein 2-like	GO:0023052|GO:0050896|GO:0008152|GO:0003824|GO:0016787|GO:0006950|GO:0051716|GO:0009607|GO:0051707|GO:0006955|GO:0007165|GO:0006952|GO:0016788|GO:0070887|GO:0045087|GO:0007154|GO:0016298|GO:0009814|GO:0052689|GO:0009751|GO:0009863|GO:0009627|GO:0080031|GO:0009862|GO:0071407|GO:0071446	signaling|response to stimulus|metabolic process|catalytic activity|hydrolase activity|response to stress|cellular response to stimulus|response to biotic stimulus|response to other organism|immune response|signal transduction|defense response|hydrolase activity, acting on ester bonds|cellular response to chemical stimulus|innate immune response|cell communication|lipase activity|defense response…	-	-	-	-	NW_015453713.1:5766-7605	11.0767	67.5595	2.60863	9.31984e-10	8.84807e-08	UP
107404235	LOC107404235	salicylic acid-binding protein 2-like	GO:0023052|GO:0050896|GO:0008152|GO:0003824|GO:0016787|GO:0006950|GO:0051716|GO:0009607|GO:0051707|GO:0006955|GO:0007165|GO:0006952|GO:0016788|GO:0070887|GO:0045087|GO:0007154|GO:0016298|GO:0009814|GO:0052689|GO:0009751|GO:0009863|GO:0009627|GO:0080031|GO:0009862|GO:0071407|GO:0071446	signaling|response to stimulus|metabolic process|catalytic activity|hydrolase activity|response to stress|cellular response to stimulus|response to biotic stimulus|response to other organism|immune response|signal transduction|defense response|hydrolase activity, acting on ester bonds|cellular response to chemical stimulus|innate immune response|cell communication|lipase activity|defense response…	-	-	-	-	NW_015453713.1:22009-23247	0.336145	11.0128	5.03396	4.22697e-09	3.37324e-07	UP
107404247	LOC107404247	uncharacterized LOC107404247	GO:0005623|GO:0005622|GO:0043231|GO:0005737|GO:0009526|GO:0005739|GO:0009536|GO:0009507|GO:0009941	cell|intracellular|intracellular membrane-bounded organelle|cytoplasm|plastid envelope|mitochondrion|plastid|chloroplast|chloroplast envelope	-	-	-	-	chr1:38834460-38837348	1.44832	0.2058	-2.81506	0.00500629	0.0468342	DOWN
107404281	LOC107404281	putative disease resistance protein RGA3	GO:0005576|GO:0050896|GO:0006950|GO:0005515|GO:0006952|GO:0000166|GO:0017076|GO:0043531|GO:0005524|GO:0030554	extracellular region|response to stimulus|response to stress|protein binding|defense response|nucleotide binding|purine nucleotide binding|ADP binding|ATP binding|adenyl nucleotide binding	-	-	-	-	NW_015453717.1:45529-46737	3.75775	0.187547	-4.32454	0.000171786	0.00321305	DOWN
107404282	LOC107404282	putative disease resistance protein At3g14460	GO:0005623|GO:0050896|GO:0006950|GO:0005622|GO:0043231|GO:0006952|GO:0000166|GO:0017076|GO:0005634|GO:0043531|GO:0005524|GO:0030554	cell|response to stimulus|response to stress|intracellular|intracellular membrane-bounded organelle|defense response|nucleotide binding|purine nucleotide binding|nucleus|ADP binding|ATP binding|adenyl nucleotide binding	-	-	-	-	NW_015453717.1:47008-48774	5.17325	0.284774	-4.18318	2.69838e-06	9.86612e-05	DOWN
107404287	LOC107404287	pirin-like protein	GO:0005623|GO:0005622|GO:0005515|GO:0043231|GO:0005516|GO:0005634	cell|intracellular|protein binding|intracellular membrane-bounded organelle|calmodulin binding|nucleus	-	-	-	-	NW_015453717.1:73394-76090	10.7978	62.3832	2.53042	2.03932e-07	1.02754e-05	UP
107404305	LOC107404305	uncharacterized LOC107404305	GO:0016020|GO:0005623|GO:0050896|GO:0006950|GO:0005622|GO:0071944|GO:0005886|GO:0005737|GO:0009415|GO:0009414|GO:0009269	membrane|cell|response to stimulus|response to stress|intracellular|cell periphery|plasma membrane|cytoplasm|response to water|response to water deprivation|response to desiccation	-	-	-	-	NW_015453724.1:68452-70228	1.21694	6.41682	2.3986	0.000589994	0.00885216	UP
107404307	LOC107404307	2-hydroxy-6-oxononadienedioate/2-hydroxy-6-oxononatrienedioate hydrolase-like	GO:0008152|GO:0003824|GO:0016787	metabolic process|catalytic activity|hydrolase activity	-	-	-	-	NW_015453724.1:20542-23599	1.81144	20.7009	3.51448	4.87947e-10	5.03152e-08	UP
107404385	LOC107404385	probable LRR receptor-like serine/threonine-protein kinase At1g05700	GO:0016020|GO:0005623|GO:0008152|GO:0003824|GO:0016740|GO:0044237|GO:0071944|GO:0044238|GO:0005886|GO:0019538|GO:0006793|GO:0016772|GO:0000166|GO:0016773|GO:0017076|GO:0016301|GO:0044267|GO:0006796|GO:0005524|GO:0006464|GO:0016310|GO:0004672|GO:0030554|GO:0006468	membrane|cell|metabolic process|catalytic activity|transferase activity|cellular metabolic process|cell periphery|primary metabolic process|plasma membrane|protein metabolic process|phosphorus metabolic process|transferase activity, transferring phosphorus-containing groups|nucleotide binding|phosphotransferase activity, alcohol group as acceptor|purine nucleotide binding|kinase activity|cellular…	-	-	-	-	NW_015453738.1:93643-98703	0.0352475	0.741331	4.39453	0.00158378	0.0192685	UP
107404401	LOC107404401	probable inactive leucine-rich repeat receptor-like protein kinase At3g03770	GO:0016020|GO:0005623|GO:0023052|GO:0050896|GO:0008152|GO:0003824|GO:0016740|GO:0051716|GO:0044237|GO:0071944|GO:0044238|GO:0005886|GO:0007165|GO:0019538|GO:0006793|GO:0016772|GO:0007154|GO:0000166|GO:0016773|GO:0017076|GO:0016301|GO:0007166|GO:0044267|GO:0006796|GO:0005524|GO:0006464|GO:0016310|GO:0004672|GO:0030554|GO:0006468|GO:0004674|GO:0007169	membrane|cell|signaling|response to stimulus|metabolic process|catalytic activity|transferase activity|cellular response to stimulus|cellular metabolic process|cell periphery|primary metabolic process|plasma membrane|signal transduction|protein metabolic process|phosphorus metabolic process|transferase activity, transferring phosphorus-containing groups|cell communication|nucleotide binding|phosp…	-	-	-	-	NW_015453741.1:93164-97319	6.16713	0.580843	-3.40838	5.57471e-09	4.29924e-07	DOWN
107404485	LOC107404485	L-ascorbate oxidase homolog	GO:0005576|GO:0016020|GO:0005623|GO:0030054|GO:0008152|GO:0003824|GO:0016491|GO:0009506|GO:0071944|GO:0005911|GO:0005618|GO:0043169|GO:0055114|GO:0009505|GO:0046872|GO:0046914|GO:0005507	extracellular region|membrane|cell|cell junction|metabolic process|catalytic activity|oxidoreductase activity|plasmodesma|cell periphery|cell-cell junction|cell wall|cation binding|oxidation-reduction process|plant-type cell wall|metal ion binding|transition metal ion binding|copper ion binding	-	-	-	-	NW_015453752.1:320-4097	8.10766	1.08331	-2.90384	1.1278e-05	0.000323444	DOWN
107404503	LOC107404503	uncharacterized LOC107404503	GO:0005623|GO:0005622|GO:0003676|GO:0005737|GO:0003677	cell|intracellular|nucleic acid binding|cytoplasm|DNA binding	-	-	-	-	NW_015453755.1:14373-17756	0.523431	6.94864	3.73066	2.55139e-09	2.1222e-07	UP
107404512	LOC107404512	uncharacterized LOC107404512	GO:0005623|GO:0005622|GO:0003676|GO:0005737|GO:0003677	cell|intracellular|nucleic acid binding|cytoplasm|DNA binding	-	-	-	-	NW_015453755.1:30238-46431	0.238631	2.72028	3.5109	1.05856e-06	4.33693e-05	UP
107404536	LOC107404536	ADP-ribosylation factor GTPase-activating protein AGD1-like	GO:0032502|GO:0051179|GO:0016020|GO:0005623|GO:0050896|GO:0008289|GO:0030234|GO:0009653|GO:0005622|GO:0071944|GO:0012505|GO:0005886|GO:0005515|GO:0009725|GO:0030133|GO:0009887|GO:0043231|GO:0007275|GO:0006810|GO:0007389|GO:0005737|GO:0031982|GO:0005543|GO:0048513|GO:0010016|GO:0008047|GO:0048367|GO:0005794|GO:0030140|GO:0031410|GO:0005096|GO:0005829|GO:0009733|GO:0005798|GO:0048827|GO:0016192|GO:…	developmental process|localization|membrane|cell|response to stimulus|lipid binding|enzyme regulator activity|anatomical structure morphogenesis|intracellular|cell periphery|endomembrane system|plasma membrane|protein binding|response to hormone|transport vesicle|organ morphogenesis|intracellular membrane-bounded organelle|multicellular organism development|transport|pattern specification process…	-	-	ko04144	Endocytosis	NW_015453758.1:35220-54410	0.455294	0.0426286	-3.41691	0.00246731	0.027314	DOWN
107404553	LOC107404553	(-)-isopiperitenol/(-)-carveol dehydrogenase, mitochondrial-like	GO:0008152|GO:0003824|GO:0016491|GO:0044237|GO:0009058|GO:0044238|GO:0016614|GO:0044281|GO:0044255|GO:0006629|GO:0000166|GO:0006720|GO:0016616|GO:0006066|GO:0008610|GO:0008299|GO:0018459|GO:0016114|GO:0018458|GO:0016099|GO:0031525	metabolic process|catalytic activity|oxidoreductase activity|cellular metabolic process|biosynthetic process|primary metabolic process|oxidoreductase activity, acting on CH-OH group of donors|small molecule metabolic process|cellular lipid metabolic process|lipid metabolic process|nucleotide binding|isoprenoid metabolic process|oxidoreductase activity, acting on the CH-OH group of donors, NAD or …	-	-	ko01100|ko00140	Metabolic pathways|Steroid hormone biosynthesis	NW_015453760.1:26572-27240	0.349273	8.9229	4.67509	1.32788e-05	0.000373433	UP
107404557	LOC107404557	uncharacterized LOC107404557	GO:0005623|GO:0008152|GO:0003824|GO:0016740|GO:0071554|GO:0005622|GO:0009058|GO:0012505|GO:0044238|GO:0042546|GO:0043231|GO:0016757|GO:0005737|GO:0005975|GO:0005794|GO:0016051|GO:0016758|GO:0005976|GO:0008378|GO:0000271|GO:0048531|GO:0045488|GO:0045489	cell|metabolic process|catalytic activity|transferase activity|cell wall organization or biogenesis|intracellular|biosynthetic process|endomembrane system|primary metabolic process|cell wall biogenesis|intracellular membrane-bounded organelle|transferase activity, transferring glycosyl groups|cytoplasm|carbohydrate metabolic process|Golgi apparatus|carbohydrate biosynthetic process|transferase ac…	-	-	-	-	NW_015453760.1:33731-35684	3.82106	0.805396	-2.2462	0.000151463	0.00289588	DOWN
107404596	LOC107404596	putative cyclic nucleotide-gated ion channel 15	GO:0051179|GO:0016020|GO:0005623|GO:0005215|GO:0071944|GO:0022857|GO:0005886|GO:0005515|GO:0006810|GO:0022891|GO:0055085|GO:0005516|GO:0000166|GO:0006811|GO:0015075|GO:0030551|GO:0017076|GO:0034220|GO:0030552|GO:0015267|GO:0030553|GO:0006812|GO:0008324|GO:0030554|GO:0098655|GO:0005216|GO:0005261	localization|membrane|cell|transporter activity|cell periphery|transmembrane transporter activity|plasma membrane|protein binding|transport|substrate-specific transmembrane transporter activity|transmembrane transport|calmodulin binding|nucleotide binding|ion transport|ion transmembrane transporter activity|cyclic nucleotide binding|purine nucleotide binding|ion transmembrane transport|cAMP bindi…	-	-	ko04626	Plant-pathogen interaction	NW_015453764.1:12061-17456	0.212676	1.48366	2.80243	0.00351679	0.035914	UP
107404614	LOC107404614	protein NRT1/ PTR FAMILY 1.2-like	GO:0051179|GO:0016020|GO:0005623|GO:0005215|GO:0031224|GO:0071944|GO:0022857|GO:0005886|GO:0016021|GO:0006810|GO:0022891|GO:0055085|GO:0071702|GO:0006811|GO:0015075|GO:0034220|GO:0015833|GO:0008509|GO:0098656|GO:0015706|GO:0006820|GO:0006857|GO:0080055|GO:0015103|GO:0015112|GO:0080054	localization|membrane|cell|transporter activity|intrinsic component of membrane|cell periphery|transmembrane transporter activity|plasma membrane|integral component of membrane|transport|substrate-specific transmembrane transporter activity|transmembrane transport|organic substance transport|ion transport|ion transmembrane transporter activity|ion transmembrane transport|peptide transport|anion t…	-	-	-	-	chr1:39181851-39184532	5.59789	0.296939	-4.23665	2.11497e-06	7.95482e-05	DOWN
107404643	LOC107404643	phospholipase D alpha 1-like	-	-	-	-	-	-	NW_015453772.1:63517-68652	13.0246	0.372402	-5.12823	6.30806e-14	1.37836e-11	DOWN
107404686	LOC107404686	F-box/FBD/LRR-repeat protein At2g04230-like	GO:0005623|GO:0005622|GO:0043231|GO:0005634	cell|intracellular|intracellular membrane-bounded organelle|nucleus	-	-	-	-	chr1:39426203-39428002	6.96907	0.437786	-3.99267	4.79135e-06	0.000160676	DOWN
107404715	LOC107404715	uncharacterized LOC107404715	-	-	-	-	ko00904	Diterpenoid biosynthesis	NW_015453781.1:41007-46008	0.839651	12.0069	3.83794	5.72748e-06	0.000186614	UP
107404781	LOC107404781	zinc finger CCCH domain-containing protein 48-like	GO:0005623|GO:0005622|GO:0043169|GO:0003676|GO:0005737|GO:0003677|GO:0046872	cell|intracellular|cation binding|nucleic acid binding|cytoplasm|DNA binding|metal ion binding	-	-	-	-	NW_015453792.1:40805-42052	0.95713	21.3746	4.48104	3.11462e-11	4.1426e-09	UP
107404788	LOC107404788	cytochrome P450 CYP736A12-like	GO:0016020|GO:0008152|GO:0003824|GO:0016491|GO:0009058|GO:0019748|GO:0004497|GO:0016705|GO:0044550|GO:0016709	membrane|metabolic process|catalytic activity|oxidoreductase activity|biosynthetic process|secondary metabolic process|monooxygenase activity|oxidoreductase activity, acting on paired donors, with incorporation or reduction of molecular oxygen|secondary metabolite biosynthetic process|oxidoreductase activity, acting on paired donors, with incorporation or reduction of molecular oxygen, NAD(P)H as…	-	-	ko01100|ko01110|ko00941|ko00944	Metabolic pathways|Biosynthesis of secondary metabolites|Flavonoid biosynthesis|Flavone and flavonol biosynthesis	NW_015453793.1:38022-41062	2.03926	13.0503	2.67796	4.73019e-06	0.000159598	UP
107404799	LOC107404799	transcription factor MYB108-like	GO:0005623|GO:0050896|GO:0008152|GO:0003700|GO:0006950|GO:0005622|GO:0044237|GO:0009607|GO:0009058|GO:0006807|GO:0051707|GO:0044238|GO:0009725|GO:0003682|GO:0009620|GO:0043231|GO:0006970|GO:0003676|GO:0006139|GO:0006725|GO:0009723|GO:0009737|GO:0019438|GO:0010467|GO:0005634|GO:0003677|GO:0009753|GO:0010468|GO:0051252|GO:0009651|GO:0016070|GO:0032774|GO:0006351|GO:2001141|GO:0006355|GO:1903506	cell|response to stimulus|metabolic process|transcription factor activity, sequence-specific DNA binding|response to stress|intracellular|cellular metabolic process|response to biotic stimulus|biosynthetic process|nitrogen compound metabolic process|response to other organism|primary metabolic process|response to hormone|chromatin binding|response to fungus|intracellular membrane-bounded organell…	-	-	-	-	NW_015453794.1:16330-18434	1.80499	8.44388	2.22591	0.000933868	0.0126532	UP
107404820	LOC107404820	probable LRR receptor-like serine/threonine-protein kinase At1g05700	GO:0016020|GO:0005623|GO:0008152|GO:0003824|GO:0016740|GO:0044237|GO:0071944|GO:0044238|GO:0005886|GO:0019538|GO:0006793|GO:0016772|GO:0000166|GO:0016773|GO:0017076|GO:0016301|GO:0044267|GO:0006796|GO:0005524|GO:0006464|GO:0016310|GO:0004672|GO:0030554|GO:0006468	membrane|cell|metabolic process|catalytic activity|transferase activity|cellular metabolic process|cell periphery|primary metabolic process|plasma membrane|protein metabolic process|phosphorus metabolic process|transferase activity, transferring phosphorus-containing groups|nucleotide binding|phosphotransferase activity, alcohol group as acceptor|purine nucleotide binding|kinase activity|cellular…	-	-	-	-	NW_015453797.1:42004-49580	0.0292243	0.728369	4.63943	0.00020442	0.00371983	UP
107404841	LOC107404841	uncharacterized LOC107404841	-	-	-	-	-	-	NW_015453803.1:19131-22646	4.91923	90.0939	4.19493	9.2384e-11	1.11071e-08	UP
107404848	LOC107404848	subtilisin-like protease SBT1.9	GO:0005623|GO:0003824|GO:0016787|GO:0071944|GO:0005618|GO:0008233|GO:0008236|GO:0004175|GO:0004252	cell|catalytic activity|hydrolase activity|cell periphery|cell wall|peptidase activity|serine-type peptidase activity|endopeptidase activity|serine-type endopeptidase activity	-	-	-	-	NW_015453806.1:21620-24073	4.6037	24.248	2.397	9.3929e-07	3.9148e-05	UP
107404857	LOC107404857	late embryogenesis abundant protein At1g64065-like	GO:0016020|GO:0005623|GO:0071944|GO:0005886	membrane|cell|cell periphery|plasma membrane	-	-	-	-	NW_015453807.1:45219-45767	1.52428	7.9645	2.38546	0.00294023	0.0313033	UP
107404886	LOC107404886	vicianin hydrolase-like	GO:0008152|GO:0003824|GO:0016787|GO:0044238|GO:0016798|GO:0005975|GO:0016052|GO:0004553	metabolic process|catalytic activity|hydrolase activity|primary metabolic process|hydrolase activity, acting on glycosyl bonds|carbohydrate metabolic process|carbohydrate catabolic process|hydrolase activity, hydrolyzing O-glycosyl compounds	-	-	ko01100|ko01110|ko00500|ko00940|ko00460	Metabolic pathways|Biosynthesis of secondary metabolites|Starch and sucrose metabolism|Phenylpropanoid biosynthesis|Cyanoamino acid metabolism	chr1:3190104-3195986	37.7122	6.1742	-2.61071	2.41403e-09	2.03251e-07	DOWN
107404912	LOC107404912	putative calcium-transporting ATPase 13, plasma membrane-type	GO:0051179|GO:0016020|GO:0005623|GO:0005215|GO:0003824|GO:0016787|GO:0031224|GO:0005622|GO:0071944|GO:0022857|GO:0005886|GO:0005515|GO:0043231|GO:0016021|GO:0006810|GO:0022891|GO:0005887|GO:0055085|GO:0016817|GO:0031226|GO:0005516|GO:0006811|GO:0015075|GO:0016818|GO:0034220|GO:0016820|GO:0015399|GO:0042626|GO:0006812|GO:0016462|GO:0008324|GO:0098655|GO:0015662|GO:0017111|GO:0019829|GO:0016887|GO:…	localization|membrane|cell|transporter activity|catalytic activity|hydrolase activity|intrinsic component of membrane|intracellular|cell periphery|transmembrane transporter activity|plasma membrane|protein binding|intracellular membrane-bounded organelle|integral component of membrane|transport|substrate-specific transmembrane transporter activity|integral component of plasma membrane|transmembra…	-	-	-	-	NW_015453818.1:11905-37135	1.4287	10.8378	2.92329	3.27585e-07	1.55142e-05	UP
107404917	LOC107404917	putative calcium-transporting ATPase 13, plasma membrane-type	GO:0051179|GO:0016020|GO:0005623|GO:0005215|GO:0003824|GO:0016787|GO:0031224|GO:0005622|GO:0071944|GO:0022857|GO:0005886|GO:0005515|GO:0043231|GO:0016021|GO:0006810|GO:0022891|GO:0005887|GO:0055085|GO:0016817|GO:0031226|GO:0005516|GO:0006811|GO:0015075|GO:0016818|GO:0034220|GO:0016820|GO:0015399|GO:0042626|GO:0006812|GO:0016462|GO:0008324|GO:0098655|GO:0015662|GO:0017111|GO:0019829|GO:0016887|GO:…	localization|membrane|cell|transporter activity|catalytic activity|hydrolase activity|intrinsic component of membrane|intracellular|cell periphery|transmembrane transporter activity|plasma membrane|protein binding|intracellular membrane-bounded organelle|integral component of membrane|transport|substrate-specific transmembrane transporter activity|integral component of plasma membrane|transmembra…	-	-	-	-	NW_015453818.1:37872-40821	3.3023	19.6323	2.57168	5.08731e-09	3.95661e-07	UP
107404936	LOC107404936	BURP domain-containing protein 3-like	GO:0032502|GO:0005576|GO:0005623|GO:0000003|GO:0003006|GO:0005622|GO:0009791|GO:0043231|GO:0007275|GO:0005737|GO:0048316|GO:0010154|GO:0005773|GO:0000322|GO:0000325|GO:0000326	developmental process|extracellular region|cell|reproduction|developmental process involved in reproduction|intracellular|post-embryonic development|intracellular membrane-bounded organelle|multicellular organism development|cytoplasm|seed development|fruit development|vacuole|storage vacuole|plant-type vacuole|protein storage vacuole	-	-	-	-	NW_015453824.1:22818-26219	61.973	1.80598	-5.10078	1.47004e-20	1.09379e-17	DOWN
107404949	LOC107404949	uncharacterized LOC107404949	GO:0048511|GO:0005623|GO:0005622|GO:0007623|GO:0043231|GO:0005634	rhythmic process|cell|intracellular|circadian rhythm|intracellular membrane-bounded organelle|nucleus	-	-	-	-	NW_015453827.1:32440-33930	55.5046	11.4653	-2.27533	2.44279e-08	1.60131e-06	DOWN
107404955	LOC107404955	wall-associated receptor kinase 2-like	GO:0032502|GO:0016020|GO:0005623|GO:0040007|GO:0050896|GO:0008152|GO:0003824|GO:0016740|GO:0009653|GO:0044237|GO:0071944|GO:0016049|GO:0044238|GO:0048589|GO:0005886|GO:0060560|GO:0019538|GO:0009826|GO:0019725|GO:0006793|GO:0005975|GO:0016772|GO:0048869|GO:0016773|GO:0008361|GO:0006884|GO:0016301|GO:0044267|GO:0006796|GO:0009751|GO:0009311|GO:0000902|GO:0006464|GO:0030104|GO:0016310|GO:0009992|GO:…	developmental process|membrane|cell|growth|response to stimulus|metabolic process|catalytic activity|transferase activity|anatomical structure morphogenesis|cellular metabolic process|cell periphery|cell growth|primary metabolic process|developmental growth|plasma membrane|developmental growth involved in morphogenesis|protein metabolic process|unidimensional cell growth|cellular homeostasis|phos…	-	-	-	-	NW_015453828.1:34899-39323	3.57706	0.0543075	-6.04148	5.59277e-08	3.34013e-06	DOWN
107404990	LOC107404990	reticuline oxidase-like protein	-	-	-	-	-	-	NW_015453835.1:26799-30386	0.130233	1.28212	3.29936	0.00401929	0.039734	UP
107404991	LOC107404991	twinkle homolog protein, chloroplastic/mitochondrial-like	-	-	-	-	-	-	NW_015453835.1:38968-78592	1.99556	18.531	3.21507	8.15097e-06	0.000249624	UP
107404998	LOC107404998	protein SRG1-like	GO:0032502|GO:0005623|GO:0008152|GO:0003824|GO:0016491|GO:0005622|GO:0007275|GO:0043169|GO:0051213|GO:0007568|GO:0005737|GO:0055114|GO:0048513|GO:0016705|GO:0016706|GO:0010260|GO:0046872|GO:0016682	developmental process|cell|metabolic process|catalytic activity|oxidoreductase activity|intracellular|multicellular organism development|cation binding|dioxygenase activity|aging|cytoplasm|oxidation-reduction process|animal organ development|oxidoreductase activity, acting on paired donors, with incorporation or reduction of molecular oxygen|oxidoreductase activity, acting on paired donors, with …	-	-	-	-	NW_015453838.1:53748-56964	5.73612	23.0489	2.00655	0.000518218	0.00798782	UP
107404999	LOC107404999	eukaryotic translation initiation factor 5-like	-	-	-	-	-	-	NW_015453838.1:65193-66438	0.448691	4.83921	3.43098	0.000313769	0.00526171	UP
107405004	LOC107405004	miraculin-like	GO:0005576|GO:0005623|GO:0008152|GO:0003824|GO:0016787|GO:0030234|GO:0071944|GO:0044238|GO:0048046|GO:0005618|GO:0008233|GO:0019538|GO:0004857|GO:0030414|GO:0006508|GO:0004866	extracellular region|cell|metabolic process|catalytic activity|hydrolase activity|enzyme regulator activity|cell periphery|primary metabolic process|apoplast|cell wall|peptidase activity|protein metabolic process|enzyme inhibitor activity|peptidase inhibitor activity|proteolysis|endopeptidase inhibitor activity	-	-	-	-	NW_015453838.1:76446-77258	3.85757	146.664	5.24868	5.18357e-11	6.60714e-09	UP
107405023	LOC107405023	uncharacterized LOC107405023	GO:0005623|GO:0005622|GO:0043231|GO:0005737|GO:0009536|GO:0009507	cell|intracellular|intracellular membrane-bounded organelle|cytoplasm|plastid|chloroplast	-	-	-	-	NW_015453844.1:58194-59882	2.69572	21.4925	2.99509	6.29378e-08	3.68682e-06	UP
107405025	LOC107405025	endoglucanase 17-like	GO:0005576|GO:0008152|GO:0003824|GO:0016787|GO:0071554|GO:0044237|GO:0044238|GO:0044262|GO:0016798|GO:0005975|GO:0071555|GO:0016052|GO:0005976|GO:0004553|GO:0006073|GO:0008810|GO:0000272|GO:0009251|GO:0030245	extracellular region|metabolic process|catalytic activity|hydrolase activity|cell wall organization or biogenesis|cellular metabolic process|primary metabolic process|cellular carbohydrate metabolic process|hydrolase activity, acting on glycosyl bonds|carbohydrate metabolic process|cell wall organization|carbohydrate catabolic process|polysaccharide metabolic process|hydrolase activity, hydrolyzi…	-	-	-	-	NW_015453845.1:5-2004	6.09021	0.279461	-4.44577	9.3356e-06	0.000277868	DOWN
107405033	LOC107405033	probable pectinesterase/pectinesterase inhibitor 41	GO:0005576|GO:0005623|GO:0050896|GO:0008152|GO:0003824|GO:0016787|GO:0006950|GO:0071554|GO:0030234|GO:0071944|GO:0009607|GO:0051707|GO:0044238|GO:0009725|GO:0009620|GO:0009266|GO:0009409|GO:0016788|GO:0005975|GO:0004857|GO:0071555|GO:0016052|GO:0052689|GO:0046910|GO:0042545|GO:0005976|GO:0009741|GO:0030599|GO:0000272|GO:0045488|GO:0045490	extracellular region|cell|response to stimulus|metabolic process|catalytic activity|hydrolase activity|response to stress|cell wall organization or biogenesis|enzyme regulator activity|cell periphery|response to biotic stimulus|response to other organism|primary metabolic process|response to hormone|response to fungus|response to temperature stimulus|response to cold|hydrolase activity, acting on…	-	-	ko01100|ko00500|ko00040	Metabolic pathways|Starch and sucrose metabolism|Pentose and glucuronate interconversions	NW_015453845.1:14287-16678	0.0984348	11.3723	6.85214	2.04107e-14	4.92937e-12	UP
107405052	LOC107405052	ethylene-responsive transcription factor ERF027-like	GO:0005623|GO:0023052|GO:0050896|GO:0008152|GO:0003700|GO:0006950|GO:0051716|GO:0005622|GO:0044237|GO:0009607|GO:0009058|GO:0006807|GO:0051707|GO:0044238|GO:0009725|GO:0009620|GO:0007165|GO:0043231|GO:0006952|GO:0003676|GO:0006139|GO:0006725|GO:0070887|GO:0007154|GO:0009723|GO:0019438|GO:0010467|GO:0005634|GO:0003677|GO:0010468|GO:0009755|GO:0051252|GO:0035556|GO:0050832|GO:0016070|GO:0000160|GO:…	cell|signaling|response to stimulus|metabolic process|transcription factor activity, sequence-specific DNA binding|response to stress|cellular response to stimulus|intracellular|cellular metabolic process|response to biotic stimulus|biosynthetic process|nitrogen compound metabolic process|response to other organism|primary metabolic process|response to hormone|response to fungus|signal transducti…	-	-	-	-	NW_015453851.1:68757-71047	21.3653	3.59207	-2.57238	9.19313e-07	3.84659e-05	DOWN
107405121	LOC107405121	rRNA-processing protein efg1-like	GO:0005623|GO:0005622|GO:0043231|GO:0005634	cell|intracellular|intracellular membrane-bounded organelle|nucleus	-	-	-	-	NW_015453863.1:62430-64567	13.4549	2.95746	-2.1857	0.000309182	0.00519683	DOWN
107405153	LOC107405153	uncharacterized LOC107405153	GO:0005623|GO:0005198|GO:0008152|GO:0003735|GO:0005622|GO:0044237|GO:0009058|GO:0006807|GO:0044238|GO:0043231|GO:0019538|GO:0003676|GO:0005737|GO:0030529|GO:0006518|GO:0005840|GO:0042254|GO:0005829|GO:0010467|GO:0044267|GO:0003723|GO:0005739|GO:0015934|GO:0043043|GO:0022626|GO:0006412|GO:0022625	cell|structural molecule activity|metabolic process|structural constituent of ribosome|intracellular|cellular metabolic process|biosynthetic process|nitrogen compound metabolic process|primary metabolic process|intracellular membrane-bounded organelle|protein metabolic process|nucleic acid binding|cytoplasm|intracellular ribonucleoprotein complex|peptide metabolic process|ribosome|ribosome biogen…	-	-	-	-	NW_015453870.1:34206-36698	9.76935	2.40412	-2.02276	0.000288497	0.00493654	DOWN
107405158	LOC107405158	cyclic dof factor 2-like	GO:0032502|GO:0005623|GO:0000003|GO:0008152|GO:0003006|GO:0003700|GO:0005622|GO:0044237|GO:0009058|GO:0006807|GO:0050793|GO:0044238|GO:0005515|GO:2000026|GO:0009791|GO:0043231|GO:0007275|GO:0043169|GO:0003676|GO:0006139|GO:0006725|GO:0040034|GO:0048367|GO:0019438|GO:0010467|GO:0005634|GO:0003677|GO:0048507|GO:0009908|GO:0046872|GO:0010468|GO:0048509|GO:0051252|GO:0016070|GO:0048510|GO:0032774|GO:…	developmental process|cell|reproduction|metabolic process|developmental process involved in reproduction|transcription factor activity, sequence-specific DNA binding|intracellular|cellular metabolic process|biosynthetic process|nitrogen compound metabolic process|regulation of developmental process|primary metabolic process|protein binding|regulation of multicellular organismal development|post-e…	-	-	-	-	NW_015453870.1:62280-65928	29.9211	5.09089	-2.55517	3.64079e-09	2.9224e-07	DOWN
107405167	LOC107405167	phospholipase A1-II 1-like	GO:0032502|GO:0051179|GO:0005623|GO:0008152|GO:0003824|GO:0016787|GO:0005622|GO:0044237|GO:0050793|GO:0044238|GO:2000026|GO:0009791|GO:0007275|GO:0016788|GO:0005737|GO:0009845|GO:0044255|GO:0006629|GO:0019915|GO:0016298|GO:0010029|GO:0052689|GO:0016042|GO:0010187|GO:0090351|GO:0046486|GO:1900140|GO:0008970|GO:0047372|GO:0004806|GO:0004620|GO:0046340|GO:0052651	developmental process|localization|cell|metabolic process|catalytic activity|hydrolase activity|intracellular|cellular metabolic process|regulation of developmental process|primary metabolic process|regulation of multicellular organismal development|post-embryonic development|multicellular organism development|hydrolase activity, acting on ester bonds|cytoplasm|seed germination|cellular lipid met…	-	-	-	-	NW_015453872.1:26655-28742	17.3523	0.835136	-4.37697	1.28782e-09	1.16632e-07	DOWN
107405186	LOC107405186	pectinesterase-like	GO:0005576|GO:0005623|GO:0008152|GO:0003824|GO:0016787|GO:0071554|GO:0030234|GO:0071944|GO:0044238|GO:0005618|GO:0016788|GO:0005975|GO:0004857|GO:0071555|GO:0009505|GO:0016052|GO:0052689|GO:0046910|GO:0042545|GO:0005976|GO:0030599|GO:0000272|GO:0045488|GO:0045490	extracellular region|cell|metabolic process|catalytic activity|hydrolase activity|cell wall organization or biogenesis|enzyme regulator activity|cell periphery|primary metabolic process|cell wall|hydrolase activity, acting on ester bonds|carbohydrate metabolic process|enzyme inhibitor activity|cell wall organization|plant-type cell wall|carbohydrate catabolic process|carboxylic ester hydrolase ac…	-	-	ko01100|ko00500|ko00040	Metabolic pathways|Starch and sucrose metabolism|Pentose and glucuronate interconversions	NW_015453878.1:59783-61896	7.56835	1.35441	-2.48231	1.3837e-05	0.000386761	DOWN
107405210	LOC107405210	probable sulfate transporter 3.4	GO:0051179|GO:0016020|GO:0005623|GO:0030054|GO:0005215|GO:0031224|GO:0009506|GO:0071944|GO:0005911|GO:0022857|GO:0005886|GO:0016021|GO:0006810|GO:0022891|GO:0005887|GO:0055085|GO:0031226|GO:0006811|GO:0015075|GO:0034220|GO:0015116|GO:0008509|GO:0098656|GO:0008272|GO:0006820|GO:0015103|GO:1902358	localization|membrane|cell|cell junction|transporter activity|intrinsic component of membrane|plasmodesma|cell periphery|cell-cell junction|transmembrane transporter activity|plasma membrane|integral component of membrane|transport|substrate-specific transmembrane transporter activity|integral component of plasma membrane|transmembrane transport|intrinsic component of plasma membrane|ion transpor…	-	-	-	-	chr1:39542141-39546436	35.3701	4.38309	-3.01251	9.8445e-10	9.21901e-08	DOWN
107405225	LOC107405225	glutathione S-transferase L3-like	GO:0005623|GO:0050896|GO:0008152|GO:0003824|GO:0016740|GO:0005622|GO:0044237|GO:0006807|GO:0044238|GO:0019538|GO:0005737|GO:0016765|GO:0006790|GO:0006518|GO:0005829|GO:0006749|GO:0044267|GO:0010038|GO:0004364|GO:0046686|GO:0006464|GO:0010731	cell|response to stimulus|metabolic process|catalytic activity|transferase activity|intracellular|cellular metabolic process|nitrogen compound metabolic process|primary metabolic process|protein metabolic process|cytoplasm|transferase activity, transferring alkyl or aryl (other than methyl) groups|sulfur compound metabolic process|peptide metabolic process|cytosol|glutathione metabolic process|ce…	-	-	ko00480|ko01524|ko00982|ko00980	Glutathione metabolism|Platinum drug resistance|Drug metabolism - cytochrome P450|Metabolism of xenobiotics by cytochrome P450	NW_015453889.1:354-2958	6.86823	54.5174	2.98871	3.06889e-06	0.000110601	UP
107405232	LOC107405232	pleiotropic drug resistance protein 1-like	-	-	-	-	-	-	NW_015453890.1:55624-65347	0.0128343	1.55023	6.91633	4.53237e-09	3.57551e-07	UP
107405233	LOC107405233	uncharacterized LOC107405233	GO:0005623|GO:0005622|GO:0043231|GO:0005634	cell|intracellular|intracellular membrane-bounded organelle|nucleus	-	-	-	-	NW_015453890.1:31107-40788	6.68181	1.39704	-2.25786	0.000133085	0.0026079	DOWN
107405239	LOC107405239	uncharacterized LOC107405239	-	-	-	-	-	-	NW_015453891.1:8437-12176	3.22713	0.149064	-4.43625	0.000121913	0.00241997	DOWN
107405255	LOC107405255	uncharacterized LOC107405255	GO:0016020|GO:0031224|GO:0016021	membrane|intrinsic component of membrane|integral component of membrane	-	-	-	-	NW_015453895.1:60119-66947	3.71853	0.24959	-3.8971	8.12681e-06	0.000249162	DOWN
107405258	LOC107405258	rhodanese-like domain-containing protein 19, mitochondrial	GO:0032502|GO:0005623|GO:0050896|GO:0008152|GO:0003824|GO:0016491|GO:0071722|GO:0005622|GO:0043231|GO:0007568|GO:0005737|GO:0055114|GO:0030611|GO:0046685|GO:0009636|GO:0005739	developmental process|cell|response to stimulus|metabolic process|catalytic activity|oxidoreductase activity|detoxification of arsenic-containing substance|intracellular|intracellular membrane-bounded organelle|aging|cytoplasm|oxidation-reduction process|arsenate reductase activity|response to arsenic-containing substance|response to toxic substance|mitochondrion	-	-	-	-	NW_015453896.1:34735-35985	42.609	1.96587	-4.43792	3.78002e-09	3.02534e-07	DOWN
107405260	LOC107405260	Fanconi anemia group D2 protein	GO:0005623|GO:0050896|GO:0008152|GO:0006950|GO:0051716|GO:0005622|GO:0044237|GO:0006807|GO:0044238|GO:0043231|GO:0006139|GO:0006725|GO:0005737|GO:0006281|GO:0006974|GO:0005634|GO:0006259|GO:0009536|GO:0009507	cell|response to stimulus|metabolic process|response to stress|cellular response to stimulus|intracellular|cellular metabolic process|nitrogen compound metabolic process|primary metabolic process|intracellular membrane-bounded organelle|nucleobase-containing compound metabolic process|cellular aromatic compound metabolic process|cytoplasm|DNA repair|cellular response to DNA damage stimulus|nucleu…	-	-	ko03460	Fanconi anemia pathway	NW_015453896.1:60309-67524	2.55958	0.355766	-2.8469	7.33942e-05	0.00158859	DOWN
107405275	LOC107405275	protein EXORDIUM-like	GO:0005576|GO:0005623|GO:0050896|GO:0005622|GO:0071944|GO:0012505|GO:0005615|GO:0048046|GO:0009725|GO:0005618|GO:0043231|GO:0005737|GO:0005794|GO:0009505|GO:0005829|GO:0009741	extracellular region|cell|response to stimulus|intracellular|cell periphery|endomembrane system|extracellular space|apoplast|response to hormone|cell wall|intracellular membrane-bounded organelle|cytoplasm|Golgi apparatus|plant-type cell wall|cytosol|response to brassinosteroid	-	-	-	-	NW_015453898.1:54149-55200	3.75072	0.27502	-3.76956	9.97428e-05	0.00205087	DOWN
107405276	LOC107405276	7-deoxyloganetin glucosyltransferase-like	GO:0003824|GO:0016740|GO:0016757|GO:0008194|GO:0016758|GO:0046527|GO:0035251	catalytic activity|transferase activity|transferase activity, transferring glycosyl groups|UDP-glycosyltransferase activity|transferase activity, transferring hexosyl groups|glucosyltransferase activity|UDP-glucosyltransferase activity	-	-	-	-	NW_015453898.1:26116-28180	10.8333	59.3545	2.45388	0.000119525	0.00237943	UP
107405303	LOC107405303	cell wall / vacuolar inhibitor of fructosidase 1-like	GO:0005576|GO:0005623|GO:0008152|GO:0030234|GO:0005622|GO:0009892|GO:0071944|GO:0005618|GO:0043231|GO:0005737|GO:0050790|GO:0004857|GO:0043086|GO:0046910|GO:0005773	extracellular region|cell|metabolic process|enzyme regulator activity|intracellular|negative regulation of metabolic process|cell periphery|cell wall|intracellular membrane-bounded organelle|cytoplasm|regulation of catalytic activity|enzyme inhibitor activity|negative regulation of catalytic activity|pectinesterase inhibitor activity|vacuole	-	-	-	-	NW_015453904.1:44430-45282	5.82196	28.7693	2.30495	3.35991e-05	0.000818629	UP
107405330	LOC107405330	metacaspase-6-like	GO:0005576|GO:0005623|GO:0008152|GO:0003824|GO:0016787|GO:0005622|GO:0044238|GO:0010942|GO:0008233|GO:0043231|GO:0008219|GO:0019538|GO:0005737|GO:0006508|GO:0043068|GO:0012501|GO:0009536|GO:0043067|GO:0004175|GO:0008234|GO:0009507|GO:0004197	extracellular region|cell|metabolic process|catalytic activity|hydrolase activity|intracellular|primary metabolic process|positive regulation of cell death|peptidase activity|intracellular membrane-bounded organelle|cell death|protein metabolic process|cytoplasm|proteolysis|positive regulation of programmed cell death|programmed cell death|plastid|regulation of programmed cell death|endopeptidase…	-	-	-	-	NW_015453910.1:37755-39455	2.64789	0.0588642	-5.49131	5.54058e-05	0.00125241	DOWN
107405336	LOC107405336	uncharacterized LOC107405336	GO:0016020|GO:0005623|GO:0050896|GO:0006950|GO:0051716|GO:0005622|GO:0071944|GO:0009607|GO:0051707|GO:0006955|GO:0005886|GO:0005515|GO:0008219|GO:0006952|GO:0005737|GO:0009617|GO:0045087|GO:0000166|GO:0016045|GO:0017076|GO:0009626|GO:0043531|GO:0012501|GO:0042742|GO:0005524|GO:0030554	membrane|cell|response to stimulus|response to stress|cellular response to stimulus|intracellular|cell periphery|response to biotic stimulus|response to other organism|immune response|plasma membrane|protein binding|cell death|defense response|cytoplasm|response to bacterium|innate immune response|nucleotide binding|detection of bacterium|purine nucleotide binding|plant-type hypersensitive respon…	-	-	-	-	NW_015453911.1:18484-27016	4.01165	0.844511	-2.24801	0.00110261	0.0144351	DOWN
107405339	LOC107405339	G-type lectin S-receptor-like serine/threonine-protein kinase CES101	-	-	-	-	-	-	NW_015453912.1:41265-44823	1.93739	0.275118	-2.816	0.000859117	0.0118622	DOWN
107405366	LOC107405366	homeobox protein 5-like	GO:0005623|GO:0008152|GO:0003700|GO:0005622|GO:0044237|GO:0009058|GO:0006807|GO:0044238|GO:0003682|GO:0043231|GO:0003676|GO:0006139|GO:0006725|GO:0019438|GO:0010467|GO:0005634|GO:0003677|GO:0010468|GO:0051252|GO:0016070|GO:0032774|GO:0006351|GO:2001141|GO:0006355|GO:1903506	cell|metabolic process|transcription factor activity, sequence-specific DNA binding|intracellular|cellular metabolic process|biosynthetic process|nitrogen compound metabolic process|primary metabolic process|chromatin binding|intracellular membrane-bounded organelle|nucleic acid binding|nucleobase-containing compound metabolic process|cellular aromatic compound metabolic process|aromatic compound…	-	-	-	-	NW_015453918.1:31824-34351	5.99252	0.553463	-3.4366	0.00032396	0.00539581	DOWN
107405383	LOC107405383	putative E3 ubiquitin-protein ligase LIN-1	GO:0050896|GO:0008152|GO:0003824|GO:0016740|GO:0044237|GO:0016874|GO:0044238|GO:0019538|GO:0019787|GO:0004842|GO:0044267|GO:0010200|GO:0006464|GO:0070647|GO:0016567	response to stimulus|metabolic process|catalytic activity|transferase activity|cellular metabolic process|ligase activity|primary metabolic process|protein metabolic process|ubiquitin-like protein transferase activity|ubiquitin-protein transferase activity|cellular protein metabolic process|response to chitin|cellular protein modification process|protein modification by small protein conjugation …	-	-	-	-	NW_015453919.1:39133-46612	2.66762	0.62556	-2.09234	0.0051304	0.0477432	DOWN
107405394	LOC107405394	probable glutamate carboxypeptidase 2	GO:0032502|GO:0016020|GO:0005623|GO:0000003|GO:0050896|GO:0008152|GO:0003824|GO:0016787|GO:0003006|GO:0071944|GO:0050793|GO:0044238|GO:0005886|GO:0005515|GO:2000026|GO:0009791|GO:0009909|GO:0008233|GO:0007275|GO:0019538|GO:0043169|GO:0007389|GO:0009910|GO:0048316|GO:0009314|GO:0048364|GO:0009793|GO:0048367|GO:0010154|GO:0048831|GO:0006508|GO:0009640|GO:0048507|GO:0009790|GO:0009416|GO:0009908|GO:…	developmental process|membrane|cell|reproduction|response to stimulus|metabolic process|catalytic activity|hydrolase activity|developmental process involved in reproduction|cell periphery|regulation of developmental process|primary metabolic process|plasma membrane|protein binding|regulation of multicellular organismal development|post-embryonic development|regulation of flower development|peptid…	-	-	-	-	NW_015453922.1:31609-37577	4.25666	0.808447	-2.3965	0.00176682	0.0210125	DOWN
107405397	LOC107405397	probable carboxylesterase 15	GO:0005623|GO:0008152|GO:0003824|GO:0016787|GO:0005622|GO:0043231|GO:0016788|GO:0052689|GO:0005634	cell|metabolic process|catalytic activity|hydrolase activity|intracellular|intracellular membrane-bounded organelle|hydrolase activity, acting on ester bonds|carboxylic ester hydrolase activity|nucleus	-	-	-	-	NW_015453922.1:3199-3917	6.8127	0.420584	-4.01776	5.40073e-05	0.00122887	DOWN
107405404	LOC107405404	probable aquaporin TIP2-2	-	-	-	-	-	-	NW_015453923.1:23909-26919	136.913	18.9653	-2.85182	5.28311e-08	3.18979e-06	DOWN
107405418	LOC107405418	E2F transcription factor-like E2FE	GO:0005623|GO:0008152|GO:0003700|GO:0005622|GO:0009892|GO:0044237|GO:0009058|GO:0006807|GO:0044238|GO:0043234|GO:0005515|GO:0005667|GO:0043231|GO:0003676|GO:0006139|GO:0007049|GO:0006725|GO:0051726|GO:0019438|GO:0010467|GO:0005634|GO:0003677|GO:0010468|GO:0006259|GO:0051252|GO:0016070|GO:0006260|GO:0032876|GO:0042023|GO:0006275|GO:0032774|GO:0032875|GO:0006351|GO:2001141|GO:0006355|GO:0006261|GO:…	cell|metabolic process|transcription factor activity, sequence-specific DNA binding|intracellular|negative regulation of metabolic process|cellular metabolic process|biosynthetic process|nitrogen compound metabolic process|primary metabolic process|protein complex|protein binding|transcription factor complex|intracellular membrane-bounded organelle|nucleic acid binding|nucleobase-containing compo…	-	-	-	-	NW_015453926.1:22096-25818	3.77833	0.686769	-2.45985	0.000355775	0.00585137	DOWN
107405429	LOC107405429	putative cyclic nucleotide-gated ion channel 15	GO:0051179|GO:0016020|GO:0005623|GO:0005215|GO:0071944|GO:0022857|GO:0005886|GO:0005515|GO:0006810|GO:0022891|GO:0055085|GO:0005516|GO:0000166|GO:0006811|GO:0015075|GO:0030551|GO:0017076|GO:0034220|GO:0030552|GO:0015267|GO:0030553|GO:0006812|GO:0008324|GO:0030554|GO:0098655|GO:0005216|GO:0005261	localization|membrane|cell|transporter activity|cell periphery|transmembrane transporter activity|plasma membrane|protein binding|transport|substrate-specific transmembrane transporter activity|transmembrane transport|calmodulin binding|nucleotide binding|ion transport|ion transmembrane transporter activity|cyclic nucleotide binding|purine nucleotide binding|ion transmembrane transport|cAMP bindi…	-	-	ko04626	Plant-pathogen interaction	NW_015453928.1:50502-54682	0.0675224	1.05023	3.9592	0.00440135	0.042387	UP
107405433	LOC107405433	uncharacterized LOC107405433	-	-	-	-	-	-	NW_015453929.1:23420-30166	74.371	529.634	2.83218	2.04626e-09	1.76055e-07	UP
107405468	LOC107405468	cellulose synthase-like protein G2	GO:0016020|GO:0005623|GO:0008152|GO:0003824|GO:0031090|GO:0016740|GO:0031224|GO:0071554|GO:0005622|GO:0044237|GO:0071944|GO:0009058|GO:0012505|GO:0044238|GO:0005886|GO:0098588|GO:0043231|GO:0016021|GO:0016757|GO:0044262|GO:0005737|GO:0005975|GO:0071555|GO:0005794|GO:0016051|GO:0000139|GO:0008194|GO:0016758|GO:0005976|GO:0046527|GO:0006073|GO:0000271|GO:0009250|GO:0035251|GO:0016760|GO:0016759|GO:…	membrane|cell|metabolic process|catalytic activity|organelle membrane|transferase activity|intrinsic component of membrane|cell wall organization or biogenesis|intracellular|cellular metabolic process|cell periphery|biosynthetic process|endomembrane system|primary metabolic process|plasma membrane|bounding membrane of organelle|intracellular membrane-bounded organelle|integral component of membra…	-	-	-	-	NW_015453942.1:37483-42727	10.3782	0.209838	-5.62813	9.45596e-16	2.8609e-13	DOWN
107405473	LOC107405473	cellulose synthase-like protein G3	GO:0016020|GO:0005623|GO:0008152|GO:0003824|GO:0031090|GO:0016740|GO:0031224|GO:0071554|GO:0005622|GO:0044237|GO:0071944|GO:0009058|GO:0012505|GO:0044238|GO:0005886|GO:0098588|GO:0043231|GO:0016021|GO:0016757|GO:0044262|GO:0005737|GO:0005975|GO:0071555|GO:0005794|GO:0016051|GO:0000139|GO:0008194|GO:0016758|GO:0005976|GO:0046527|GO:0006073|GO:0000271|GO:0009250|GO:0035251|GO:0016760|GO:0016759|GO:…	membrane|cell|metabolic process|catalytic activity|organelle membrane|transferase activity|intrinsic component of membrane|cell wall organization or biogenesis|intracellular|cellular metabolic process|cell periphery|biosynthetic process|endomembrane system|primary metabolic process|plasma membrane|bounding membrane of organelle|intracellular membrane-bounded organelle|integral component of membra…	-	-	-	-	NW_015453942.1:26437-31554	1.38734	0.0542648	-4.67616	1.5224e-05	0.000421676	DOWN
107405481	LOC107405481	purple acid phosphatase 3-like	GO:0005576|GO:0005623|GO:0003824|GO:0016787|GO:0005622|GO:0043231|GO:0043169|GO:0016788|GO:0005737|GO:0042578|GO:0005773|GO:0046872|GO:0016791|GO:0003993|GO:0004721|GO:0004722	extracellular region|cell|catalytic activity|hydrolase activity|intracellular|intracellular membrane-bounded organelle|cation binding|hydrolase activity, acting on ester bonds|cytoplasm|phosphoric ester hydrolase activity|vacuole|metal ion binding|phosphatase activity|acid phosphatase activity|phosphoprotein phosphatase activity|protein serine/threonine phosphatase activity	-	-	ko01120|ko00627	Microbial metabolism in diverse environments|Aminobenzoate degradation	NW_015453944.1:51792-56138	37.7879	8.13398	-2.21589	8.0712e-05	0.00171463	DOWN
107405508	LOC107405508	glutathione S-transferase U9-like	GO:0005623|GO:0008152|GO:0003824|GO:0016740|GO:0005622|GO:0044237|GO:0006807|GO:0043231|GO:0005737|GO:0016765|GO:0006790|GO:0019748|GO:0006518|GO:0005634|GO:0006749|GO:0009407|GO:0004364	cell|metabolic process|catalytic activity|transferase activity|intracellular|cellular metabolic process|nitrogen compound metabolic process|intracellular membrane-bounded organelle|cytoplasm|transferase activity, transferring alkyl or aryl (other than methyl) groups|sulfur compound metabolic process|secondary metabolic process|peptide metabolic process|nucleus|glutathione metabolic process|toxin …	-	-	ko00480|ko01524|ko00982|ko00980	Glutathione metabolism|Platinum drug resistance|Drug metabolism - cytochrome P450|Metabolism of xenobiotics by cytochrome P450	NW_015453952.1:26925-27617	16.6805	128.447	2.94494	8.17709e-14	1.71856e-11	UP
107405526	LOC107405526	uncharacterized LOC107405526	-	-	-	-	-	-	NW_015453955.1:17689-23425	453.951	3292.53	2.85859	4.94632e-09	3.85785e-07	UP
107405547	LOC107405547	chitinase 1-like	-	-	-	-	-	-	NW_015453959.1:27918-32063	1.79449	41.6726	4.53745	6.01914e-09	4.61613e-07	UP
107405557	LOC107405557	non-specific lipid-transfer protein-like protein At2g13820	GO:0051179|GO:0016020|GO:0005623|GO:0008152|GO:0003824|GO:0016787|GO:0008289|GO:0031224|GO:0071944|GO:0044238|GO:0005886|GO:0008233|GO:0019538|GO:0006810|GO:0031225|GO:0071702|GO:0006508|GO:0006869	localization|membrane|cell|metabolic process|catalytic activity|hydrolase activity|lipid binding|intrinsic component of membrane|cell periphery|primary metabolic process|plasma membrane|peptidase activity|protein metabolic process|transport|anchored component of membrane|organic substance transport|proteolysis|lipid transport	-	-	-	-	NW_015453960.1:40191-41499	4.27332	20.5136	2.26315	0.00107442	0.0141739	UP
107405595	LOC107405595	cysteine-rich receptor-like protein kinase 25	GO:0005576|GO:0016020|GO:0005623|GO:0030054|GO:0050896|GO:0008152|GO:0003824|GO:0016740|GO:0006950|GO:0044237|GO:0009506|GO:0071944|GO:0005911|GO:0044238|GO:0005886|GO:0005515|GO:0019899|GO:0019538|GO:0006952|GO:0006793|GO:0016772|GO:0016773|GO:0016301|GO:0044267|GO:0006796|GO:0031625|GO:0006464|GO:0016310|GO:0004672|GO:0006468|GO:0004674	extracellular region|membrane|cell|cell junction|response to stimulus|metabolic process|catalytic activity|transferase activity|response to stress|cellular metabolic process|plasmodesma|cell periphery|cell-cell junction|primary metabolic process|plasma membrane|protein binding|enzyme binding|protein metabolic process|defense response|phosphorus metabolic process|transferase activity, transferring…	-	-	-	-	NW_015453967.1:36633-39690	0.0537795	1.2634	4.55411	0.000222098	0.00396807	UP
107405603	LOC107405603	DNA replication licensing factor MCM6	GO:0005623|GO:0008152|GO:0003824|GO:0016787|GO:0005622|GO:0044237|GO:0009058|GO:0006807|GO:0044238|GO:0043234|GO:0005515|GO:0043231|GO:0043169|GO:0003676|GO:0006139|GO:0007049|GO:0006725|GO:0016817|GO:0000347|GO:0000166|GO:0016818|GO:0017076|GO:0005634|GO:0003677|GO:0051276|GO:0046872|GO:0006259|GO:0005524|GO:0006260|GO:0016462|GO:0030554|GO:0006270|GO:0006261|GO:0017111|GO:0016887|GO:0006268|GO:…	cell|metabolic process|catalytic activity|hydrolase activity|intracellular|cellular metabolic process|biosynthetic process|nitrogen compound metabolic process|primary metabolic process|protein complex|protein binding|intracellular membrane-bounded organelle|cation binding|nucleic acid binding|nucleobase-containing compound metabolic process|cell cycle|cellular aromatic compound metabolic process|…	-	-	ko04110|ko04111|ko04113|ko03030	Cell cycle|Cell cycle - yeast|Meiosis - yeast|DNA replication	chr1:3014010-3019679	11.9945	2.34018	-2.35769	6.06417e-07	2.67562e-05	DOWN
107405621	LOC107405621	serine carboxypeptidase-like 34	GO:0005576|GO:0005623|GO:0008152|GO:0003824|GO:0016787|GO:0005622|GO:0071944|GO:0044238|GO:0005618|GO:0008233|GO:0043231|GO:0019538|GO:0005737|GO:0009505|GO:0006508|GO:0008236|GO:0005773|GO:0070008|GO:0004185|GO:0004180	extracellular region|cell|metabolic process|catalytic activity|hydrolase activity|intracellular|cell periphery|primary metabolic process|cell wall|peptidase activity|intracellular membrane-bounded organelle|protein metabolic process|cytoplasm|plant-type cell wall|proteolysis|serine-type peptidase activity|vacuole|serine-type exopeptidase activity|serine-type carboxypeptidase activity|carboxypepti…	-	-	-	-	NW_015453972.1:10607-18166	6.08191	1.3114	-2.21342	0.000475843	0.00747769	DOWN
107405707	LOC107405707	cysteine-rich receptor-like protein kinase 25	GO:0005576|GO:0016020|GO:0005623|GO:0030054|GO:0050896|GO:0008152|GO:0003824|GO:0016740|GO:0006950|GO:0044237|GO:0009506|GO:0071944|GO:0005911|GO:0044238|GO:0005886|GO:0005515|GO:0019899|GO:0019538|GO:0006952|GO:0006793|GO:0016772|GO:0016773|GO:0016301|GO:0044267|GO:0006796|GO:0031625|GO:0006464|GO:0016310|GO:0004672|GO:0006468|GO:0004674	extracellular region|membrane|cell|cell junction|response to stimulus|metabolic process|catalytic activity|transferase activity|response to stress|cellular metabolic process|plasmodesma|cell periphery|cell-cell junction|primary metabolic process|plasma membrane|protein binding|enzyme binding|protein metabolic process|defense response|phosphorus metabolic process|transferase activity, transferring…	-	-	-	-	NW_015453991.1:43461-46518	0.107559	2.85519	4.73039	3.16955e-06	0.000113477	UP
107405716	LOC107405716	23 kDa jasmonate-induced protein-like	-	-	-	-	-	-	NW_015453993.1:17662-24684	0.778883	3.99327	2.35809	0.00028552	0.00489778	UP
107405728	LOC107405728	leucine-rich repeat receptor protein kinase EMS1-like	GO:0016020|GO:0005623|GO:0008152|GO:0003824|GO:0016740|GO:0044237|GO:0071944|GO:0044238|GO:0005886|GO:0019538|GO:0006793|GO:0016772|GO:0016773|GO:0016301|GO:0044267|GO:0006796|GO:0006464|GO:0016310|GO:0004672|GO:0006468	membrane|cell|metabolic process|catalytic activity|transferase activity|cellular metabolic process|cell periphery|primary metabolic process|plasma membrane|protein metabolic process|phosphorus metabolic process|transferase activity, transferring phosphorus-containing groups|phosphotransferase activity, alcohol group as acceptor|kinase activity|cellular protein metabolic process|phosphate-containi…	-	-	-	-	NW_015453998.1:24510-26672	0.108028	1.25374	3.53676	0.00126623	0.0161546	UP
107405738	LOC107405738	cytochrome P450 81E8-like	GO:0005576|GO:0016020|GO:0005623|GO:0050896|GO:0019825|GO:0005622|GO:0071944|GO:0012505|GO:0005886|GO:0043231|GO:0080167|GO:0005737|GO:0005783	extracellular region|membrane|cell|response to stimulus|oxygen binding|intracellular|cell periphery|endomembrane system|plasma membrane|intracellular membrane-bounded organelle|response to karrikin|cytoplasm|endoplasmic reticulum	-	-	ko01100|ko01110|ko01120|ko00627|ko00945|ko00903|ko00363|ko00624	Metabolic pathways|Biosynthesis of secondary metabolites|Microbial metabolism in diverse environments|Aminobenzoate degradation|Stilbenoid, diarylheptanoid and gingerol biosynthesis|Limonene and pinene degradation|Bisphenol degradation|Polycyclic aromatic hydrocarbon degradation	NW_015454000.1:20100-23448	0.0336718	2.02985	5.91369	7.05857e-06	0.000222863	UP
107405743	LOC107405743	cytochrome P450 81E8-like	GO:0005576|GO:0016020|GO:0005623|GO:0050896|GO:0019825|GO:0005622|GO:0071944|GO:0012505|GO:0005886|GO:0043231|GO:0080167|GO:0005737|GO:0005783	extracellular region|membrane|cell|response to stimulus|oxygen binding|intracellular|cell periphery|endomembrane system|plasma membrane|intracellular membrane-bounded organelle|response to karrikin|cytoplasm|endoplasmic reticulum	-	-	ko01100|ko01110|ko01120|ko00627|ko00945|ko00903|ko00363|ko00624	Metabolic pathways|Biosynthesis of secondary metabolites|Microbial metabolism in diverse environments|Aminobenzoate degradation|Stilbenoid, diarylheptanoid and gingerol biosynthesis|Limonene and pinene degradation|Bisphenol degradation|Polycyclic aromatic hydrocarbon degradation	NW_015454000.1:11882-15568	12.0224	73.0651	2.60346	5.52192e-07	2.45605e-05	UP
107405785	LOC107405785	putative wall-associated receptor kinase-like 16	-	-	-	-	-	-	chr1:40568431-40571148	1.11279	0.057411	-4.27672	0.00457424	0.0436381	DOWN
107405843	LOC107405843	phospholipase A1-IIgamma-like	GO:0032502|GO:0051179|GO:0005623|GO:0008152|GO:0003824|GO:0016787|GO:0005622|GO:0044237|GO:0050793|GO:0044238|GO:2000026|GO:0009791|GO:0007275|GO:0016788|GO:0005737|GO:0009845|GO:0044255|GO:0006629|GO:0019915|GO:0016298|GO:0010029|GO:0052689|GO:0016042|GO:0010187|GO:0090351|GO:0046486|GO:1900140|GO:0008970|GO:0047372|GO:0004806|GO:0004620|GO:0046340|GO:0052651	developmental process|localization|cell|metabolic process|catalytic activity|hydrolase activity|intracellular|cellular metabolic process|regulation of developmental process|primary metabolic process|regulation of multicellular organismal development|post-embryonic development|multicellular organism development|hydrolase activity, acting on ester bonds|cytoplasm|seed germination|cellular lipid met…	-	-	-	-	NW_015454026.1:20935-23028	13.3969	0.312623	-5.42134	1.31894e-11	1.86221e-09	DOWN
107405879	LOC107405879	protein POLYCHOME-like	GO:0032502|GO:0005623|GO:0000003|GO:0050896|GO:0008152|GO:0003006|GO:0006950|GO:0009653|GO:0005622|GO:0009892|GO:0044237|GO:0009607|GO:0009058|GO:0006807|GO:0051707|GO:0044238|GO:0005515|GO:0009791|GO:0009561|GO:0043231|GO:0031349|GO:0007275|GO:0019538|GO:0006952|GO:0006139|GO:0007049|GO:0006725|GO:0051726|GO:1900424|GO:0050790|GO:1900426|GO:0048316|GO:0009617|GO:0009314|GO:0009960|GO:0090626|GO:…	developmental process|cell|reproduction|response to stimulus|metabolic process|developmental process involved in reproduction|response to stress|anatomical structure morphogenesis|intracellular|negative regulation of metabolic process|cellular metabolic process|response to biotic stimulus|biosynthetic process|nitrogen compound metabolic process|response to other organism|primary metabolic process…	-	-	-	-	chr1:3374631-3377082	17.1447	3.45573	-2.3107	2.92707e-05	0.000726672	DOWN
107405888	LOC107405888	protein BREAST CANCER SUSCEPTIBILITY 1 homolog	GO:0005623|GO:0050896|GO:0008152|GO:0003824|GO:0016740|GO:0006950|GO:0051716|GO:0005622|GO:0044237|GO:0006807|GO:0044238|GO:0005515|GO:0043231|GO:0043169|GO:0006139|GO:0006725|GO:0006281|GO:0009314|GO:0019787|GO:0006974|GO:0006302|GO:0010212|GO:0005634|GO:0004842|GO:0046872|GO:0000725|GO:0006259|GO:0006310|GO:0010332|GO:0071479|GO:0000724|GO:0046914|GO:0071480|GO:0008270	cell|response to stimulus|metabolic process|catalytic activity|transferase activity|response to stress|cellular response to stimulus|intracellular|cellular metabolic process|nitrogen compound metabolic process|primary metabolic process|protein binding|intracellular membrane-bounded organelle|cation binding|nucleobase-containing compound metabolic process|cellular aromatic compound metabolic proce…	-	-	-	-	NW_015454035.1:35093-41546	2.77395	0.46699	-2.57048	0.000976213	0.0130896	DOWN
107405905	LOC107405905	zinc finger protein CONSTANS-LIKE 2	GO:0032502|GO:0005623|GO:0000003|GO:0003006|GO:0003700|GO:0005622|GO:0050793|GO:2000026|GO:0009791|GO:0009909|GO:0043231|GO:0007275|GO:0043169|GO:0003676|GO:0048367|GO:0048831|GO:0005634|GO:0003677|GO:0009657|GO:0009908|GO:0046872|GO:0009658|GO:0046914|GO:0008270	developmental process|cell|reproduction|developmental process involved in reproduction|transcription factor activity, sequence-specific DNA binding|intracellular|regulation of developmental process|regulation of multicellular organismal development|post-embryonic development|regulation of flower development|intracellular membrane-bounded organelle|multicellular organism development|cation binding…	-	-	-	-	NW_015454043.1:32006-34494	15.9285	2.37007	-2.74861	1.88055e-07	9.57032e-06	DOWN
107405906	LOC107405906	heat shock cognate 70 kDa protein-like	GO:0016020|GO:0005623|GO:0050896|GO:0006457|GO:0006950|GO:0005622|GO:0071944|GO:0009607|GO:0051707|GO:0005886|GO:0009615|GO:0009408|GO:0005618|GO:0043231|GO:0009266|GO:0005737|GO:0000166|GO:0005829|GO:0017076|GO:0009536|GO:0005524|GO:0030554|GO:0009507	membrane|cell|response to stimulus|protein folding|response to stress|intracellular|cell periphery|response to biotic stimulus|response to other organism|plasma membrane|response to virus|response to heat|cell wall|intracellular membrane-bounded organelle|response to temperature stimulus|cytoplasm|nucleotide binding|cytosol|purine nucleotide binding|plastid|ATP binding|adenyl nucleotide binding|c…	-	-	ko03040|ko04141|ko04144|ko04010|ko04213	Spliceosome|Protein processing in endoplasmic reticulum|Endocytosis|MAPK signaling pathway|Longevity regulating pathway - multiple species	chr1:40123468-40125896	4.05193	48.7238	3.58795	7.59904e-07	3.24871e-05	UP
107405908	LOC107405908	alpha-copaene synthase-like	GO:0008152|GO:0003824|GO:0044237|GO:0009058|GO:0044238|GO:0016829|GO:0044255|GO:0006629|GO:0006720|GO:0008610|GO:0008299|GO:0010333|GO:0046246|GO:1901928|GO:0010334|GO:0051762|GO:0047461	metabolic process|catalytic activity|cellular metabolic process|biosynthetic process|primary metabolic process|lyase activity|cellular lipid metabolic process|lipid metabolic process|isoprenoid metabolic process|lipid biosynthetic process|isoprenoid biosynthetic process|terpene synthase activity|terpene biosynthetic process|cadinene biosynthetic process|sesquiterpene synthase activity|sesquiterpe…	-	-	ko01100|ko01110|ko00909	Metabolic pathways|Biosynthesis of secondary metabolites|Sesquiterpenoid and triterpenoid biosynthesis	NW_015454044.1:43949-44637	3.46772	0.105525	-5.03832	0.000315206	0.00527554	DOWN
107405948	LOC107405948	nitronate monooxygenase-like	GO:0005623|GO:0050896|GO:0008152|GO:0003824|GO:0016491|GO:0005622|GO:0009607|GO:0051707|GO:0009620|GO:0043231|GO:0051213|GO:0005737|GO:0055114|GO:0004497|GO:0016701|GO:0009608|GO:0005829|GO:0009610|GO:0010038|GO:0005739|GO:0018580|GO:0046686	cell|response to stimulus|metabolic process|catalytic activity|oxidoreductase activity|intracellular|response to biotic stimulus|response to other organism|response to fungus|intracellular membrane-bounded organelle|dioxygenase activity|cytoplasm|oxidation-reduction process|monooxygenase activity|oxidoreductase activity, acting on single donors with incorporation of molecular oxygen|response to s…	-	-	-	-	NW_015454055.1:36415-40499	3.89179	22.6074	2.53829	2.54443e-07	1.25421e-05	UP
107405983	LOC107405983	probable glutathione S-transferase	GO:0005623|GO:0050896|GO:0008152|GO:0003824|GO:0016740|GO:0005622|GO:0044237|GO:0006807|GO:0005737|GO:0016765|GO:0006790|GO:0019748|GO:0006518|GO:0006749|GO:0009407|GO:0010038|GO:0004364|GO:0046686	cell|response to stimulus|metabolic process|catalytic activity|transferase activity|intracellular|cellular metabolic process|nitrogen compound metabolic process|cytoplasm|transferase activity, transferring alkyl or aryl (other than methyl) groups|sulfur compound metabolic process|secondary metabolic process|peptide metabolic process|glutathione metabolic process|toxin catabolic process|response t…	-	-	ko00480|ko01524|ko00982|ko00980	Glutathione metabolism|Platinum drug resistance|Drug metabolism - cytochrome P450|Metabolism of xenobiotics by cytochrome P450	NW_015454063.1:15916-17253	15.0669	2.01205	-2.90465	0.000319226	0.00533309	DOWN
107405996	LOC107405996	leucine-rich repeat extensin-like protein 2	GO:0032502|GO:0005576|GO:0005623|GO:0005198|GO:0030054|GO:0040007|GO:0004871|GO:0003824|GO:0016740|GO:0071554|GO:0009653|GO:0009506|GO:0071944|GO:0005911|GO:0005199|GO:0016049|GO:0048589|GO:0009927|GO:0060560|GO:0005618|GO:0007275|GO:0009826|GO:0010015|GO:0048364|GO:0016772|GO:0048869|GO:0071555|GO:0009505|GO:0000904|GO:0030154|GO:0016301|GO:0010053|GO:0000902|GO:0090558|GO:0022622|GO:0010054|GO:…	developmental process|extracellular region|cell|structural molecule activity|cell junction|growth|signal transducer activity|catalytic activity|transferase activity|cell wall organization or biogenesis|anatomical structure morphogenesis|plasmodesma|cell periphery|cell-cell junction|structural constituent of cell wall|cell growth|developmental growth|histidine phosphotransfer kinase activity|devel…	-	-	-	-	NW_015454067.1:2576-3985	5.11969	0.641465	-2.99662	0.000287231	0.004921	DOWN
107406029	LOC107406029	ethylene-responsive transcription factor ERF014	GO:0005623|GO:0023052|GO:0050896|GO:0008152|GO:0003700|GO:0006950|GO:0051716|GO:0005622|GO:0044237|GO:0009058|GO:0006807|GO:0044238|GO:0009725|GO:0009408|GO:0007165|GO:0043231|GO:0009266|GO:0003676|GO:0009409|GO:0006139|GO:0006725|GO:0070887|GO:0007154|GO:0009723|GO:0034605|GO:0070417|GO:0019438|GO:0010467|GO:0050826|GO:0005634|GO:0003677|GO:0009753|GO:0010468|GO:0009755|GO:0010628|GO:0051252|GO:…	cell|signaling|response to stimulus|metabolic process|transcription factor activity, sequence-specific DNA binding|response to stress|cellular response to stimulus|intracellular|cellular metabolic process|biosynthetic process|nitrogen compound metabolic process|primary metabolic process|response to hormone|response to heat|signal transduction|intracellular membrane-bounded organelle|response to t…	-	-	-	-	NW_015454072.1:5367-6736	10.43	2.27861	-2.19452	0.00428842	0.0416468	DOWN
107406041	LOC107406041	endochitinase EP3-like	GO:0032502|GO:0005576|GO:0005623|GO:0000003|GO:0050896|GO:0003824|GO:0016787|GO:0003006|GO:0006950|GO:0051716|GO:0071944|GO:0009607|GO:0051707|GO:0006955|GO:0005618|GO:0009791|GO:0008219|GO:0007275|GO:0006952|GO:0008061|GO:0016798|GO:0009611|GO:0048316|GO:0009617|GO:0045087|GO:0009793|GO:0010262|GO:0010154|GO:0009626|GO:0009790|GO:0012501|GO:0004553|GO:0004568	developmental process|extracellular region|cell|reproduction|response to stimulus|catalytic activity|hydrolase activity|developmental process involved in reproduction|response to stress|cellular response to stimulus|cell periphery|response to biotic stimulus|response to other organism|immune response|cell wall|post-embryonic development|cell death|multicellular organism development|defense respon…	-	-	ko01100|ko00520	Metabolic pathways|Amino sugar and nucleotide sugar metabolism	chr1:40454188-40455303	43.2562	267.847	2.63043	9.0731e-12	1.31474e-09	UP
107406045	LOC107406045	aspartic proteinase CDR1-like	-	-	-	-	-	-	NW_015454077.1:35855-38046	1.44567	0.0674278	-4.42225	0.000220776	0.00394957	DOWN
107406053	LOC107406053	endochitinase EP3-like	GO:0032502|GO:0005576|GO:0005623|GO:0000003|GO:0050896|GO:0003824|GO:0016787|GO:0003006|GO:0006950|GO:0051716|GO:0071944|GO:0009607|GO:0051707|GO:0006955|GO:0005618|GO:0009791|GO:0008219|GO:0007275|GO:0006952|GO:0008061|GO:0016798|GO:0009611|GO:0048316|GO:0009617|GO:0045087|GO:0009793|GO:0010262|GO:0010154|GO:0009626|GO:0009790|GO:0012501|GO:0004553|GO:0004568	developmental process|extracellular region|cell|reproduction|response to stimulus|catalytic activity|hydrolase activity|developmental process involved in reproduction|response to stress|cellular response to stimulus|cell periphery|response to biotic stimulus|response to other organism|immune response|cell wall|post-embryonic development|cell death|multicellular organism development|defense respon…	-	-	ko01100|ko00520	Metabolic pathways|Amino sugar and nucleotide sugar metabolism	chr1:40462338-40463474	21.5322	257.582	3.58047	9.5581e-10	9.01211e-08	UP
107406059	LOC107406059	calvin cycle protein CP12-2, chloroplastic-like	GO:0005623|GO:0050896|GO:0008152|GO:0006950|GO:0051716|GO:0005622|GO:0009892|GO:0044237|GO:0009058|GO:0044238|GO:0043234|GO:0005515|GO:0070482|GO:0009408|GO:0043231|GO:0009266|GO:0019538|GO:0009409|GO:0005737|GO:0015977|GO:0070887|GO:0015979|GO:0005975|GO:0009314|GO:0016051|GO:0034605|GO:0071454|GO:0070417|GO:0019253|GO:0043255|GO:0019685|GO:0009743|GO:0009532|GO:0044267|GO:0009416|GO:0080153|GO:…	cell|response to stimulus|metabolic process|response to stress|cellular response to stimulus|intracellular|negative regulation of metabolic process|cellular metabolic process|biosynthetic process|primary metabolic process|protein complex|protein binding|response to oxygen levels|response to heat|intracellular membrane-bounded organelle|response to temperature stimulus|protein metabolic process|re…	-	-	-	-	NW_015454079.1:36472-37135	28.0959	118.982	2.08231	1.94789e-05	0.000518159	UP
107406104	LOC107406104	probable xyloglucan endotransglucosylase/hydrolase protein 23	-	-	-	-	-	-	NW_015454093.1:28996-30357	3.37148	16.2278	2.26701	0.00013399	0.00262004	UP
107406125	LOC107406125	uncharacterized LOC107406125	GO:0005623|GO:0005622|GO:0043231|GO:0005737|GO:0005739	cell|intracellular|intracellular membrane-bounded organelle|cytoplasm|mitochondrion	-	-	ko01100|ko00190	Metabolic pathways|Oxidative phosphorylation	NW_015454101.1:1-9941	0.159274	1.04698	2.71665	0.0019271	0.0225009	UP
107406133	LOC107406133	U-box domain-containing protein 19-like	GO:0032502|GO:0005623|GO:0008152|GO:0003824|GO:0016740|GO:0005622|GO:0044237|GO:0016874|GO:0050793|GO:0044238|GO:2000026|GO:0009791|GO:0043231|GO:0007275|GO:0019538|GO:0043169|GO:0009845|GO:0019787|GO:0010029|GO:0005634|GO:0004842|GO:0044267|GO:0046872|GO:0090351|GO:1900140|GO:0006464|GO:0046914|GO:0070647|GO:0008270|GO:0016567	developmental process|cell|metabolic process|catalytic activity|transferase activity|intracellular|cellular metabolic process|ligase activity|regulation of developmental process|primary metabolic process|regulation of multicellular organismal development|post-embryonic development|intracellular membrane-bounded organelle|multicellular organism development|protein metabolic process|cation binding|…	-	-	-	-	NW_015454106.1:667-2551	6.11279	1.46185	-2.06403	0.00251937	0.027726	DOWN
107406150	LOC107406150	peroxidase 10-like	GO:0005576|GO:0016209|GO:0050896|GO:0008152|GO:0003824|GO:0016491|GO:0004601|GO:0006950|GO:0044237|GO:0046906|GO:0006979|GO:0043169|GO:0042744|GO:0055114|GO:0072593|GO:0042743|GO:0046872|GO:0020037	extracellular region|antioxidant activity|response to stimulus|metabolic process|catalytic activity|oxidoreductase activity|peroxidase activity|response to stress|cellular metabolic process|tetrapyrrole binding|response to oxidative stress|cation binding|hydrogen peroxide catabolic process|oxidation-reduction process|reactive oxygen species metabolic process|hydrogen peroxide metabolic process|me…	-	-	ko01100|ko01110|ko00940	Metabolic pathways|Biosynthesis of secondary metabolites|Phenylpropanoid biosynthesis	NW_015454113.1:8840-11228	41.9355	9.66701	-2.11703	9.30536e-05	0.00194087	DOWN
107406159	LOC107406159	transcription factor bHLH36	GO:0005623|GO:0050896|GO:0008152|GO:0003700|GO:0006950|GO:0005622|GO:0044237|GO:0009607|GO:0009058|GO:0006807|GO:0051707|GO:0044238|GO:0005515|GO:0009620|GO:0043231|GO:0006952|GO:0003676|GO:0006139|GO:0006725|GO:0046983|GO:0019438|GO:0010467|GO:0005634|GO:0003677|GO:0010468|GO:0051252|GO:0050832|GO:0016070|GO:0032774|GO:0006351|GO:2001141|GO:0006355|GO:1903506	cell|response to stimulus|metabolic process|transcription factor activity, sequence-specific DNA binding|response to stress|intracellular|cellular metabolic process|response to biotic stimulus|biosynthetic process|nitrogen compound metabolic process|response to other organism|primary metabolic process|protein binding|response to fungus|intracellular membrane-bounded organelle|defense response|nuc…	-	-	-	-	NW_015454116.1:26783-27808	0.280307	8.21087	4.87245	4.64082e-07	2.10912e-05	UP
107406160	LOC107406160	uncharacterized LOC107406160	GO:0005623|GO:0005622|GO:0043231|GO:0005737|GO:0005739	cell|intracellular|intracellular membrane-bounded organelle|cytoplasm|mitochondrion	-	-	ko01100|ko00190	Metabolic pathways|Oxidative phosphorylation	NW_015454117.1:27278-37200	0.139707	1.11253	2.99337	0.000998819	0.0133622	UP
107406162	LOC107406162	uncharacterized LOC107406162	GO:0005623|GO:0005622|GO:0043231|GO:0005737|GO:0005739	cell|intracellular|intracellular membrane-bounded organelle|cytoplasm|mitochondrion	-	-	ko01100|ko00190	Metabolic pathways|Oxidative phosphorylation	NW_015454118.1:27274-37212	0.0975411	1.12552	3.52844	0.00029377	0.0050112	UP
107406169	LOC107406169	purple acid phosphatase 8-like	GO:0005576|GO:0008152|GO:0003824|GO:0016787|GO:0044237|GO:0043169|GO:0016788|GO:0006793|GO:0042578|GO:0006796|GO:0046872|GO:0016311|GO:0016791|GO:0003993|GO:0004721|GO:0004722	extracellular region|metabolic process|catalytic activity|hydrolase activity|cellular metabolic process|cation binding|hydrolase activity, acting on ester bonds|phosphorus metabolic process|phosphoric ester hydrolase activity|phosphate-containing compound metabolic process|metal ion binding|dephosphorylation|phosphatase activity|acid phosphatase activity|phosphoprotein phosphatase activity|protei…	-	-	ko01120|ko00627	Microbial metabolism in diverse environments|Aminobenzoate degradation	NW_015454121.1:31006-32631	12.9923	1.59032	-3.03027	7.48985e-05	0.0016148	DOWN
107406178	LOC107406178	wall-associated receptor kinase 1-like	GO:0032502|GO:0016020|GO:0005623|GO:0040007|GO:0050896|GO:0008152|GO:0003824|GO:0016740|GO:0009653|GO:0044237|GO:0071944|GO:0016049|GO:0044238|GO:0048589|GO:0005886|GO:0060560|GO:0019538|GO:0009826|GO:0019725|GO:0006793|GO:0005975|GO:0016772|GO:0048869|GO:0016773|GO:0008361|GO:0006884|GO:0016301|GO:0044267|GO:0006796|GO:0009751|GO:0009311|GO:0000902|GO:0006464|GO:0030104|GO:0016310|GO:0009992|GO:…	developmental process|membrane|cell|growth|response to stimulus|metabolic process|catalytic activity|transferase activity|anatomical structure morphogenesis|cellular metabolic process|cell periphery|cell growth|primary metabolic process|developmental growth|plasma membrane|developmental growth involved in morphogenesis|protein metabolic process|unidimensional cell growth|cellular homeostasis|phos…	-	-	-	-	chr1:40575019-40578240	4.47752	0.477778	-3.22829	0.00256826	0.0281262	DOWN
107406200	LOC107406200	AAA-ATPase ASD, mitochondrial-like	GO:0032502|GO:0016020|GO:0005623|GO:0000003|GO:0003824|GO:0016787|GO:0003006|GO:0048609|GO:0005622|GO:0071944|GO:0032504|GO:0012505|GO:0005886|GO:0010431|GO:0009791|GO:0043231|GO:0007275|GO:0005737|GO:0005783|GO:0048316|GO:0016817|GO:0000166|GO:0016818|GO:0010154|GO:0017076|GO:0005739|GO:0005524|GO:0016462|GO:0030554|GO:0017111|GO:0016887	developmental process|membrane|cell|reproduction|catalytic activity|hydrolase activity|developmental process involved in reproduction|multicellular organismal reproductive process|intracellular|cell periphery|multicellular organism reproduction|endomembrane system|plasma membrane|seed maturation|post-embryonic development|intracellular membrane-bounded organelle|multicellular organism development…	-	-	-	-	NW_015454129.1:15040-16715	6.3546	0.517958	-3.61689	4.98917e-06	0.000166097	DOWN
107406218	LOC107406218	ankyrin repeat-containing protein At5g02620-like	GO:0016020|GO:0005623|GO:0031224|GO:0005622|GO:0071944|GO:0012505|GO:0005886|GO:0043231|GO:0016021|GO:0005737|GO:0005783	membrane|cell|intrinsic component of membrane|intracellular|cell periphery|endomembrane system|plasma membrane|intracellular membrane-bounded organelle|integral component of membrane|cytoplasm|endoplasmic reticulum	-	-	-	-	NW_015454136.1:20799-21155	1.26884	18.0973	3.83419	4.15107e-06	0.000142503	UP
107406219	LOC107406219	ankyrin repeat-containing protein YAR1-like	GO:0023052|GO:0050896|GO:0051716|GO:0007165|GO:0007154	signaling|response to stimulus|cellular response to stimulus|signal transduction|cell communication	-	-	-	-	NW_015454136.1:23524-24156	0.259849	10.1935	5.29383	6.71571e-07	2.90719e-05	UP
107406236	LOC107406236	succinate dehydrogenase cytochrome b560 subunit-like	GO:0016020|GO:0005623|GO:0008152|GO:0003824|GO:0016491|GO:0031090|GO:0005622|GO:0044237|GO:0071944|GO:0006807|GO:0070469|GO:0044238|GO:0005886|GO:0043234|GO:0022900|GO:0043231|GO:0044281|GO:0046906|GO:0006091|GO:0006139|GO:0006725|GO:0005737|GO:0019866|GO:1901135|GO:0045273|GO:0055114|GO:0006793|GO:0005746|GO:0045281|GO:0016627|GO:0031966|GO:0005743|GO:0022904|GO:0009116|GO:0006796|GO:0045333|GO:…	membrane|cell|metabolic process|catalytic activity|oxidoreductase activity|organelle membrane|intracellular|cellular metabolic process|cell periphery|nitrogen compound metabolic process|respiratory chain|primary metabolic process|plasma membrane|protein complex|electron transport chain|intracellular membrane-bounded organelle|small molecule metabolic process|tetrapyrrole binding|generation of pre…	-	-	ko01100|ko00190	Metabolic pathways|Oxidative phosphorylation	NW_015454143.1:1701-8952	0.0785726	0.812056	3.36948	0.000410835	0.00658388	UP
107406295	LOC107406295	shikimate O-hydroxycinnamoyltransferase-like	-	-	-	-	-	-	chr1:40118265-40121483	4.16444	0.446381	-3.22177	8.58988e-07	3.61615e-05	DOWN
107406302	LOC107406302	uncharacterized protein YqkD-like	GO:0005623|GO:0003824|GO:0016787|GO:0005622|GO:0043231|GO:0005737|GO:0005634	cell|catalytic activity|hydrolase activity|intracellular|intracellular membrane-bounded organelle|cytoplasm|nucleus	-	-	-	-	NW_015454167.1:5349-12420	12.396	2.44091	-2.34438	7.14027e-07	3.07165e-05	DOWN
107406362	LOC107406362	WAT1-related protein At5g07050-like	GO:0051179|GO:0016020|GO:0005623|GO:0005215|GO:0005622|GO:0071944|GO:0022857|GO:0005886|GO:0043231|GO:0006810|GO:0005737|GO:0009536|GO:0009507	localization|membrane|cell|transporter activity|intracellular|cell periphery|transmembrane transporter activity|plasma membrane|intracellular membrane-bounded organelle|transport|cytoplasm|plastid|chloroplast	-	-	-	-	NW_015454189.1:21839-25214	6.17344	0.489454	-3.65683	1.16812e-05	0.00033327	DOWN
107406363	LOC107406363	WAT1-related protein At5g07050-like	GO:0051179|GO:0016020|GO:0005623|GO:0005215|GO:0005622|GO:0071944|GO:0022857|GO:0005886|GO:0043231|GO:0006810|GO:0005737|GO:0009536|GO:0009507	localization|membrane|cell|transporter activity|intracellular|cell periphery|transmembrane transporter activity|plasma membrane|intracellular membrane-bounded organelle|transport|cytoplasm|plastid|chloroplast	-	-	-	-	NW_015454189.1:26053-29861	3.32932	0.452093	-2.88054	0.000603282	0.00901713	DOWN
107406383	LOC107406383	probable carboxylesterase 15	GO:0005623|GO:0008152|GO:0003824|GO:0016787|GO:0005622|GO:0043231|GO:0016788|GO:0052689|GO:0005634	cell|metabolic process|catalytic activity|hydrolase activity|intracellular|intracellular membrane-bounded organelle|hydrolase activity, acting on ester bonds|carboxylic ester hydrolase activity|nucleus	-	-	-	-	NW_015454197.1:25088-27811	9.74318	0.34418	-4.82316	1.19053e-07	6.47778e-06	DOWN
107406415	LOC107406415	RNA-dependent RNA polymerase 1-like	GO:0005623|GO:0050896|GO:0008152|GO:0003824|GO:0016740|GO:0005622|GO:0009892|GO:0044237|GO:0009607|GO:0010166|GO:0009058|GO:0006807|GO:0051707|GO:0044238|GO:0009615|GO:0043231|GO:0003676|GO:0006139|GO:0006725|GO:0060148|GO:0016458|GO:0010025|GO:0016772|GO:0060968|GO:0019438|GO:0010467|GO:0005634|GO:0016441|GO:0010468|GO:0016779|GO:0003723|GO:0009751|GO:0010629|GO:0016070|GO:0040029|GO:0032774|GO:…	cell|response to stimulus|metabolic process|catalytic activity|transferase activity|intracellular|negative regulation of metabolic process|cellular metabolic process|response to biotic stimulus|wax metabolic process|biosynthetic process|nitrogen compound metabolic process|response to other organism|primary metabolic process|response to virus|intracellular membrane-bounded organelle|nucleic acid b…	-	-	-	-	NW_015454212.1:2717-7133	0.0924819	0.830513	3.16676	0.00152944	0.0187136	UP
107406416	LOC107406416	RNA-dependent RNA polymerase 1-like	GO:0005623|GO:0050896|GO:0008152|GO:0003824|GO:0016740|GO:0005622|GO:0009892|GO:0044237|GO:0009607|GO:0010166|GO:0009058|GO:0006807|GO:0051707|GO:0044238|GO:0009615|GO:0043231|GO:0003676|GO:0006139|GO:0006725|GO:0060148|GO:0016458|GO:0010025|GO:0016772|GO:0060968|GO:0019438|GO:0010467|GO:0005634|GO:0016441|GO:0010468|GO:0016779|GO:0003723|GO:0009751|GO:0010629|GO:0016070|GO:0040029|GO:0032774|GO:…	cell|response to stimulus|metabolic process|catalytic activity|transferase activity|intracellular|negative regulation of metabolic process|cellular metabolic process|response to biotic stimulus|wax metabolic process|biosynthetic process|nitrogen compound metabolic process|response to other organism|primary metabolic process|response to virus|intracellular membrane-bounded organelle|nucleic acid b…	-	-	-	-	NW_015454212.1:23558-29027	1.12991	6.03699	2.41763	1.93595e-05	0.000515977	UP
107406436	LOC107406436	uncharacterized LOC107406436	GO:0005623|GO:0005622|GO:0043231|GO:0005737|GO:0005739	cell|intracellular|intracellular membrane-bounded organelle|cytoplasm|mitochondrion	-	-	-	-	NW_015454221.1:3360-5668	67.293	14.8734	-2.17772	1.71916e-05	0.000465406	DOWN
107406440	LOC107406440	uncharacterized LOC107406440	GO:0016020|GO:0005623|GO:0008152|GO:0003824|GO:0016740|GO:0031224|GO:0005622|GO:0044237|GO:0009058|GO:0012505|GO:0044238|GO:0043231|GO:0016021|GO:0019538|GO:0016757|GO:0005737|GO:1901135|GO:0006486|GO:0005975|GO:0005794|GO:0044267|GO:0016758|GO:0008378|GO:0006464	membrane|cell|metabolic process|catalytic activity|transferase activity|intrinsic component of membrane|intracellular|cellular metabolic process|biosynthetic process|endomembrane system|primary metabolic process|intracellular membrane-bounded organelle|integral component of membrane|protein metabolic process|transferase activity, transferring glycosyl groups|cytoplasm|carbohydrate derivative meta…	-	-	-	-	NW_015454223.1:3719-5583	0.485794	7.34834	3.919	2.95542e-07	1.42005e-05	UP
107406465	LOC107406465	AAA-ATPase At3g50940-like	GO:0016020|GO:0005623|GO:0003824|GO:0016787|GO:0071944|GO:0005886|GO:0016817|GO:0000166|GO:0016818|GO:0017076|GO:0005524|GO:0016462|GO:0030554|GO:0017111|GO:0016887	membrane|cell|catalytic activity|hydrolase activity|cell periphery|plasma membrane|hydrolase activity, acting on acid anhydrides|nucleotide binding|hydrolase activity, acting on acid anhydrides, in phosphorus-containing anhydrides|purine nucleotide binding|ATP binding|pyrophosphatase activity|adenyl nucleotide binding|nucleoside-triphosphatase activity|ATPase activity	-	-	-	-	NW_015454234.1:1243-2613	1.25995	34.0509	4.75626	4.44298e-16	1.43911e-13	UP
107406479	LOC107406479	omega-hydroxypalmitate O-feruloyl transferase-like	GO:0005623|GO:0008152|GO:0003824|GO:0016740|GO:0071554|GO:0005622|GO:0044237|GO:0009058|GO:0044238|GO:0016746|GO:0042546|GO:0044262|GO:0006725|GO:0005737|GO:0071669|GO:0005975|GO:0019748|GO:0071555|GO:0009698|GO:0016051|GO:0016747|GO:0009832|GO:0009664|GO:0019438|GO:0052325|GO:0009699|GO:0044550|GO:0005976|GO:0050734|GO:0010345|GO:0000271|GO:0052546|GO:0045488|GO:0045489	cell|metabolic process|catalytic activity|transferase activity|cell wall organization or biogenesis|intracellular|cellular metabolic process|biosynthetic process|primary metabolic process|transferase activity, transferring acyl groups|cell wall biogenesis|cellular carbohydrate metabolic process|cellular aromatic compound metabolic process|cytoplasm|plant-type cell wall organization or biogenesis|…	-	-	ko00073	Cutin, suberine and wax biosynthesis	NW_015454238.1:6-2071	1.09508	10.8632	3.31034	0.000926547	0.0125974	UP
107406481	LOC107406481	heat shock 70 kDa protein-like	GO:0016020|GO:0005623|GO:0050896|GO:0006457|GO:0006950|GO:0005622|GO:0071944|GO:0009607|GO:0051707|GO:0005886|GO:0009615|GO:0009408|GO:0005618|GO:0043231|GO:0009266|GO:0005737|GO:0000166|GO:0005829|GO:0017076|GO:0009536|GO:0005524|GO:0030554|GO:0009507	membrane|cell|response to stimulus|protein folding|response to stress|intracellular|cell periphery|response to biotic stimulus|response to other organism|plasma membrane|response to virus|response to heat|cell wall|intracellular membrane-bounded organelle|response to temperature stimulus|cytoplasm|nucleotide binding|cytosol|purine nucleotide binding|plastid|ATP binding|adenyl nucleotide binding|c…	-	-	ko03040|ko04141|ko04144|ko04010|ko04213	Spliceosome|Protein processing in endoplasmic reticulum|Endocytosis|MAPK signaling pathway|Longevity regulating pathway - multiple species	chr1:40127705-40130207	3.65008	59.2507	4.02083	5.12871e-13	9.54079e-11	UP
107406494	LOC107406494	snakin-2-like	GO:0032502|GO:0005576|GO:0005623|GO:0040007|GO:0023052|GO:0050896|GO:0051716|GO:0009653|GO:0071944|GO:0016049|GO:0048589|GO:0009725|GO:0060560|GO:0005618|GO:0007165|GO:0009826|GO:0070887|GO:0048869|GO:0007154|GO:0009505|GO:0009737|GO:0009755|GO:0000902|GO:0009739|GO:0009741|GO:0010476|GO:0071370|GO:0009740	developmental process|extracellular region|cell|growth|signaling|response to stimulus|cellular response to stimulus|anatomical structure morphogenesis|cell periphery|cell growth|developmental growth|response to hormone|developmental growth involved in morphogenesis|cell wall|signal transduction|unidimensional cell growth|cellular response to chemical stimulus|cellular developmental process|cell c…	-	-	-	-	NW_015454243.1:26724-27424	26.9698	4.08008	-2.72467	4.53433e-06	0.000154123	DOWN
107406516	LOC107406516	pectinesterase-like	GO:0005576|GO:0005623|GO:0008152|GO:0003824|GO:0016787|GO:0071554|GO:0030234|GO:0071944|GO:0044238|GO:0005618|GO:0016788|GO:0005975|GO:0004857|GO:0071555|GO:0009505|GO:0016052|GO:0052689|GO:0046910|GO:0042545|GO:0005976|GO:0030599|GO:0000272|GO:0045488|GO:0045490	extracellular region|cell|metabolic process|catalytic activity|hydrolase activity|cell wall organization or biogenesis|enzyme regulator activity|cell periphery|primary metabolic process|cell wall|hydrolase activity, acting on ester bonds|carbohydrate metabolic process|enzyme inhibitor activity|cell wall organization|plant-type cell wall|carbohydrate catabolic process|carboxylic ester hydrolase ac…	-	-	ko01100|ko00500|ko00040	Metabolic pathways|Starch and sucrose metabolism|Pentose and glucuronate interconversions	NW_015454252.1:15167-17235	7.61744	1.45605	-2.38725	2.32824e-05	0.00060302	DOWN
107406527	LOC107406527	ferric reduction oxidase 4-like	GO:0051179|GO:0005576|GO:0016020|GO:0008152|GO:0003824|GO:0016491|GO:0031224|GO:0016021|GO:0006810|GO:0043169|GO:0055114|GO:0006811|GO:0046872|GO:0000293	localization|extracellular region|membrane|metabolic process|catalytic activity|oxidoreductase activity|intrinsic component of membrane|integral component of membrane|transport|cation binding|oxidation-reduction process|ion transport|metal ion binding|ferric-chelate reductase activity	-	-	-	-	NW_015454256.1:656-2851	17.2681	2.99968	-2.52523	0.0048238	0.0454203	DOWN
107406589	LOC107406589	dirigent protein 16-like	GO:0005576|GO:0005623|GO:0005622|GO:0048046|GO:0043231|GO:0005737|GO:0009536|GO:0009507	extracellular region|cell|intracellular|apoplast|intracellular membrane-bounded organelle|cytoplasm|plastid|chloroplast	-	-	-	-	NW_015454280.1:14325-15191	2.17514	0.072176	-4.91344	0.00181302	0.0214416	DOWN
107406590	LOC107406590	dirigent protein 9-like	GO:0005576|GO:0008152|GO:0044237|GO:0009058|GO:0048046|GO:0006725|GO:0019748|GO:0009698|GO:0019438|GO:0009699|GO:0044550|GO:0009807	extracellular region|metabolic process|cellular metabolic process|biosynthetic process|apoplast|cellular aromatic compound metabolic process|secondary metabolic process|phenylpropanoid metabolic process|aromatic compound biosynthetic process|phenylpropanoid biosynthetic process|secondary metabolite biosynthetic process|lignan biosynthetic process	-	-	-	-	NW_015454280.1:16800-17984	51.8757	0.563125	-6.52546	6.27672e-25	1.01653e-21	DOWN
107406594	LOC107406594	scopoletin glucosyltransferase-like	-	-	-	-	-	-	NW_015454282.1:563-2483	0.153493	1.84978	3.59111	0.000370512	0.00605757	UP
107406625	LOC107406625	pectinesterase-like	GO:0005576|GO:0005623|GO:0008152|GO:0003824|GO:0016787|GO:0071554|GO:0030234|GO:0071944|GO:0044238|GO:0005618|GO:0016788|GO:0005975|GO:0004857|GO:0071555|GO:0009505|GO:0016052|GO:0052689|GO:0046910|GO:0042545|GO:0005976|GO:0030599|GO:0000272|GO:0045488|GO:0045490	extracellular region|cell|metabolic process|catalytic activity|hydrolase activity|cell wall organization or biogenesis|enzyme regulator activity|cell periphery|primary metabolic process|cell wall|hydrolase activity, acting on ester bonds|carbohydrate metabolic process|enzyme inhibitor activity|cell wall organization|plant-type cell wall|carbohydrate catabolic process|carboxylic ester hydrolase ac…	-	-	ko01100|ko00500|ko00040	Metabolic pathways|Starch and sucrose metabolism|Pentose and glucuronate interconversions	NW_015454294.1:12858-14926	6.8672	1.58507	-2.11518	0.000490741	0.00766369	DOWN
107406634	LOC107406634	uncharacterized LOC107406634	-	-	-	-	-	-	NW_015454298.1:17054-17676	18.2916	3.2793	-2.47973	0.00410392	0.0403533	DOWN
107406645	LOC107406645	ATP synthase subunit alpha, mitochondrial	GO:0016020|GO:0005623|GO:0008152|GO:0031090|GO:0005622|GO:0044237|GO:0009058|GO:0006807|GO:0044238|GO:0043234|GO:0043231|GO:0044281|GO:0006139|GO:0006725|GO:0005737|GO:0019866|GO:1901135|GO:0045261|GO:0006793|GO:0033178|GO:0016469|GO:0031966|GO:0005743|GO:0019438|GO:0009116|GO:0006796|GO:0006753|GO:0000275|GO:0005753|GO:0005740|GO:0005739|GO:0009259|GO:0006163|GO:0009165|GO:0009117|GO:0009142|GO:…	membrane|cell|metabolic process|organelle membrane|intracellular|cellular metabolic process|biosynthetic process|nitrogen compound metabolic process|primary metabolic process|protein complex|intracellular membrane-bounded organelle|small molecule metabolic process|nucleobase-containing compound metabolic process|cellular aromatic compound metabolic process|cytoplasm|organelle inner membrane|carbo…	-	-	ko01100|ko00190	Metabolic pathways|Oxidative phosphorylation	NW_015454301.1:19522-21213	1.89803	18.1496	3.25736	1.48762e-08	1.03689e-06	UP
107406664	LOC107406664	gibberellin 3-beta-dioxygenase 1	GO:0008152|GO:0003824|GO:0016491|GO:0044237|GO:0009058|GO:0044238|GO:0044281|GO:0051213|GO:0044255|GO:0006629|GO:0016705|GO:0006720|GO:0016706|GO:0008610|GO:0008299|GO:0016707|GO:0016114|GO:0019752|GO:0016102|GO:0009686|GO:0009685	metabolic process|catalytic activity|oxidoreductase activity|cellular metabolic process|biosynthetic process|primary metabolic process|small molecule metabolic process|dioxygenase activity|cellular lipid metabolic process|lipid metabolic process|oxidoreductase activity, acting on paired donors, with incorporation or reduction of molecular oxygen|isoprenoid metabolic process|oxidoreductase activit…	-	-	ko01110|ko00904	Biosynthesis of secondary metabolites|Diterpenoid biosynthesis	chr1:40900699-40901885	4.17642	0.0846774	-5.62415	2.1346e-05	0.0005599	DOWN
107406681	LOC107406681	cellulose synthase-like protein G2	GO:0016020|GO:0005623|GO:0008152|GO:0003824|GO:0031090|GO:0016740|GO:0031224|GO:0071554|GO:0005622|GO:0044237|GO:0071944|GO:0009058|GO:0012505|GO:0044238|GO:0005886|GO:0098588|GO:0043231|GO:0016021|GO:0016757|GO:0044262|GO:0005737|GO:0005975|GO:0071555|GO:0005794|GO:0016051|GO:0000139|GO:0008194|GO:0016758|GO:0005976|GO:0046527|GO:0006073|GO:0000271|GO:0009250|GO:0035251|GO:0016760|GO:0016759|GO:…	membrane|cell|metabolic process|catalytic activity|organelle membrane|transferase activity|intrinsic component of membrane|cell wall organization or biogenesis|intracellular|cellular metabolic process|cell periphery|biosynthetic process|endomembrane system|primary metabolic process|plasma membrane|bounding membrane of organelle|intracellular membrane-bounded organelle|integral component of membra…	-	-	-	-	NW_015454314.1:9392-14513	10.3955	0.260212	-5.32013	1.00396e-12	1.73561e-10	DOWN
107406686	LOC107406686	cellulose synthase-like protein G3	GO:0016020|GO:0005623|GO:0008152|GO:0003824|GO:0031090|GO:0016740|GO:0031224|GO:0071554|GO:0005622|GO:0044237|GO:0071944|GO:0009058|GO:0012505|GO:0044238|GO:0005886|GO:0098588|GO:0043231|GO:0016021|GO:0016757|GO:0044262|GO:0005737|GO:0005975|GO:0071555|GO:0005794|GO:0016051|GO:0000139|GO:0008194|GO:0016758|GO:0005976|GO:0046527|GO:0006073|GO:0000271|GO:0009250|GO:0035251|GO:0016760|GO:0016759|GO:…	membrane|cell|metabolic process|catalytic activity|organelle membrane|transferase activity|intrinsic component of membrane|cell wall organization or biogenesis|intracellular|cellular metabolic process|cell periphery|biosynthetic process|endomembrane system|primary metabolic process|plasma membrane|bounding membrane of organelle|intracellular membrane-bounded organelle|integral component of membra…	-	-	-	-	NW_015454314.1:20513-23154	1.79364	0.10895	-4.04115	7.53781e-05	0.00162007	DOWN
107406693	LOC107406693	cysteine-rich repeat secretory protein 38	GO:0005576|GO:0005623|GO:0050896|GO:0005622|GO:0071944|GO:0009725|GO:0005618|GO:0043231|GO:0005737|GO:0009737|GO:0005773	extracellular region|cell|response to stimulus|intracellular|cell periphery|response to hormone|cell wall|intracellular membrane-bounded organelle|cytoplasm|response to abscisic acid|vacuole	-	-	-	-	NW_015454317.1:12178-13033	3.09987	27.8847	3.16919	4.86161e-06	0.000162439	UP
107406730	LOC107406730	probable pectinesterase/pectinesterase inhibitor 17	GO:0005576|GO:0016020|GO:0005623|GO:0050896|GO:0008152|GO:0003824|GO:0016787|GO:0006950|GO:0071554|GO:0030234|GO:0071944|GO:0009607|GO:0051707|GO:0044238|GO:0009620|GO:0005618|GO:0006952|GO:0016788|GO:0005975|GO:0009617|GO:0004857|GO:0071555|GO:0009505|GO:0016052|GO:0052689|GO:0046910|GO:0042545|GO:0042742|GO:0005976|GO:0050829|GO:0030599|GO:0000272|GO:0045488|GO:0045490	extracellular region|membrane|cell|response to stimulus|metabolic process|catalytic activity|hydrolase activity|response to stress|cell wall organization or biogenesis|enzyme regulator activity|cell periphery|response to biotic stimulus|response to other organism|primary metabolic process|response to fungus|cell wall|defense response|hydrolase activity, acting on ester bonds|carbohydrate metaboli…	-	-	ko01100|ko00500|ko00040	Metabolic pathways|Starch and sucrose metabolism|Pentose and glucuronate interconversions	NW_015454339.1:21000-21991	71.781	8.86316	-3.01771	0.00542178	0.049774	DOWN
107406743	LOC107406743	equilibrative nucleotide transporter 3-like	GO:0051179|GO:0016020|GO:0005623|GO:0005215|GO:0031224|GO:0071944|GO:0022857|GO:0005886|GO:0016021|GO:0006810|GO:0022891|GO:0055085|GO:0005337|GO:0071702|GO:0015932|GO:1901642|GO:1901264|GO:0015858|GO:0015864	localization|membrane|cell|transporter activity|intrinsic component of membrane|cell periphery|transmembrane transporter activity|plasma membrane|integral component of membrane|transport|substrate-specific transmembrane transporter activity|transmembrane transport|nucleoside transmembrane transporter activity|organic substance transport|nucleobase-containing compound transmembrane transporter act…	-	-	-	-	NW_015454346.1:8761-11960	3.02654	0.564371	-2.42295	0.0022218	0.025225	DOWN
107406761	LOC107406761	uncharacterized LOC107406761	GO:0005623|GO:0008152|GO:0003824|GO:0016740|GO:0005622|GO:0044237|GO:0009058|GO:0006807|GO:0044238|GO:0003676|GO:0006139|GO:0006725|GO:0005737|GO:0016772|GO:0016779|GO:0003723|GO:0006259|GO:0006260|GO:0015074|GO:0003964|GO:0006278	cell|metabolic process|catalytic activity|transferase activity|intracellular|cellular metabolic process|biosynthetic process|nitrogen compound metabolic process|primary metabolic process|nucleic acid binding|nucleobase-containing compound metabolic process|cellular aromatic compound metabolic process|cytoplasm|transferase activity, transferring phosphorus-containing groups|nucleotidyltransferase …	-	-	-	-	NW_015454352.1:179-11881	41.7528	277.306	2.73153	6.45452e-09	4.89548e-07	UP
107406762	LOC107406762	uncharacterized LOC107406762	-	-	-	-	ko03410|ko04212|ko04210|ko04214	Base excision repair|Longevity regulating pathway - worm|Apoptosis|Apoptosis - fly	NW_015454352.1:15572-19575	1.04943	4.33021	2.04484	0.00171849	0.0205622	UP
107406771	LOC107406771	beta-amyrin 28-oxidase-like	GO:0008152|GO:0003824|GO:0016491|GO:0019825|GO:0046906|GO:0043169|GO:0055114|GO:0004497|GO:0016705|GO:0046872|GO:0020037|GO:0046914|GO:0005506	metabolic process|catalytic activity|oxidoreductase activity|oxygen binding|tetrapyrrole binding|cation binding|oxidation-reduction process|monooxygenase activity|oxidoreductase activity, acting on paired donors, with incorporation or reduction of molecular oxygen|metal ion binding|heme binding|transition metal ion binding|iron ion binding	-	-	-	-	NW_015454355.1:1674-3654	11.4518	0.242809	-5.55961	2.10548e-07	1.05396e-05	DOWN
107406783	LOC107406783	auxin efflux carrier component 2	GO:0051179|GO:0016020|GO:0005623|GO:0005215|GO:0050896|GO:0005622|GO:0071944|GO:0022857|GO:0005886|GO:0009725|GO:0009925|GO:0043231|GO:0016323|GO:0006810|GO:0005737|GO:0015562|GO:0022891|GO:0055085|GO:0009629|GO:0009606|GO:0009723|GO:0006811|GO:0015075|GO:0034220|GO:0009733|GO:0010329|GO:0009743|GO:0005773|GO:0080161|GO:0009630|GO:0006812|GO:0015293|GO:0060918|GO:0009672|GO:0008324|GO:0098655|GO:…	localization|membrane|cell|transporter activity|response to stimulus|intracellular|cell periphery|transmembrane transporter activity|plasma membrane|response to hormone|basal plasma membrane|intracellular membrane-bounded organelle|basolateral plasma membrane|transport|cytoplasm|efflux transmembrane transporter activity|substrate-specific transmembrane transporter activity|transmembrane transport…	-	-	-	-	NW_015454360.1:1615-4140	11.022	0.223064	-5.62678	5.90234e-10	5.90921e-08	DOWN
107406846	LOC107406846	cytochrome P450 93A3-like	GO:0008152|GO:0019825|GO:0055114	metabolic process|oxygen binding|oxidation-reduction process	-	-	-	-	chr1:3390354-3392027	8.76644	0.548341	-3.99885	9.50994e-08	5.31091e-06	DOWN
107406855	LOC107406855	uncharacterized LOC107406855	GO:0005623|GO:0005622|GO:0043231|GO:0005737|GO:0009536|GO:0009507	cell|intracellular|intracellular membrane-bounded organelle|cytoplasm|plastid|chloroplast	-	-	-	-	NW_015454400.1:7509-9365	0.128071	2.42767	4.24455	0.000626272	0.00928015	UP
107406870	LOC107406870	putative deoxyribonuclease TATDN1	GO:0005623|GO:0008152|GO:0003824|GO:0016787|GO:0005622|GO:0044237|GO:0006807|GO:0044238|GO:0043231|GO:0006139|GO:0006725|GO:0016788|GO:0005634|GO:0004518|GO:0006259|GO:0004536	cell|metabolic process|catalytic activity|hydrolase activity|intracellular|cellular metabolic process|nitrogen compound metabolic process|primary metabolic process|intracellular membrane-bounded organelle|nucleobase-containing compound metabolic process|cellular aromatic compound metabolic process|hydrolase activity, acting on ester bonds|nucleus|nuclease activity|DNA metabolic process|deoxyribon…	-	-	-	-	NW_015454404.1:13052-17397	2.92046	0.661337	-2.14274	0.00224287	0.0254118	DOWN
107406888	LOC107406888	tubulin-folding cofactor D	GO:0032502|GO:0005623|GO:0030054|GO:0000003|GO:0003006|GO:0006457|GO:0005622|GO:0009506|GO:0005911|GO:0005515|GO:0009791|GO:0007275|GO:0007049|GO:0005737|GO:0048316|GO:0008092|GO:0009793|GO:0051301|GO:0007017|GO:0005829|GO:0010154|GO:0000910|GO:0000278|GO:0009790|GO:0006461|GO:0015631|GO:0043623|GO:0000281|GO:0000911|GO:0007021	developmental process|cell|cell junction|reproduction|developmental process involved in reproduction|protein folding|intracellular|plasmodesma|cell-cell junction|protein binding|post-embryonic development|multicellular organism development|cell cycle|cytoplasm|seed development|cytoskeletal protein binding|embryo development ending in seed dormancy|cell division|microtubule-based process|cytosol|f…	-	-	-	-	NW_015454415.1:9763-17331	4.3527	0.716632	-2.60261	4.54053e-05	0.00105851	DOWN
107406898	LOC107406898	(+)-neomenthol dehydrogenase	GO:0005623|GO:0003824|GO:0016491|GO:0005622|GO:0005737	cell|catalytic activity|oxidoreductase activity|intracellular|cytoplasm	-	-	-	-	chr1:40981257-40984977	29.4527	2.46883	-3.5765	1.86694e-05	0.000501509	DOWN
107406940	LOC107406940	uncharacterized LOC107406940	-	-	-	-	-	-	NW_015454436.1:11219-14083	7.39676	341.239	5.52775	6.24035e-13	1.13033e-10	UP
107406947	LOC107406947	RING-H2 finger protein ATL39-like	GO:0016020|GO:0005623|GO:0008152|GO:0003824|GO:0016740|GO:0031224|GO:0005622|GO:0044237|GO:0016874|GO:0044238|GO:0043231|GO:0016021|GO:0019538|GO:0043169|GO:0019787|GO:0005634|GO:0004842|GO:0044267|GO:0046872|GO:0006464|GO:0046914|GO:0070647|GO:0008270|GO:0016567	membrane|cell|metabolic process|catalytic activity|transferase activity|intrinsic component of membrane|intracellular|cellular metabolic process|ligase activity|primary metabolic process|intracellular membrane-bounded organelle|integral component of membrane|protein metabolic process|cation binding|ubiquitin-like protein transferase activity|nucleus|ubiquitin-protein transferase activity|cellular…	-	-	-	-	NW_015454439.1:10462-11311	2.73467	15.7228	2.52342	0.000860013	0.0118627	UP
107406957	LOC107406957	chaperone protein DnaJ	GO:0005623|GO:0006457|GO:0005622|GO:0005737	cell|protein folding|intracellular|cytoplasm	-	-	-	-	NW_015454443.1:12265-14651	6.48806	46.3235	2.83589	1.60601e-12	2.6852e-10	UP
107406986	LOC107406986	UDP-glycosyltransferase 74E2-like	GO:0032502|GO:0050896|GO:0008152|GO:0003824|GO:0016740|GO:0006950|GO:0051716|GO:0009653|GO:0044237|GO:0006807|GO:0009725|GO:0044281|GO:0006970|GO:0007275|GO:0016757|GO:0006979|GO:0080167|GO:0006725|GO:0070887|GO:0009415|GO:0009414|GO:0009850|GO:0010016|GO:0007154|GO:0048367|GO:0006972|GO:0009737|GO:0080024|GO:0008194|GO:0042542|GO:0034599|GO:0042631|GO:0071470|GO:0009651|GO:0000302|GO:0016758|GO:…	developmental process|response to stimulus|metabolic process|catalytic activity|transferase activity|response to stress|cellular response to stimulus|anatomical structure morphogenesis|cellular metabolic process|nitrogen compound metabolic process|response to hormone|small molecule metabolic process|response to osmotic stress|multicellular organism development|transferase activity, transferring g…	-	-	-	-	chr1:41161696-41163418	6.85099	0.505533	-3.76044	2.0045e-05	0.000531163	DOWN
107407014	LOC107407014	leucine-rich repeat extensin-like protein 2	-	-	-	-	-	-	NW_015454470.1:1622-4161	4.99783	1.23879	-2.01237	0.00486786	0.0457725	DOWN
107407016	LOC107407016	probable WRKY transcription factor 75	GO:0032502|GO:0005623|GO:0050896|GO:0008152|GO:0003700|GO:0006950|GO:0051716|GO:0009653|GO:0005622|GO:0009892|GO:0044237|GO:0009058|GO:0006807|GO:0044238|GO:0009791|GO:0043231|GO:0007275|GO:0048569|GO:0003676|GO:0006139|GO:0006725|GO:0010015|GO:0048364|GO:0048513|GO:0048869|GO:0019438|GO:0010467|GO:0005634|GO:0003677|GO:0030154|GO:0010468|GO:0010053|GO:0043620|GO:0051252|GO:0010629|GO:0048528|GO:…	developmental process|cell|response to stimulus|metabolic process|transcription factor activity, sequence-specific DNA binding|response to stress|cellular response to stimulus|anatomical structure morphogenesis|intracellular|negative regulation of metabolic process|cellular metabolic process|biosynthetic process|nitrogen compound metabolic process|primary metabolic process|post-embryonic developm…	-	-	-	-	NW_015454471.1:13654-15523	1.34099	11.681	3.12279	4.55749e-05	0.00106156	UP
107407018	LOC107407018	leucine-rich repeat extensin-like protein 2	-	-	-	-	-	-	NW_015454472.1:1604-4143	2.64793	0.599392	-2.14329	0.00513095	0.0477432	DOWN
107407069	LOC107407069	uncharacterized LOC107407069	-	-	-	-	-	-	NW_015454493.1:1734-12650	40.2453	187.436	2.21951	2.38307e-06	8.86629e-05	UP
107407116	LOC107407116	GDSL esterase/lipase At5g37690-like	GO:0005576|GO:0008152|GO:0003824|GO:0016787|GO:0044238|GO:0016788|GO:0006629|GO:0016298|GO:0016042	extracellular region|metabolic process|catalytic activity|hydrolase activity|primary metabolic process|hydrolase activity, acting on ester bonds|lipid metabolic process|lipase activity|lipid catabolic process	-	-	-	-	NW_015454520.1:12417-14693	0.719208	5.18402	2.84959	0.000303508	0.00511707	UP
107407137	LOC107407137	uncharacterized LOC107407137	-	-	-	-	ko01100|ko00730	Metabolic pathways|Thiamine metabolism	NW_015454533.1:821-1783	1.10053	13.8712	3.65583	5.12042e-05	0.0011803	UP
107407175	LOC107407175	uncharacterized LOC107407175	GO:0032502|GO:0005623|GO:0000003|GO:0023052|GO:0050896|GO:0003006|GO:0051716|GO:0005622|GO:0007165|GO:0043231|GO:0008219|GO:0007275|GO:0043169|GO:0003676|GO:0005737|GO:0001890|GO:0070887|GO:0009968|GO:0048513|GO:0048869|GO:0007154|GO:0009966|GO:0005634|GO:0003677|GO:0030154|GO:0007166|GO:0046872|GO:0003723|GO:0012501|GO:0030512|GO:0006915|GO:0044822|GO:0046914|GO:0007178|GO:0008270	developmental process|cell|reproduction|signaling|response to stimulus|developmental process involved in reproduction|cellular response to stimulus|intracellular|signal transduction|intracellular membrane-bounded organelle|cell death|multicellular organism development|cation binding|nucleic acid binding|cytoplasm|placenta development|cellular response to chemical stimulus|negative regulation of s…	-	-	-	-	NW_015454557.1:354-2280	0.827229	16.7975	4.34381	1.48742e-15	4.45127e-13	UP
107407186	LOC107407186	uncharacterized LOC107407186	-	-	-	-	-	-	NW_015454560.1:9929-10913	5.21965	0.918503	-2.5066	0.00234771	0.0263395	DOWN
107407197	LOC107407197	monogalactosyldiacylglycerol synthase 2, chloroplastic-like	GO:0016020|GO:0005623|GO:0050896|GO:0008152|GO:0003824|GO:0019867|GO:0031090|GO:0016740|GO:0006950|GO:0051716|GO:0005622|GO:0044237|GO:0009058|GO:0030246|GO:0044238|GO:0042594|GO:0098588|GO:0043231|GO:0044281|GO:0016757|GO:0005737|GO:1901135|GO:0005975|GO:0044255|GO:0042170|GO:0006629|GO:0007154|GO:0006643|GO:0009527|GO:0006631|GO:0008194|GO:0031969|GO:0009526|GO:0046467|GO:0009267|GO:0008610|GO:…	membrane|cell|response to stimulus|metabolic process|catalytic activity|outer membrane|organelle membrane|transferase activity|response to stress|cellular response to stimulus|intracellular|cellular metabolic process|biosynthetic process|carbohydrate binding|primary metabolic process|response to starvation|bounding membrane of organelle|intracellular membrane-bounded organelle|small molecule meta…	-	-	ko01100|ko00561	Metabolic pathways|Glycerolipid metabolism	NW_015454568.1:5825-12028	65.1053	11.6842	-2.47822	2.18486e-11	2.99272e-09	DOWN
107407276	LOC107407276	cellulose synthase-like protein G3	GO:0016020|GO:0005623|GO:0008152|GO:0003824|GO:0031090|GO:0016740|GO:0031224|GO:0071554|GO:0005622|GO:0044237|GO:0071944|GO:0009058|GO:0012505|GO:0044238|GO:0005886|GO:0098588|GO:0043231|GO:0016021|GO:0016757|GO:0044262|GO:0005737|GO:0005975|GO:0071555|GO:0005794|GO:0016051|GO:0000139|GO:0008194|GO:0016758|GO:0005976|GO:0046527|GO:0006073|GO:0000271|GO:0009250|GO:0035251|GO:0016760|GO:0016759|GO:…	membrane|cell|metabolic process|catalytic activity|organelle membrane|transferase activity|intrinsic component of membrane|cell wall organization or biogenesis|intracellular|cellular metabolic process|cell periphery|biosynthetic process|endomembrane system|primary metabolic process|plasma membrane|bounding membrane of organelle|intracellular membrane-bounded organelle|integral component of membra…	-	-	-	-	NW_015454620.1:9326-12787	7.72467	0.0666799	-6.85608	2.86682e-15	8.13704e-13	DOWN
107407301	LOC107407301	21 kDa protein	GO:0005623|GO:0008152|GO:0030234|GO:0005622|GO:0009892|GO:0043231|GO:0005737|GO:0050790|GO:0004857|GO:0043086|GO:0046910|GO:0009536|GO:0009507	cell|metabolic process|enzyme regulator activity|intracellular|negative regulation of metabolic process|intracellular membrane-bounded organelle|cytoplasm|regulation of catalytic activity|enzyme inhibitor activity|negative regulation of catalytic activity|pectinesterase inhibitor activity|plastid|chloroplast	-	-	-	-	NW_015454642.1:11161-12124	6.45752	1.50949	-2.09692	0.0038121	0.0382627	DOWN
107407338	LOC107407338	basic 7S globulin 2-like	GO:0005576|GO:0016020|GO:0005623|GO:0050896|GO:0006950|GO:0005622|GO:0071944|GO:0012505|GO:0005886|GO:0005618|GO:0043231|GO:0006970|GO:0005737|GO:0005794|GO:0009505|GO:0009651	extracellular region|membrane|cell|response to stimulus|response to stress|intracellular|cell periphery|endomembrane system|plasma membrane|cell wall|intracellular membrane-bounded organelle|response to osmotic stress|cytoplasm|Golgi apparatus|plant-type cell wall|response to salt stress	-	-	-	-	NW_015454664.1:5780-6993	44.1479	186.798	2.08106	1.98736e-08	1.33124e-06	UP
107407358	LOC107407358	(-)-isopiperitenol/(-)-carveol dehydrogenase, mitochondrial-like	GO:0008152|GO:0003824|GO:0016491|GO:0044237|GO:0009058|GO:0044238|GO:0016614|GO:0044281|GO:0044255|GO:0006629|GO:0000166|GO:0006720|GO:0016616|GO:0006066|GO:0008610|GO:0008299|GO:0018459|GO:0016114|GO:0018458|GO:0016099|GO:0031525	metabolic process|catalytic activity|oxidoreductase activity|cellular metabolic process|biosynthetic process|primary metabolic process|oxidoreductase activity, acting on CH-OH group of donors|small molecule metabolic process|cellular lipid metabolic process|lipid metabolic process|nucleotide binding|isoprenoid metabolic process|oxidoreductase activity, acting on the CH-OH group of donors, NAD or …	-	-	ko01100|ko01110|ko01130|ko00280	Metabolic pathways|Biosynthesis of secondary metabolites|Biosynthesis of antibiotics|Valine, leucine and isoleucine degradation	NW_015454677.1:2937-4010	0.173599	18.7436	6.75449	1.63804e-10	1.88697e-08	UP
107407421	LOC107407421	peroxidase 21-like	GO:0005576|GO:0005623|GO:0030054|GO:0016209|GO:0050896|GO:0003824|GO:0016491|GO:0004601|GO:0006950|GO:0071554|GO:0005622|GO:0009506|GO:0071944|GO:0009607|GO:0005911|GO:0051707|GO:0009620|GO:0005618|GO:0006952|GO:0005737|GO:0071669|GO:0071555|GO:0009505|GO:0005829|GO:0009664|GO:0050832	extracellular region|cell|cell junction|antioxidant activity|response to stimulus|catalytic activity|oxidoreductase activity|peroxidase activity|response to stress|cell wall organization or biogenesis|intracellular|plasmodesma|cell periphery|response to biotic stimulus|cell-cell junction|response to other organism|response to fungus|cell wall|defense response|cytoplasm|plant-type cell wall organi…	-	-	ko01100|ko01110|ko00940	Metabolic pathways|Biosynthesis of secondary metabolites|Phenylpropanoid biosynthesis	NW_015454718.1:4103-7721	5.38074	47.374	3.13822	1.00864e-12	1.73561e-10	UP
107407516	LOC107407516	uncharacterized LOC107407516	GO:0005623|GO:0005622|GO:0043231|GO:0005634	cell|intracellular|intracellular membrane-bounded organelle|nucleus	-	-	-	-	NW_015454775.1:1063-3074	9.33504	1.51456	-2.62376	6.75106e-05	0.00149293	DOWN
107407530	LOC107407530	probable inorganic phosphate transporter 1-3	GO:0051179|GO:0016020|GO:0005623|GO:0005215|GO:0031224|GO:0005622|GO:0071944|GO:0022857|GO:0005886|GO:0016021|GO:0006810|GO:0005737|GO:0022891|GO:0005887|GO:0055085|GO:0031226|GO:0006811|GO:0015075|GO:0005315|GO:0008509|GO:0006820|GO:0015103|GO:0006817|GO:0015114	localization|membrane|cell|transporter activity|intrinsic component of membrane|intracellular|cell periphery|transmembrane transporter activity|plasma membrane|integral component of membrane|transport|cytoplasm|substrate-specific transmembrane transporter activity|integral component of plasma membrane|transmembrane transport|intrinsic component of plasma membrane|ion transport|ion transmembrane t…	-	-	-	-	NW_015454785.1:7318-10899	6.75246	1.32572	-2.34864	0.00387882	0.0387629	DOWN
107407540	LOC107407540	protein GAMETE EXPRESSED 1-like	GO:0032502|GO:0016020|GO:0005623|GO:0031224|GO:0005622|GO:0071944|GO:0005886|GO:0005515|GO:0043231|GO:0016021|GO:0007275|GO:0005737|GO:0042802|GO:0005887|GO:0031226|GO:0009790|GO:0048229|GO:0009536|GO:0009553|GO:0009507|GO:0009555	developmental process|membrane|cell|intrinsic component of membrane|intracellular|cell periphery|plasma membrane|protein binding|intracellular membrane-bounded organelle|integral component of membrane|multicellular organism development|cytoplasm|identical protein binding|integral component of plasma membrane|intrinsic component of plasma membrane|embryo development|gametophyte development|plastid…	-	-	-	-	NW_015454790.1:9162-11072	0.296644	3.10746	3.38893	6.16882e-05	0.00137653	UP
107407569	LOC107407569	UDP-glucose 6-dehydrogenase 1-like	GO:0005623|GO:0008152|GO:0003824|GO:0016491|GO:0071554|GO:0005622|GO:0044237|GO:0048037|GO:0071944|GO:0009058|GO:0006807|GO:0044238|GO:0016614|GO:0005618|GO:0043231|GO:0044281|GO:0006139|GO:0006725|GO:0005737|GO:1901135|GO:0071669|GO:0005975|GO:0050662|GO:0071555|GO:0000166|GO:0005829|GO:0009664|GO:0019438|GO:0005634|GO:0051287|GO:0016616|GO:0009225|GO:0005976|GO:0046398|GO:0003979|GO:0019752|GO:…	cell|metabolic process|catalytic activity|oxidoreductase activity|cell wall organization or biogenesis|intracellular|cellular metabolic process|cofactor binding|cell periphery|biosynthetic process|nitrogen compound metabolic process|primary metabolic process|oxidoreductase activity, acting on CH-OH group of donors|cell wall|intracellular membrane-bounded organelle|small molecule metabolic process…	-	-	ko01100|ko00520|ko00500|ko00053|ko00040	Metabolic pathways|Amino sugar and nucleotide sugar metabolism|Starch and sucrose metabolism|Ascorbate and aldarate metabolism|Pentose and glucuronate interconversions	NW_015454810.1:6162-8627	1.72653	55.3076	5.00153	1.76814e-21	1.62268e-18	UP
107407743	LOC107407743	nuclear transcription factor Y subunit A-2-like	GO:0005623|GO:0000003|GO:0008152|GO:0003700|GO:0005622|GO:0044237|GO:0019953|GO:0009058|GO:0006807|GO:0044238|GO:0043234|GO:0005667|GO:0043231|GO:0003676|GO:0006139|GO:0006725|GO:0009566|GO:0019438|GO:0010467|GO:0005634|GO:0003677|GO:0010468|GO:0051252|GO:0009567|GO:0016070|GO:0032774|GO:0006351|GO:2001141|GO:0006355|GO:0016602|GO:1903506	cell|reproduction|metabolic process|transcription factor activity, sequence-specific DNA binding|intracellular|cellular metabolic process|sexual reproduction|biosynthetic process|nitrogen compound metabolic process|primary metabolic process|protein complex|transcription factor complex|intracellular membrane-bounded organelle|nucleic acid binding|nucleobase-containing compound metabolic process|ce…	-	-	-	-	NW_015454928.1:7080-9079	7.78459	1.77903	-2.12953	0.00173361	0.0206801	DOWN
107407832	LOC107407832	magnesium transporter MRS2-3	GO:0051179|GO:0016020|GO:0005623|GO:0005215|GO:0031224|GO:0005622|GO:0071944|GO:0022857|GO:0005886|GO:0043231|GO:0016021|GO:0006810|GO:0022891|GO:0055085|GO:0006811|GO:0015075|GO:0005634|GO:0034220|GO:0006812|GO:0008324|GO:0098655|GO:0030001|GO:0046873|GO:0015095|GO:0015693	localization|membrane|cell|transporter activity|intrinsic component of membrane|intracellular|cell periphery|transmembrane transporter activity|plasma membrane|intracellular membrane-bounded organelle|integral component of membrane|transport|substrate-specific transmembrane transporter activity|transmembrane transport|ion transport|ion transmembrane transporter activity|nucleus|ion transmembrane …	-	-	-	-	NW_015454972.1:1937-5407	8.64922	2.01195	-2.10398	8.92288e-05	0.00187245	DOWN
107407922	LOC107407922	ethylene-responsive transcription factor ERF039-like	GO:0005623|GO:0040007|GO:0008152|GO:0003700|GO:0005622|GO:0044237|GO:0009058|GO:0006807|GO:0016049|GO:0044238|GO:0043231|GO:0003676|GO:0006139|GO:0006725|GO:0009825|GO:0019438|GO:0010467|GO:0005634|GO:0003677|GO:0010468|GO:0051252|GO:0016070|GO:0032774|GO:0006351|GO:2001141|GO:0006355|GO:1903506	cell|growth|metabolic process|transcription factor activity, sequence-specific DNA binding|intracellular|cellular metabolic process|biosynthetic process|nitrogen compound metabolic process|cell growth|primary metabolic process|intracellular membrane-bounded organelle|nucleic acid binding|nucleobase-containing compound metabolic process|cellular aromatic compound metabolic process|multidimensional…	-	-	-	-	NW_015455035.1:5478-6634	35.7963	2.99209	-3.58058	1.6327e-07	8.43369e-06	DOWN
107407960	LOC107407960	uncharacterized LOC107407960	GO:0005623|GO:0008152|GO:0005622|GO:0044237|GO:0009058|GO:0006807|GO:0044238|GO:0043231|GO:0003676|GO:0006139|GO:0006725|GO:0019438|GO:0010467|GO:0005634|GO:0003677|GO:0016070|GO:0032774|GO:0043565|GO:0006351	cell|metabolic process|intracellular|cellular metabolic process|biosynthetic process|nitrogen compound metabolic process|primary metabolic process|intracellular membrane-bounded organelle|nucleic acid binding|nucleobase-containing compound metabolic process|cellular aromatic compound metabolic process|aromatic compound biosynthetic process|gene expression|nucleus|DNA binding|RNA metabolic process…	-	-	-	-	chr1:41354555-41357489	1.75037	0.331788	-2.39932	0.005144	0.0478138	DOWN
107407963	LOC107407963	ethylene-responsive transcription factor ERF039-like	GO:0005623|GO:0040007|GO:0008152|GO:0003700|GO:0005622|GO:0044237|GO:0009058|GO:0006807|GO:0016049|GO:0044238|GO:0043231|GO:0003676|GO:0006139|GO:0006725|GO:0009825|GO:0019438|GO:0010467|GO:0005634|GO:0003677|GO:0010468|GO:0051252|GO:0016070|GO:0032774|GO:0006351|GO:2001141|GO:0006355|GO:1903506	cell|growth|metabolic process|transcription factor activity, sequence-specific DNA binding|intracellular|cellular metabolic process|biosynthetic process|nitrogen compound metabolic process|cell growth|primary metabolic process|intracellular membrane-bounded organelle|nucleic acid binding|nucleobase-containing compound metabolic process|cellular aromatic compound metabolic process|multidimensional…	-	-	-	-	NW_015455070.1:5442-6598	37.113	2.57765	-3.8478	2.87281e-10	3.11395e-08	DOWN
107408008	LOC107408008	myb-related protein 3R-1-like	GO:0005623|GO:0008152|GO:0003700|GO:0005622|GO:0044237|GO:0009058|GO:0006807|GO:0044238|GO:0003682|GO:0043231|GO:0003676|GO:0006139|GO:0006725|GO:0019438|GO:0010467|GO:0005634|GO:0003677|GO:0010468|GO:0051252|GO:0016070|GO:0032774|GO:0006351|GO:2001141|GO:0006355|GO:1903506	cell|metabolic process|transcription factor activity, sequence-specific DNA binding|intracellular|cellular metabolic process|biosynthetic process|nitrogen compound metabolic process|primary metabolic process|chromatin binding|intracellular membrane-bounded organelle|nucleic acid binding|nucleobase-containing compound metabolic process|cellular aromatic compound metabolic process|aromatic compound…	-	-	ko04151	PI3K-Akt signaling pathway	NW_015455103.1:1272-5224	0.141518	1.11015	2.97169	0.00202609	0.0233444	UP
107408088	LOC107408088	galactinol synthase 1-like	GO:0005623|GO:0050896|GO:0008152|GO:0003824|GO:0016740|GO:0006950|GO:0005622|GO:0009058|GO:0044238|GO:0009725|GO:0009408|GO:0044281|GO:0006970|GO:0009266|GO:0016757|GO:0006979|GO:0043169|GO:0009409|GO:0005737|GO:0005975|GO:0009415|GO:0009414|GO:0009314|GO:0016051|GO:0005996|GO:0009737|GO:0008194|GO:0009416|GO:0046872|GO:0042542|GO:0009651|GO:0000302|GO:0016758|GO:0008378|GO:0009642|GO:0035250|GO:…	cell|response to stimulus|metabolic process|catalytic activity|transferase activity|response to stress|intracellular|biosynthetic process|primary metabolic process|response to hormone|response to heat|small molecule metabolic process|response to osmotic stress|response to temperature stimulus|transferase activity, transferring glycosyl groups|response to oxidative stress|cation binding|response t…	-	-	ko00052	Galactose metabolism	NW_015455175.1:3069-5378	2.94868	53.6009	4.18412	4.36536e-10	4.5873e-08	UP
107408124	LOC107408124	uncharacterized LOC107408124	GO:0005623|GO:0005622|GO:0043231|GO:0005737|GO:0005634	cell|intracellular|intracellular membrane-bounded organelle|cytoplasm|nucleus	-	-	-	-	NW_015455209.1:5893-6632	1.24846	42.8749	5.10191	2.37708e-08	1.56195e-06	UP
107408186	LOC107408186	putative disease resistance protein RGA4	GO:0005576|GO:0050896|GO:0006950|GO:0005515|GO:0006952|GO:0000166|GO:0017076|GO:0043531|GO:0005524|GO:0030554	extracellular region|response to stimulus|response to stress|protein binding|defense response|nucleotide binding|purine nucleotide binding|ADP binding|ATP binding|adenyl nucleotide binding	-	-	-	-	chr1:41799874-41802126	1.07798	0.0851144	-3.66278	0.00343914	0.0353835	DOWN
107408221	LOC107408221	probable polygalacturonase At1g80170	GO:0005576|GO:0005623|GO:0008152|GO:0003824|GO:0016787|GO:0071554|GO:0071944|GO:0044238|GO:0005515|GO:0005618|GO:0016798|GO:0005975|GO:0071555|GO:0009505|GO:0004553|GO:0004650	extracellular region|cell|metabolic process|catalytic activity|hydrolase activity|cell wall organization or biogenesis|cell periphery|primary metabolic process|protein binding|cell wall|hydrolase activity, acting on glycosyl bonds|carbohydrate metabolic process|cell wall organization|plant-type cell wall|hydrolase activity, hydrolyzing O-glycosyl compounds|polygalacturonase activity	-	-	-	-	chr1:41829112-41834688	0.884436	3.70462	2.06649	0.00062889	0.00930893	UP
107408274	LOC107408274	patatin-like protein 2	GO:0016020|GO:0005623|GO:0045735|GO:0050896|GO:0008152|GO:0003824|GO:0016787|GO:0006950|GO:0051716|GO:0005622|GO:0044237|GO:0009607|GO:0009058|GO:0051707|GO:0044238|GO:0006955|GO:0009615|GO:0070482|GO:0001666|GO:0043231|GO:0008219|GO:0044281|GO:0051607|GO:0006952|GO:0016788|GO:0005737|GO:0070887|GO:0044255|GO:0006629|GO:0045087|GO:0016298|GO:0006631|GO:0052689|GO:0016042|GO:0009626|GO:0010038|GO:…	membrane|cell|nutrient reservoir activity|response to stimulus|metabolic process|catalytic activity|hydrolase activity|response to stress|cellular response to stimulus|intracellular|cellular metabolic process|response to biotic stimulus|biosynthetic process|response to other organism|primary metabolic process|immune response|response to virus|response to oxygen levels|response to hypoxia|intracel…	-	-	-	-	NW_015455334.1:2765-4973	0.644116	6.33491	3.29793	0.0013875	0.0173324	UP
107408303	LOC107408303	uncharacterized LOC107408303	-	-	-	-	-	-	chr1:41756522-41760409	293.515	22.2313	-3.72277	1.43173e-12	2.43323e-10	DOWN
107408448	LOC107408448	RNA-dependent RNA polymerase 1-like	GO:0005623|GO:0050896|GO:0008152|GO:0003824|GO:0016740|GO:0005622|GO:0009892|GO:0044237|GO:0009607|GO:0010166|GO:0009058|GO:0006807|GO:0051707|GO:0044238|GO:0009615|GO:0043231|GO:0003676|GO:0006139|GO:0006725|GO:0060148|GO:0016458|GO:0010025|GO:0016772|GO:0060968|GO:0019438|GO:0010467|GO:0005634|GO:0016441|GO:0010468|GO:0016779|GO:0003723|GO:0009751|GO:0010629|GO:0016070|GO:0040029|GO:0032774|GO:…	cell|response to stimulus|metabolic process|catalytic activity|transferase activity|intracellular|negative regulation of metabolic process|cellular metabolic process|response to biotic stimulus|wax metabolic process|biosynthetic process|nitrogen compound metabolic process|response to other organism|primary metabolic process|response to virus|intracellular membrane-bounded organelle|nucleic acid b…	-	-	-	-	NW_015455501.1:448-4826	0.882644	4.94288	2.48545	5.70073e-05	0.00128544	UP
107408482	LOC107408482	protein BREAST CANCER SUSCEPTIBILITY 1 homolog	GO:0016020|GO:0005623|GO:0050896|GO:0008152|GO:0003824|GO:0008283|GO:0016740|GO:0006950|GO:0051716|GO:0005622|GO:0009892|GO:0044237|GO:0071944|GO:0009058|GO:0006807|GO:0044238|GO:0005886|GO:0043234|GO:0045787|GO:0043231|GO:0044281|GO:0019538|GO:0006139|GO:0007049|GO:0006725|GO:0000151|GO:0051726|GO:0016570|GO:0006281|GO:0044255|GO:0006629|GO:0070531|GO:0042127|GO:0019787|GO:0006631|GO:0000152|GO:…	membrane|cell|response to stimulus|metabolic process|catalytic activity|cell proliferation|transferase activity|response to stress|cellular response to stimulus|intracellular|negative regulation of metabolic process|cellular metabolic process|cell periphery|biosynthetic process|nitrogen compound metabolic process|primary metabolic process|plasma membrane|protein complex|positive regulation of cel…	-	-	-	-	NW_015455545.1:1249-5407	1.89619	0.18235	-3.37832	0.000164758	0.00310757	DOWN
107408486	LOC107408486	ribonucleoside-diphosphate reductase large subunit	GO:0005623|GO:0050896|GO:0008152|GO:0003824|GO:0016491|GO:0005622|GO:0044237|GO:0009058|GO:0006807|GO:0044238|GO:0043234|GO:0005971|GO:0044281|GO:0006139|GO:0006725|GO:0005737|GO:1901135|GO:0006793|GO:0005829|GO:0019438|GO:0006796|GO:0006753|GO:0010038|GO:0006259|GO:0006260|GO:0009263|GO:0046686|GO:0009165|GO:0009117|GO:0009142|GO:0009202|GO:0004748	cell|response to stimulus|metabolic process|catalytic activity|oxidoreductase activity|intracellular|cellular metabolic process|biosynthetic process|nitrogen compound metabolic process|primary metabolic process|protein complex|ribonucleoside-diphosphate reductase complex|small molecule metabolic process|nucleobase-containing compound metabolic process|cellular aromatic compound metabolic process|…	-	-	ko01100|ko00230|ko00240|ko00480	Metabolic pathways|Purine metabolism|Pyrimidine metabolism|Glutathione metabolism	NW_015455548.1:578-5377	22.1205	4.41494	-2.32492	4.25473e-08	2.61476e-06	DOWN
107408521	LOC107408521	pleiotropic drug resistance protein 1-like	GO:0051179|GO:0016020|GO:0005623|GO:0005215|GO:0050896|GO:0003824|GO:0016787|GO:0031224|GO:0006950|GO:0071944|GO:0022857|GO:0005886|GO:0009725|GO:0016021|GO:0006810|GO:0006979|GO:0042493|GO:0055085|GO:0016817|GO:0006855|GO:0071702|GO:0009723|GO:0006811|GO:0015850|GO:0016818|GO:0009753|GO:0006869|GO:0015893|GO:0010193|GO:0016820|GO:0015399|GO:0009751|GO:0000302|GO:0015711|GO:0042626|GO:0006812|GO:…	localization|membrane|cell|transporter activity|response to stimulus|catalytic activity|hydrolase activity|intrinsic component of membrane|response to stress|cell periphery|transmembrane transporter activity|plasma membrane|response to hormone|integral component of membrane|transport|response to oxidative stress|response to drug|transmembrane transport|hydrolase activity, acting on acid anhydride…	-	-	-	-	NW_015455583.1:3448-5220	2.00083	36.4415	4.18691	2.90891e-09	2.38357e-07	UP
107408548	LOC107408548	glutathione S-transferase L3-like	GO:0005623|GO:0050896|GO:0008152|GO:0003824|GO:0016740|GO:0005622|GO:0044237|GO:0006807|GO:0044238|GO:0019538|GO:0005737|GO:0016765|GO:0006790|GO:0006518|GO:0005829|GO:0006749|GO:0044267|GO:0010038|GO:0004364|GO:0046686|GO:0006464|GO:0010731	cell|response to stimulus|metabolic process|catalytic activity|transferase activity|intracellular|cellular metabolic process|nitrogen compound metabolic process|primary metabolic process|protein metabolic process|cytoplasm|transferase activity, transferring alkyl or aryl (other than methyl) groups|sulfur compound metabolic process|peptide metabolic process|cytosol|glutathione metabolic process|ce…	-	-	ko00480|ko01524|ko00982|ko00980	Glutathione metabolism|Platinum drug resistance|Drug metabolism - cytochrome P450|Metabolism of xenobiotics by cytochrome P450	NW_015455621.1:1884-4595	5.35926	33.3079	2.63576	0.00039326	0.00636522	UP
107408651	LOC107408651	cinnamoyl-CoA reductase 1-like	GO:0048511|GO:0005623|GO:0050896|GO:0008152|GO:0003824|GO:0016491|GO:0006950|GO:0005622|GO:0044237|GO:0048037|GO:0009058|GO:0007623|GO:0009266|GO:0009409|GO:0006725|GO:0005737|GO:0055114|GO:0019748|GO:0050662|GO:0009698|GO:0009808|GO:0005829|GO:0019438|GO:0009699|GO:0044550|GO:0016620|GO:0009809|GO:0016621	rhythmic process|cell|response to stimulus|metabolic process|catalytic activity|oxidoreductase activity|response to stress|intracellular|cellular metabolic process|cofactor binding|biosynthetic process|circadian rhythm|response to temperature stimulus|response to cold|cellular aromatic compound metabolic process|cytoplasm|oxidation-reduction process|secondary metabolic process|coenzyme binding|ph…	-	-	ko01100|ko01110|ko00940	Metabolic pathways|Biosynthesis of secondary metabolites|Phenylpropanoid biosynthesis	chr1:41946267-41948839	3.37394	23.3606	2.79157	0.00105144	0.0139644	UP
107408701	LOC107408701	ABC transporter G family member 22-like	GO:0051179|GO:0016020|GO:0005623|GO:0005215|GO:0050896|GO:0003824|GO:0016787|GO:0031224|GO:0006950|GO:0005622|GO:0071944|GO:0022857|GO:0005886|GO:0043231|GO:0016021|GO:0006810|GO:0005737|GO:0055085|GO:0016817|GO:0009415|GO:0009414|GO:0016818|GO:0016820|GO:0015399|GO:0005739|GO:0042626|GO:0016462|GO:0006833|GO:0017111|GO:0010148|GO:0016887|GO:0042623	localization|membrane|cell|transporter activity|response to stimulus|catalytic activity|hydrolase activity|intrinsic component of membrane|response to stress|intracellular|cell periphery|transmembrane transporter activity|plasma membrane|intracellular membrane-bounded organelle|integral component of membrane|transport|cytoplasm|transmembrane transport|hydrolase activity, acting on acid anhydrides…	-	-	-	-	NW_015455800.1:161-4348	2.60107	0.637815	-2.0279	0.00465939	0.0443058	DOWN
107408712	LOC107408712	ABC transporter G family member 22-like	GO:0051179|GO:0016020|GO:0005623|GO:0005215|GO:0050896|GO:0003824|GO:0016787|GO:0031224|GO:0006950|GO:0005622|GO:0071944|GO:0022857|GO:0005886|GO:0043231|GO:0016021|GO:0006810|GO:0005737|GO:0055085|GO:0016817|GO:0009415|GO:0009414|GO:0016818|GO:0016820|GO:0015399|GO:0005739|GO:0042626|GO:0016462|GO:0006833|GO:0017111|GO:0010148|GO:0016887|GO:0042623	localization|membrane|cell|transporter activity|response to stimulus|catalytic activity|hydrolase activity|intrinsic component of membrane|response to stress|intracellular|cell periphery|transmembrane transporter activity|plasma membrane|intracellular membrane-bounded organelle|integral component of membrane|transport|cytoplasm|transmembrane transport|hydrolase activity, acting on acid anhydrides…	-	-	-	-	NW_015455807.1:155-4340	1.87449	0.252779	-2.89055	0.000678133	0.00992049	DOWN
107408729	LOC107408729	G-type lectin S-receptor-like serine/threonine-protein kinase CES101	-	-	-	-	-	-	NW_015455828.1:12-3570	1.56013	0.116272	-3.74609	0.000805132	0.0113215	DOWN
107408734	LOC107408734	polyphenol oxidase, chloroplastic-like	GO:0003824|GO:0016491|GO:0004497|GO:0016705|GO:0016682|GO:0004503|GO:0036263	catalytic activity|oxidoreductase activity|monooxygenase activity|oxidoreductase activity, acting on paired donors, with incorporation or reduction of molecular oxygen|oxidoreductase activity, acting on diphenols and related substances as donors, oxygen as acceptor|monophenol monooxygenase activity|L-DOPA monooxygenase activity	-	-	-	-	NW_015455834.1:546-2525	2.03375	10.3026	2.3408	2.2479e-05	0.000587185	UP
107408768	LOC107408768	uncharacterized LOC107408768	GO:0005623|GO:0030054|GO:0005622|GO:0009506|GO:0005911|GO:0043231|GO:0005737|GO:0005829|GO:0005634	cell|cell junction|intracellular|plasmodesma|cell-cell junction|intracellular membrane-bounded organelle|cytoplasm|cytosol|nucleus	-	-	-	-	chr1:41983004-41992493	3.54411	0.74084	-2.25819	0.000391716	0.00634396	DOWN
107408775	LOC107408775	reticuline oxidase-like protein	GO:0005576|GO:0016020|GO:0005623|GO:0009055|GO:0008152|GO:0003824|GO:0016491|GO:0005622|GO:0048037|GO:0071944|GO:0005886|GO:0048046|GO:0016614|GO:0043231|GO:0005737|GO:0055114|GO:0050662|GO:0000166|GO:0050660|GO:0016616|GO:0009536|GO:0008762|GO:0009507	extracellular region|membrane|cell|electron carrier activity|metabolic process|catalytic activity|oxidoreductase activity|intracellular|cofactor binding|cell periphery|plasma membrane|apoplast|oxidoreductase activity, acting on CH-OH group of donors|intracellular membrane-bounded organelle|cytoplasm|oxidation-reduction process|coenzyme binding|nucleotide binding|flavin adenine dinucleotide bindin…	-	-	-	-	NW_015455888.1:434-2082	0.578326	3.37507	2.54496	0.00402629	0.0397603	UP
107408803	LOC107408803	uncharacterized LOC107408803	GO:0005576|GO:0050896|GO:0006950|GO:0006952	extracellular region|response to stimulus|response to stress|defense response	-	-	-	-	NW_015455917.1:1294-2197	0.424614	6.17873	3.86309	5.46271e-05	0.00124092	UP
107408827	LOC107408827	probable LRR receptor-like serine/threonine-protein kinase RKF3	GO:0005576|GO:0016020|GO:0005623|GO:0023052|GO:0004871|GO:0050896|GO:0008152|GO:0003824|GO:0016740|GO:0051716|GO:0044237|GO:0071944|GO:0044238|GO:0005886|GO:0007165|GO:0019538|GO:0004702|GO:0006793|GO:0016772|GO:0007154|GO:0016773|GO:0016301|GO:0044267|GO:0006796|GO:0035556|GO:0006464|GO:0016310|GO:0004672|GO:0006468|GO:0004674|GO:0046777	extracellular region|membrane|cell|signaling|signal transducer activity|response to stimulus|metabolic process|catalytic activity|transferase activity|cellular response to stimulus|cellular metabolic process|cell periphery|primary metabolic process|plasma membrane|signal transduction|protein metabolic process|receptor signaling protein serine/threonine kinase activity|phosphorus metabolic process…	-	-	-	-	NW_015455942.1:840-2993	1.09577	0.15135	-2.85599	0.00382822	0.0383522	DOWN
107408838	LOC107408838	probably inactive leucine-rich repeat receptor-like protein kinase At5g48380	GO:0016020|GO:0005623|GO:0030054|GO:0023052|GO:0004871|GO:0050896|GO:0008152|GO:0003824|GO:0016740|GO:0051716|GO:0044237|GO:0004872|GO:0009506|GO:0071944|GO:0005911|GO:0038023|GO:0044238|GO:0005886|GO:0005515|GO:0009725|GO:0004888|GO:0019899|GO:0007165|GO:0019538|GO:0070887|GO:0006793|GO:0001653|GO:0016772|GO:0007154|GO:0016773|GO:0019199|GO:0016301|GO:0007166|GO:0044267|GO:0006796|GO:0009755|GO:…	membrane|cell|cell junction|signaling|signal transducer activity|response to stimulus|metabolic process|catalytic activity|transferase activity|cellular response to stimulus|cellular metabolic process|receptor activity|plasmodesma|cell periphery|cell-cell junction|signaling receptor activity|primary metabolic process|plasma membrane|protein binding|response to hormone|transmembrane signaling rece…	-	-	-	-	NW_015455958.1:80-2012	33.3898	4.08572	-3.03074	2.47874e-07	1.23185e-05	DOWN
107408867	LOC107408867	ethylene-responsive transcription factor ERF003-like	GO:0005623|GO:0023052|GO:0050896|GO:0008152|GO:0003700|GO:0051716|GO:0005622|GO:0044237|GO:0009058|GO:0006807|GO:0044238|GO:0009725|GO:0007165|GO:0043231|GO:0003676|GO:0006139|GO:0006725|GO:0070887|GO:0007154|GO:0009723|GO:0019438|GO:0010467|GO:0005634|GO:0003677|GO:0010468|GO:0009755|GO:0051252|GO:0035556|GO:0016070|GO:0000160|GO:0009873|GO:0032774|GO:0006351|GO:2001141|GO:0006355|GO:0071369|GO:…	cell|signaling|response to stimulus|metabolic process|transcription factor activity, sequence-specific DNA binding|cellular response to stimulus|intracellular|cellular metabolic process|biosynthetic process|nitrogen compound metabolic process|primary metabolic process|response to hormone|signal transduction|intracellular membrane-bounded organelle|nucleic acid binding|nucleobase-containing compou…	-	-	-	-	chr1:42085192-42086194	1.39279	6.39285	2.19849	0.00290091	0.0310287	UP
107408943	LOC107408943	LRR receptor-like serine/threonine-protein kinase GSO1	GO:0016020|GO:0005623|GO:0030054|GO:0023052|GO:0050896|GO:0008152|GO:0003824|GO:0016740|GO:0051716|GO:0044237|GO:0009506|GO:0071944|GO:0005911|GO:0044238|GO:0005886|GO:0009725|GO:0007165|GO:0019538|GO:0070887|GO:0006793|GO:0016772|GO:0007154|GO:0016773|GO:0016301|GO:0044267|GO:0006796|GO:0009755|GO:0006464|GO:0016310|GO:0004672|GO:0006468|GO:0046777	membrane|cell|cell junction|signaling|response to stimulus|metabolic process|catalytic activity|transferase activity|cellular response to stimulus|cellular metabolic process|plasmodesma|cell periphery|cell-cell junction|primary metabolic process|plasma membrane|response to hormone|signal transduction|protein metabolic process|cellular response to chemical stimulus|phosphorus metabolic process|tra…	-	-	-	-	NW_015456075.1:968-3787	8.35772	1.47178	-2.50554	1.11492e-05	0.000320417	DOWN
107408961	LOC107408961	uncharacterized LOC107408961	GO:0005623|GO:0005622|GO:0043231|GO:0005634	cell|intracellular|intracellular membrane-bounded organelle|nucleus	-	-	-	-	NW_015456099.1:1088-2019	2.37524	0.349795	-2.76349	0.00536861	0.0494013	DOWN
107408981	LOC107408981	CBL-interacting serine/threonine-protein kinase 25-like	GO:0016020|GO:0005623|GO:0023052|GO:0050896|GO:0008152|GO:0003824|GO:0016740|GO:0006950|GO:0051716|GO:0044237|GO:0071944|GO:0009607|GO:0051707|GO:0044238|GO:0005886|GO:0009620|GO:0007165|GO:0019538|GO:0006952|GO:0006793|GO:0016772|GO:0007154|GO:0000166|GO:0016773|GO:0017076|GO:0016301|GO:0044267|GO:0006796|GO:0050832|GO:0005524|GO:0006464|GO:0016310|GO:0004672|GO:0030554|GO:0006468|GO:0004674	membrane|cell|signaling|response to stimulus|metabolic process|catalytic activity|transferase activity|response to stress|cellular response to stimulus|cellular metabolic process|cell periphery|response to biotic stimulus|response to other organism|primary metabolic process|plasma membrane|response to fungus|signal transduction|protein metabolic process|defense response|phosphorus metabolic proce…	-	-	-	-	chr1:41906153-41908549	11.9541	52.6031	2.13764	1.23388e-08	8.93981e-07	UP
107409013	LOC107409013	nitronate monooxygenase-like	GO:0005623|GO:0050896|GO:0008152|GO:0003824|GO:0016491|GO:0005622|GO:0009607|GO:0051707|GO:0009620|GO:0043231|GO:0051213|GO:0005737|GO:0055114|GO:0004497|GO:0016701|GO:0009608|GO:0005829|GO:0009610|GO:0010038|GO:0005739|GO:0018580|GO:0046686	cell|response to stimulus|metabolic process|catalytic activity|oxidoreductase activity|intracellular|response to biotic stimulus|response to other organism|response to fungus|intracellular membrane-bounded organelle|dioxygenase activity|cytoplasm|oxidation-reduction process|monooxygenase activity|oxidoreductase activity, acting on single donors with incorporation of molecular oxygen|response to s…	-	-	-	-	NW_015456178.1:6-3274	4.12742	27.7429	2.74881	2.31526e-07	1.15478e-05	UP
107409025	LOC107409025	probable WRKY transcription factor 75	GO:0032502|GO:0005623|GO:0050896|GO:0008152|GO:0003700|GO:0006950|GO:0051716|GO:0009653|GO:0005622|GO:0009892|GO:0044237|GO:0009058|GO:0006807|GO:0044238|GO:0009791|GO:0043231|GO:0007275|GO:0048569|GO:0003676|GO:0006139|GO:0006725|GO:0010015|GO:0048364|GO:0048513|GO:0048869|GO:0019438|GO:0010467|GO:0005634|GO:0003677|GO:0030154|GO:0010468|GO:0010053|GO:0043620|GO:0051252|GO:0010629|GO:0048528|GO:…	developmental process|cell|response to stimulus|metabolic process|transcription factor activity, sequence-specific DNA binding|response to stress|cellular response to stimulus|anatomical structure morphogenesis|intracellular|negative regulation of metabolic process|cellular metabolic process|biosynthetic process|nitrogen compound metabolic process|primary metabolic process|post-embryonic developm…	-	-	-	-	NW_015456196.1:1211-3080	1.33141	12.6939	3.25311	0.000151261	0.00289404	UP
107409037	LOC107409037	uncharacterized LOC107409037	-	-	-	-	-	-	NW_015456209.1:2315-2876	16.3897	323.381	4.30237	3.74205e-11	4.91987e-09	UP
107409058	LOC107409058	probable sodium/metabolite cotransporter BASS3, chloroplastic	GO:0051179|GO:0016020|GO:0005623|GO:0005215|GO:0031224|GO:0005622|GO:0022857|GO:0043231|GO:0016021|GO:0005319|GO:0006810|GO:0005737|GO:0022891|GO:0055085|GO:0071702|GO:0006811|GO:0015075|GO:0005342|GO:0034220|GO:1903825|GO:0009526|GO:0009536|GO:0006812|GO:0015293|GO:0008509|GO:0098656|GO:0008324|GO:0008508|GO:0006820|GO:0098655|GO:0009507|GO:0009941|GO:0030001|GO:0015294|GO:0015672|GO:0008514|GO:…	localization|membrane|cell|transporter activity|intrinsic component of membrane|intracellular|transmembrane transporter activity|intracellular membrane-bounded organelle|integral component of membrane|lipid transporter activity|transport|cytoplasm|substrate-specific transmembrane transporter activity|transmembrane transport|organic substance transport|ion transport|ion transmembrane transporter a…	-	-	-	-	NW_015456236.1:1-3451	0.5734	3.46406	2.59485	0.00073976	0.0106134	UP
107409089	LOC107409089	annexin D5-like	GO:0032502|GO:0000003|GO:0040007|GO:0050896|GO:0008289|GO:0003006|GO:0006950|GO:0009653|GO:0016049|GO:0048589|GO:0005515|GO:0060560|GO:0009856|GO:0009408|GO:0009846|GO:0006970|GO:0009266|GO:0007275|GO:0009826|GO:0043169|GO:0009409|GO:0009860|GO:0009415|GO:0009414|GO:0008092|GO:0009314|GO:0005543|GO:0032403|GO:0048869|GO:0048868|GO:0000904|GO:0009932|GO:0005544|GO:0030154|GO:0048229|GO:0051015|GO:…	developmental process|reproduction|growth|response to stimulus|lipid binding|developmental process involved in reproduction|response to stress|anatomical structure morphogenesis|cell growth|developmental growth|protein binding|developmental growth involved in morphogenesis|pollination|response to heat|pollen germination|response to osmotic stress|response to temperature stimulus|multicellular org…	-	-	-	-	NW_015456283.1:914-3281	16.1011	86.065	2.41827	6.3798e-08	3.72137e-06	UP
107409115	LOC107409115	patellin-4	GO:0051179|GO:0016020|GO:0005623|GO:0005215|GO:0008289|GO:0031224|GO:0005622|GO:0071944|GO:0005886|GO:0043231|GO:0016021|GO:0006810|GO:0007049|GO:0005737|GO:0051301|GO:0005829|GO:0005634	localization|membrane|cell|transporter activity|lipid binding|intrinsic component of membrane|intracellular|cell periphery|plasma membrane|intracellular membrane-bounded organelle|integral component of membrane|transport|cell cycle|cytoplasm|cell division|cytosol|nucleus	-	-	-	-	NW_015456324.1:7-2282	42.4326	9.16561	-2.21087	8.90049e-09	6.60507e-07	DOWN
107409116	LOC107409116	basic 7S globulin-like	GO:0005576|GO:0016020|GO:0005623|GO:0030054|GO:0050896|GO:0006950|GO:0005622|GO:0009506|GO:0071944|GO:0005911|GO:0012505|GO:0005886|GO:0005618|GO:0043231|GO:0006970|GO:0005737|GO:0005794|GO:0009505|GO:0005829|GO:0009651	extracellular region|membrane|cell|cell junction|response to stimulus|response to stress|intracellular|plasmodesma|cell periphery|cell-cell junction|endomembrane system|plasma membrane|cell wall|intracellular membrane-bounded organelle|response to osmotic stress|cytoplasm|Golgi apparatus|plant-type cell wall|cytosol|response to salt stress	-	-	-	-	NW_015456325.1:1139-2581	67.0056	345.594	2.36672	6.34653e-11	7.9424e-09	UP
107409157	LOC107409157	basic 7S globulin-like	GO:0005576|GO:0016020|GO:0005623|GO:0030054|GO:0050896|GO:0006950|GO:0005622|GO:0009506|GO:0071944|GO:0005911|GO:0012505|GO:0005886|GO:0005618|GO:0043231|GO:0006970|GO:0005737|GO:0005794|GO:0009505|GO:0005829|GO:0009651	extracellular region|membrane|cell|cell junction|response to stimulus|response to stress|intracellular|plasmodesma|cell periphery|cell-cell junction|endomembrane system|plasma membrane|cell wall|intracellular membrane-bounded organelle|response to osmotic stress|cytoplasm|Golgi apparatus|plant-type cell wall|cytosol|response to salt stress	-	-	-	-	NW_015456391.1:1069-2511	64.3959	349.6	2.44067	2.95331e-11	3.94711e-09	UP
107409192	LOC107409192	pleiotropic drug resistance protein 1	GO:0051179|GO:0016020|GO:0005623|GO:0005215|GO:0050896|GO:0003824|GO:0016787|GO:0031224|GO:0006950|GO:0071944|GO:0022857|GO:0005886|GO:0009725|GO:0016021|GO:0006810|GO:0006979|GO:0042493|GO:0055085|GO:0016817|GO:0006855|GO:0071702|GO:0009723|GO:0006811|GO:0015850|GO:0016818|GO:0009753|GO:0006869|GO:0015893|GO:0010193|GO:0016820|GO:0015399|GO:0009751|GO:0000302|GO:0015711|GO:0042626|GO:0006812|GO:…	localization|membrane|cell|transporter activity|response to stimulus|catalytic activity|hydrolase activity|intrinsic component of membrane|response to stress|cell periphery|transmembrane transporter activity|plasma membrane|response to hormone|integral component of membrane|transport|response to oxidative stress|response to drug|transmembrane transport|hydrolase activity, acting on acid anhydride…	-	-	-	-	chr1:42374971-42383747	0.255226	2.42653	3.24905	3.78447e-06	0.000132346	UP
107409232	LOC107409232	SPX domain-containing membrane protein At4g22990-like	GO:0051179|GO:0016020|GO:0005215|GO:0031224|GO:0022857|GO:0016021|GO:0006810|GO:0022891|GO:0055085	localization|membrane|transporter activity|intrinsic component of membrane|transmembrane transporter activity|integral component of membrane|transport|substrate-specific transmembrane transporter activity|transmembrane transport	-	-	-	-	NW_015456501.1:6-2327	9.4004	0.773999	-3.60232	2.09016e-07	1.0482e-05	DOWN
107409249	LOC107409249	basic 7S globulin-like	GO:0005576|GO:0016020|GO:0005623|GO:0030054|GO:0050896|GO:0006950|GO:0005622|GO:0009506|GO:0071944|GO:0005911|GO:0012505|GO:0005886|GO:0005618|GO:0043231|GO:0006970|GO:0005737|GO:0005794|GO:0009505|GO:0005829|GO:0009651	extracellular region|membrane|cell|cell junction|response to stimulus|response to stress|intracellular|plasmodesma|cell periphery|cell-cell junction|endomembrane system|plasma membrane|cell wall|intracellular membrane-bounded organelle|response to osmotic stress|cytoplasm|Golgi apparatus|plant-type cell wall|cytosol|response to salt stress	-	-	-	-	NW_015456529.1:449-1888	10.9951	48.5449	2.14246	9.96208e-07	4.11208e-05	UP
107409254	LOC107409254	uncharacterized LOC107409254	GO:0005576|GO:0005623|GO:0071944|GO:0005618|GO:0009505	extracellular region|cell|cell periphery|cell wall|plant-type cell wall	-	-	-	-	chr1:42271355-42275051	45.1485	0.318093	-7.14909	3.45624e-12	5.40666e-10	DOWN
107409301	LOC107409301	uncharacterized LOC107409301	GO:0005623|GO:0005622|GO:0005737	cell|intracellular|cytoplasm	-	-	-	-	chr1:42358091-42361321	3.83265	0.508775	-2.91324	0.000362261	0.00593677	DOWN
107409320	LOC107409320	mitogen-activated protein kinase kinase kinase NPK1-like	GO:0005623|GO:0023052|GO:0004871|GO:0050896|GO:0008152|GO:0003824|GO:0016740|GO:0006950|GO:0051716|GO:0005622|GO:0044237|GO:0044238|GO:0007165|GO:0043231|GO:0008219|GO:0043085|GO:0019538|GO:0023014|GO:0007049|GO:0051726|GO:0004702|GO:0050790|GO:0006793|GO:0016772|GO:0007154|GO:0016773|GO:0007346|GO:0051246|GO:0000165|GO:0000278|GO:0005634|GO:0016301|GO:0004709|GO:0044267|GO:0006796|GO:0032270|GO:…	cell|signaling|signal transducer activity|response to stimulus|metabolic process|catalytic activity|transferase activity|response to stress|cellular response to stimulus|intracellular|cellular metabolic process|primary metabolic process|signal transduction|intracellular membrane-bounded organelle|cell death|positive regulation of catalytic activity|protein metabolic process|signal transduction by…	-	-	-	-	NW_015456649.1:333-2009	1.94343	18.6875	3.2654	1.7177e-05	0.000465406	UP
107409328	LOC107409328	glutathione S-transferase L3-like	GO:0005623|GO:0050896|GO:0008152|GO:0003824|GO:0016740|GO:0005622|GO:0044237|GO:0006807|GO:0044238|GO:0019538|GO:0005737|GO:0016765|GO:0006790|GO:0006518|GO:0005829|GO:0006749|GO:0044267|GO:0010038|GO:0004364|GO:0046686|GO:0006464|GO:0010731	cell|response to stimulus|metabolic process|catalytic activity|transferase activity|intracellular|cellular metabolic process|nitrogen compound metabolic process|primary metabolic process|protein metabolic process|cytoplasm|transferase activity, transferring alkyl or aryl (other than methyl) groups|sulfur compound metabolic process|peptide metabolic process|cytosol|glutathione metabolic process|ce…	-	-	ko00480|ko01524|ko00982|ko00980	Glutathione metabolism|Platinum drug resistance|Drug metabolism - cytochrome P450|Metabolism of xenobiotics by cytochrome P450	NW_015456661.1:52-2260	20.2054	102.379	2.34111	5.42827e-06	0.000178556	UP
107409432	LOC107409432	putative glycine-rich cell wall structural protein 1	-	-	-	-	-	-	NW_015456841.1:1309-2097	7.4623	0.971568	-2.94123	0.000321109	0.00535692	DOWN
107409465	LOC107409465	tubulin alpha chain-like	GO:0005623|GO:0005198|GO:0005622|GO:0005874|GO:0007017|GO:0005856|GO:0007018|GO:0015630	cell|structural molecule activity|intracellular|microtubule|microtubule-based process|cytoskeleton|microtubule-based movement|microtubule cytoskeleton	-	-	ko04145|ko04210|ko04540	Phagosome|Apoptosis|Gap junction	NW_015456900.1:219-1064	285.568	43.3665	-2.71918	1.12932e-09	1.04337e-07	DOWN
107409476	LOC107409476	miraculin-like	GO:0005576|GO:0005623|GO:0008152|GO:0003824|GO:0016787|GO:0030234|GO:0071944|GO:0044238|GO:0048046|GO:0005618|GO:0008233|GO:0019538|GO:0004857|GO:0030414|GO:0006508|GO:0004866	extracellular region|cell|metabolic process|catalytic activity|hydrolase activity|enzyme regulator activity|cell periphery|primary metabolic process|apoplast|cell wall|peptidase activity|protein metabolic process|enzyme inhibitor activity|peptidase inhibitor activity|proteolysis|endopeptidase inhibitor activity	-	-	-	-	NW_015456919.1:110-1024	12.7816	136.687	3.41874	1.24867e-08	9.02318e-07	UP
107409493	LOC107409493	protein DETOXIFICATION 53-like	GO:0051179|GO:0016020|GO:0005623|GO:0005215|GO:0050896|GO:0031224|GO:0071944|GO:0022857|GO:0005886|GO:0016021|GO:0015238|GO:0006810|GO:0042493|GO:0055085|GO:0006855|GO:0015893	localization|membrane|cell|transporter activity|response to stimulus|intrinsic component of membrane|cell periphery|transmembrane transporter activity|plasma membrane|integral component of membrane|drug transmembrane transporter activity|transport|response to drug|transmembrane transport|drug transmembrane transport|drug transport	-	-	-	-	NW_015456949.1:501-2084	3.77566	0.492154	-2.93955	0.000156511	0.00297382	DOWN
107409560	LOC107409560	protein DETOXIFICATION 56-like	GO:0051179|GO:0016020|GO:0005623|GO:0005215|GO:0050896|GO:0051716|GO:0071944|GO:0022857|GO:0005886|GO:0005515|GO:0015238|GO:0006810|GO:0042493|GO:0070887|GO:0010119|GO:0055085|GO:0010118|GO:1990069|GO:0006855|GO:0015893|GO:0010037|GO:1902456|GO:0071244|GO:0015297	localization|membrane|cell|transporter activity|response to stimulus|cellular response to stimulus|cell periphery|transmembrane transporter activity|plasma membrane|protein binding|drug transmembrane transporter activity|transport|response to drug|cellular response to chemical stimulus|regulation of stomatal movement|transmembrane transport|stomatal movement|stomatal opening|drug transmembrane tr…	-	-	-	-	NW_015457087.1:607-2257	20.7675	1.66258	-3.64283	1.78883e-06	6.89777e-05	DOWN
107409584	LOC107409584	dirigent protein 25-like	GO:0005576	extracellular region	-	-	-	-	NW_015457142.1:28-2198	19.5628	0.730094	-4.74389	2.17228e-15	6.29548e-13	DOWN
107409630	LOC107409630	casparian strip membrane protein 3	GO:0016020|GO:0005623|GO:0031224|GO:0071554|GO:0071944|GO:0005886|GO:0005515|GO:0005618|GO:0016021|GO:0042802|GO:0046983|GO:0071555|GO:0009505|GO:0042803|GO:0042545|GO:0048226|GO:0007043	membrane|cell|intrinsic component of membrane|cell wall organization or biogenesis|cell periphery|plasma membrane|protein binding|cell wall|integral component of membrane|identical protein binding|protein dimerization activity|cell wall organization|plant-type cell wall|protein homodimerization activity|cell wall modification|Casparian strip|cell-cell junction assembly	-	-	-	-	chr2:497105-498142	15.475	0.117728	-7.03834	1.68039e-10	1.92769e-08	DOWN
107409645	LOC107409645	protein DETOXIFICATION 53-like	GO:0051179|GO:0016020|GO:0005623|GO:0005215|GO:0050896|GO:0031224|GO:0071944|GO:0022857|GO:0005886|GO:0016021|GO:0015238|GO:0006810|GO:0042493|GO:0055085|GO:0006855|GO:0015893	localization|membrane|cell|transporter activity|response to stimulus|intrinsic component of membrane|cell periphery|transmembrane transporter activity|plasma membrane|integral component of membrane|drug transmembrane transporter activity|transport|response to drug|transmembrane transport|drug transmembrane transport|drug transport	-	-	-	-	NW_015457257.1:7-2096	3.97783	0.804735	-2.3054	0.000690406	0.0100573	DOWN
107409707	LOC107409707	dirigent protein 22-like	GO:0005576|GO:0005623|GO:0050896|GO:0008152|GO:0006950|GO:0044237|GO:0071944|GO:0009058|GO:0048046|GO:0005618|GO:0006952|GO:0006725|GO:0019748|GO:0009698|GO:0019438|GO:0009699|GO:0044550|GO:0009807	extracellular region|cell|response to stimulus|metabolic process|response to stress|cellular metabolic process|cell periphery|biosynthetic process|apoplast|cell wall|defense response|cellular aromatic compound metabolic process|secondary metabolic process|phenylpropanoid metabolic process|aromatic compound biosynthetic process|phenylpropanoid biosynthetic process|secondary metabolite biosynthetic…	-	-	-	-	NW_015457396.1:841-1778	3.61936	25.2393	2.80187	2.7538e-06	0.000100421	UP
107409718	LOC107409718	gibberellin-regulated protein 1-like	GO:0032502|GO:0005576|GO:0005623|GO:0040007|GO:0023052|GO:0050896|GO:0051716|GO:0009653|GO:0071944|GO:0016049|GO:0048589|GO:0009725|GO:0060560|GO:0005618|GO:0007165|GO:0009826|GO:0070887|GO:0048869|GO:0007154|GO:0009505|GO:0009737|GO:0009755|GO:0000902|GO:0009739|GO:0009741|GO:0010476|GO:0071370|GO:0009740	developmental process|extracellular region|cell|growth|signaling|response to stimulus|cellular response to stimulus|anatomical structure morphogenesis|cell periphery|cell growth|developmental growth|response to hormone|developmental growth involved in morphogenesis|cell wall|signal transduction|unidimensional cell growth|cellular response to chemical stimulus|cellular developmental process|cell c…	-	-	-	-	NW_015457421.1:7-880	111.196	16.1591	-2.78269	3.89715e-10	4.15878e-08	DOWN
107409735	LOC107409735	GDSL esterase/lipase At1g74460-like	GO:0005576|GO:0008152|GO:0003824|GO:0016787|GO:0044238|GO:0016788|GO:0006629|GO:0052689|GO:0016042	extracellular region|metabolic process|catalytic activity|hydrolase activity|primary metabolic process|hydrolase activity, acting on ester bonds|lipid metabolic process|carboxylic ester hydrolase activity|lipid catabolic process	-	-	-	-	NW_015457447.1:264-1641	8.97725	41.2456	2.1999	4.21324e-06	0.000144457	UP
107409778	LOC107409778	uncharacterized protein DDB_G0271670-like	GO:0005623|GO:0005622|GO:0043231|GO:0005634	cell|intracellular|intracellular membrane-bounded organelle|nucleus	-	-	-	-	NW_015457500.1:8-1171	3.40739	0.248558	-3.77701	0.00046941	0.00739083	DOWN
107409779	LOC107409779	cadmium/zinc-transporting ATPase HMA2-like	GO:0051179|GO:0016020|GO:0005623|GO:0005215|GO:0003824|GO:0016787|GO:0031224|GO:0005622|GO:0071944|GO:0022857|GO:0005886|GO:0043231|GO:0016021|GO:0006810|GO:0022891|GO:0005887|GO:0055085|GO:0016817|GO:0031226|GO:0006811|GO:0015075|GO:0016818|GO:0034220|GO:0016820|GO:0015399|GO:0042626|GO:0006812|GO:0016462|GO:0008324|GO:0098655|GO:0017111|GO:0019829|GO:0016887|GO:0046873|GO:0015086|GO:0055069|GO:…	localization|membrane|cell|transporter activity|catalytic activity|hydrolase activity|intrinsic component of membrane|intracellular|cell periphery|transmembrane transporter activity|plasma membrane|intracellular membrane-bounded organelle|integral component of membrane|transport|substrate-specific transmembrane transporter activity|integral component of plasma membrane|transmembrane transport|hyd…	-	-	-	-	NW_015457501.1:7-1855	69.4908	10.9051	-2.67182	1.10406e-07	6.07438e-06	DOWN
107409780	LOC107409780	vinorine synthase-like	GO:0005623|GO:0050896|GO:0003824|GO:0016740|GO:0005622|GO:0009725|GO:0016746|GO:0005737|GO:0016747|GO:0009735	cell|response to stimulus|catalytic activity|transferase activity|intracellular|response to hormone|transferase activity, transferring acyl groups|cytoplasm|transferase activity, transferring acyl groups other than amino-acyl groups|response to cytokinin	-	-	-	-	NW_015457502.1:448-1788	21.3518	2.51021	-3.08848	5.87467e-10	5.90297e-08	DOWN
107409817	LOC107409817	uncharacterized LOC107409817	GO:0005576|GO:0050896|GO:0006950|GO:0006952	extracellular region|response to stimulus|response to stress|defense response	-	-	-	-	NW_015457548.1:663-1566	0.121301	6.48438	5.7403	1.15217e-07	6.29397e-06	UP
107409847	LOC107409847	ethylene-responsive transcription factor ABR1-like	GO:0005623|GO:0023052|GO:0050896|GO:0008152|GO:0003700|GO:0006950|GO:0051716|GO:0005622|GO:0044237|GO:0009607|GO:0009058|GO:0006807|GO:0051707|GO:0044238|GO:0009725|GO:0009620|GO:0007165|GO:0043231|GO:0006970|GO:0006952|GO:0003676|GO:0006139|GO:0006725|GO:0070887|GO:0009968|GO:0007154|GO:0009966|GO:0009723|GO:0009737|GO:0009788|GO:0019438|GO:0010467|GO:0005634|GO:0003677|GO:0009743|GO:0010468|GO:…	cell|signaling|response to stimulus|metabolic process|transcription factor activity, sequence-specific DNA binding|response to stress|cellular response to stimulus|intracellular|cellular metabolic process|response to biotic stimulus|biosynthetic process|nitrogen compound metabolic process|response to other organism|primary metabolic process|response to hormone|response to fungus|signal transducti…	-	-	-	-	NW_015457584.1:11-1707	7.92078	42.8246	2.43472	3.59175e-06	0.000126617	UP
107409852	LOC107409852	uncharacterized protein DDB_G0271670-like	GO:0005623|GO:0005622|GO:0043231|GO:0005634	cell|intracellular|intracellular membrane-bounded organelle|nucleus	-	-	-	-	chr2:267551-269075	0.875005	0.0459784	-4.25026	0.00448377	0.043013	DOWN
107409917	LOC107409917	alpha-amylase-like	GO:0005576|GO:0050896|GO:0008152|GO:0003824|GO:0016787|GO:0044238|GO:0048046|GO:0009725|GO:0043169|GO:0016798|GO:0005975|GO:0009737|GO:0046872|GO:0009739|GO:0004553|GO:0005509|GO:0004556	extracellular region|response to stimulus|metabolic process|catalytic activity|hydrolase activity|primary metabolic process|apoplast|response to hormone|cation binding|hydrolase activity, acting on glycosyl bonds|carbohydrate metabolic process|response to abscisic acid|metal ion binding|response to gibberellin|hydrolase activity, hydrolyzing O-glycosyl compounds|calcium ion binding|alpha-amylase …	-	-	ko01100|ko00500	Metabolic pathways|Starch and sucrose metabolism	NW_015457665.1:660-1594	0.571353	23.5433	5.36479	1.28518e-08	9.19057e-07	UP
107409929	LOC107409929	uncharacterized LOC107409929	GO:0016020|GO:0005623|GO:0008152|GO:0003824|GO:0016740|GO:0031224|GO:0005622|GO:0044237|GO:0009058|GO:0012505|GO:0044238|GO:0043231|GO:0016021|GO:0019538|GO:0016757|GO:0005737|GO:1901135|GO:0006486|GO:0005975|GO:0005794|GO:0044267|GO:0016758|GO:0008378|GO:0006464	membrane|cell|metabolic process|catalytic activity|transferase activity|intrinsic component of membrane|intracellular|cellular metabolic process|biosynthetic process|endomembrane system|primary metabolic process|intracellular membrane-bounded organelle|integral component of membrane|protein metabolic process|transferase activity, transferring glycosyl groups|cytoplasm|carbohydrate derivative meta…	-	-	-	-	NW_015457682.1:5-1410	0.52736	5.20083	3.30188	5.36362e-05	0.00122447	UP
107409932	LOC107409932	probable LRR receptor-like serine/threonine-protein kinase At1g07650	GO:0016020|GO:0005623|GO:0030054|GO:0023052|GO:0004871|GO:0050896|GO:0008152|GO:0003824|GO:0016740|GO:0051716|GO:0044237|GO:0004872|GO:0009506|GO:0071944|GO:0005911|GO:0038023|GO:0044238|GO:0005886|GO:0005515|GO:0009725|GO:0004888|GO:0019899|GO:0007165|GO:0019538|GO:0070887|GO:0006793|GO:0001653|GO:0016772|GO:0007154|GO:0016773|GO:0019199|GO:0016301|GO:0007166|GO:0044267|GO:0006796|GO:0009755|GO:…	membrane|cell|cell junction|signaling|signal transducer activity|response to stimulus|metabolic process|catalytic activity|transferase activity|cellular response to stimulus|cellular metabolic process|receptor activity|plasmodesma|cell periphery|cell-cell junction|signaling receptor activity|primary metabolic process|plasma membrane|protein binding|response to hormone|transmembrane signaling rece…	-	-	-	-	NW_015457684.1:864-1562	2.39201	33.1656	3.79339	2.35718e-08	1.55258e-06	UP
107409966	LOC107409966	uncharacterized LOC107409966	GO:0005623|GO:0005622|GO:0043231|GO:0005737|GO:0005739	cell|intracellular|intracellular membrane-bounded organelle|cytoplasm|mitochondrion	-	-	-	-	NW_015457728.1:135-764	4.48263	0.657992	-2.7682	0.0027698	0.0299052	DOWN
107409974	LOC107409974	uncharacterized N-acetyltransferase p20-like	-	-	-	-	-	-	NW_015457740.1:37-1482	0.113751	1.11253	3.28989	0.00448691	0.0430281	UP
107409978	LOC107409978	probably inactive leucine-rich repeat receptor-like protein kinase At3g28040	GO:0016020|GO:0005623|GO:0023052|GO:0050896|GO:0008152|GO:0003824|GO:0016740|GO:0051716|GO:0044237|GO:0071944|GO:0044238|GO:0005886|GO:0007165|GO:0019538|GO:0006793|GO:0016772|GO:0007154|GO:0000166|GO:0016773|GO:0017076|GO:0016301|GO:0007166|GO:0044267|GO:0006796|GO:0005524|GO:0006464|GO:0016310|GO:0004672|GO:0030554|GO:0006468|GO:0004674|GO:0007169	membrane|cell|signaling|response to stimulus|metabolic process|catalytic activity|transferase activity|cellular response to stimulus|cellular metabolic process|cell periphery|primary metabolic process|plasma membrane|signal transduction|protein metabolic process|phosphorus metabolic process|transferase activity, transferring phosphorus-containing groups|cell communication|nucleotide binding|phosp…	-	-	-	-	NW_015457747.1:224-1431	1.13387	5.52914	2.2858	0.00401354	0.0396914	UP
107409991	LOC107409991	GDSL esterase/lipase CPRD49-like	GO:0005576|GO:0008152|GO:0003824|GO:0016787|GO:0044238|GO:0048046|GO:0016788|GO:0006629|GO:0052689|GO:0016042	extracellular region|metabolic process|catalytic activity|hydrolase activity|primary metabolic process|apoplast|hydrolase activity, acting on ester bonds|lipid metabolic process|carboxylic ester hydrolase activity|lipid catabolic process	-	-	-	-	NW_015457763.1:1-1319	9.11331	1.11268	-3.03394	0.00014065	0.00273088	DOWN
107409998	LOC107409998	LRR receptor-like serine/threonine-protein kinase EFR	GO:0051179|GO:0016020|GO:0005623|GO:0023052|GO:0004871|GO:0050896|GO:0008152|GO:0003824|GO:0016740|GO:0006950|GO:0051716|GO:0044237|GO:0004872|GO:0071944|GO:0009607|GO:0051707|GO:0038023|GO:0044238|GO:0006955|GO:0005886|GO:0005515|GO:0004888|GO:0007165|GO:0008219|GO:0031349|GO:0019538|GO:0050776|GO:0006952|GO:0006810|GO:0006793|GO:0055085|GO:0009617|GO:0045087|GO:0016772|GO:0007154|GO:0000166|GO:…	localization|membrane|cell|signaling|signal transducer activity|response to stimulus|metabolic process|catalytic activity|transferase activity|response to stress|cellular response to stimulus|cellular metabolic process|receptor activity|cell periphery|response to biotic stimulus|response to other organism|signaling receptor activity|primary metabolic process|immune response|plasma membrane|protei…	-	-	-	-	chr2:326660-329049	8.02093	1.51421	-2.40521	1.00721e-05	0.000294693	DOWN
107410016	LOC107410016	RNA-dependent RNA polymerase 1-like	GO:0005623|GO:0050896|GO:0008152|GO:0003824|GO:0016740|GO:0005622|GO:0009892|GO:0044237|GO:0009607|GO:0010166|GO:0009058|GO:0006807|GO:0051707|GO:0044238|GO:0009615|GO:0043231|GO:0003676|GO:0006139|GO:0006725|GO:0060148|GO:0016458|GO:0010025|GO:0016772|GO:0060968|GO:0019438|GO:0010467|GO:0005634|GO:0016441|GO:0010468|GO:0016779|GO:0003723|GO:0009751|GO:0010629|GO:0016070|GO:0040029|GO:0032774|GO:…	cell|response to stimulus|metabolic process|catalytic activity|transferase activity|intracellular|negative regulation of metabolic process|cellular metabolic process|response to biotic stimulus|wax metabolic process|biosynthetic process|nitrogen compound metabolic process|response to other organism|primary metabolic process|response to virus|intracellular membrane-bounded organelle|nucleic acid b…	-	-	-	-	NW_015457794.1:9-682	0.807707	9.54521	3.56287	0.000111493	0.00224388	UP
107410022	LOC107410022	exocyst complex component EXO70B1-like	GO:0051179|GO:0005623|GO:0005622|GO:0071944|GO:0043234|GO:0043231|GO:0006810|GO:0005737|GO:0032940|GO:0005938|GO:0000145|GO:0006887|GO:0005829|GO:0005634|GO:0016192|GO:0048278|GO:0006904	localization|cell|intracellular|cell periphery|protein complex|intracellular membrane-bounded organelle|transport|cytoplasm|secretion by cell|cell cortex|exocyst|exocytosis|cytosol|nucleus|vesicle-mediated transport|vesicle docking|vesicle docking involved in exocytosis	-	-	-	-	NW_015457807.1:4-1242	3.49152	23.244	2.73493	1.99212e-08	1.33124e-06	UP
107410031	LOC107410031	uncharacterized LOC107410031	-	-	-	-	-	-	NW_015457828.1:432-1350	5.91499	0.465303	-3.66813	1.57309e-05	0.000432952	DOWN
107410103	LOC107410103	piriformospora indica-insensitive protein 2-like	GO:0032502|GO:0016020|GO:0005623|GO:0000003|GO:0040007|GO:0023052|GO:0050896|GO:0003006|GO:0031224|GO:0051716|GO:0009653|GO:0071944|GO:0016049|GO:0048589|GO:0005886|GO:0005515|GO:0045177|GO:0060560|GO:0009856|GO:0007165|GO:0009826|GO:0016324|GO:0009860|GO:0031225|GO:0048869|GO:0007154|GO:0048868|GO:0000904|GO:0009932|GO:0030154|GO:0000902	developmental process|membrane|cell|reproduction|growth|signaling|response to stimulus|developmental process involved in reproduction|intrinsic component of membrane|cellular response to stimulus|anatomical structure morphogenesis|cell periphery|cell growth|developmental growth|plasma membrane|protein binding|apical part of cell|developmental growth involved in morphogenesis|pollination|signal tr…	-	-	-	-	NW_015457949.1:63-1223	0.198145	3.2931	4.05481	0.000454177	0.007191	UP
107410113	LOC107410113	probable LRR receptor-like serine/threonine-protein kinase At3g47570	GO:0016020|GO:0005623|GO:0023052|GO:0050896|GO:0008152|GO:0003824|GO:0016740|GO:0051716|GO:0044237|GO:0071944|GO:0044238|GO:0005886|GO:0007165|GO:0019538|GO:0006793|GO:0016772|GO:0007154|GO:0000166|GO:0016773|GO:0017076|GO:0016301|GO:0007166|GO:0044267|GO:0006796|GO:0005524|GO:0006464|GO:0016310|GO:0004672|GO:0030554|GO:0006468|GO:0004674|GO:0007169	membrane|cell|signaling|response to stimulus|metabolic process|catalytic activity|transferase activity|cellular response to stimulus|cellular metabolic process|cell periphery|primary metabolic process|plasma membrane|signal transduction|protein metabolic process|phosphorus metabolic process|transferase activity, transferring phosphorus-containing groups|cell communication|nucleotide binding|phosp…	-	-	-	-	chr2:333864-335586	5.80165	1.07195	-2.43622	0.000255248	0.00447897	DOWN
107410146	LOC107410146	(RS)-norcoclaurine 6-O-methyltransferase-like	GO:0005623|GO:0008152|GO:0003824|GO:0032259|GO:0016740|GO:0005622|GO:0044237|GO:0009058|GO:0043231|GO:0006725|GO:0005737|GO:0008168|GO:0005829|GO:0019438|GO:0005634|GO:0008757|GO:0008171	cell|metabolic process|catalytic activity|methylation|transferase activity|intracellular|cellular metabolic process|biosynthetic process|intracellular membrane-bounded organelle|cellular aromatic compound metabolic process|cytoplasm|methyltransferase activity|cytosol|aromatic compound biosynthetic process|nucleus|S-adenosylmethionine-dependent methyltransferase activity|O-methyltransferase activi…	-	-	-	-	NW_015458033.1:130-976	43.3402	5.03406	-3.10591	1.26189e-08	9.07649e-07	DOWN
107410155	LOC107410155	uncharacterized LOC107410155	GO:0005576|GO:0050896|GO:0006950|GO:0006952	extracellular region|response to stimulus|response to stress|defense response	-	-	-	-	NW_015458047.1:300-1062	1.00609	32.9493	5.03341	2.84204e-08	1.8197e-06	UP
107410159	LOC107410159	protein NUCLEAR FUSION DEFECTIVE 4	GO:0005623|GO:0005622|GO:0043231|GO:0005737|GO:0009536|GO:0009507	cell|intracellular|intracellular membrane-bounded organelle|cytoplasm|plastid|chloroplast	-	-	-	-	NW_015458053.1:5-1097	0.131492	2.69559	4.35755	0.000510091	0.00788347	UP
107410224	LOC107410224	aluminum-activated malate transporter 2-like	-	-	-	-	-	-	chr2:668301-671096	2.74698	0.242909	-3.49936	0.000489051	0.00764164	DOWN
107410248	LOC107410248	cationic peroxidase 2-like	GO:0005576|GO:0016020|GO:0005623|GO:0030054|GO:0016209|GO:0050896|GO:0008152|GO:0003824|GO:0016491|GO:0004601|GO:0006950|GO:0071554|GO:0044237|GO:0009506|GO:0071944|GO:0009607|GO:0005911|GO:0051707|GO:0048046|GO:0045730|GO:0009620|GO:0005618|GO:0046906|GO:0006952|GO:0043169|GO:0006725|GO:0071669|GO:0019748|GO:0071555|GO:0009698|GO:0009505|GO:0009808|GO:0009664|GO:0046872|GO:0050832|GO:0020037	extracellular region|membrane|cell|cell junction|antioxidant activity|response to stimulus|metabolic process|catalytic activity|oxidoreductase activity|peroxidase activity|response to stress|cell wall organization or biogenesis|cellular metabolic process|plasmodesma|cell periphery|response to biotic stimulus|cell-cell junction|response to other organism|apoplast|respiratory burst|response to fung…	-	-	ko01100|ko01110|ko00940	Metabolic pathways|Biosynthesis of secondary metabolites|Phenylpropanoid biosynthesis	chr2:905339-906117	20.6341	1.09706	-4.23332	2.08674e-09	1.78696e-07	DOWN
107410255	LOC107410255	peroxidase N1-like	GO:0005576|GO:0016020|GO:0005623|GO:0030054|GO:0016209|GO:0050896|GO:0008152|GO:0003824|GO:0016491|GO:0004601|GO:0006950|GO:0071554|GO:0044237|GO:0009506|GO:0071944|GO:0009607|GO:0005911|GO:0051707|GO:0048046|GO:0045730|GO:0009620|GO:0005618|GO:0046906|GO:0006952|GO:0043169|GO:0006725|GO:0071669|GO:0019748|GO:0071555|GO:0009698|GO:0009505|GO:0009808|GO:0009664|GO:0046872|GO:0050832|GO:0020037	extracellular region|membrane|cell|cell junction|antioxidant activity|response to stimulus|metabolic process|catalytic activity|oxidoreductase activity|peroxidase activity|response to stress|cell wall organization or biogenesis|cellular metabolic process|plasmodesma|cell periphery|response to biotic stimulus|cell-cell junction|response to other organism|apoplast|respiratory burst|response to fung…	-	-	ko01100|ko01110|ko00940	Metabolic pathways|Biosynthesis of secondary metabolites|Phenylpropanoid biosynthesis	chr2:897135-898737	47.99	4.3926	-3.44959	5.48105e-15	1.4941e-12	DOWN
107410256	LOC107410256	E3 ubiquitin-protein ligase PUB23-like	GO:0005623|GO:0050896|GO:0008152|GO:0003824|GO:0016740|GO:0006950|GO:0005622|GO:0044237|GO:0016874|GO:0044238|GO:0045730|GO:0019538|GO:0002679|GO:0006952|GO:0005737|GO:0009415|GO:0009414|GO:0019787|GO:0005829|GO:0004842|GO:0044267|GO:0010200|GO:0006464|GO:0070647|GO:0016567|GO:0051865	cell|response to stimulus|metabolic process|catalytic activity|transferase activity|response to stress|intracellular|cellular metabolic process|ligase activity|primary metabolic process|respiratory burst|protein metabolic process|respiratory burst involved in defense response|defense response|cytoplasm|response to water|response to water deprivation|ubiquitin-like protein transferase activity|cyt…	-	-	-	-	chr2:754301-755726	10.6743	0.853947	-3.64385	1.5946e-08	1.10382e-06	DOWN
107410272	LOC107410272	LRR receptor-like serine/threonine-protein kinase FLS2	GO:0023052|GO:0050896|GO:0003824|GO:0016740|GO:0006950|GO:0051716|GO:0007165|GO:0006952|GO:0016772|GO:0007154|GO:0016301	signaling|response to stimulus|catalytic activity|transferase activity|response to stress|cellular response to stimulus|signal transduction|defense response|transferase activity, transferring phosphorus-containing groups|cell communication|kinase activity	-	-	-	-	chr2:1047661-1050534	0.364954	2.71131	2.8932	0.00179094	0.0212353	UP
107410326	LOC107410326	23 kDa jasmonate-induced protein-like	-	-	-	-	-	-	chr2:1570606-1571690	3.23151	0.435894	-2.89016	0.00324576	0.0337598	DOWN
107410358	LOC107410358	indole-3-acetaldehyde oxidase-like	GO:0005623|GO:0008152|GO:0003824|GO:0016491|GO:0005622|GO:0044237|GO:0009058|GO:0051536|GO:0016614|GO:0043231|GO:0005737|GO:0055114|GO:0009850|GO:0005829|GO:0051537|GO:0009851|GO:0009536|GO:0004031|GO:0009507|GO:0050302	cell|metabolic process|catalytic activity|oxidoreductase activity|intracellular|cellular metabolic process|biosynthetic process|iron-sulfur cluster binding|oxidoreductase activity, acting on CH-OH group of donors|intracellular membrane-bounded organelle|cytoplasm|oxidation-reduction process|auxin metabolic process|cytosol|2 iron, 2 sulfur cluster binding|auxin biosynthetic process|plastid|aldehyd…	-	-	ko00380	Tryptophan metabolism	chr2:1853676-1860408	4.46513	18.7851	2.07282	7.25769e-07	3.11244e-05	UP
107410361	LOC107410361	ribonuclease 3-like protein 2	GO:0005623|GO:0008152|GO:0003824|GO:0016787|GO:0005622|GO:0044237|GO:0006807|GO:0044238|GO:0043231|GO:0043169|GO:0003676|GO:0006139|GO:0006725|GO:0016788|GO:0005737|GO:0042254|GO:0010467|GO:0005634|GO:0004518|GO:0046872|GO:0003723|GO:0016070|GO:0004519|GO:0003725|GO:0090305|GO:0006396|GO:0006364|GO:0090501|GO:0004540|GO:0004521|GO:0090502|GO:0034470|GO:0004525|GO:0016891	cell|metabolic process|catalytic activity|hydrolase activity|intracellular|cellular metabolic process|nitrogen compound metabolic process|primary metabolic process|intracellular membrane-bounded organelle|cation binding|nucleic acid binding|nucleobase-containing compound metabolic process|cellular aromatic compound metabolic process|hydrolase activity, acting on ester bonds|cytoplasm|ribosome bio…	-	-	-	-	chr2:1851092-1851986	0.409586	3.3726	3.04162	0.00227259	0.0256745	UP
107410410	LOC107410410	protein kinase 2B, chloroplastic-like	GO:0016020|GO:0005623|GO:0003824|GO:0016740|GO:0005622|GO:0071944|GO:0005886|GO:0043231|GO:0005737|GO:0016772|GO:0005634|GO:0016301|GO:0009536|GO:0009507	membrane|cell|catalytic activity|transferase activity|intracellular|cell periphery|plasma membrane|intracellular membrane-bounded organelle|cytoplasm|transferase activity, transferring phosphorus-containing groups|nucleus|kinase activity|plastid|chloroplast	-	-	ko04064	NF-kappa B signaling pathway	chr2:2211620-2213917	5.79622	1.039	-2.47992	0.000967436	0.0129866	DOWN
107410434	LOC107410434	uncharacterized LOC107410434	-	-	-	-	-	-	chr2:2152020-2154034	2.21905	0.319847	-2.79449	0.00077771	0.0110257	DOWN
107410493	LOC107410493	uncharacterized LOC107410493	GO:0005623|GO:0005622|GO:0043231|GO:0005634	cell|intracellular|intracellular membrane-bounded organelle|nucleus	-	-	-	-	chr2:3388527-3390404	54.4043	0.336048	-7.33891	7.35793e-11	9.04369e-09	DOWN
107410498	LOC107410498	probable disease resistance protein At4g27220	GO:0005623|GO:0050896|GO:0006950|GO:0005622|GO:0043231|GO:0006952|GO:0005737|GO:0000166|GO:0017076|GO:0043531|GO:0005739|GO:0005524|GO:0030554	cell|response to stimulus|response to stress|intracellular|intracellular membrane-bounded organelle|defense response|cytoplasm|nucleotide binding|purine nucleotide binding|ADP binding|mitochondrion|ATP binding|adenyl nucleotide binding	-	-	-	-	chr2:3517340-3520239	3.59615	0.342285	-3.39318	6.11904e-06	0.000196689	DOWN
107410500	LOC107410500	uncharacterized LOC107410500	GO:0005623|GO:0050896|GO:0006950|GO:0005622|GO:0043231|GO:0006952|GO:0005737|GO:0000166|GO:0017076|GO:0043531|GO:0005739|GO:0005524|GO:0030554	cell|response to stimulus|response to stress|intracellular|intracellular membrane-bounded organelle|defense response|cytoplasm|nucleotide binding|purine nucleotide binding|ADP binding|mitochondrion|ATP binding|adenyl nucleotide binding	-	-	-	-	chr2:3546215-3551721	1.35915	0.339644	-2.00061	0.00287039	0.0307979	DOWN
107410503	LOC107410503	cytochrome P450 714C2-like	GO:0016020|GO:0005623|GO:0008152|GO:0042175|GO:0031090|GO:0019825|GO:0031224|GO:0005622|GO:0005789|GO:0012505|GO:0098588|GO:0043231|GO:0016021|GO:0005737|GO:0055114|GO:0005783	membrane|cell|metabolic process|nuclear outer membrane-endoplasmic reticulum membrane network|organelle membrane|oxygen binding|intrinsic component of membrane|intracellular|endoplasmic reticulum membrane|endomembrane system|bounding membrane of organelle|intracellular membrane-bounded organelle|integral component of membrane|cytoplasm|oxidation-reduction process|endoplasmic reticulum	-	-	-	-	chr1:4248253-4249273	6.35646	0.0947138	-6.0685	3.06912e-06	0.000110601	DOWN
107410511	LOC107410511	vacuolar-processing enzyme alpha-isozyme-like	GO:0005576|GO:0005623|GO:0008152|GO:0003824|GO:0016787|GO:0005622|GO:0044237|GO:0044238|GO:0043233|GO:0008233|GO:0043231|GO:0019538|GO:0005737|GO:0051604|GO:0006508|GO:0010467|GO:0005773|GO:0005775|GO:0044267|GO:0030163|GO:0051603|GO:0016485|GO:0004175|GO:0008234|GO:0006624|GO:0043202|GO:0044257|GO:0000323|GO:0004197|GO:0005764	extracellular region|cell|metabolic process|catalytic activity|hydrolase activity|intracellular|cellular metabolic process|primary metabolic process|organelle lumen|peptidase activity|intracellular membrane-bounded organelle|protein metabolic process|cytoplasm|protein maturation|proteolysis|gene expression|vacuole|vacuolar lumen|cellular protein metabolic process|protein catabolic process|proteol…	-	-	ko04142	Lysosome	chr2:3114055-3116677	34.142	137.456	2.00935	1.36155e-08	9.63658e-07	UP
107410513	LOC107410513	cytochrome P450 714B3-like	GO:0003824|GO:0016491|GO:0004497	catalytic activity|oxidoreductase activity|monooxygenase activity	-	-	-	-	chr1:4249434-4250434	3.51048	0.0933979	-5.23214	0.00021839	0.00391198	DOWN
107410577	LOC107410577	protein argonaute 5-like	GO:0005623|GO:0050896|GO:0008152|GO:0044419|GO:0006950|GO:0005622|GO:0009892|GO:0009607|GO:0051707|GO:0006955|GO:0009615|GO:0051607|GO:0006952|GO:0003676|GO:0005737|GO:0051701|GO:0016458|GO:0045087|GO:0044403|GO:0009814|GO:0005829|GO:0010467|GO:0098586|GO:0016441|GO:0010468|GO:0003723|GO:0010629|GO:0009616|GO:0040029|GO:0060145|GO:0010608	cell|response to stimulus|metabolic process|interspecies interaction between organisms|response to stress|intracellular|negative regulation of metabolic process|response to biotic stimulus|response to other organism|immune response|response to virus|defense response to virus|defense response|nucleic acid binding|cytoplasm|interaction with host|gene silencing|innate immune response|symbiosis, enco…	-	-	-	-	chr2:4473532-4479281	0.85413	5.1593	2.59465	1.83798e-06	7.03799e-05	UP
107410582	LOC107410582	patatin-like protein 3	GO:0032502|GO:0016020|GO:0005623|GO:0045735|GO:0050896|GO:0008152|GO:0003824|GO:0016787|GO:0006950|GO:0009653|GO:0005622|GO:0044238|GO:0009791|GO:0043231|GO:0007275|GO:0048569|GO:0006952|GO:0016788|GO:0005737|GO:0010015|GO:0009886|GO:0006629|GO:0010311|GO:0048364|GO:0048513|GO:0016298|GO:0052689|GO:0016042|GO:0009536|GO:0048528|GO:0022622|GO:0010102|GO:0048527|GO:0047372|GO:0004620|GO:0009507	developmental process|membrane|cell|nutrient reservoir activity|response to stimulus|metabolic process|catalytic activity|hydrolase activity|response to stress|anatomical structure morphogenesis|intracellular|primary metabolic process|post-embryonic development|intracellular membrane-bounded organelle|multicellular organism development|post-embryonic organ development|defense response|hydrolase a…	-	-	-	-	chr2:4591406-4593169	59.5823	1.45073	-5.36003	4.09436e-18	1.73425e-15	DOWN
107410595	LOC107410595	patatin-like protein 2	GO:0016020|GO:0005623|GO:0045735|GO:0050896|GO:0008152|GO:0003824|GO:0016787|GO:0006950|GO:0051716|GO:0005622|GO:0044237|GO:0009607|GO:0009058|GO:0051707|GO:0044238|GO:0006955|GO:0009615|GO:0070482|GO:0001666|GO:0043231|GO:0008219|GO:0044281|GO:0051607|GO:0006952|GO:0016788|GO:0005737|GO:0070887|GO:0044255|GO:0006629|GO:0045087|GO:0016298|GO:0006631|GO:0052689|GO:0016042|GO:0009626|GO:0010038|GO:…	membrane|cell|nutrient reservoir activity|response to stimulus|metabolic process|catalytic activity|hydrolase activity|response to stress|cellular response to stimulus|intracellular|cellular metabolic process|response to biotic stimulus|biosynthetic process|response to other organism|primary metabolic process|immune response|response to virus|response to oxygen levels|response to hypoxia|intracel…	-	-	-	-	chr2:4596474-4597307	24.5538	1.79799	-3.77149	1.88028e-08	1.27194e-06	DOWN
107410598	LOC107410598	GABA transporter 1-like	GO:0051179|GO:0005215|GO:0022857|GO:0006810|GO:0022891|GO:0055085|GO:0071702|GO:0006811|GO:0015075|GO:0005342|GO:0034220|GO:1903825|GO:0015711|GO:0008509|GO:0098656|GO:0006865|GO:0006820|GO:0003333|GO:0015171|GO:0008514	localization|transporter activity|transmembrane transporter activity|transport|substrate-specific transmembrane transporter activity|transmembrane transport|organic substance transport|ion transport|ion transmembrane transporter activity|organic acid transmembrane transporter activity|ion transmembrane transport|organic acid transmembrane transport|organic anion transport|anion transmembrane tran…	-	-	-	-	chr2:4324037-4329507	0.762698	8.72655	3.51623	3.24392e-06	0.000115689	UP
107410616	LOC107410616	putative glycine-rich cell wall structural protein 1	-	-	-	-	-	-	chr2:4958795-4959652	13.1148	2.7492	-2.25412	0.00531847	0.0491207	DOWN
107410617	LOC107410617	L-ascorbate oxidase homolog	GO:0005576|GO:0016020|GO:0005623|GO:0030054|GO:0008152|GO:0003824|GO:0016491|GO:0009506|GO:0071944|GO:0005911|GO:0005618|GO:0043169|GO:0055114|GO:0009505|GO:0046872|GO:0046914|GO:0005507	extracellular region|membrane|cell|cell junction|metabolic process|catalytic activity|oxidoreductase activity|plasmodesma|cell periphery|cell-cell junction|cell wall|cation binding|oxidation-reduction process|plant-type cell wall|metal ion binding|transition metal ion binding|copper ion binding	-	-	-	-	chr2:4961934-4967394	12.8557	1.40248	-3.19636	2.86981e-09	2.35855e-07	DOWN
107410628	LOC107410628	disease resistance protein At4g27190-like	GO:0005623|GO:0050896|GO:0006950|GO:0005622|GO:0043231|GO:0006952|GO:0000166|GO:0017076|GO:0005634|GO:0043531|GO:0005524|GO:0030554	cell|response to stimulus|response to stress|intracellular|intracellular membrane-bounded organelle|defense response|nucleotide binding|purine nucleotide binding|nucleus|ADP binding|ATP binding|adenyl nucleotide binding	-	-	-	-	chr2:4735183-4749143	0.2587	1.19944	2.21301	0.00322486	0.0335932	UP
107410661	LOC107410661	beta-hexosaminidase 3	GO:0016020|GO:0005623|GO:0008152|GO:0003824|GO:0016787|GO:0071944|GO:0044238|GO:0005886|GO:0005618|GO:0016798|GO:0005975|GO:0009505|GO:0004553|GO:0015929|GO:0004563	membrane|cell|metabolic process|catalytic activity|hydrolase activity|cell periphery|primary metabolic process|plasma membrane|cell wall|hydrolase activity, acting on glycosyl bonds|carbohydrate metabolic process|plant-type cell wall|hydrolase activity, hydrolyzing O-glycosyl compounds|hexosaminidase activity|beta-N-acetylhexosaminidase activity	-	-	ko01100|ko00520|ko04142|ko00511|ko00531|ko00603|ko00604	Metabolic pathways|Amino sugar and nucleotide sugar metabolism|Lysosome|Other glycan degradation|Glycosaminoglycan degradation|Glycosphingolipid biosynthesis - globo series|Glycosphingolipid biosynthesis - ganglio series	chr2:5401491-5406612	61.9046	15.3839	-2.00863	1.04628e-06	4.29303e-05	DOWN
107410698	LOC107410698	protein CHUP1, chloroplastic	GO:0016020|GO:0005623|GO:0019867|GO:0031090|GO:0005622|GO:0098588|GO:0043231|GO:0005737|GO:0042170|GO:0009527|GO:0031969|GO:0009526|GO:0009657|GO:0009536|GO:0009707|GO:0009658|GO:0009507|GO:0009941	membrane|cell|outer membrane|organelle membrane|intracellular|bounding membrane of organelle|intracellular membrane-bounded organelle|cytoplasm|plastid membrane|plastid outer membrane|chloroplast membrane|plastid envelope|plastid organization|plastid|chloroplast outer membrane|chloroplast organization|chloroplast|chloroplast envelope	-	-	-	-	chr1:4086179-4089934	9.02805	1.77894	-2.3434	9.89638e-06	0.000291097	DOWN
107410701	LOC107410701	non-specific phospholipase C2	GO:0005576|GO:0016020|GO:0005623|GO:0008152|GO:0003824|GO:0016787|GO:0071944|GO:0005886|GO:0016788	extracellular region|membrane|cell|metabolic process|catalytic activity|hydrolase activity|cell periphery|plasma membrane|hydrolase activity, acting on ester bonds	-	-	ko01100|ko01110|ko00564|ko00562|ko00565	Metabolic pathways|Biosynthesis of secondary metabolites|Glycerophospholipid metabolism|Inositol phosphate metabolism|Ether lipid metabolism	chr2:5992278-5996820	5.24757	22.4099	2.09442	4.03599e-06	0.000139597	UP
107410725	LOC107410725	uncharacterized LOC107410725	-	-	-	-	-	-	chr2:6104110-6108039	0.174776	1.54798	3.14681	0.00406992	0.0400476	UP
107410779	LOC107410779	BURP domain-containing protein 3-like	GO:0005576|GO:0005623|GO:0045735|GO:0050896|GO:0006950|GO:0005622|GO:0012505|GO:0009725|GO:0005768|GO:0043231|GO:0006970|GO:0005737|GO:0009415|GO:0009414|GO:0005794|GO:0009737|GO:0009269|GO:0009651|GO:0005802	extracellular region|cell|nutrient reservoir activity|response to stimulus|response to stress|intracellular|endomembrane system|response to hormone|endosome|intracellular membrane-bounded organelle|response to osmotic stress|cytoplasm|response to water|response to water deprivation|Golgi apparatus|response to abscisic acid|response to desiccation|response to salt stress|trans-Golgi network	-	-	-	-	chr2:6256475-6258327	22.4226	138.37	2.62551	4.54167e-08	2.78489e-06	UP
107410786	LOC107410786	phosphoinositide phospholipase C 4-like	GO:0016020|GO:0005623|GO:0023052|GO:0004871|GO:0050896|GO:0008152|GO:0003824|GO:0016787|GO:0051716|GO:0005622|GO:0071944|GO:0044238|GO:0005886|GO:0007165|GO:0043169|GO:0016788|GO:0005737|GO:0006629|GO:0007154|GO:0016298|GO:0005829|GO:0042578|GO:0016042|GO:0046872|GO:0035556|GO:0005509|GO:0008081|GO:0004620|GO:0004629|GO:0004435	membrane|cell|signaling|signal transducer activity|response to stimulus|metabolic process|catalytic activity|hydrolase activity|cellular response to stimulus|intracellular|cell periphery|primary metabolic process|plasma membrane|signal transduction|cation binding|hydrolase activity, acting on ester bonds|cytoplasm|lipid metabolic process|cell communication|lipase activity|cytosol|phosphoric ester…	-	-	ko01100|ko00562|ko04070|ko04020|ko04933	Metabolic pathways|Inositol phosphate metabolism|Phosphatidylinositol signaling system|Calcium signaling pathway|AGE-RAGE signaling pathway in diabetic complications	chr2:6613833-6618515	10.92	2.31374	-2.23867	2.31585e-05	0.000600377	DOWN
107410791	LOC107410791	nucleobase-ascorbate transporter 2	GO:0051179|GO:0016020|GO:0005215|GO:0031224|GO:0022857|GO:0016021|GO:0006810|GO:0055085	localization|membrane|transporter activity|intrinsic component of membrane|transmembrane transporter activity|integral component of membrane|transport|transmembrane transport	-	-	-	-	chr1:4563524-4567263	6.05618	1.37095	-2.14323	0.000142573	0.00275848	DOWN
107410805	LOC107410805	cell division control protein 6 homolog B	GO:0005623|GO:0008152|GO:0005622|GO:0044237|GO:0009058|GO:0006807|GO:0044238|GO:0005515|GO:0043231|GO:0006139|GO:0007049|GO:0006725|GO:0051726|GO:0051301|GO:0005634|GO:0006259|GO:0006260|GO:0006270|GO:0006261	cell|metabolic process|intracellular|cellular metabolic process|biosynthetic process|nitrogen compound metabolic process|primary metabolic process|protein binding|intracellular membrane-bounded organelle|nucleobase-containing compound metabolic process|cell cycle|cellular aromatic compound metabolic process|regulation of cell cycle|cell division|nucleus|DNA metabolic process|DNA replication|DNA r…	-	-	ko04110|ko04111|ko04113	Cell cycle|Cell cycle - yeast|Meiosis - yeast	chr2:6799505-6804584	5.59236	0.886138	-2.65785	0.00013153	0.00258432	DOWN
107410817	LOC107410817	uncharacterized LOC107410817	GO:0051179|GO:0005576|GO:0008289|GO:0006810|GO:0071702|GO:0006869	localization|extracellular region|lipid binding|transport|organic substance transport|lipid transport	-	-	-	-	chr2:6240351-6241140	8.03739	0.396245	-4.34226	0.000198361	0.00363358	DOWN
107410829	LOC107410829	(R)-mandelonitrile lyase 1-like	GO:0008152|GO:0003824|GO:0048037|GO:0006807|GO:0016829|GO:0050662|GO:0000166|GO:0016832|GO:0050898|GO:0050660|GO:0046593	metabolic process|catalytic activity|cofactor binding|nitrogen compound metabolic process|lyase activity|coenzyme binding|nucleotide binding|aldehyde-lyase activity|nitrile metabolic process|flavin adenine dinucleotide binding|mandelonitrile lyase activity	-	-	ko01110|ko00460	Biosynthesis of secondary metabolites|Cyanoamino acid metabolism	chr1:382692-384932	17.7126	129.165	2.86636	9.12156e-11	1.10147e-08	UP
107410845	LOC107410845	sodium-dependent phosphate transport protein 1, chloroplastic	GO:0051179|GO:0016020|GO:0005623|GO:0005215|GO:0050896|GO:0031224|GO:0005622|GO:0009607|GO:0022857|GO:0051707|GO:0042651|GO:0043231|GO:0016021|GO:0009624|GO:0006810|GO:0009579|GO:0005737|GO:0022891|GO:0055085|GO:0015144|GO:0009314|GO:0006811|GO:0015075|GO:0034220|GO:0009416|GO:0005315|GO:0051119|GO:0009536|GO:0055035|GO:0009535|GO:0006812|GO:0015293|GO:0008509|GO:0098656|GO:0008324|GO:0009534|GO:…	localization|membrane|cell|transporter activity|response to stimulus|intrinsic component of membrane|intracellular|response to biotic stimulus|transmembrane transporter activity|response to other organism|thylakoid membrane|intracellular membrane-bounded organelle|integral component of membrane|response to nematode|transport|thylakoid|cytoplasm|substrate-specific transmembrane transporter activit…	-	-	-	-	chr2:6851298-6856173	0.558055	3.31063	2.56863	0.000207371	0.00376357	UP
107410851	LOC107410851	uncharacterized LOC107410851	GO:0005623|GO:0005622|GO:0043231|GO:0005737|GO:0009536|GO:0009507	cell|intracellular|intracellular membrane-bounded organelle|cytoplasm|plastid|chloroplast	-	-	-	-	chr1:4381258-4382059	5.0106	1.00149	-2.32284	0.00358893	0.0365245	DOWN
107410868	LOC107410868	BURP domain-containing protein 5-like	GO:0005576|GO:0005623|GO:0045735|GO:0050896|GO:0006950|GO:0005622|GO:0012505|GO:0009725|GO:0005768|GO:0043231|GO:0006970|GO:0005737|GO:0009415|GO:0009414|GO:0005794|GO:0009737|GO:0009269|GO:0009651|GO:0005802	extracellular region|cell|nutrient reservoir activity|response to stimulus|response to stress|intracellular|endomembrane system|response to hormone|endosome|intracellular membrane-bounded organelle|response to osmotic stress|cytoplasm|response to water|response to water deprivation|Golgi apparatus|response to abscisic acid|response to desiccation|response to salt stress|trans-Golgi network	-	-	-	-	chr2:6314945-6317419	24.1855	3.83474	-2.65694	0.000324559	0.00540251	DOWN
107410900	LOC107410900	18.5 kDa class I heat shock protein-like	GO:0005623|GO:0050896|GO:0006950|GO:0005622|GO:0009408|GO:0009266|GO:0006979|GO:0005737	cell|response to stimulus|response to stress|intracellular|response to heat|response to temperature stimulus|response to oxidative stress|cytoplasm	-	-	ko04141	Protein processing in endoplasmic reticulum	chr2:7155379-7156008	0.278125	8.07288	4.85928	0.000233065	0.00413984	UP
107410909	LOC107410909	18.5 kDa class I heat shock protein-like	-	-	-	-	-	-	chr2:7121464-7122048	0.0937234	66.3101	9.4666	2.94733e-18	1.28803e-15	UP
107410914	LOC107410914	18.5 kDa class I heat shock protein-like	GO:0005623|GO:0050896|GO:0006950|GO:0005622|GO:0009408|GO:0009266|GO:0006979|GO:0005737	cell|response to stimulus|response to stress|intracellular|response to heat|response to temperature stimulus|response to oxidative stress|cytoplasm	-	-	ko04141	Protein processing in endoplasmic reticulum	chr2:7101485-7102356	0.645282	29.5145	5.51535	1.96573e-17	7.62261e-15	UP
107410922	LOC107410922	uncharacterized LOC107410922	GO:0032502|GO:0005623|GO:0000003|GO:0003006|GO:0005622|GO:0009791|GO:0043231|GO:0007275|GO:0048316|GO:0009793|GO:0010154|GO:0005634|GO:0009790	developmental process|cell|reproduction|developmental process involved in reproduction|intracellular|post-embryonic development|intracellular membrane-bounded organelle|multicellular organism development|seed development|embryo development ending in seed dormancy|fruit development|nucleus|embryo development	-	-	-	-	chr2:7576104-7577615	5.40829	132.557	4.61529	5.46504e-29	1.86896e-25	UP
107410933	LOC107410933	18.5 kDa class I heat shock protein-like	GO:0005623|GO:0050896|GO:0006950|GO:0005622|GO:0009408|GO:0009266|GO:0006979|GO:0005737|GO:0009314|GO:0009416|GO:0042542|GO:0000302|GO:0009642|GO:0009644	cell|response to stimulus|response to stress|intracellular|response to heat|response to temperature stimulus|response to oxidative stress|cytoplasm|response to radiation|response to light stimulus|response to hydrogen peroxide|response to reactive oxygen species|response to light intensity|response to high light intensity	-	-	ko04141	Protein processing in endoplasmic reticulum	chr2:8012282-8013076	1.57148	7.25462	2.20678	0.00185994	0.0219399	UP
107410934	LOC107410934	18.5 kDa class I heat shock protein-like	GO:0005623|GO:0050896|GO:0006950|GO:0005622|GO:0009408|GO:0009266|GO:0005737	cell|response to stimulus|response to stress|intracellular|response to heat|response to temperature stimulus|cytoplasm	-	-	ko04141	Protein processing in endoplasmic reticulum	chr2:8015361-8016243	3.76931	38.5782	3.35541	1.63708e-09	1.44927e-07	UP
107410936	LOC107410936	18.5 kDa class I heat shock protein-like	GO:0005623|GO:0050896|GO:0006950|GO:0005622|GO:0009408|GO:0009266|GO:0006979|GO:0005737|GO:0009314|GO:0009416|GO:0042542|GO:0000302|GO:0009642|GO:0009644	cell|response to stimulus|response to stress|intracellular|response to heat|response to temperature stimulus|response to oxidative stress|cytoplasm|response to radiation|response to light stimulus|response to hydrogen peroxide|response to reactive oxygen species|response to light intensity|response to high light intensity	-	-	ko04141	Protein processing in endoplasmic reticulum	chr2:7621978-7622834	16.2759	132.671	3.02704	9.89867e-10	9.23831e-08	UP
107410940	LOC107410940	18.5 kDa class I heat shock protein-like	GO:0005623|GO:0050896|GO:0006950|GO:0005622|GO:0009408|GO:0009266|GO:0005737	cell|response to stimulus|response to stress|intracellular|response to heat|response to temperature stimulus|cytoplasm	-	-	ko04141	Protein processing in endoplasmic reticulum	chr2:7949744-7950529	2.98473	51.4598	4.10777	6.63346e-12	9.92567e-10	UP
107410942	LOC107410942	18.5 kDa class I heat shock protein-like	GO:0005623|GO:0050896|GO:0006950|GO:0005622|GO:0009408|GO:0009266|GO:0005737	cell|response to stimulus|response to stress|intracellular|response to heat|response to temperature stimulus|cytoplasm	-	-	ko04141	Protein processing in endoplasmic reticulum	chr2:7954026-7954700	4.82833	80.246	4.05483	6.24868e-14	1.37631e-11	UP
107410945	LOC107410945	18.5 kDa class I heat shock protein-like	GO:0005623|GO:0050896|GO:0006950|GO:0005622|GO:0009408|GO:0009266|GO:0005737	cell|response to stimulus|response to stress|intracellular|response to heat|response to temperature stimulus|cytoplasm	-	-	ko04141	Protein processing in endoplasmic reticulum	chr2:7977281-7977958	0.73847	15.4051	4.38273	3.30429e-08	2.08178e-06	UP
107410947	LOC107410947	18.5 kDa class I heat shock protein-like	GO:0005623|GO:0050896|GO:0006950|GO:0005622|GO:0009408|GO:0009266|GO:0005737	cell|response to stimulus|response to stress|intracellular|response to heat|response to temperature stimulus|cytoplasm	-	-	ko04141	Protein processing in endoplasmic reticulum	chr2:7963984-7964737	0.460051	14.2893	4.957	1.66169e-06	6.48929e-05	UP
107410963	LOC107410963	18.5 kDa class I heat shock protein	GO:0005623|GO:0050896|GO:0006950|GO:0005622|GO:0009408|GO:0009266|GO:0005737	cell|response to stimulus|response to stress|intracellular|response to heat|response to temperature stimulus|cytoplasm	-	-	ko04141	Protein processing in endoplasmic reticulum	chr2:7995805-8009065	0.428448	30.9481	6.17459	3.04031e-20	2.09264e-17	UP
107410965	LOC107410965	18.5 kDa class I heat shock protein-like	GO:0005623|GO:0050896|GO:0006950|GO:0005622|GO:0009408|GO:0009266|GO:0005737	cell|response to stimulus|response to stress|intracellular|response to heat|response to temperature stimulus|cytoplasm	-	-	ko04141	Protein processing in endoplasmic reticulum	chr2:8005277-8006051	0.885987	23.6835	4.74045	7.47181e-13	1.3358e-10	UP
107410969	LOC107410969	L-type lectin-domain containing receptor kinase IV.2-like	GO:0016020|GO:0005623|GO:0030054|GO:0023052|GO:0004871|GO:0050896|GO:0008152|GO:0003824|GO:0016740|GO:0051716|GO:0044237|GO:0004872|GO:0009506|GO:0071944|GO:0005911|GO:0038023|GO:0044238|GO:0005886|GO:0005515|GO:0009725|GO:0004888|GO:0019899|GO:0007165|GO:0019538|GO:0070887|GO:0006793|GO:0001653|GO:0016772|GO:0007154|GO:0016773|GO:0019199|GO:0016301|GO:0007166|GO:0044267|GO:0006796|GO:0009755|GO:…	membrane|cell|cell junction|signaling|signal transducer activity|response to stimulus|metabolic process|catalytic activity|transferase activity|cellular response to stimulus|cellular metabolic process|receptor activity|plasmodesma|cell periphery|cell-cell junction|signaling receptor activity|primary metabolic process|plasma membrane|protein binding|response to hormone|transmembrane signaling rece…	-	-	-	-	chr2:8448983-8451193	0.052889	1.32064	4.64213	0.000213868	0.00386113	UP
107410972	LOC107410972	scarecrow-like protein 14	GO:0005623|GO:0050896|GO:0008152|GO:0003700|GO:0005622|GO:0044237|GO:0009058|GO:0006807|GO:0044238|GO:0043231|GO:0009410|GO:0006139|GO:0006725|GO:0005737|GO:0005829|GO:0019438|GO:0010467|GO:0005634|GO:0010468|GO:0010628|GO:0051252|GO:0016070|GO:0045893|GO:0032774|GO:0006351|GO:2001141|GO:0006355|GO:1903506	cell|response to stimulus|metabolic process|transcription factor activity, sequence-specific DNA binding|intracellular|cellular metabolic process|biosynthetic process|nitrogen compound metabolic process|primary metabolic process|intracellular membrane-bounded organelle|response to xenobiotic stimulus|nucleobase-containing compound metabolic process|cellular aromatic compound metabolic process|cyt…	-	-	-	-	chr2:8709450-8711405	0.900735	9.57096	3.40949	4.16924e-05	0.000988972	UP
107410973	LOC107410973	scarecrow-like protein 33	GO:0005623|GO:0050896|GO:0008152|GO:0003700|GO:0005622|GO:0044237|GO:0009058|GO:0006807|GO:0044238|GO:0043231|GO:0009410|GO:0006139|GO:0006725|GO:0005737|GO:0005829|GO:0019438|GO:0010467|GO:0005634|GO:0010468|GO:0010628|GO:0051252|GO:0016070|GO:0045893|GO:0032774|GO:0006351|GO:2001141|GO:0006355|GO:1903506	cell|response to stimulus|metabolic process|transcription factor activity, sequence-specific DNA binding|intracellular|cellular metabolic process|biosynthetic process|nitrogen compound metabolic process|primary metabolic process|intracellular membrane-bounded organelle|response to xenobiotic stimulus|nucleobase-containing compound metabolic process|cellular aromatic compound metabolic process|cyt…	-	-	-	-	chr2:8735598-8737487	1.04516	6.68679	2.67759	0.000950004	0.012815	UP
107410985	LOC107410985	L-type lectin-domain containing receptor kinase IV.2-like	GO:0016020|GO:0005623|GO:0030054|GO:0023052|GO:0004871|GO:0050896|GO:0008152|GO:0003824|GO:0016740|GO:0051716|GO:0044237|GO:0004872|GO:0009506|GO:0071944|GO:0005911|GO:0038023|GO:0044238|GO:0005886|GO:0005515|GO:0009725|GO:0004888|GO:0019899|GO:0007165|GO:0019538|GO:0070887|GO:0006793|GO:0001653|GO:0016772|GO:0007154|GO:0016773|GO:0019199|GO:0016301|GO:0007166|GO:0044267|GO:0006796|GO:0009755|GO:…	membrane|cell|cell junction|signaling|signal transducer activity|response to stimulus|metabolic process|catalytic activity|transferase activity|cellular response to stimulus|cellular metabolic process|receptor activity|plasmodesma|cell periphery|cell-cell junction|signaling receptor activity|primary metabolic process|plasma membrane|protein binding|response to hormone|transmembrane signaling rece…	-	-	-	-	chr2:8477177-8479631	0.26216	3.13762	3.58115	1.11407e-05	0.000320417	UP
107410986	LOC107410986	L-type lectin-domain containing receptor kinase IV.2-like	GO:0016020|GO:0005623|GO:0030054|GO:0023052|GO:0004871|GO:0050896|GO:0008152|GO:0003824|GO:0016740|GO:0051716|GO:0044237|GO:0004872|GO:0009506|GO:0071944|GO:0005911|GO:0038023|GO:0044238|GO:0005886|GO:0005515|GO:0009725|GO:0004888|GO:0019899|GO:0007165|GO:0019538|GO:0070887|GO:0006793|GO:0001653|GO:0016772|GO:0007154|GO:0016773|GO:0019199|GO:0016301|GO:0007166|GO:0044267|GO:0006796|GO:0009755|GO:…	membrane|cell|cell junction|signaling|signal transducer activity|response to stimulus|metabolic process|catalytic activity|transferase activity|cellular response to stimulus|cellular metabolic process|receptor activity|plasmodesma|cell periphery|cell-cell junction|signaling receptor activity|primary metabolic process|plasma membrane|protein binding|response to hormone|transmembrane signaling rece…	-	-	-	-	chr2:8481179-8483927	0.0685067	4.39984	6.00506	1.48794e-10	1.73584e-08	UP
107411009	LOC107411009	L-type lectin-domain containing receptor kinase IV.2-like	GO:0016020|GO:0005623|GO:0030054|GO:0023052|GO:0004871|GO:0050896|GO:0008152|GO:0003824|GO:0016740|GO:0051716|GO:0044237|GO:0004872|GO:0009506|GO:0071944|GO:0005911|GO:0038023|GO:0044238|GO:0005886|GO:0005515|GO:0009725|GO:0004888|GO:0019899|GO:0007165|GO:0019538|GO:0070887|GO:0006793|GO:0001653|GO:0016772|GO:0007154|GO:0016773|GO:0019199|GO:0016301|GO:0007166|GO:0044267|GO:0006796|GO:0009755|GO:…	membrane|cell|cell junction|signaling|signal transducer activity|response to stimulus|metabolic process|catalytic activity|transferase activity|cellular response to stimulus|cellular metabolic process|receptor activity|plasmodesma|cell periphery|cell-cell junction|signaling receptor activity|primary metabolic process|plasma membrane|protein binding|response to hormone|transmembrane signaling rece…	-	-	-	-	chr2:8445011-8447148	0.0273091	1.21317	5.47325	0.00132381	0.0166882	UP
107411011	LOC107411011	uncharacterized LOC107411011	GO:0005623|GO:0005622|GO:0005515|GO:0043231|GO:0005634	cell|intracellular|protein binding|intracellular membrane-bounded organelle|nucleus	-	-	-	-	chr2:8588709-8589520	0.350831	4.62986	3.72212	0.000124043	0.00245694	UP
107411015	LOC107411015	trans-resveratrol di-O-methyltransferase-like	GO:0008152|GO:0003824|GO:0016740|GO:0044237|GO:0009058|GO:0006725|GO:0019748|GO:0009698|GO:0008168|GO:0019438|GO:0009699|GO:0044550|GO:0046287|GO:0009717|GO:0008757|GO:0008171|GO:0033800	metabolic process|catalytic activity|transferase activity|cellular metabolic process|biosynthetic process|cellular aromatic compound metabolic process|secondary metabolic process|phenylpropanoid metabolic process|methyltransferase activity|aromatic compound biosynthetic process|phenylpropanoid biosynthetic process|secondary metabolite biosynthetic process|isoflavonoid metabolic process|isoflavono…	-	-	-	-	chr1:3737642-3739198	0.0393598	2.53436	6.00875	3.70393e-06	0.000130238	UP
107411031	LOC107411031	L-type lectin-domain containing receptor kinase IV.2-like	GO:0016020|GO:0005623|GO:0030054|GO:0023052|GO:0004871|GO:0050896|GO:0008152|GO:0003824|GO:0016740|GO:0051716|GO:0044237|GO:0004872|GO:0009506|GO:0071944|GO:0005911|GO:0038023|GO:0044238|GO:0005886|GO:0005515|GO:0009725|GO:0004888|GO:0019899|GO:0007165|GO:0019538|GO:0070887|GO:0006793|GO:0001653|GO:0016772|GO:0007154|GO:0016773|GO:0019199|GO:0016301|GO:0007166|GO:0044267|GO:0006796|GO:0009755|GO:…	membrane|cell|cell junction|signaling|signal transducer activity|response to stimulus|metabolic process|catalytic activity|transferase activity|cellular response to stimulus|cellular metabolic process|receptor activity|plasmodesma|cell periphery|cell-cell junction|signaling receptor activity|primary metabolic process|plasma membrane|protein binding|response to hormone|transmembrane signaling rece…	-	-	-	-	chr2:8469558-8472739	0.107894	3.57681	5.05098	1.1972e-07	6.48926e-06	UP
107411040	LOC107411040	L-type lectin-domain containing receptor kinase IV.2-like	GO:0016020|GO:0005623|GO:0030054|GO:0023052|GO:0004871|GO:0050896|GO:0008152|GO:0003824|GO:0016740|GO:0051716|GO:0044237|GO:0004872|GO:0009506|GO:0071944|GO:0005911|GO:0038023|GO:0044238|GO:0005886|GO:0005515|GO:0009725|GO:0004888|GO:0019899|GO:0007165|GO:0019538|GO:0070887|GO:0006793|GO:0001653|GO:0016772|GO:0007154|GO:0016773|GO:0019199|GO:0016301|GO:0007166|GO:0044267|GO:0006796|GO:0009755|GO:…	membrane|cell|cell junction|signaling|signal transducer activity|response to stimulus|metabolic process|catalytic activity|transferase activity|cellular response to stimulus|cellular metabolic process|receptor activity|plasmodesma|cell periphery|cell-cell junction|signaling receptor activity|primary metabolic process|plasma membrane|protein binding|response to hormone|transmembrane signaling rece…	-	-	-	-	chr2:8465709-8467986	0.120343	1.04165	3.11365	0.00362947	0.0368412	UP
107411049	LOC107411049	methyl-CpG-binding domain-containing protein 7-like	GO:0005623|GO:0050896|GO:0008152|GO:0003824|GO:0016787|GO:0005622|GO:0009892|GO:0044237|GO:0009058|GO:0006807|GO:0044238|GO:0043233|GO:0005515|GO:0051747|GO:0019899|GO:0043231|GO:0080111|GO:0035514|GO:0003676|GO:0006139|GO:0080167|GO:0006725|GO:0016458|GO:0000166|GO:0005694|GO:0019438|GO:0010467|GO:0005634|GO:0003677|GO:0031981|GO:0051276|GO:0008327|GO:1901537|GO:0010468|GO:0098687|GO:0006259|GO:…	cell|response to stimulus|metabolic process|catalytic activity|hydrolase activity|intracellular|negative regulation of metabolic process|cellular metabolic process|biosynthetic process|nitrogen compound metabolic process|primary metabolic process|organelle lumen|protein binding|cytosine C-5 DNA demethylase activity|enzyme binding|intracellular membrane-bounded organelle|DNA demethylation|DNA deme…	-	-	-	-	chr2:9105506-9109131	2.71494	0.110986	-4.61247	0.000557915	0.00849116	DOWN
107411076	LOC107411076	heat shock cognate 70 kDa protein-like	GO:0032502|GO:0005576|GO:0016020|GO:0005623|GO:0030054|GO:0050896|GO:0008152|GO:0031090|GO:0006457|GO:0006950|GO:0005622|GO:0044237|GO:0009506|GO:0071944|GO:0009607|GO:0005911|GO:0009058|GO:0006807|GO:0050793|GO:0051707|GO:0012505|GO:0044238|GO:0005886|GO:0043233|GO:0048046|GO:0005515|GO:0009615|GO:2000026|GO:0019899|GO:0098588|GO:0009408|GO:0009620|GO:0005618|GO:0009791|GO:0043231|GO:0009266|GO:…	developmental process|extracellular region|membrane|cell|cell junction|response to stimulus|metabolic process|organelle membrane|protein folding|response to stress|intracellular|cellular metabolic process|plasmodesma|cell periphery|response to biotic stimulus|cell-cell junction|biosynthetic process|nitrogen compound metabolic process|regulation of developmental process|response to other organism|…	-	-	ko03040|ko04141|ko04144|ko04010|ko04213	Spliceosome|Protein processing in endoplasmic reticulum|Endocytosis|MAPK signaling pathway|Longevity regulating pathway - multiple species	chr2:9486170-9489224	19.3569	144.934	2.90447	1.75663e-14	4.31818e-12	UP
107411115	LOC107411115	17.6 kDa class I heat shock protein 3-like	GO:0005623|GO:0050896|GO:0006950|GO:0005622|GO:0009408|GO:0009266|GO:0005737	cell|response to stimulus|response to stress|intracellular|response to heat|response to temperature stimulus|cytoplasm	-	-	ko04141	Protein processing in endoplasmic reticulum	chr2:9585417-9586293	5.40308	40.4006	2.90252	4.83924e-10	5.0088e-08	UP
107411118	LOC107411118	chitinase 2-like	GO:0005576|GO:0008152|GO:0003824|GO:0016787|GO:0006807|GO:0008061|GO:0016798|GO:1901135|GO:0004553|GO:0004568|GO:0006032	extracellular region|metabolic process|catalytic activity|hydrolase activity|nitrogen compound metabolic process|chitin binding|hydrolase activity, acting on glycosyl bonds|carbohydrate derivative metabolic process|hydrolase activity, hydrolyzing O-glycosyl compounds|chitinase activity|chitin catabolic process	-	-	-	-	chr2:9867329-9871348	37.9446	4.43521	-3.09682	4.44395e-10	4.6345e-08	DOWN
107411119	LOC107411119	chitinase 2-like	GO:0005576|GO:0008152|GO:0003824|GO:0016787|GO:0006807|GO:0008061|GO:0016798|GO:1901135|GO:0004553|GO:0004568|GO:0006032	extracellular region|metabolic process|catalytic activity|hydrolase activity|nitrogen compound metabolic process|chitin binding|hydrolase activity, acting on glycosyl bonds|carbohydrate derivative metabolic process|hydrolase activity, hydrolyzing O-glycosyl compounds|chitinase activity|chitin catabolic process	-	-	-	-	chr2:9864958-9866112	5.29451	38.5496	2.86415	0.000207934	0.00377131	UP
107411130	LOC107411130	histone H4	GO:0005623|GO:0050896|GO:0006950|GO:0005622|GO:0012505|GO:0000785|GO:0043233|GO:0043234|GO:0043231|GO:0003676|GO:0005737|GO:0009415|GO:0009414|GO:0000786|GO:0005794|GO:0005694|GO:0005829|GO:0005634|GO:0003677|GO:0031981|GO:0005730	cell|response to stimulus|response to stress|intracellular|endomembrane system|chromatin|organelle lumen|protein complex|intracellular membrane-bounded organelle|nucleic acid binding|cytoplasm|response to water|response to water deprivation|nucleosome|Golgi apparatus|chromosome|cytosol|nucleus|DNA binding|nuclear lumen|nucleolus	-	-	-	-	chr2:9974345-9974966	48.266	8.62298	-2.48475	1.12267e-07	6.15725e-06	DOWN
107411155	LOC107411155	uncharacterized LOC107411155	GO:0005623|GO:0003824|GO:0016740|GO:0005622|GO:0012505|GO:0043231|GO:0016757|GO:0005737|GO:0005794	cell|catalytic activity|transferase activity|intracellular|endomembrane system|intracellular membrane-bounded organelle|transferase activity, transferring glycosyl groups|cytoplasm|Golgi apparatus	-	-	-	-	chr2:10175384-10176778	5.63139	0.0597956	-6.55731	2.60994e-08	1.68678e-06	DOWN
107411166	LOC107411166	two-component response regulator-like PRR73	GO:0048511|GO:0005623|GO:0023052|GO:0004871|GO:0050896|GO:0008152|GO:0051716|GO:0005622|GO:0009892|GO:0044237|GO:0009058|GO:0006807|GO:0007623|GO:0044238|GO:0007165|GO:0043231|GO:0009266|GO:0003676|GO:0006139|GO:0006725|GO:0005737|GO:0000156|GO:0009314|GO:0007154|GO:0019438|GO:0010467|GO:0010017|GO:0005634|GO:0003677|GO:0009416|GO:0010468|GO:0051252|GO:0035556|GO:0010629|GO:0005739|GO:0016070|GO:…	rhythmic process|cell|signaling|signal transducer activity|response to stimulus|metabolic process|cellular response to stimulus|intracellular|negative regulation of metabolic process|cellular metabolic process|biosynthetic process|nitrogen compound metabolic process|circadian rhythm|primary metabolic process|signal transduction|intracellular membrane-bounded organelle|response to temperature stim…	-	-	ko04712	Circadian rhythm - plant	chr2:10197705-10204716	3.24414	44.0376	3.76283	6.42418e-21	5.05345e-18	UP
107411197	LOC107411197	phragmoplast orienting kinesin 2	GO:0005623|GO:0003824|GO:0016787|GO:0005622|GO:0007049|GO:0005737|GO:0016817|GO:0005874|GO:0051301|GO:0000166|GO:0016818|GO:0000910|GO:0017076|GO:0000278|GO:0009524|GO:0005856|GO:0005524|GO:0015630|GO:0016462|GO:0030554|GO:0000281|GO:0000911|GO:0017111|GO:0003774|GO:0003777	cell|catalytic activity|hydrolase activity|intracellular|cell cycle|cytoplasm|hydrolase activity, acting on acid anhydrides|microtubule|cell division|nucleotide binding|hydrolase activity, acting on acid anhydrides, in phosphorus-containing anhydrides|cytokinesis|purine nucleotide binding|mitotic cell cycle|phragmoplast|cytoskeleton|ATP binding|microtubule cytoskeleton|pyrophosphatase activity|ad…	-	-	-	-	chr2:11183860-11192158	10.9109	2.33445	-2.22461	1.99037e-08	1.33124e-06	DOWN
107411240	LOC107411240	uncharacterized LOC107411240	GO:0005576|GO:0009055|GO:0043169|GO:0046872|GO:0046914|GO:0005507	extracellular region|electron carrier activity|cation binding|metal ion binding|transition metal ion binding|copper ion binding	-	-	-	-	chr2:11042842-11043926	1.54594	240.27	7.28003	8.90373e-19	4.22651e-16	UP
107411247	LOC107411247	uncharacterized LOC107411247	GO:0005576|GO:0009055|GO:0043169|GO:0046872|GO:0046914|GO:0005507	extracellular region|electron carrier activity|cation binding|metal ion binding|transition metal ion binding|copper ion binding	-	-	-	-	chr2:11035381-11036106	4.02411	352.316	6.45205	4.64524e-19	2.2838e-16	UP
107411248	LOC107411248	uncharacterized LOC107411248	GO:0005576|GO:0009055|GO:0043169|GO:0046872|GO:0046914|GO:0005507	extracellular region|electron carrier activity|cation binding|metal ion binding|transition metal ion binding|copper ion binding	-	-	-	-	chr2:11032234-11033017	1.01016	30.2257	4.90312	1.26556e-13	2.56202e-11	UP
107411294	LOC107411294	uncharacterized LOC107411294	GO:0005623|GO:0008152|GO:0005622|GO:0044237|GO:0009058|GO:0006807|GO:0044238|GO:0043231|GO:0006139|GO:0006725|GO:0005737|GO:0005829|GO:0019438|GO:0010467|GO:0005739|GO:0009536|GO:0016070|GO:0032774|GO:0006351|GO:0009507|GO:0006353	cell|metabolic process|intracellular|cellular metabolic process|biosynthetic process|nitrogen compound metabolic process|primary metabolic process|intracellular membrane-bounded organelle|nucleobase-containing compound metabolic process|cellular aromatic compound metabolic process|cytoplasm|cytosol|aromatic compound biosynthetic process|gene expression|mitochondrion|plastid|RNA metabolic process|…	-	-	-	-	chr1:4603171-4605698	5.214	1.18911	-2.1325	0.0034869	0.0357015	DOWN
107411334	LOC107411334	replication factor C subunit 1-like	GO:0005623|GO:0000003|GO:0050896|GO:0008152|GO:0003824|GO:0032259|GO:0016787|GO:0016740|GO:0006950|GO:0051716|GO:0005622|GO:0009892|GO:0044237|GO:0009058|GO:0006807|GO:0051321|GO:0044238|GO:0043234|GO:0009725|GO:0043231|GO:0019538|GO:0003676|GO:0006139|GO:0007049|GO:0006725|GO:0016458|GO:0016570|GO:0005663|GO:0006281|GO:0016817|GO:0007131|GO:0051307|GO:0007126|GO:0016772|GO:0007059|GO:0000166|GO:…	cell|reproduction|response to stimulus|metabolic process|catalytic activity|methylation|hydrolase activity|transferase activity|response to stress|cellular response to stimulus|intracellular|negative regulation of metabolic process|cellular metabolic process|biosynthetic process|nitrogen compound metabolic process|meiotic cell cycle|primary metabolic process|protein complex|response to hormone|in…	-	-	ko03420|ko03030|ko03430	Nucleotide excision repair|DNA replication|Mismatch repair	chr2:13917832-13936252	8.38852	1.24457	-2.75276	5.46913e-05	0.00124135	DOWN
107411337	LOC107411337	uncharacterized LOC107411337	GO:0005576	extracellular region	-	-	-	-	chr2:14129616-14130853	27.0674	0.460526	-5.87713	9.99873e-06	0.000293258	DOWN
107411386	LOC107411386	serine/threonine-protein kinase RUNKEL	GO:0032502|GO:0016020|GO:0005623|GO:0030054|GO:0000003|GO:0003824|GO:0003006|GO:0016740|GO:0009653|GO:0005622|GO:0009506|GO:0071944|GO:0005911|GO:0051321|GO:0005886|GO:0005515|GO:0009791|GO:0048236|GO:0007275|GO:0007049|GO:0005737|GO:0048316|GO:0008092|GO:0032403|GO:0016772|GO:0009793|GO:0048869|GO:0005874|GO:0051301|GO:0007349|GO:0007017|GO:0000166|GO:0009574|GO:0010154|GO:0000910|GO:0017076|GO:…	developmental process|membrane|cell|cell junction|reproduction|catalytic activity|developmental process involved in reproduction|transferase activity|anatomical structure morphogenesis|intracellular|plasmodesma|cell periphery|cell-cell junction|meiotic cell cycle|plasma membrane|protein binding|post-embryonic development|plant-type spore development|multicellular organism development|cell cycle|c…	-	-	-	-	chr2:16192208-16198242	9.66553	2.33759	-2.04782	2.00095e-06	7.59864e-05	DOWN
107411392	LOC107411392	peroxidase 3-like	-	-	-	-	-	-	chr2:16129118-16130769	1.15893	4.99731	2.10836	0.00282263	0.0303921	UP
107411420	LOC107411420	cytochrome P450 714C2-like	GO:0016020|GO:0005623|GO:0008152|GO:0042175|GO:0031090|GO:0019825|GO:0031224|GO:0005622|GO:0005789|GO:0012505|GO:0098588|GO:0043231|GO:0016021|GO:0005737|GO:0055114|GO:0005783	membrane|cell|metabolic process|nuclear outer membrane-endoplasmic reticulum membrane network|organelle membrane|oxygen binding|intrinsic component of membrane|intracellular|endoplasmic reticulum membrane|endomembrane system|bounding membrane of organelle|intracellular membrane-bounded organelle|integral component of membrane|cytoplasm|oxidation-reduction process|endoplasmic reticulum	-	-	-	-	chr1:4257062-4259806	10.5884	0.310522	-5.09165	1.03054e-08	7.56609e-07	DOWN
107411443	LOC107411443	uncharacterized LOC107411443	-	-	-	-	-	-	chr2:16603810-16604530	10.0046	130.162	3.70158	4.71626e-05	0.00109762	UP
107411468	LOC107411468	high affinity nitrate transporter 2.4-like	GO:0032502|GO:0051179|GO:0016020|GO:0005623|GO:0005215|GO:0050896|GO:0031090|GO:0031224|GO:0051716|GO:0005622|GO:0071944|GO:0022857|GO:0005886|GO:0098588|GO:0009791|GO:0043231|GO:0016021|GO:0007275|GO:0048569|GO:0006810|GO:0005737|GO:0070887|GO:0022891|GO:0055085|GO:0048364|GO:0048513|GO:0005774|GO:0006811|GO:0015075|GO:0034220|GO:0005773|GO:0009705|GO:0010167|GO:0048528|GO:0022622|GO:0048527|GO:…	developmental process|localization|membrane|cell|transporter activity|response to stimulus|organelle membrane|intrinsic component of membrane|cellular response to stimulus|intracellular|cell periphery|transmembrane transporter activity|plasma membrane|bounding membrane of organelle|post-embryonic development|intracellular membrane-bounded organelle|integral component of membrane|multicellular org…	-	-	ko00910	Nitrogen metabolism	chr2:17061558-17063685	47.7633	1.88547	-4.6629	1.40411e-19	8.05372e-17	DOWN
107411527	LOC107411527	UDP-glycosyltransferase 87A2-like	GO:0032502|GO:0005623|GO:0000003|GO:0003824|GO:0003006|GO:0016740|GO:0005622|GO:0050793|GO:2000026|GO:0009791|GO:0009909|GO:0043231|GO:0007275|GO:0016757|GO:0005737|GO:0048367|GO:0005829|GO:0048831|GO:0005634|GO:0008194|GO:0009908|GO:0016758	developmental process|cell|reproduction|catalytic activity|developmental process involved in reproduction|transferase activity|intracellular|regulation of developmental process|regulation of multicellular organismal development|post-embryonic development|regulation of flower development|intracellular membrane-bounded organelle|multicellular organism development|transferase activity, transferring …	-	-	-	-	chr2:17870328-17873898	6.53449	26.5744	2.02389	7.38755e-06	0.000230718	UP
107411528	LOC107411528	UDP-glycosyltransferase 87A1-like	GO:0008152|GO:0003824|GO:0016740|GO:0016757|GO:0008194|GO:0016758	metabolic process|catalytic activity|transferase activity|transferase activity, transferring glycosyl groups|UDP-glycosyltransferase activity|transferase activity, transferring hexosyl groups	-	-	-	-	chr2:17892257-17896479	2.73022	19.9849	2.87182	1.77453e-08	1.20932e-06	UP
107411574	LOC107411574	non-specific lipid-transfer protein 1-like	GO:0051179|GO:0005576|GO:0005623|GO:0050896|GO:0008289|GO:0006950|GO:0071944|GO:0048046|GO:0009725|GO:0005618|GO:0006810|GO:0009415|GO:0009414|GO:0071702|GO:0009737|GO:0006869	localization|extracellular region|cell|response to stimulus|lipid binding|response to stress|cell periphery|apoplast|response to hormone|cell wall|transport|response to water|response to water deprivation|organic substance transport|response to abscisic acid|lipid transport	-	-	-	-	chr2:18131714-18132588	14.455	219.437	3.92416	1.28807e-06	5.16954e-05	UP
107411578	LOC107411578	probable glutathione S-transferase parA	GO:0016020|GO:0005623|GO:0050896|GO:0008152|GO:0003824|GO:0031090|GO:0016740|GO:0006950|GO:0051716|GO:0005622|GO:0044237|GO:0071944|GO:0006807|GO:0012505|GO:0005886|GO:0098588|GO:0042277|GO:0043231|GO:0006979|GO:0005737|GO:0016765|GO:0070887|GO:0006790|GO:0019748|GO:0043295|GO:0009415|GO:0009414|GO:0007154|GO:0005774|GO:0005794|GO:0006518|GO:0005829|GO:0006749|GO:0005773|GO:0009532|GO:0009407|GO:…	membrane|cell|response to stimulus|metabolic process|catalytic activity|organelle membrane|transferase activity|response to stress|cellular response to stimulus|intracellular|cellular metabolic process|cell periphery|nitrogen compound metabolic process|endomembrane system|plasma membrane|bounding membrane of organelle|peptide binding|intracellular membrane-bounded organelle|response to oxidative …	-	-	ko00480|ko01524|ko00982|ko00980	Glutathione metabolism|Platinum drug resistance|Drug metabolism - cytochrome P450|Metabolism of xenobiotics by cytochrome P450	chr2:18184496-18186313	3.60057	16.7048	2.21396	4.03502e-05	0.000961004	UP
107411605	LOC107411605	nicotianamine synthase 3-like	GO:0032502|GO:0051179|GO:0000003|GO:0040007|GO:0008152|GO:0003824|GO:0003006|GO:0016740|GO:0009653|GO:0044237|GO:0009058|GO:0006807|GO:0016049|GO:0048589|GO:0060560|GO:0009856|GO:0044281|GO:0007275|GO:0009826|GO:0006810|GO:0016765|GO:0009860|GO:0048869|GO:0048868|GO:0030410|GO:0010233|GO:0000904|GO:0009932|GO:0009308|GO:0030154|GO:0048229|GO:0000902|GO:0019752|GO:0030418|GO:0009555	developmental process|localization|reproduction|growth|metabolic process|catalytic activity|developmental process involved in reproduction|transferase activity|anatomical structure morphogenesis|cellular metabolic process|biosynthetic process|nitrogen compound metabolic process|cell growth|developmental growth|developmental growth involved in morphogenesis|pollination|small molecule metabolic pro…	-	-	-	-	chr1:611611-612302	33.5975	2.536	-3.72773	0.000962671	0.0129307	DOWN
107411607	LOC107411607	peroxidase 4-like	GO:0032502|GO:0005576|GO:0005623|GO:0016209|GO:0008152|GO:0003824|GO:0016491|GO:0004601|GO:0005622|GO:0044237|GO:0071944|GO:0009058|GO:0012505|GO:0048046|GO:0005515|GO:0005618|GO:0043231|GO:0046906|GO:0043169|GO:0006725|GO:0005737|GO:0019748|GO:0005794|GO:0009698|GO:0009808|GO:0005829|GO:0019438|GO:2000762|GO:0009699|GO:0044550|GO:0046872|GO:0010087|GO:0020037|GO:0009809|GO:0010089|GO:1901430|GO:…	developmental process|extracellular region|cell|antioxidant activity|metabolic process|catalytic activity|oxidoreductase activity|peroxidase activity|intracellular|cellular metabolic process|cell periphery|biosynthetic process|endomembrane system|apoplast|protein binding|cell wall|intracellular membrane-bounded organelle|tetrapyrrole binding|cation binding|cellular aromatic compound metabolic pro…	-	-	ko01100|ko01110|ko00940	Metabolic pathways|Biosynthesis of secondary metabolites|Phenylpropanoid biosynthesis	chr2:18450219-18470796	0.204126	42.3042	7.6952	1.11421e-22	1.22706e-19	UP
107411617	LOC107411617	cation/H(+) antiporter 14-like	GO:0051179|GO:0016020|GO:0005623|GO:0005215|GO:0071944|GO:0022857|GO:0012505|GO:0005886|GO:0006810|GO:0022891|GO:0055085|GO:0006811|GO:0015075|GO:0006818|GO:0034220|GO:0006812|GO:0015992|GO:0008324|GO:0015297|GO:0098655|GO:0030001|GO:0015672|GO:0015491|GO:1902600|GO:0006814|GO:0015299|GO:0035725|GO:0005451|GO:0046873|GO:0006885|GO:0015385|GO:0015078|GO:0015081	localization|membrane|cell|transporter activity|cell periphery|transmembrane transporter activity|endomembrane system|plasma membrane|transport|substrate-specific transmembrane transporter activity|transmembrane transport|ion transport|ion transmembrane transporter activity|hydrogen transport|ion transmembrane transport|cation transport|proton transport|cation transmembrane transporter activity|a…	-	-	-	-	chr2:18645053-18648300	0.108138	5.23682	5.59774	1.49689e-06	5.91284e-05	UP
107411644	LOC107411644	ABC transporter G family member 33-like	GO:0051179|GO:0016020|GO:0005623|GO:0005215|GO:0050896|GO:0003824|GO:0016787|GO:0031224|GO:0005622|GO:0071944|GO:0022857|GO:0005886|GO:0043231|GO:0016021|GO:0006810|GO:0042493|GO:0055085|GO:0016817|GO:0006855|GO:0016818|GO:0005634|GO:0015893|GO:0016820|GO:0015399|GO:0042626|GO:0016462|GO:0017111|GO:0016887|GO:0042623	localization|membrane|cell|transporter activity|response to stimulus|catalytic activity|hydrolase activity|intrinsic component of membrane|intracellular|cell periphery|transmembrane transporter activity|plasma membrane|intracellular membrane-bounded organelle|integral component of membrane|transport|response to drug|transmembrane transport|hydrolase activity, acting on acid anhydrides|drug transm…	-	-	ko02010	ABC transporters	chr2:18935229-18942596	1.83589	0.360811	-2.34716	0.0043608	0.0421269	DOWN
107411736	LOC107411736	uncharacterized LOC107411736	GO:0005623|GO:0008152|GO:0003824|GO:0016787|GO:0005622|GO:0044237|GO:0006807|GO:0044238|GO:0043231|GO:0006139|GO:0006725|GO:0016788|GO:0005737|GO:0005634|GO:0004518|GO:0090305|GO:0004527|GO:0008408	cell|metabolic process|catalytic activity|hydrolase activity|intracellular|cellular metabolic process|nitrogen compound metabolic process|primary metabolic process|intracellular membrane-bounded organelle|nucleobase-containing compound metabolic process|cellular aromatic compound metabolic process|hydrolase activity, acting on ester bonds|cytoplasm|nucleus|nuclease activity|nucleic acid phosphodi…	-	-	-	-	chr2:19770179-19770760	0.401484	4.4079	3.45668	0.00377629	0.0379587	UP
107411746	LOC107411746	uncharacterized LOC107411746	GO:0016020|GO:0031224|GO:0031225	membrane|intrinsic component of membrane|anchored component of membrane	-	-	-	-	chr2:19971080-19971922	0.652015	7.42705	3.50981	0.00158211	0.0192654	UP
107411777	LOC107411777	peptide chain release factor PrfB2, chloroplastic	GO:0005623|GO:0008152|GO:0005622|GO:0044237|GO:0009058|GO:0006807|GO:0044238|GO:0043231|GO:0043021|GO:0019538|GO:0003676|GO:0005737|GO:0006518|GO:0010467|GO:0009532|GO:0044267|GO:0043022|GO:0003723|GO:0009536|GO:0043043|GO:0043241|GO:0006412|GO:0008135|GO:0009570|GO:0009507|GO:0006415|GO:0003747|GO:0016149	cell|metabolic process|intracellular|cellular metabolic process|biosynthetic process|nitrogen compound metabolic process|primary metabolic process|intracellular membrane-bounded organelle|ribonucleoprotein complex binding|protein metabolic process|nucleic acid binding|cytoplasm|peptide metabolic process|gene expression|plastid stroma|cellular protein metabolic process|ribosome binding|RNA binding…	-	-	-	-	chr2:19936683-19940408	2.02387	8.584	2.08453	0.000334056	0.00554385	UP
107411806	LOC107411806	receptor-like protein 12	GO:0005576|GO:0023052|GO:0050896|GO:0003824|GO:0016740|GO:0006950|GO:0051716|GO:0007165|GO:0006952|GO:0016772|GO:0007154|GO:0016301	extracellular region|signaling|response to stimulus|catalytic activity|transferase activity|response to stress|cellular response to stimulus|signal transduction|defense response|transferase activity, transferring phosphorus-containing groups|cell communication|kinase activity	-	-	-	-	chr2:20465354-20469451	0.0138876	0.38115	4.77849	0.00302968	0.0319836	UP
107411841	LOC107411841	asparagine--tRNA ligase, cytoplasmic 1-like	GO:0032502|GO:0005623|GO:0000003|GO:0050896|GO:0008152|GO:0003824|GO:0003006|GO:0005622|GO:0044237|GO:0016874|GO:0009058|GO:0006807|GO:0044238|GO:0009791|GO:0043231|GO:0044281|GO:0007275|GO:0019538|GO:0003676|GO:0006139|GO:0006725|GO:0005737|GO:0048316|GO:0006520|GO:0009793|GO:0000166|GO:0006518|GO:0005829|GO:0010154|GO:0010467|GO:0017076|GO:0003677|GO:0009790|GO:0044267|GO:0010038|GO:0005739|GO:…	developmental process|cell|reproduction|response to stimulus|metabolic process|catalytic activity|developmental process involved in reproduction|intracellular|cellular metabolic process|ligase activity|biosynthetic process|nitrogen compound metabolic process|primary metabolic process|post-embryonic development|intracellular membrane-bounded organelle|small molecule metabolic process|multicellular…	-	-	ko00970	Aminoacyl-tRNA biosynthesis	chr2:21032331-21035564	15.8917	108.622	2.77297	7.55019e-14	1.63679e-11	UP
107411842	LOC107411842	exportin-2-like	-	-	-	-	-	-	chr2:21036224-21039205	0.560263	7.27715	3.6992	3.84972e-08	2.38181e-06	UP
107411843	LOC107411843	asparagine--tRNA ligase, cytoplasmic 3-like	GO:0032502|GO:0005623|GO:0000003|GO:0050896|GO:0008152|GO:0003824|GO:0003006|GO:0005622|GO:0044237|GO:0016874|GO:0009058|GO:0006807|GO:0044238|GO:0009791|GO:0043231|GO:0044281|GO:0007275|GO:0019538|GO:0003676|GO:0006139|GO:0006725|GO:0005737|GO:0048316|GO:0006520|GO:0009793|GO:0000166|GO:0006518|GO:0005829|GO:0010154|GO:0010467|GO:0017076|GO:0003677|GO:0009790|GO:0044267|GO:0010038|GO:0005739|GO:…	developmental process|cell|reproduction|response to stimulus|metabolic process|catalytic activity|developmental process involved in reproduction|intracellular|cellular metabolic process|ligase activity|biosynthetic process|nitrogen compound metabolic process|primary metabolic process|post-embryonic development|intracellular membrane-bounded organelle|small molecule metabolic process|multicellular…	-	-	ko00970	Aminoacyl-tRNA biosynthesis	chr2:21040805-21043875	6.37074	50.4426	2.98511	1.38853e-13	2.75029e-11	UP
107411844	LOC107411844	exportin-2-like	-	-	-	-	-	-	chr2:21044527-21047314	0.274433	5.08931	4.21295	1.46419e-08	1.02511e-06	UP
107411878	LOC107411878	putative F-box protein At3g24700	GO:0005623|GO:0005622|GO:0005737	cell|intracellular|cytoplasm	-	-	-	-	chr2:21067492-21068823	1.31382	5.95082	2.17932	0.000701775	0.0101691	UP
107411909	LOC107411909	uncharacterized LOC107411909	GO:0005623|GO:0003824|GO:0016740|GO:0005622|GO:0012505|GO:0043231|GO:0005737|GO:0005794|GO:0008168	cell|catalytic activity|transferase activity|intracellular|endomembrane system|intracellular membrane-bounded organelle|cytoplasm|Golgi apparatus|methyltransferase activity	-	-	-	-	chr2:21471006-21472445	4.22288	0.374825	-3.49394	7.8833e-05	0.00168512	DOWN
107411934	LOC107411934	mediator of RNA polymerase II transcription subunit 37a-like	GO:0005623|GO:0005622|GO:0012505|GO:0043231|GO:0005737|GO:0005783	cell|intracellular|endomembrane system|intracellular membrane-bounded organelle|cytoplasm|endoplasmic reticulum	-	-	ko04141|ko03060	Protein processing in endoplasmic reticulum|Protein export	chr2:21377178-21380028	0.174565	10.3023	5.88306	1.8243e-16	6.20081e-14	UP
107411965	LOC107411965	piezo-type mechanosensitive ion channel homolog	GO:0051179|GO:0016020|GO:0005215|GO:0031224|GO:0022857|GO:0016021|GO:0006810|GO:0022891|GO:0055085|GO:0006811|GO:0015075|GO:0034220|GO:0015267|GO:0016192|GO:0006897|GO:0005216|GO:0008381|GO:0044351	localization|membrane|transporter activity|intrinsic component of membrane|transmembrane transporter activity|integral component of membrane|transport|substrate-specific transmembrane transporter activity|transmembrane transport|ion transport|ion transmembrane transporter activity|ion transmembrane transport|channel activity|vesicle-mediated transport|endocytosis|ion channel activity|mechanically…	-	-	-	-	chr2:22212714-22223935	2.0365	0.103018	-4.30512	2.90931e-07	1.40279e-05	DOWN
107411980	LOC107411980	kinesin-like protein KIFC3	GO:0005623|GO:0003824|GO:0016787|GO:0005622|GO:0043234|GO:0005875|GO:0016817|GO:0007017|GO:0016818|GO:0005856|GO:0005871|GO:0007018|GO:0015630|GO:0016462|GO:0017111|GO:0016887|GO:0003774|GO:0003777	cell|catalytic activity|hydrolase activity|intracellular|protein complex|microtubule associated complex|hydrolase activity, acting on acid anhydrides|microtubule-based process|hydrolase activity, acting on acid anhydrides, in phosphorus-containing anhydrides|cytoskeleton|kinesin complex|microtubule-based movement|microtubule cytoskeleton|pyrophosphatase activity|nucleoside-triphosphatase activity…	-	-	-	-	chr2:21798012-21802810	9.26381	2.24347	-2.04587	1.24538e-05	0.000354212	DOWN
107411995	LOC107411995	vacuolar iron transporter homolog 4-like	GO:0051179|GO:0016020|GO:0005215|GO:0050896|GO:0051641|GO:0051716|GO:0022857|GO:0006810|GO:0019725|GO:0070887|GO:0022891|GO:0055085|GO:0006811|GO:0015075|GO:0006880|GO:0034220|GO:0010039|GO:0010038|GO:0006873|GO:0006812|GO:0008324|GO:0071281|GO:0098655|GO:0071248|GO:0030001|GO:0030003|GO:0006875|GO:0071421|GO:0034755|GO:0046873|GO:0000041|GO:0006826|GO:0046916|GO:0006828|GO:0030026|GO:0055071|GO:…	localization|membrane|transporter activity|response to stimulus|cellular localization|cellular response to stimulus|transmembrane transporter activity|transport|cellular homeostasis|cellular response to chemical stimulus|substrate-specific transmembrane transporter activity|transmembrane transport|ion transport|ion transmembrane transporter activity|intracellular sequestering of iron ion|ion tran…	-	-	-	-	chr2:22062068-22064363	2.14012	0.186243	-3.52244	4.32992e-05	0.0010189	DOWN
107412045	LOC107412045	sugar transporter ERD6-like 5	GO:0051179|GO:0016020|GO:0005623|GO:0005215|GO:0071944|GO:0022857|GO:0005886|GO:0006810|GO:0022891|GO:0055085|GO:0015144|GO:0006811|GO:0015075|GO:0034220|GO:0051119|GO:0006812|GO:0015293|GO:0008324|GO:0098655|GO:0015294|GO:0005351	localization|membrane|cell|transporter activity|cell periphery|transmembrane transporter activity|plasma membrane|transport|substrate-specific transmembrane transporter activity|transmembrane transport|carbohydrate transmembrane transporter activity|ion transport|ion transmembrane transporter activity|ion transmembrane transport|sugar transmembrane transporter activity|cation transport|symporter …	-	-	-	-	chr2:22295005-22298989	3.76878	0.293176	-3.68426	5.60342e-06	0.000183005	DOWN
107412048	LOC107412048	sugar transporter ERD6-like 3	GO:0051179|GO:0016020|GO:0005623|GO:0005215|GO:0050896|GO:0031224|GO:0006950|GO:0005622|GO:0071944|GO:0022857|GO:0012505|GO:0005886|GO:0009725|GO:0043231|GO:0016021|GO:0006970|GO:0006810|GO:0005737|GO:0022891|GO:0005783|GO:0005887|GO:0055085|GO:0009415|GO:0009414|GO:0015144|GO:0031226|GO:0071702|GO:0006811|GO:0015075|GO:0008643|GO:0009737|GO:0034220|GO:0034219|GO:0051119|GO:0010200|GO:0009651|GO:…	localization|membrane|cell|transporter activity|response to stimulus|intrinsic component of membrane|response to stress|intracellular|cell periphery|transmembrane transporter activity|endomembrane system|plasma membrane|response to hormone|intracellular membrane-bounded organelle|integral component of membrane|response to osmotic stress|transport|cytoplasm|substrate-specific transmembrane transpo…	-	-	-	-	chr2:22332980-22340388	3.51958	0.239942	-3.87465	0.00148058	0.0182386	DOWN
107412088	LOC107412088	protein BONZAI 3-like	GO:0016020|GO:0005623|GO:0050896|GO:0008289|GO:0006950|GO:0071944|GO:0005886|GO:0060548|GO:0008219|GO:0031349|GO:0006952|GO:0019725|GO:0005543|GO:0005544|GO:0031347|GO:0010186	membrane|cell|response to stimulus|lipid binding|response to stress|cell periphery|plasma membrane|negative regulation of cell death|cell death|positive regulation of defense response|defense response|cellular homeostasis|phospholipid binding|calcium-dependent phospholipid binding|regulation of defense response|positive regulation of cellular defense response	-	-	-	-	chr2:22616846-22623139	8.79646	43.8974	2.31914	5.30601e-08	3.19661e-06	UP
107412108	LOC107412108	FRIGIDA-like protein 5	GO:0005623|GO:0005622|GO:0005737|GO:0005829	cell|intracellular|cytoplasm|cytosol	-	-	-	-	chr2:22857240-22862856	0.343304	1.76599	2.36292	0.00039093	0.00633495	UP
107412114	LOC107412114	bifunctional 3-dehydroquinate dehydratase/shikimate dehydrogenase, chloroplastic-like	-	-	-	-	-	-	chr2:22820039-22825331	1.13462	4.69648	2.04938	0.000301744	0.00510629	UP
107412130	LOC107412130	pathogenesis-related protein P2-like	GO:0005576|GO:0005623|GO:0050896|GO:0008152|GO:0003824|GO:0016787|GO:0006950|GO:0005622|GO:0044237|GO:0031640|GO:0009607|GO:0006807|GO:0051707|GO:0044238|GO:0006955|GO:0009725|GO:0009615|GO:0009620|GO:0043231|GO:0006970|GO:0006952|GO:0006139|GO:0008061|GO:0016798|GO:0006725|GO:0016788|GO:0005737|GO:0080027|GO:0045087|GO:0009723|GO:0009814|GO:0004518|GO:0005773|GO:0009651|GO:0050832|GO:0016070|GO:…	extracellular region|cell|response to stimulus|metabolic process|catalytic activity|hydrolase activity|response to stress|intracellular|cellular metabolic process|killing of cells of other organism|response to biotic stimulus|nitrogen compound metabolic process|response to other organism|primary metabolic process|immune response|response to hormone|response to virus|response to fungus|intracellul…	-	-	-	-	chr2:23249070-23249674	1.54276	36.3048	4.55658	1.81199e-09	1.58373e-07	UP
107412131	LOC107412131	aspartic proteinase CDR1-like	-	-	-	-	-	-	chr2:23296699-23302913	4.09163	0.476043	-3.10351	7.6797e-05	0.00164671	DOWN
107412144	LOC107412144	uncharacterized LOC107412144	-	-	-	-	-	-	chr1:5424675-5426613	0.225246	5.62721	4.64285	4.10287e-07	1.89213e-05	UP
107412146	LOC107412146	xyloglucan endotransglucosylase/hydrolase protein 22-like	GO:0005576|GO:0005623|GO:0050896|GO:0008152|GO:0003824|GO:0016787|GO:0016740|GO:0006950|GO:0071554|GO:0005622|GO:0044237|GO:0071944|GO:0012505|GO:0044238|GO:0048046|GO:0009725|GO:0042546|GO:0009408|GO:0005618|GO:0043231|GO:0009266|GO:0009612|GO:0016757|GO:0044262|GO:0009409|GO:0016798|GO:0005737|GO:0071669|GO:0005975|GO:0071555|GO:0005794|GO:0009664|GO:0009733|GO:0009536|GO:0016758|GO:0005976|GO:…	extracellular region|cell|response to stimulus|metabolic process|catalytic activity|hydrolase activity|transferase activity|response to stress|cell wall organization or biogenesis|intracellular|cellular metabolic process|cell periphery|endomembrane system|primary metabolic process|apoplast|response to hormone|cell wall biogenesis|response to heat|cell wall|intracellular membrane-bounded organelle…	-	-	ko04075	Plant hormone signal transduction	chr1:593485-594748	12.1921	1.32112	-3.20611	3.33847e-07	1.57658e-05	DOWN
107412151	LOC107412151	pathogenesis-related protein PR-4-like	GO:0005576|GO:0005623|GO:0050896|GO:0008152|GO:0003824|GO:0016787|GO:0006950|GO:0005622|GO:0044237|GO:0031640|GO:0009607|GO:0006807|GO:0051707|GO:0044238|GO:0006955|GO:0009725|GO:0009615|GO:0009620|GO:0043231|GO:0006970|GO:0006952|GO:0006139|GO:0008061|GO:0016798|GO:0006725|GO:0016788|GO:0005737|GO:0080027|GO:0045087|GO:0009723|GO:0009814|GO:0004518|GO:0005773|GO:0009651|GO:0050832|GO:0016070|GO:…	extracellular region|cell|response to stimulus|metabolic process|catalytic activity|hydrolase activity|response to stress|intracellular|cellular metabolic process|killing of cells of other organism|response to biotic stimulus|nitrogen compound metabolic process|response to other organism|primary metabolic process|immune response|response to hormone|response to virus|response to fungus|intracellul…	-	-	-	-	chr2:23283762-23290110	0.191694	1.76626	3.20382	0.000253825	0.00445683	UP
107412153	LOC107412153	pathogenesis-related protein PR-4-like	GO:0005576|GO:0005623|GO:0050896|GO:0008152|GO:0003824|GO:0016787|GO:0006950|GO:0005622|GO:0044237|GO:0031640|GO:0009607|GO:0006807|GO:0051707|GO:0044238|GO:0006955|GO:0009725|GO:0009615|GO:0009620|GO:0043231|GO:0006970|GO:0006952|GO:0006139|GO:0008061|GO:0016798|GO:0006725|GO:0016788|GO:0005737|GO:0080027|GO:0045087|GO:0009723|GO:0009814|GO:0004518|GO:0005773|GO:0009651|GO:0050832|GO:0016070|GO:…	extracellular region|cell|response to stimulus|metabolic process|catalytic activity|hydrolase activity|response to stress|intracellular|cellular metabolic process|killing of cells of other organism|response to biotic stimulus|nitrogen compound metabolic process|response to other organism|primary metabolic process|immune response|response to hormone|response to virus|response to fungus|intracellul…	-	-	-	-	chr2:23286974-23287833	1.55483	21.0089	3.75617	5.26698e-08	3.18979e-06	UP
107412171	LOC107412171	GRF1-interacting factor 1	GO:0032502|GO:0005623|GO:0008152|GO:0008283|GO:0000989|GO:0005622|GO:0044237|GO:0009058|GO:0006807|GO:0044238|GO:0005515|GO:0003712|GO:0043231|GO:0007275|GO:0006139|GO:0007389|GO:0006725|GO:0048367|GO:0019438|GO:0010467|GO:0005634|GO:0003713|GO:0048827|GO:0010468|GO:0051252|GO:0003002|GO:0016070|GO:0048366|GO:0032774|GO:0006351|GO:2001141|GO:0006355|GO:0009955|GO:1903506	developmental process|cell|metabolic process|cell proliferation|transcription factor activity, transcription factor binding|intracellular|cellular metabolic process|biosynthetic process|nitrogen compound metabolic process|primary metabolic process|protein binding|transcription cofactor activity|intracellular membrane-bounded organelle|multicellular organism development|nucleobase-containing compo…	-	-	-	-	chr2:23438335-23442747	5.69062	1.20529	-2.2392	0.00373256	0.037656	DOWN
107412187	LOC107412187	protein tesmin/TSO1-like CXC 3	GO:0032502|GO:0005623|GO:0000003|GO:0003006|GO:0003700|GO:0009653|GO:0005622|GO:0050793|GO:2000026|GO:0009791|GO:0009887|GO:0043231|GO:0007275|GO:0048569|GO:0051302|GO:0043169|GO:0048437|GO:0048444|GO:0009886|GO:0022603|GO:0048513|GO:0051301|GO:0048367|GO:0005634|GO:0048507|GO:0009933|GO:0009908|GO:0046872|GO:0009934|GO:0048509	developmental process|cell|reproduction|developmental process involved in reproduction|transcription factor activity, sequence-specific DNA binding|anatomical structure morphogenesis|intracellular|regulation of developmental process|regulation of multicellular organismal development|post-embryonic development|organ morphogenesis|intracellular membrane-bounded organelle|multicellular organism deve…	-	-	-	-	chr2:22982848-22987835	5.94886	1.34206	-2.14816	3.53486e-05	0.000855199	DOWN
107412204	LOC107412204	GDP-mannose 3,5-epimerase 2	GO:0005623|GO:0008152|GO:0003824|GO:0016853|GO:0005622|GO:0044237|GO:0048037|GO:0009058|GO:0006807|GO:0044238|GO:0016854|GO:0044281|GO:0006139|GO:0006725|GO:0005737|GO:1901135|GO:0005975|GO:0050662|GO:0000166|GO:0016051|GO:0005996|GO:0005829|GO:0051287|GO:0009225|GO:0006766|GO:0019752|GO:0019853|GO:0047918|GO:0006767	cell|metabolic process|catalytic activity|isomerase activity|intracellular|cellular metabolic process|cofactor binding|biosynthetic process|nitrogen compound metabolic process|primary metabolic process|racemase and epimerase activity|small molecule metabolic process|nucleobase-containing compound metabolic process|cellular aromatic compound metabolic process|cytoplasm|carbohydrate derivative meta…	-	-	ko01100|ko01110|ko00520|ko00053	Metabolic pathways|Biosynthesis of secondary metabolites|Amino sugar and nucleotide sugar metabolism|Ascorbate and aldarate metabolism	chr2:23163977-23167814	236.399	39.9271	-2.56578	0.000158345	0.00300658	DOWN
107412216	LOC107412216	aquaporin NIP1-2-like	GO:0051179|GO:0016020|GO:0005623|GO:0005215|GO:0050896|GO:0005622|GO:0071944|GO:0022857|GO:0005886|GO:0006810|GO:0005737|GO:0022891|GO:0055085|GO:0046685|GO:0006811|GO:0015075|GO:0034220|GO:0015267|GO:0005372|GO:0080170|GO:0008509|GO:0015250|GO:0098656|GO:0006820|GO:0015103|GO:0015105|GO:0015700	localization|membrane|cell|transporter activity|response to stimulus|intracellular|cell periphery|transmembrane transporter activity|plasma membrane|transport|cytoplasm|substrate-specific transmembrane transporter activity|transmembrane transport|response to arsenic-containing substance|ion transport|ion transmembrane transporter activity|ion transmembrane transport|channel activity|water transme…	-	-	-	-	chr1:5374800-5377300	1.64234	7.91804	2.26939	0.000145165	0.00279489	UP
107412217	LOC107412217	uncharacterized LOC107412217	GO:0051179|GO:0016020|GO:0005623|GO:0051641|GO:0031224|GO:0005622|GO:0043234|GO:0005515|GO:0016021|GO:0006810|GO:0005484|GO:0031201|GO:0008104|GO:0005737|GO:0071702|GO:0016050|GO:0061025|GO:0016192|GO:0046907|GO:0034613|GO:0015031|GO:0006886|GO:0006906	localization|membrane|cell|cellular localization|intrinsic component of membrane|intracellular|protein complex|protein binding|integral component of membrane|transport|SNAP receptor activity|SNARE complex|protein localization|cytoplasm|organic substance transport|vesicle organization|membrane fusion|vesicle-mediated transport|intracellular transport|cellular protein localization|protein transport…	-	-	-	-	chr2:22964005-22967735	8.41551	2.08241	-2.01479	0.00153001	0.0187136	DOWN
107412223	LOC107412223	uncharacterized LOC107412223	-	-	-	-	-	-	chr1:5546259-5546843	3.41111	17.1476	2.32969	0.00143546	0.0178104	UP
107412226	LOC107412226	receptor-like protein kinase ANXUR2	GO:0032502|GO:0016020|GO:0005623|GO:0000003|GO:0040007|GO:0003824|GO:0003006|GO:0016740|GO:0042995|GO:0009653|GO:0071944|GO:0016049|GO:0048589|GO:0005886|GO:0030427|GO:0045177|GO:0060560|GO:0009856|GO:0090406|GO:0009826|GO:0016324|GO:0090404|GO:0009860|GO:0016772|GO:0048869|GO:0048868|GO:0000904|GO:0009932|GO:0030154|GO:0016301|GO:0000902	developmental process|membrane|cell|reproduction|growth|catalytic activity|developmental process involved in reproduction|transferase activity|cell projection|anatomical structure morphogenesis|cell periphery|cell growth|developmental growth|plasma membrane|site of polarized growth|apical part of cell|developmental growth involved in morphogenesis|pollination|pollen tube|unidimensional cell growt…	-	-	-	-	chr2:23321734-23325037	4.47332	0.913003	-2.29265	0.000833799	0.0115827	DOWN
107412261	LOC107412261	uncharacterized LOC107412261	GO:0005623|GO:0005622|GO:0043231|GO:0005634	cell|intracellular|intracellular membrane-bounded organelle|nucleus	-	-	-	-	chr2:23643039-23644563	8.38592	1.68065	-2.31895	0.000143447	0.00276761	DOWN
107412275	LOC107412275	bifunctional L-3-cyanoalanine synthase/cysteine synthase D1-like	GO:0008152|GO:0003824|GO:0016740|GO:0044237|GO:0009058|GO:0006807|GO:0044238|GO:0016829|GO:0016846|GO:0044281|GO:0006790|GO:0006520|GO:0050017|GO:0008652|GO:0004124|GO:0009069|GO:0019752|GO:0006534|GO:0009070|GO:0019344	metabolic process|catalytic activity|transferase activity|cellular metabolic process|biosynthetic process|nitrogen compound metabolic process|primary metabolic process|lyase activity|carbon-sulfur lyase activity|small molecule metabolic process|sulfur compound metabolic process|cellular amino acid metabolic process|L-3-cyanoalanine synthase activity|cellular amino acid biosynthetic process|cystei…	-	-	ko01100|ko01110|ko01130|ko01120|ko01230|ko01200|ko00270|ko00920	Metabolic pathways|Biosynthesis of secondary metabolites|Biosynthesis of antibiotics|Microbial metabolism in diverse environments|Biosynthesis of amino acids|Carbon metabolism|Cysteine and methionine metabolism|Sulfur metabolism	chr2:23752051-23753090	5.0645	0.714713	-2.82498	0.003839	0.0384207	DOWN
107412289	LOC107412289	polygalacturonase At1g48100-like	GO:0005576|GO:0008152|GO:0003824|GO:0016787|GO:0071554|GO:0044238|GO:0016829|GO:0016798|GO:0005975|GO:0071555|GO:0004553|GO:0004650	extracellular region|metabolic process|catalytic activity|hydrolase activity|cell wall organization or biogenesis|primary metabolic process|lyase activity|hydrolase activity, acting on glycosyl bonds|carbohydrate metabolic process|cell wall organization|hydrolase activity, hydrolyzing O-glycosyl compounds|polygalacturonase activity	-	-	-	-	chr2:24049499-24051463	4.39389	24.5011	2.47927	1.74109e-06	6.742e-05	UP
107412305	LOC107412305	uncharacterized LOC107412305	GO:0005623|GO:0005622|GO:0043231|GO:0005634	cell|intracellular|intracellular membrane-bounded organelle|nucleus	-	-	-	-	chr2:24075009-24076928	4.12378	0.372265	-3.46957	0.000120812	0.00239985	DOWN
107412335	LOC107412335	leucine-rich repeat receptor-like protein kinase PXL1	GO:0032502|GO:0016020|GO:0005623|GO:0000003|GO:0003824|GO:0003006|GO:0016740|GO:0071944|GO:0005886|GO:0009791|GO:0007275|GO:0048316|GO:0016772|GO:0009793|GO:0001944|GO:0010154|GO:0048507|GO:0009790|GO:0016301|GO:0010067	developmental process|membrane|cell|reproduction|catalytic activity|developmental process involved in reproduction|transferase activity|cell periphery|plasma membrane|post-embryonic development|multicellular organism development|seed development|transferase activity, transferring phosphorus-containing groups|embryo development ending in seed dormancy|vasculature development|fruit development|meri…	-	-	-	-	chr2:23975411-23978891	6.03881	0.0893089	-6.07932	4.24843e-07	1.95272e-05	DOWN
107412337	LOC107412337	uncharacterized LOC107412337	-	-	-	-	-	-	chr1:5525777-5526557	5.52119	0.580333	-3.25003	0.000515124	0.00794532	DOWN
107412346	LOC107412346	subtilisin-like protease SBT1.9	-	-	-	-	-	-	chr2:24563802-24566256	8.65327	47.2806	2.44993	1.26264e-08	9.07649e-07	UP
107412349	LOC107412349	subtilisin-like protease SBT1.9	GO:0005623|GO:0003824|GO:0016787|GO:0071944|GO:0005618|GO:0008233|GO:0008236|GO:0004175|GO:0004252	cell|catalytic activity|hydrolase activity|cell periphery|cell wall|peptidase activity|serine-type peptidase activity|endopeptidase activity|serine-type endopeptidase activity	-	-	-	-	chr2:24606738-24614761	0.714664	0.0944686	-2.91936	0.00369086	0.0373729	DOWN
107412375	LOC107412375	subtilisin-like protease SBT1.9	GO:0005623|GO:0003824|GO:0016787|GO:0071944|GO:0005618|GO:0008233|GO:0008236|GO:0004175|GO:0004252	cell|catalytic activity|hydrolase activity|cell periphery|cell wall|peptidase activity|serine-type peptidase activity|endopeptidase activity|serine-type endopeptidase activity	-	-	-	-	chr2:24620304-24622962	0.0439383	4.67031	6.73189	1.95535e-11	2.70527e-09	UP
107412389	LOC107412389	inactive disease resistance protein RPS4-like	GO:0023052|GO:0050896|GO:0006950|GO:0051716|GO:0007165|GO:0006952|GO:0007154|GO:0000166|GO:0017076|GO:0043531|GO:0030554	signaling|response to stimulus|response to stress|cellular response to stimulus|signal transduction|defense response|cell communication|nucleotide binding|purine nucleotide binding|ADP binding|adenyl nucleotide binding	-	-	-	-	chr2:25017850-25021222	2.36137	0.438422	-2.42923	0.000505147	0.00783975	DOWN
107412411	LOC107412411	disease resistance protein RPP4-like	GO:0023052|GO:0050896|GO:0006950|GO:0051716|GO:0007165|GO:0006952|GO:0007154|GO:0000166|GO:0017076|GO:0043531|GO:0030554	signaling|response to stimulus|response to stress|cellular response to stimulus|signal transduction|defense response|cell communication|nucleotide binding|purine nucleotide binding|ADP binding|adenyl nucleotide binding	-	-	-	-	chr2:25454733-25457206	0.889616	0.0374486	-4.5702	0.00203012	0.0233765	DOWN
107412420	LOC107412420	LRR receptor-like serine/threonine-protein kinase GSO2	GO:0016020|GO:0005623|GO:0030054|GO:0023052|GO:0004871|GO:0050896|GO:0008152|GO:0003824|GO:0016740|GO:0051716|GO:0044237|GO:0004872|GO:0009506|GO:0071944|GO:0005911|GO:0038023|GO:0044238|GO:0005886|GO:0005515|GO:0009725|GO:0004888|GO:0019899|GO:0007165|GO:0019538|GO:0070887|GO:0006793|GO:0001653|GO:0016772|GO:0007154|GO:0016773|GO:0019199|GO:0016301|GO:0007166|GO:0044267|GO:0006796|GO:0009755|GO:…	membrane|cell|cell junction|signaling|signal transducer activity|response to stimulus|metabolic process|catalytic activity|transferase activity|cellular response to stimulus|cellular metabolic process|receptor activity|plasmodesma|cell periphery|cell-cell junction|signaling receptor activity|primary metabolic process|plasma membrane|protein binding|response to hormone|transmembrane signaling rece…	-	-	-	-	chr2:25521809-25523903	0.199884	2.02228	3.33875	0.000173087	0.0032352	UP
107412454	LOC107412454	glucan endo-1,3-beta-glucosidase-like	GO:0016020|GO:0005623|GO:0050896|GO:0008152|GO:0003824|GO:0016787|GO:0031090|GO:0006950|GO:0005622|GO:0071944|GO:0009607|GO:0051707|GO:0044238|GO:0006955|GO:0098588|GO:0009620|GO:0005618|GO:0043231|GO:0009624|GO:0006970|GO:0006952|GO:0016798|GO:0005737|GO:0005975|GO:0045087|GO:0005774|GO:0009814|GO:0002215|GO:0005773|GO:0009651|GO:0050832|GO:0004553|GO:0009817	membrane|cell|response to stimulus|metabolic process|catalytic activity|hydrolase activity|organelle membrane|response to stress|intracellular|cell periphery|response to biotic stimulus|response to other organism|primary metabolic process|immune response|bounding membrane of organelle|response to fungus|cell wall|intracellular membrane-bounded organelle|response to nematode|response to osmotic st…	-	-	-	-	chr2:25640167-25641487	27.663	260.639	3.23602	4.33313e-06	0.000147831	UP
107412472	LOC107412472	glucan endo-1,3-beta-glucosidase-like	GO:0005576|GO:0008152|GO:0003824|GO:0016787|GO:0044238|GO:0016798|GO:0005975|GO:0004553	extracellular region|metabolic process|catalytic activity|hydrolase activity|primary metabolic process|hydrolase activity, acting on glycosyl bonds|carbohydrate metabolic process|hydrolase activity, hydrolyzing O-glycosyl compounds	-	-	-	-	chr2:25612968-25614176	3.33688	51.7733	3.95564	4.20247e-10	4.46727e-08	UP
107412485	LOC107412485	AP2-like ethylene-responsive transcription factor BBM	GO:0032502|GO:0005623|GO:0008152|GO:0003700|GO:0009653|GO:0005622|GO:0044237|GO:0009058|GO:0006807|GO:0044238|GO:0009887|GO:0043231|GO:0007275|GO:0003676|GO:0006139|GO:0006725|GO:0048513|GO:0019438|GO:0010467|GO:0005634|GO:0003677|GO:0010468|GO:0051252|GO:0016070|GO:0032774|GO:0006351|GO:2001141|GO:0006355|GO:1903506	developmental process|cell|metabolic process|transcription factor activity, sequence-specific DNA binding|anatomical structure morphogenesis|intracellular|cellular metabolic process|biosynthetic process|nitrogen compound metabolic process|primary metabolic process|organ morphogenesis|intracellular membrane-bounded organelle|multicellular organism development|nucleic acid binding|nucleobase-contai…	-	-	-	-	chr2:26324489-26328344	9.92502	0.75209	-3.72209	6.09838e-08	3.5953e-06	DOWN
107412539	LOC107412539	peroxidase 59	GO:0005576|GO:0005623|GO:0016209|GO:0050896|GO:0008152|GO:0003824|GO:0016491|GO:0004601|GO:0006950|GO:0005622|GO:0044237|GO:0043231|GO:0046906|GO:0006979|GO:0043169|GO:0005737|GO:0042744|GO:0055114|GO:0072593|GO:0005634|GO:0042743|GO:0046872|GO:0020037	extracellular region|cell|antioxidant activity|response to stimulus|metabolic process|catalytic activity|oxidoreductase activity|peroxidase activity|response to stress|intracellular|cellular metabolic process|intracellular membrane-bounded organelle|tetrapyrrole binding|response to oxidative stress|cation binding|cytoplasm|hydrogen peroxide catabolic process|oxidation-reduction process|reactive o…	-	-	ko01100|ko01110|ko00940	Metabolic pathways|Biosynthesis of secondary metabolites|Phenylpropanoid biosynthesis	chr2:26382865-26383792	40.0456	7.21276	-2.47302	0.000827476	0.0115294	DOWN
107412587	LOC107412587	protein DETOXIFICATION 42	GO:0051179|GO:0016020|GO:0005623|GO:0005215|GO:0050896|GO:0031224|GO:0071944|GO:0022857|GO:0005886|GO:0016021|GO:0015238|GO:0006810|GO:0042493|GO:0022891|GO:0055085|GO:0006855|GO:0071702|GO:0006811|GO:0015075|GO:0005342|GO:0015893|GO:0010038|GO:0015711|GO:0008509|GO:0010044|GO:0006820|GO:0015142|GO:0008514|GO:0015137|GO:0015746	localization|membrane|cell|transporter activity|response to stimulus|intrinsic component of membrane|cell periphery|transmembrane transporter activity|plasma membrane|integral component of membrane|drug transmembrane transporter activity|transport|response to drug|substrate-specific transmembrane transporter activity|transmembrane transport|drug transmembrane transport|organic substance transport…	-	-	-	-	chr2:26838344-26843283	21.403	4.55828	-2.23125	6.1996e-07	2.72229e-05	DOWN
107412591	LOC107412591	extensin-2-like	GO:0005576	extracellular region	-	-	-	-	chr2:26961032-26963235	1334.15	99.7329	-3.74171	9.66241e-15	2.55794e-12	DOWN
107412598	LOC107412598	transcription factor TCP2	GO:0032502|GO:0005623|GO:0008152|GO:0003700|GO:0009653|GO:0005622|GO:0044237|GO:0009058|GO:0006807|GO:0050793|GO:0044238|GO:0009887|GO:0043231|GO:0007275|GO:0003676|GO:0006139|GO:0006725|GO:0040034|GO:0048513|GO:0048869|GO:0010016|GO:0048367|GO:0019438|GO:0010467|GO:0005634|GO:0003677|GO:0030154|GO:0048827|GO:0010468|GO:0009965|GO:0051252|GO:0016070|GO:0045962|GO:0048366|GO:0032774|GO:0006351|GO:…	developmental process|cell|metabolic process|transcription factor activity, sequence-specific DNA binding|anatomical structure morphogenesis|intracellular|cellular metabolic process|biosynthetic process|nitrogen compound metabolic process|regulation of developmental process|primary metabolic process|organ morphogenesis|intracellular membrane-bounded organelle|multicellular organism development|nu…	-	-	-	-	chr1:5724068-5731711	10.2916	2.45247	-2.06917	9.49765e-05	0.00197499	DOWN
107412606	LOC107412606	origin of replication complex subunit 1B-like	GO:0005623|GO:0008152|GO:0005622|GO:0044237|GO:0009058|GO:0006807|GO:0044238|GO:0043234|GO:0005515|GO:0003682|GO:0043231|GO:0043169|GO:0003676|GO:0006139|GO:0006725|GO:0000808|GO:0000166|GO:0005694|GO:0019438|GO:0010467|GO:0017076|GO:0005634|GO:0003677|GO:0046872|GO:0010468|GO:0006259|GO:0051252|GO:0016070|GO:0005524|GO:0006260|GO:0032774|GO:0006351|GO:0003690|GO:2001141|GO:0030554|GO:0006355|GO:…	cell|metabolic process|intracellular|cellular metabolic process|biosynthetic process|nitrogen compound metabolic process|primary metabolic process|protein complex|protein binding|chromatin binding|intracellular membrane-bounded organelle|cation binding|nucleic acid binding|nucleobase-containing compound metabolic process|cellular aromatic compound metabolic process|origin recognition complex|nucl…	-	-	ko04110|ko04111|ko04113	Cell cycle|Cell cycle - yeast|Meiosis - yeast	chr2:26914881-26919991	7.26344	1.43388	-2.34073	1.31528e-05	0.000371789	DOWN
107412632	LOC107412632	G-type lectin S-receptor-like serine/threonine-protein kinase RLK1	GO:0016020|GO:0005623|GO:0030054|GO:0023052|GO:0004871|GO:0050896|GO:0008152|GO:0003824|GO:0016740|GO:0051716|GO:0044237|GO:0004872|GO:0009506|GO:0071944|GO:0005911|GO:0038023|GO:0044238|GO:0005886|GO:0005515|GO:0009725|GO:0004888|GO:0019899|GO:0007165|GO:0019538|GO:0070887|GO:0006793|GO:0001653|GO:0016772|GO:0007154|GO:0016773|GO:0019199|GO:0016301|GO:0007166|GO:0044267|GO:0006796|GO:0009755|GO:…	membrane|cell|cell junction|signaling|signal transducer activity|response to stimulus|metabolic process|catalytic activity|transferase activity|cellular response to stimulus|cellular metabolic process|receptor activity|plasmodesma|cell periphery|cell-cell junction|signaling receptor activity|primary metabolic process|plasma membrane|protein binding|response to hormone|transmembrane signaling rece…	-	-	-	-	chr2:27375828-27378844	0.146582	3.76062	4.68119	2.37e-07	1.17994e-05	UP
107412640	LOC107412640	beta-glucosidase 12-like	GO:0003824|GO:0016787|GO:0016798|GO:0004553|GO:0033907|GO:0047701|GO:0015926|GO:0004565|GO:0008422|GO:0004338|GO:0080083	catalytic activity|hydrolase activity|hydrolase activity, acting on glycosyl bonds|hydrolase activity, hydrolyzing O-glycosyl compounds|beta-D-fucosidase activity|beta-L-arabinosidase activity|glucosidase activity|beta-galactosidase activity|beta-glucosidase activity|glucan exo-1,3-beta-glucosidase activity|beta-gentiobiose beta-glucosidase activity	-	-	ko01100|ko01110|ko00500|ko00940|ko00460	Metabolic pathways|Biosynthesis of secondary metabolites|Starch and sucrose metabolism|Phenylpropanoid biosynthesis|Cyanoamino acid metabolism	chr2:27294888-27300272	9.71371	67.2212	2.79082	1.69539e-08	1.16113e-06	UP
107412642	LOC107412642	G-type lectin S-receptor-like serine/threonine-protein kinase RLK1	GO:0016020|GO:0005623|GO:0030054|GO:0023052|GO:0004871|GO:0050896|GO:0008152|GO:0003824|GO:0016740|GO:0051716|GO:0044237|GO:0004872|GO:0009506|GO:0071944|GO:0005911|GO:0038023|GO:0044238|GO:0005886|GO:0005515|GO:0009725|GO:0004888|GO:0019899|GO:0007165|GO:0019538|GO:0070887|GO:0006793|GO:0001653|GO:0016772|GO:0007154|GO:0016773|GO:0019199|GO:0016301|GO:0007166|GO:0044267|GO:0006796|GO:0009755|GO:…	membrane|cell|cell junction|signaling|signal transducer activity|response to stimulus|metabolic process|catalytic activity|transferase activity|cellular response to stimulus|cellular metabolic process|receptor activity|plasmodesma|cell periphery|cell-cell junction|signaling receptor activity|primary metabolic process|plasma membrane|protein binding|response to hormone|transmembrane signaling rece…	-	-	-	-	chr2:27358556-27360949	4.65084	0.682817	-2.76792	2.80066e-05	0.000700497	DOWN
107412650	LOC107412650	G-type lectin S-receptor-like serine/threonine-protein kinase RLK1	-	-	-	-	-	-	chr2:27402249-27404789	1.00394	4.50326	2.1653	0.00271511	0.0294301	UP
107412665	LOC107412665	G-type lectin S-receptor-like serine/threonine-protein kinase RLK1	GO:0016020|GO:0005623|GO:0030054|GO:0023052|GO:0004871|GO:0050896|GO:0008152|GO:0003824|GO:0016740|GO:0051716|GO:0044237|GO:0004872|GO:0009506|GO:0071944|GO:0005911|GO:0038023|GO:0044238|GO:0005886|GO:0005515|GO:0009725|GO:0004888|GO:0019899|GO:0007165|GO:0019538|GO:0070887|GO:0006793|GO:0001653|GO:0016772|GO:0007154|GO:0016773|GO:0019199|GO:0016301|GO:0007166|GO:0044267|GO:0006796|GO:0009755|GO:…	membrane|cell|cell junction|signaling|signal transducer activity|response to stimulus|metabolic process|catalytic activity|transferase activity|cellular response to stimulus|cellular metabolic process|receptor activity|plasmodesma|cell periphery|cell-cell junction|signaling receptor activity|primary metabolic process|plasma membrane|protein binding|response to hormone|transmembrane signaling rece…	-	-	-	-	chr2:27348981-27351584	1.54649	0.0290252	-5.73555	0.00195265	0.0227124	DOWN
107412673	LOC107412673	G-type lectin S-receptor-like serine/threonine-protein kinase RLK1	GO:0016020|GO:0005623|GO:0030054|GO:0023052|GO:0004871|GO:0050896|GO:0008152|GO:0003824|GO:0016740|GO:0051716|GO:0044237|GO:0004872|GO:0009506|GO:0071944|GO:0005911|GO:0038023|GO:0044238|GO:0005886|GO:0005515|GO:0009725|GO:0004888|GO:0019899|GO:0007165|GO:0019538|GO:0070887|GO:0006793|GO:0001653|GO:0016772|GO:0007154|GO:0016773|GO:0019199|GO:0016301|GO:0007166|GO:0044267|GO:0006796|GO:0009755|GO:…	membrane|cell|cell junction|signaling|signal transducer activity|response to stimulus|metabolic process|catalytic activity|transferase activity|cellular response to stimulus|cellular metabolic process|receptor activity|plasmodesma|cell periphery|cell-cell junction|signaling receptor activity|primary metabolic process|plasma membrane|protein binding|response to hormone|transmembrane signaling rece…	-	-	-	-	chr2:27406643-27409380	2.75331	17.0408	2.62976	9.47691e-08	5.30322e-06	UP
107412676	LOC107412676	extensin-2-like	GO:0005576|GO:0005623|GO:0005198|GO:0071554|GO:0071944|GO:0005199|GO:0005618|GO:0071669|GO:0071555|GO:0009505|GO:0009664|GO:0009530	extracellular region|cell|structural molecule activity|cell wall organization or biogenesis|cell periphery|structural constituent of cell wall|cell wall|plant-type cell wall organization or biogenesis|cell wall organization|plant-type cell wall|plant-type cell wall organization|primary cell wall	-	-	-	-	chr2:27517524-27519467	493.252	71.4842	-2.78663	3.04788e-14	7.23399e-12	DOWN
107412689	LOC107412689	lachrymatory-factor synthase-like	GO:0005623|GO:0023052|GO:0050896|GO:0008152|GO:0008289|GO:0030234|GO:0051716|GO:0005622|GO:0009892|GO:0044237|GO:0004872|GO:0044238|GO:0009725|GO:0007165|GO:0043231|GO:0019538|GO:0010427|GO:0005737|GO:0070887|GO:0050790|GO:0043177|GO:0006793|GO:0004857|GO:0007154|GO:0043086|GO:0009737|GO:0051246|GO:0031406|GO:0005634|GO:0044267|GO:0006796|GO:0009755|GO:0004864|GO:0009738|GO:0016311|GO:0006464|GO:…	cell|signaling|response to stimulus|metabolic process|lipid binding|enzyme regulator activity|cellular response to stimulus|intracellular|negative regulation of metabolic process|cellular metabolic process|receptor activity|primary metabolic process|response to hormone|signal transduction|intracellular membrane-bounded organelle|protein metabolic process|abscisic acid binding|cytoplasm|cellular r…	-	-	-	-	chr2:27633914-27634432	2.06946	32.8553	3.9888	1.16966e-09	1.07344e-07	UP
107412701	LOC107412701	leucine-rich repeat receptor-like serine/threonine-protein kinase BAM3	GO:0016020|GO:0005623|GO:0023052|GO:0050896|GO:0051716|GO:0071944|GO:0005886|GO:0005515|GO:0007165|GO:0007154	membrane|cell|signaling|response to stimulus|cellular response to stimulus|cell periphery|plasma membrane|protein binding|signal transduction|cell communication	-	-	-	-	chr2:27661768-27663084	1.92237	0.122004	-3.97789	0.000930077	0.0126329	DOWN
107412713	LOC107412713	DNA-damage-repair/toleration protein DRT100-like	GO:0005576|GO:0016020|GO:0005623|GO:0030054|GO:0023052|GO:0050896|GO:0006950|GO:0051716|GO:0005622|GO:0009506|GO:0071944|GO:0005911|GO:0005886|GO:0048046|GO:0005618|GO:0007165|GO:0043231|GO:0006952|GO:0005737|GO:0007154|GO:0009536|GO:0009507	extracellular region|membrane|cell|cell junction|signaling|response to stimulus|response to stress|cellular response to stimulus|intracellular|plasmodesma|cell periphery|cell-cell junction|plasma membrane|apoplast|cell wall|signal transduction|intracellular membrane-bounded organelle|defense response|cytoplasm|cell communication|plastid|chloroplast	-	-	-	-	chr2:27825141-27826826	4.6878	0.736305	-2.67054	0.000686223	0.0100282	DOWN
107412759	LOC107412759	annexin-like protein RJ4	GO:0005623|GO:0050896|GO:0008289|GO:0006950|GO:0005622|GO:0009408|GO:0043231|GO:0006970|GO:0009266|GO:0043169|GO:0009409|GO:0009415|GO:0009414|GO:0005543|GO:0005634|GO:0005544|GO:0046872|GO:0009651|GO:0005509	cell|response to stimulus|lipid binding|response to stress|intracellular|response to heat|intracellular membrane-bounded organelle|response to osmotic stress|response to temperature stimulus|cation binding|response to cold|response to water|response to water deprivation|phospholipid binding|nucleus|calcium-dependent phospholipid binding|metal ion binding|response to salt stress|calcium ion binding	-	-	-	-	chr3:336161-339576	7.09976	0.274832	-4.69115	9.57268e-06	0.000283698	DOWN
107412760	LOC107412760	metal tolerance protein 9-like	GO:0051179|GO:0016020|GO:0005215|GO:0050896|GO:0022857|GO:0006810|GO:0019725|GO:2000021|GO:0022891|GO:0061088|GO:0055085|GO:0032119|GO:0006811|GO:0015075|GO:0034220|GO:0010043|GO:0010038|GO:0006873|GO:0006812|GO:0008324|GO:0098655|GO:0030001|GO:0030003|GO:0006875|GO:0071577|GO:0046873|GO:0000041|GO:0006829|GO:0055069|GO:0006882|GO:0046916|GO:0005385	localization|membrane|transporter activity|response to stimulus|transmembrane transporter activity|transport|cellular homeostasis|regulation of ion homeostasis|substrate-specific transmembrane transporter activity|regulation of sequestering of zinc ion|transmembrane transport|sequestering of zinc ion|ion transport|ion transmembrane transporter activity|ion transmembrane transport|response to zinc…	-	-	-	-	chr3:525020-527244	75.7362	9.56593	-2.98501	0.00115962	0.0150101	DOWN
107412807	LOC107412807	ankyrin repeat-containing protein At5g02620-like	-	-	-	-	-	-	chr3:1232714-1233757	3.46014	0.42355	-3.03022	0.0045549	0.0435117	DOWN
107412832	LOC107412832	uncharacterized LOC107412832	GO:0043169|GO:0046872|GO:0046914|GO:0008270	cation binding|metal ion binding|transition metal ion binding|zinc ion binding	-	-	-	-	chr3:1540666-1541370	0.243489	3.04084	3.64254	0.00390546	0.0389443	UP
107412841	LOC107412841	cysteine-rich receptor-like protein kinase 25	GO:0005576|GO:0016020|GO:0005623|GO:0030054|GO:0050896|GO:0008152|GO:0003824|GO:0016740|GO:0006950|GO:0044237|GO:0009506|GO:0071944|GO:0005911|GO:0044238|GO:0005886|GO:0005515|GO:0019899|GO:0019538|GO:0006952|GO:0006793|GO:0016772|GO:0016773|GO:0016301|GO:0044267|GO:0006796|GO:0031625|GO:0006464|GO:0016310|GO:0004672|GO:0006468|GO:0004674	extracellular region|membrane|cell|cell junction|response to stimulus|metabolic process|catalytic activity|transferase activity|response to stress|cellular metabolic process|plasmodesma|cell periphery|cell-cell junction|primary metabolic process|plasma membrane|protein binding|enzyme binding|protein metabolic process|defense response|phosphorus metabolic process|transferase activity, transferring…	-	-	-	-	chr3:1351527-1353033	0.298452	2.08996	2.8079	0.00228343	0.0257653	UP
107412853	LOC107412853	cytochrome P450 84A1-like	GO:0016020|GO:0005623|GO:0050896|GO:0008152|GO:0003824|GO:0016491|GO:0031224|GO:0005622|GO:0044237|GO:0009058|GO:0012505|GO:0005515|GO:0043231|GO:0016021|GO:0016651|GO:0006725|GO:0005737|GO:0055114|GO:0005783|GO:0019748|GO:0004497|GO:0009314|GO:0009698|GO:0046424|GO:0009808|GO:0019438|GO:0009699|GO:0044550|GO:0009416|GO:0009809|GO:0009411|GO:0010224	membrane|cell|response to stimulus|metabolic process|catalytic activity|oxidoreductase activity|intrinsic component of membrane|intracellular|cellular metabolic process|biosynthetic process|endomembrane system|protein binding|intracellular membrane-bounded organelle|integral component of membrane|oxidoreductase activity, acting on NAD(P)H|cellular aromatic compound metabolic process|cytoplasm|oxi…	-	-	ko01100|ko01110|ko00940	Metabolic pathways|Biosynthesis of secondary metabolites|Phenylpropanoid biosynthesis	chr3:1812137-1839736	13.9159	0.896518	-3.95626	1.20449e-07	6.51514e-06	DOWN
107412857	LOC107412857	uncharacterized LOC107412857	GO:0005623|GO:0050896|GO:0008152|GO:0006950|GO:0051716|GO:0005622|GO:0044237|GO:0009607|GO:0009058|GO:0006807|GO:0051707|GO:0044238|GO:0006955|GO:0005515|GO:0043231|GO:0006952|GO:0006139|GO:0006725|GO:0005737|GO:0051090|GO:0009617|GO:0045087|GO:0009314|GO:0051091|GO:0009814|GO:0019438|GO:0010467|GO:0005634|GO:0009416|GO:0010468|GO:0010628|GO:0051252|GO:0009536|GO:0016070|GO:0042742|GO:0071482|GO:…	cell|response to stimulus|metabolic process|response to stress|cellular response to stimulus|intracellular|cellular metabolic process|response to biotic stimulus|biosynthetic process|nitrogen compound metabolic process|response to other organism|primary metabolic process|immune response|protein binding|intracellular membrane-bounded organelle|defense response|nucleobase-containing compound metabo…	-	-	-	-	chr3:1900661-1901119	0.732341	18.7974	4.68187	0.000300061	0.00510245	UP
107412866	LOC107412866	mitochondrial metalloendopeptidase OMA1-like	GO:0016020|GO:0005623|GO:0008152|GO:0003824|GO:0016787|GO:0005622|GO:0044238|GO:0008233|GO:0043231|GO:0019538|GO:0005737|GO:0006508|GO:0005739|GO:0004175|GO:0008237|GO:0004222	membrane|cell|metabolic process|catalytic activity|hydrolase activity|intracellular|primary metabolic process|peptidase activity|intracellular membrane-bounded organelle|protein metabolic process|cytoplasm|proteolysis|mitochondrion|endopeptidase activity|metallopeptidase activity|metalloendopeptidase activity	-	-	-	-	chr3:1944581-1945738	0.0977677	10.6149	6.76251	3.75173e-14	8.82844e-12	UP
107412913	LOC107412913	UDP-glucose flavonoid 3-O-glucosyltransferase 7-like	-	-	-	-	-	-	chr3:2317643-2319174	0.188311	3.27119	4.11863	4.88766e-06	0.000163112	UP
107412920	LOC107412920	exonuclease 1	GO:0005623|GO:0050896|GO:0008152|GO:0003824|GO:0016787|GO:0006950|GO:0051716|GO:0005622|GO:0044237|GO:0006807|GO:0044238|GO:0043231|GO:0043169|GO:0003676|GO:0006139|GO:0006725|GO:0016788|GO:0006281|GO:0006974|GO:0005634|GO:0003677|GO:0004518|GO:0046872|GO:0006259|GO:0004519|GO:0004527	cell|response to stimulus|metabolic process|catalytic activity|hydrolase activity|response to stress|cellular response to stimulus|intracellular|cellular metabolic process|nitrogen compound metabolic process|primary metabolic process|intracellular membrane-bounded organelle|cation binding|nucleic acid binding|nucleobase-containing compound metabolic process|cellular aromatic compound metabolic pr…	-	-	ko03430	Mismatch repair	chr1:5906399-5912746	3.43876	0.858144	-2.0026	0.000872191	0.0119826	DOWN
107412925	LOC107412925	putative calcium-transporting ATPase 13, plasma membrane-type	GO:0051179|GO:0016020|GO:0005623|GO:0005215|GO:0003824|GO:0016787|GO:0031224|GO:0005622|GO:0071944|GO:0022857|GO:0005886|GO:0005515|GO:0043231|GO:0016021|GO:0006810|GO:0022891|GO:0005887|GO:0055085|GO:0016817|GO:0031226|GO:0005516|GO:0006811|GO:0015075|GO:0016818|GO:0034220|GO:0016820|GO:0015399|GO:0042626|GO:0006812|GO:0016462|GO:0008324|GO:0098655|GO:0015662|GO:0017111|GO:0019829|GO:0016887|GO:…	localization|membrane|cell|transporter activity|catalytic activity|hydrolase activity|intrinsic component of membrane|intracellular|cell periphery|transmembrane transporter activity|plasma membrane|protein binding|intracellular membrane-bounded organelle|integral component of membrane|transport|substrate-specific transmembrane transporter activity|integral component of plasma membrane|transmembra…	-	-	-	-	chr3:2654022-2661994	0.119514	5.64944	5.56285	2.00055e-08	1.33364e-06	UP
107413012	LOC107413012	ankyrin repeat-containing protein At3g12360-like	-	-	-	-	-	-	chr3:3909824-3912100	0.479805	5.79194	3.59353	0.000192656	0.00354559	UP
107413054	LOC107413054	beta-D-glucosyl crocetin beta-1,6-glucosyltransferase-like	GO:0008152|GO:0003824|GO:0016740|GO:0016757|GO:0016758	metabolic process|catalytic activity|transferase activity|transferase activity, transferring glycosyl groups|transferase activity, transferring hexosyl groups	-	-	-	-	chr3:3931070-3932431	8.96016	0.405894	-4.46435	2.26039e-06	8.43267e-05	DOWN
107413057	LOC107413057	beta-D-glucosyl crocetin beta-1,6-glucosyltransferase-like	GO:0008152|GO:0003824|GO:0016740|GO:0016757|GO:0016758	metabolic process|catalytic activity|transferase activity|transferase activity, transferring glycosyl groups|transferase activity, transferring hexosyl groups	-	-	-	-	chr3:3935873-3937225	7.39931	0.325616	-4.50615	1.49406e-07	7.83515e-06	DOWN
107413083	LOC107413083	cytochrome P450 714B3-like	GO:0016020|GO:0005623|GO:0008152|GO:0042175|GO:0031090|GO:0019825|GO:0031224|GO:0005622|GO:0005789|GO:0012505|GO:0098588|GO:0043231|GO:0016021|GO:0005737|GO:0055114|GO:0005783	membrane|cell|metabolic process|nuclear outer membrane-endoplasmic reticulum membrane network|organelle membrane|oxygen binding|intrinsic component of membrane|intracellular|endoplasmic reticulum membrane|endomembrane system|bounding membrane of organelle|intracellular membrane-bounded organelle|integral component of membrane|cytoplasm|oxidation-reduction process|endoplasmic reticulum	-	-	-	-	chr3:4001855-4005089	26.0866	3.12346	-3.06209	5.80857e-06	0.000188587	DOWN
107413084	LOC107413084	UDP-glycosyltransferase 79B9-like	GO:0005623|GO:0008152|GO:0003824|GO:0016740|GO:0005622|GO:0043231|GO:0016757|GO:0005737|GO:0009536|GO:0016758|GO:0009507	cell|metabolic process|catalytic activity|transferase activity|intracellular|intracellular membrane-bounded organelle|transferase activity, transferring glycosyl groups|cytoplasm|plastid|transferase activity, transferring hexosyl groups|chloroplast	-	-	-	-	chr3:4015998-4018189	1.81154	0.100584	-4.17074	4.58433e-07	2.09313e-05	DOWN
107413090	LOC107413090	dynamin-related protein 4C-like	GO:0005623|GO:0003824|GO:0016787|GO:0005622|GO:0005737|GO:0016817|GO:0005874|GO:0000166|GO:0016818|GO:0017076|GO:0005856|GO:0005525|GO:0015630|GO:0016462|GO:0017111|GO:0003924	cell|catalytic activity|hydrolase activity|intracellular|cytoplasm|hydrolase activity, acting on acid anhydrides|microtubule|nucleotide binding|hydrolase activity, acting on acid anhydrides, in phosphorus-containing anhydrides|purine nucleotide binding|cytoskeleton|GTP binding|microtubule cytoskeleton|pyrophosphatase activity|nucleoside-triphosphatase activity|GTPase activity	-	-	-	-	chr1:6137142-6139556	15.9414	74.6928	2.22819	1.80793e-09	1.58373e-07	UP
107413125	LOC107413125	2-methyl-6-phytyl-1,4-hydroquinone methyltransferase, chloroplastic-like	GO:0016020|GO:0005623|GO:0008152|GO:0003824|GO:0031090|GO:0016740|GO:0031224|GO:0005622|GO:0044237|GO:0009058|GO:0043231|GO:0016021|GO:0044281|GO:0005737|GO:0019866|GO:0042170|GO:0008168|GO:0031969|GO:0009526|GO:0010189|GO:0042362|GO:0009528|GO:0009536|GO:0006766|GO:0009706|GO:0008757|GO:0009507|GO:0009941|GO:0051741|GO:0010236	membrane|cell|metabolic process|catalytic activity|organelle membrane|transferase activity|intrinsic component of membrane|intracellular|cellular metabolic process|biosynthetic process|intracellular membrane-bounded organelle|integral component of membrane|small molecule metabolic process|cytoplasm|organelle inner membrane|plastid membrane|methyltransferase activity|chloroplast membrane|plastid e…	-	-	ko01100|ko01110|ko00130	Metabolic pathways|Biosynthesis of secondary metabolites|Ubiquinone and other terpenoid-quinone biosynthesis	chr3:4415108-4417412	10.8645	1.80337	-2.59085	5.17926e-06	0.000171595	DOWN
107413132	LOC107413132	auxin-responsive protein IAA14-like	GO:0032502|GO:0005623|GO:0023052|GO:0050896|GO:0008152|GO:0003700|GO:0051716|GO:0009653|GO:0005622|GO:0009892|GO:0044237|GO:0009058|GO:0006807|GO:0044238|GO:0005515|GO:0009725|GO:0009791|GO:0007165|GO:0043231|GO:0007275|GO:0048569|GO:0006139|GO:0006725|GO:0070887|GO:0010015|GO:0046983|GO:0009886|GO:0048364|GO:0048513|GO:0007154|GO:0019438|GO:0010467|GO:0005634|GO:0009733|GO:0010468|GO:0009755|GO:…	developmental process|cell|signaling|response to stimulus|metabolic process|transcription factor activity, sequence-specific DNA binding|cellular response to stimulus|anatomical structure morphogenesis|intracellular|negative regulation of metabolic process|cellular metabolic process|biosynthetic process|nitrogen compound metabolic process|primary metabolic process|protein binding|response to horm…	-	-	ko04075	Plant hormone signal transduction	chr3:4593893-4595871	72.6789	1.01588	-6.16073	4.35899e-16	1.42871e-13	DOWN
107413138	LOC107413138	protein SIEVE ELEMENT OCCLUSION B-like	GO:0032502|GO:0005623|GO:0005622|GO:0005515|GO:0043231|GO:0043621|GO:0042802|GO:0046983|GO:0042803|GO:0005634|GO:0010087|GO:0010088	developmental process|cell|intracellular|protein binding|intracellular membrane-bounded organelle|protein self-association|identical protein binding|protein dimerization activity|protein homodimerization activity|nucleus|phloem or xylem histogenesis|phloem development	-	-	-	-	chr3:4663292-4667509	0.0219499	1.7846	6.34524	0.000112577	0.00226066	UP
107413145	LOC107413145	uncharacterized LOC107413145	-	-	-	-	-	-	chr3:4405047-4408770	8.20429	1.92691	-2.09009	1.07254e-05	0.000310832	DOWN
107413181	LOC107413181	cytochrome P450 714B2-like	GO:0016020|GO:0005623|GO:0008152|GO:0042175|GO:0031090|GO:0019825|GO:0031224|GO:0005622|GO:0005789|GO:0012505|GO:0098588|GO:0043231|GO:0016021|GO:0005737|GO:0055114|GO:0005783	membrane|cell|metabolic process|nuclear outer membrane-endoplasmic reticulum membrane network|organelle membrane|oxygen binding|intrinsic component of membrane|intracellular|endoplasmic reticulum membrane|endomembrane system|bounding membrane of organelle|intracellular membrane-bounded organelle|integral component of membrane|cytoplasm|oxidation-reduction process|endoplasmic reticulum	-	-	-	-	chr3:5081876-5084949	32.3152	2.6989	-3.58177	1.01488e-09	9.43973e-08	DOWN
107413185	LOC107413185	uncharacterized LOC107413185	-	-	-	-	-	-	chr3:5145095-5152022	149.163	17.4309	-3.09717	2.53316e-05	0.00064817	DOWN
107413190	LOC107413190	glucomannan 4-beta-mannosyltransferase 9-like	GO:0016020|GO:0005623|GO:0050896|GO:0008152|GO:0003824|GO:0031090|GO:0016740|GO:0031224|GO:0005622|GO:0009607|GO:0051707|GO:0012505|GO:0044238|GO:0098588|GO:0043231|GO:0016021|GO:0016757|GO:0005737|GO:0005975|GO:0009617|GO:0005794|GO:0000139|GO:0009294|GO:0016758|GO:0000030|GO:0097502|GO:0047259|GO:0051753	membrane|cell|response to stimulus|metabolic process|catalytic activity|organelle membrane|transferase activity|intrinsic component of membrane|intracellular|response to biotic stimulus|response to other organism|endomembrane system|primary metabolic process|bounding membrane of organelle|intracellular membrane-bounded organelle|integral component of membrane|transferase activity, transferring gl…	-	-	-	-	chr3:5158982-5162163	6.75313	0.650075	-3.37688	0.00104838	0.0139372	DOWN
107413205	LOC107413205	serine/threonine-protein phosphatase PP1 isozyme 2-like	GO:0005623|GO:0008152|GO:0003824|GO:0016787|GO:0008287|GO:0005622|GO:0044237|GO:0044238|GO:0043234|GO:0000164|GO:0019538|GO:0043169|GO:0016788|GO:0005737|GO:0006793|GO:0042578|GO:0044267|GO:0006796|GO:0046872|GO:0016311|GO:0006464|GO:0016791|GO:0006470|GO:0004721|GO:0004722	cell|metabolic process|catalytic activity|hydrolase activity|protein serine/threonine phosphatase complex|intracellular|cellular metabolic process|primary metabolic process|protein complex|protein phosphatase type 1 complex|protein metabolic process|cation binding|hydrolase activity, acting on ester bonds|cytoplasm|phosphorus metabolic process|phosphoric ester hydrolase activity|cellular protein …	-	-	ko03015|ko04113|ko04114|ko04810|ko04931|ko04022|ko04390|ko04024|ko04510|ko04750	mRNA surveillance pathway|Meiosis - yeast|Oocyte meiosis|Regulation of actin cytoskeleton|Insulin resistance|cGMP-PKG signaling pathway|Hippo signaling pathway|cAMP signaling pathway|Focal adhesion|Inflammatory mediator regulation of TRP channels	chr3:5250761-5254364	2.82311	0.374683	-2.91354	0.000537175	0.00822096	DOWN
107413219	LOC107413219	protein NRT1/ PTR FAMILY 6.3	GO:0051179|GO:0016020|GO:0005623|GO:0005215|GO:0050896|GO:0031224|GO:0006950|GO:0071944|GO:0022857|GO:0005886|GO:0005515|GO:0016021|GO:0006810|GO:0022891|GO:0055085|GO:0009415|GO:0009414|GO:0006811|GO:0015075|GO:0034220|GO:0010167|GO:0015293|GO:0008509|GO:0098656|GO:0015706|GO:0006820|GO:0015103|GO:0015112	localization|membrane|cell|transporter activity|response to stimulus|intrinsic component of membrane|response to stress|cell periphery|transmembrane transporter activity|plasma membrane|protein binding|integral component of membrane|transport|substrate-specific transmembrane transporter activity|transmembrane transport|response to water|response to water deprivation|ion transport|ion transmembran…	-	-	-	-	chr3:5572326-5576524	37.5967	7.91213	-2.24847	3.43813e-08	2.15624e-06	DOWN
107413233	LOC107413233	uncharacterized LOC107413233	-	-	-	-	-	-	chr3:5997328-5999038	3.45647	19.3689	2.48637	2.75883e-05	0.000692398	UP
107413234	LOC107413234	protein SRG1-like	GO:0032502|GO:0005623|GO:0008152|GO:0003824|GO:0016491|GO:0005622|GO:0007275|GO:0043169|GO:0051213|GO:0007568|GO:0005737|GO:0055114|GO:0048513|GO:0016705|GO:0016706|GO:0010260|GO:0046872|GO:0016682	developmental process|cell|metabolic process|catalytic activity|oxidoreductase activity|intracellular|multicellular organism development|cation binding|dioxygenase activity|aging|cytoplasm|oxidation-reduction process|animal organ development|oxidoreductase activity, acting on paired donors, with incorporation or reduction of molecular oxygen|oxidoreductase activity, acting on paired donors, with …	-	-	-	-	chr1:5854767-5856874	3.38788	17.9168	2.40286	1.9408e-05	0.00051677	UP
107413261	LOC107413261	alpha,alpha-trehalose-phosphate synthase [UDP-forming] 1-like	GO:0032502|GO:0005576|GO:0005623|GO:0000003|GO:0023052|GO:0050896|GO:0008152|GO:0003824|GO:0003006|GO:0016740|GO:0071554|GO:0051716|GO:0005622|GO:0044237|GO:0071944|GO:0009058|GO:0044238|GO:0042546|GO:0005618|GO:0009791|GO:0007165|GO:0043231|GO:0007275|GO:0016757|GO:0044262|GO:0005737|GO:0071669|GO:0070887|GO:0005975|GO:0048316|GO:0009793|GO:0007154|GO:0051301|GO:0016051|GO:0010154|GO:0009832|GO:…	developmental process|extracellular region|cell|reproduction|signaling|response to stimulus|metabolic process|catalytic activity|developmental process involved in reproduction|transferase activity|cell wall organization or biogenesis|cellular response to stimulus|intracellular|cellular metabolic process|cell periphery|biosynthetic process|primary metabolic process|cell wall biogenesis|cell wall|p…	-	-	ko01100|ko00500	Metabolic pathways|Starch and sucrose metabolism	chr1:5977932-5992357	0.118004	1.20966	3.3577	0.00116711	0.0151	UP
107413287	LOC107413287	putative inactive disease susceptibility protein LOV1	GO:0050896|GO:0006950|GO:0006952|GO:0000166|GO:0017076|GO:0043531|GO:0005524|GO:0030554	response to stimulus|response to stress|defense response|nucleotide binding|purine nucleotide binding|ADP binding|ATP binding|adenyl nucleotide binding	-	-	-	-	chr3:6767941-6770508	1.9157	0.0588642	-5.02434	0.000198737	0.00363805	DOWN
107413290	LOC107413290	probable disease resistance protein RXW24L	GO:0005623|GO:0050896|GO:0006950|GO:0005622|GO:0043231|GO:0006952|GO:0000166|GO:0017076|GO:0005634|GO:0043531|GO:0005524|GO:0030554	cell|response to stimulus|response to stress|intracellular|intracellular membrane-bounded organelle|defense response|nucleotide binding|purine nucleotide binding|nucleus|ADP binding|ATP binding|adenyl nucleotide binding	-	-	-	-	chr3:6814438-6817167	0.836207	0.0229218	-5.18907	0.000137255	0.00267249	DOWN
107413305	LOC107413305	putative disease resistance protein At1g59780	GO:0050896|GO:0006950|GO:0006952|GO:0000166|GO:0017076|GO:0043531|GO:0005524|GO:0030554	response to stimulus|response to stress|defense response|nucleotide binding|purine nucleotide binding|ADP binding|ATP binding|adenyl nucleotide binding	-	-	-	-	chr3:6831384-6833699	3.97354	0.715907	-2.47258	0.00275152	0.0297488	DOWN
107413335	LOC107413335	LRR receptor-like serine/threonine-protein kinase FLS2	GO:0051179|GO:0016020|GO:0005623|GO:0023052|GO:0004871|GO:0050896|GO:0008152|GO:0003824|GO:0051641|GO:0016740|GO:0006950|GO:0071554|GO:0051716|GO:0005622|GO:0044237|GO:0004872|GO:0071944|GO:0009607|GO:0051707|GO:0038023|GO:0012505|GO:0044238|GO:0005886|GO:0005515|GO:0004888|GO:0005768|GO:0007165|GO:0043231|GO:0019538|GO:0006952|GO:0006810|GO:0005737|GO:0052544|GO:0006793|GO:0055085|GO:0009617|GO:…	localization|membrane|cell|signaling|signal transducer activity|response to stimulus|metabolic process|catalytic activity|cellular localization|transferase activity|response to stress|cell wall organization or biogenesis|cellular response to stimulus|intracellular|cellular metabolic process|receptor activity|cell periphery|response to biotic stimulus|response to other organism|signaling receptor …	-	-	ko04626	Plant-pathogen interaction	chr1:6251014-6252890	50.9415	6.40964	-2.99052	8.252e-12	1.22147e-09	DOWN
107413354	LOC107413354	uncharacterized LOC107413354	GO:0005623|GO:0000989|GO:0005622|GO:0043233|GO:0043234|GO:0003712|GO:0043231|GO:0031248|GO:0005634|GO:0000123|GO:0031981|GO:1990234|GO:0005654|GO:0070461|GO:0000124	cell|transcription factor activity, transcription factor binding|intracellular|organelle lumen|protein complex|transcription cofactor activity|intracellular membrane-bounded organelle|protein acetyltransferase complex|nucleus|histone acetyltransferase complex|nuclear lumen|transferase complex|nucleoplasm|SAGA-type complex|SAGA complex	-	-	-	-	chr3:7098585-7106545	0.386096	6.45827	4.06411	1.04999e-08	7.66796e-07	UP
107413361	LOC107413361	disease resistance RPP8-like protein 3	GO:0016020|GO:0005623|GO:0050896|GO:0006950|GO:0051716|GO:0071944|GO:0009607|GO:0051707|GO:0006955|GO:0005886|GO:0009615|GO:0008219|GO:0051607|GO:0006952|GO:0070887|GO:0045087|GO:0009314|GO:0050688|GO:0000166|GO:0050691|GO:0017076|GO:0009626|GO:0031347|GO:0009416|GO:0043531|GO:0009751|GO:0012501|GO:0002230|GO:0005524|GO:0030554|GO:0071407|GO:0071446	membrane|cell|response to stimulus|response to stress|cellular response to stimulus|cell periphery|response to biotic stimulus|response to other organism|immune response|plasma membrane|response to virus|cell death|defense response to virus|defense response|cellular response to chemical stimulus|innate immune response|response to radiation|regulation of defense response to virus|nucleotide bindin…	-	-	-	-	chr3:7440510-7443962	5.68741	1.28811	-2.14251	0.000405154	0.00652704	DOWN
107413388	LOC107413388	disease resistance protein RPP8-like	GO:0016020|GO:0005623|GO:0050896|GO:0006950|GO:0051716|GO:0071944|GO:0009607|GO:0051707|GO:0006955|GO:0005886|GO:0009615|GO:0008219|GO:0051607|GO:0006952|GO:0070887|GO:0045087|GO:0009314|GO:0050688|GO:0000166|GO:0050691|GO:0017076|GO:0009626|GO:0031347|GO:0009416|GO:0043531|GO:0009751|GO:0012501|GO:0002230|GO:0005524|GO:0030554|GO:0071407|GO:0071446	membrane|cell|response to stimulus|response to stress|cellular response to stimulus|cell periphery|response to biotic stimulus|response to other organism|immune response|plasma membrane|response to virus|cell death|defense response to virus|defense response|cellular response to chemical stimulus|innate immune response|response to radiation|regulation of defense response to virus|nucleotide bindin…	-	-	-	-	chr3:7659149-7663087	12.4847	1.81654	-2.7809	1.61949e-07	8.38119e-06	DOWN
107413389	LOC107413389	uncharacterized LOC107413389	GO:0016020|GO:0005623|GO:0008152|GO:0003824|GO:0016787|GO:0005622|GO:0044237|GO:0071944|GO:0009058|GO:0044238|GO:0005886|GO:0043231|GO:0043169|GO:0044262|GO:0016798|GO:0005737|GO:0005975|GO:0016051|GO:0016052|GO:0009532|GO:0009536|GO:0005976|GO:0004553|GO:0010303|GO:0006073|GO:0000271|GO:0009250|GO:0009570|GO:0051060|GO:0000272|GO:0009507|GO:0005982|GO:0004556|GO:0009251|GO:0019252|GO:0005983	membrane|cell|metabolic process|catalytic activity|hydrolase activity|intracellular|cellular metabolic process|cell periphery|biosynthetic process|primary metabolic process|plasma membrane|intracellular membrane-bounded organelle|cation binding|cellular carbohydrate metabolic process|hydrolase activity, acting on glycosyl bonds|cytoplasm|carbohydrate metabolic process|carbohydrate biosynthetic pr…	-	-	-	-	chr3:7620594-7622701	11.4958	2.33864	-2.29736	0.00466974	0.0443488	DOWN
107413391	LOC107413391	uncharacterized LOC107413391	-	-	-	-	-	-	chr3:7619350-7620390	9.91506	2.43997	-2.02276	0.00474893	0.0448544	DOWN
107413392	LOC107413392	uncharacterized LOC107413392	-	-	-	-	-	-	chr3:7652324-7653685	5.23116	0.118516	-5.46398	2.38112e-05	0.000615559	DOWN
107413394	LOC107413394	uncharacterized LOC107413394	-	-	-	-	-	-	chr3:7656188-7658502	3.43715	0.112346	-4.9352	0.0003207	0.00535447	DOWN
107413395	LOC107413395	disease resistance protein RPH8A-like	GO:0016020|GO:0005623|GO:0050896|GO:0006950|GO:0051716|GO:0071944|GO:0009607|GO:0051707|GO:0006955|GO:0005886|GO:0009615|GO:0008219|GO:0051607|GO:0006952|GO:0070887|GO:0045087|GO:0009314|GO:0050688|GO:0000166|GO:0050691|GO:0017076|GO:0009626|GO:0031347|GO:0009416|GO:0043531|GO:0009751|GO:0012501|GO:0002230|GO:0005524|GO:0030554|GO:0071407|GO:0071446	membrane|cell|response to stimulus|response to stress|cellular response to stimulus|cell periphery|response to biotic stimulus|response to other organism|immune response|plasma membrane|response to virus|cell death|defense response to virus|defense response|cellular response to chemical stimulus|innate immune response|response to radiation|regulation of defense response to virus|nucleotide bindin…	-	-	-	-	chr3:7602959-7605365	12.5639	1.53155	-3.03622	2.07583e-07	1.04291e-05	DOWN
107413423	LOC107413423	ribulose bisphosphate carboxylase/oxygenase activase, chloroplastic	GO:0032502|GO:0005576|GO:0016020|GO:0005623|GO:0050896|GO:0006950|GO:0030234|GO:0005622|GO:0071944|GO:0009607|GO:0051707|GO:0048046|GO:0009725|GO:0005618|GO:0042651|GO:0043231|GO:0009266|GO:0007275|GO:0006952|GO:0009409|GO:0009579|GO:0007568|GO:0005737|GO:0009617|GO:0009314|GO:0048513|GO:0008047|GO:0048367|GO:0000166|GO:0017076|GO:0005634|GO:0009753|GO:0009526|GO:0009532|GO:0048827|GO:0010260|GO:…	developmental process|extracellular region|membrane|cell|response to stimulus|response to stress|enzyme regulator activity|intracellular|cell periphery|response to biotic stimulus|response to other organism|apoplast|response to hormone|cell wall|thylakoid membrane|intracellular membrane-bounded organelle|response to temperature stimulus|multicellular organism development|defense response|response…	-	-	-	-	chr3:7848898-7852233	7.78571	1.63111	-2.25497	0.00137742	0.0172299	DOWN
107413435	LOC107413435	DNA replication licensing factor MCM3	GO:0005623|GO:0008152|GO:0003824|GO:0016787|GO:0005622|GO:0044237|GO:0009058|GO:0006807|GO:0044238|GO:0043234|GO:0005515|GO:0043231|GO:0003676|GO:0006139|GO:0006725|GO:0016817|GO:0000347|GO:0000166|GO:0016818|GO:0017076|GO:0005634|GO:0003677|GO:0051276|GO:0006259|GO:0005524|GO:0006260|GO:0016462|GO:0030554|GO:0006270|GO:0006261|GO:0017111|GO:0016887|GO:0006268|GO:0032508|GO:0042623|GO:0008094	cell|metabolic process|catalytic activity|hydrolase activity|intracellular|cellular metabolic process|biosynthetic process|nitrogen compound metabolic process|primary metabolic process|protein complex|protein binding|intracellular membrane-bounded organelle|nucleic acid binding|nucleobase-containing compound metabolic process|cellular aromatic compound metabolic process|hydrolase activity, acting…	-	-	ko04110|ko04111|ko04113|ko03030	Cell cycle|Cell cycle - yeast|Meiosis - yeast|DNA replication	chr1:6334435-6340180	9.72882	2.23738	-2.12045	9.31757e-06	0.000277631	DOWN
107413443	LOC107413443	zeatin O-xylosyltransferase-like	GO:0005623|GO:0008152|GO:0003824|GO:0016740|GO:0005622|GO:0044237|GO:0009058|GO:0044238|GO:0043231|GO:0044281|GO:0009812|GO:0016757|GO:0005975|GO:0005996|GO:0008194|GO:0009813|GO:0052696|GO:0016758|GO:0046527|GO:0035251|GO:0019752|GO:0080044|GO:0080043	cell|metabolic process|catalytic activity|transferase activity|intracellular|cellular metabolic process|biosynthetic process|primary metabolic process|intracellular membrane-bounded organelle|small molecule metabolic process|flavonoid metabolic process|transferase activity, transferring glycosyl groups|carbohydrate metabolic process|monosaccharide metabolic process|UDP-glycosyltransferase activit…	-	-	-	-	chr3:7967300-7968947	0.0354289	1.53947	5.44136	4.26887e-05	0.00100539	UP
107413451	LOC107413451	16 kDa phloem protein 2	-	-	-	-	-	-	chr3:8118410-8120728	172.236	9.17614	-4.23035	6.39188e-16	1.99979e-13	DOWN
107413464	LOC107413464	cucumisin-like	-	-	-	-	-	-	chr3:8255543-8259756	0.0256533	1.20603	5.55497	0.00106243	0.0140744	UP
107413478	LOC107413478	uncharacterized LOC107413478	-	-	-	-	-	-	chr3:8614532-8616239	0.249955	6.24691	4.64341	7.37945e-05	0.001596	UP
107413493	LOC107413493	CASP-like protein 4D1	GO:0050896|GO:0006950|GO:0009607|GO:0051707|GO:0009725|GO:0002239|GO:0006970|GO:0009266|GO:0006952|GO:0009409|GO:0009611|GO:0009617|GO:0002229|GO:0009723|GO:0009737|GO:0009753|GO:0009751|GO:0009651|GO:0042742	response to stimulus|response to stress|response to biotic stimulus|response to other organism|response to hormone|response to oomycetes|response to osmotic stress|response to temperature stimulus|defense response|response to cold|response to wounding|response to bacterium|defense response to oomycetes|response to ethylene|response to abscisic acid|response to jasmonic acid|response to salicylic …	-	-	-	-	chr3:9072595-9074299	18.7964	1.63069	-3.5269	6.93389e-06	0.000219682	DOWN
107413505	LOC107413505	receptor-like protein kinase THESEUS 1	GO:0032502|GO:0005576|GO:0016020|GO:0005623|GO:0030054|GO:0040007|GO:0023052|GO:0050896|GO:0008152|GO:0003824|GO:0016740|GO:0031224|GO:0051716|GO:0009653|GO:0044237|GO:0009506|GO:0071944|GO:0040008|GO:0005911|GO:0050793|GO:0016049|GO:0044238|GO:0048589|GO:0005886|GO:0009725|GO:0060560|GO:0009791|GO:0007165|GO:0016021|GO:0007275|GO:0019538|GO:0009826|GO:0070887|GO:0048638|GO:0006793|GO:0022603|GO:…	developmental process|extracellular region|membrane|cell|cell junction|growth|signaling|response to stimulus|metabolic process|catalytic activity|transferase activity|intrinsic component of membrane|cellular response to stimulus|anatomical structure morphogenesis|cellular metabolic process|plasmodesma|cell periphery|regulation of growth|cell-cell junction|regulation of developmental process|cell …	-	-	-	-	chr3:8696186-8698895	2.17394	0.426255	-2.35052	0.00216956	0.0247134	DOWN
107413516	LOC107413516	RING-H2 finger protein ATL51-like	GO:0016020|GO:0005623|GO:0008152|GO:0031224|GO:0005622|GO:0044237|GO:0044238|GO:0043231|GO:0016021|GO:0019538|GO:0043169|GO:0005634|GO:0044267|GO:0046872|GO:0006464|GO:0046914|GO:0070647|GO:0008270|GO:0016567	membrane|cell|metabolic process|intrinsic component of membrane|intracellular|cellular metabolic process|primary metabolic process|intracellular membrane-bounded organelle|integral component of membrane|protein metabolic process|cation binding|nucleus|cellular protein metabolic process|metal ion binding|cellular protein modification process|transition metal ion binding|protein modification by sma…	-	-	-	-	chr3:9009271-9009869	0.549286	5.945	3.43605	0.00363053	0.0368412	UP
107413548	LOC107413548	nucleoporin-like protein 2	-	-	-	-	-	-	chr3:9117144-9119159	0.190892	1.26942	2.73334	0.00203536	0.023427	UP
107413557	LOC107413557	dirigent protein 9-like	GO:0005576|GO:0008152|GO:0044237|GO:0009058|GO:0048046|GO:0006725|GO:0019748|GO:0009698|GO:0019438|GO:0009699|GO:0044550|GO:0009807	extracellular region|metabolic process|cellular metabolic process|biosynthetic process|apoplast|cellular aromatic compound metabolic process|secondary metabolic process|phenylpropanoid metabolic process|aromatic compound biosynthetic process|phenylpropanoid biosynthetic process|secondary metabolite biosynthetic process|lignan biosynthetic process	-	-	-	-	chr3:9396179-9396954	19.2706	0.108594	-7.47131	5.95148e-13	1.09971e-10	DOWN
107413563	LOC107413563	dirigent protein 16-like	GO:0005576|GO:0005623|GO:0005622|GO:0048046|GO:0043231|GO:0005737|GO:0009536|GO:0009507	extracellular region|cell|intracellular|apoplast|intracellular membrane-bounded organelle|cytoplasm|plastid|chloroplast	-	-	-	-	chr3:9393744-9394667	2.56101	0.163597	-3.9685	0.00475936	0.0449211	DOWN
107413571	LOC107413571	probable membrane-associated kinase regulator 4	GO:0016020|GO:0005623|GO:0030054|GO:0005622|GO:0009506|GO:0071944|GO:0005911|GO:0005886|GO:0043231|GO:0005634	membrane|cell|cell junction|intracellular|plasmodesma|cell periphery|cell-cell junction|plasma membrane|intracellular membrane-bounded organelle|nucleus	-	-	-	-	chr3:9658753-9659929	3.65227	0.544905	-2.74472	0.00288322	0.0308803	DOWN
107413585	LOC107413585	chalcone--flavonone isomerase	GO:0016020|GO:0005623|GO:0050896|GO:0008152|GO:0003824|GO:0042175|GO:0031090|GO:0016853|GO:0019898|GO:0005622|GO:0005789|GO:0009058|GO:0012505|GO:0005515|GO:0009725|GO:0098588|GO:0043231|GO:0009812|GO:0042406|GO:0080167|GO:0005737|GO:0005783|GO:0009314|GO:0005774|GO:0045430|GO:0005634|GO:0009733|GO:0005773|GO:0009705|GO:0009416|GO:0009813|GO:0009536|GO:0000325|GO:0009411|GO:0009507|GO:0010224	membrane|cell|response to stimulus|metabolic process|catalytic activity|nuclear outer membrane-endoplasmic reticulum membrane network|organelle membrane|isomerase activity|extrinsic component of membrane|intracellular|endoplasmic reticulum membrane|biosynthetic process|endomembrane system|protein binding|response to hormone|bounding membrane of organelle|intracellular membrane-bounded organelle|f…	-	-	ko01100|ko01110|ko00941	Metabolic pathways|Biosynthesis of secondary metabolites|Flavonoid biosynthesis	chr3:9617631-9619871	0.913399	11.2057	3.61685	6.18849e-08	3.63287e-06	UP
107413601	LOC107413601	LOB domain-containing protein 1-like	GO:0005623|GO:0005622|GO:0043231|GO:0005737|GO:0005634|GO:0005739	cell|intracellular|intracellular membrane-bounded organelle|cytoplasm|nucleus|mitochondrion	-	-	-	-	chr3:10189215-10191345	1.45768	7.45672	2.35486	0.000574167	0.0086714	UP
107413622	LOC107413622	two-component response regulator-like PRR37	GO:0048511|GO:0005623|GO:0023052|GO:0004871|GO:0050896|GO:0008152|GO:0051716|GO:0005622|GO:0009892|GO:0044237|GO:0009058|GO:0006807|GO:0007623|GO:0044238|GO:0007165|GO:0043231|GO:0009266|GO:0003676|GO:0006139|GO:0006725|GO:0005737|GO:0000156|GO:0009314|GO:0007154|GO:0019438|GO:0010467|GO:0010017|GO:0005634|GO:0003677|GO:0009416|GO:0010468|GO:0051252|GO:0035556|GO:0010629|GO:0005739|GO:0016070|GO:…	rhythmic process|cell|signaling|signal transducer activity|response to stimulus|metabolic process|cellular response to stimulus|intracellular|negative regulation of metabolic process|cellular metabolic process|biosynthetic process|nitrogen compound metabolic process|circadian rhythm|primary metabolic process|signal transduction|intracellular membrane-bounded organelle|response to temperature stim…	-	-	ko04712	Circadian rhythm - plant	chr3:10297354-10321377	0.994987	5.83174	2.55118	1.19735e-07	6.48926e-06	UP
107413640	LOC107413640	uncharacterized LOC107413640	-	-	-	-	-	-	chr1:6247991-6249773	6.72233	0.882785	-2.92883	9.69033e-05	0.00200296	DOWN
107413674	LOC107413674	probable RNA-binding protein ARP1	GO:0032502|GO:0005623|GO:0050896|GO:0006950|GO:0005622|GO:0050793|GO:0009725|GO:2000026|GO:0009791|GO:0043231|GO:0006970|GO:0007275|GO:0003676|GO:0005737|GO:0009845|GO:0009415|GO:0009414|GO:0000166|GO:0009737|GO:0010029|GO:0005634|GO:0003723|GO:0090351|GO:0009651|GO:0009536|GO:1900140|GO:0009507	developmental process|cell|response to stimulus|response to stress|intracellular|regulation of developmental process|response to hormone|regulation of multicellular organismal development|post-embryonic development|intracellular membrane-bounded organelle|response to osmotic stress|multicellular organism development|nucleic acid binding|cytoplasm|seed germination|response to water|response to wat…	-	-	-	-	chr3:11192525-11209133	7.50201	1.46638	-2.35502	0.00241615	0.026899	DOWN
107413678	LOC107413678	LOB domain-containing protein 1-like	GO:0005623|GO:0005622|GO:0043231|GO:0005737|GO:0005634|GO:0005739	cell|intracellular|intracellular membrane-bounded organelle|cytoplasm|nucleus|mitochondrion	-	-	-	-	chr3:11237872-11239928	0.0956208	1.92935	4.33465	0.000352817	0.00581314	UP
107413706	LOC107413706	uncharacterized protein ycf23-like	-	-	-	-	-	-	chr1:6320239-6322978	0.253222	3.60638	3.83208	2.30854e-05	0.000599045	UP
107413709	LOC107413709	cucumisin-like	GO:0005576|GO:0005623|GO:0008152|GO:0003824|GO:0016787|GO:0071944|GO:0044238|GO:0005618|GO:0008233|GO:0019538|GO:0006508|GO:0008236|GO:0004175|GO:0004252	extracellular region|cell|metabolic process|catalytic activity|hydrolase activity|cell periphery|primary metabolic process|cell wall|peptidase activity|protein metabolic process|proteolysis|serine-type peptidase activity|endopeptidase activity|serine-type endopeptidase activity	-	-	-	-	chr3:12303562-12310318	35.9413	3.45972	-3.37692	3.98602e-12	6.13091e-10	DOWN
107413728	LOC107413728	potassium channel KAT1	GO:0051179|GO:0016020|GO:0005623|GO:0005215|GO:0005622|GO:0004872|GO:0071944|GO:0022857|GO:0005886|GO:0005515|GO:0043231|GO:0006810|GO:0022891|GO:0055085|GO:0000166|GO:0006811|GO:0015075|GO:0030551|GO:0005634|GO:0034220|GO:0015267|GO:0034765|GO:0006812|GO:0008324|GO:0015276|GO:0005216|GO:0005242|GO:0030001|GO:0015672|GO:0005261|GO:0005244|GO:0006813|GO:0005267|GO:0046873|GO:0005249|GO:0015079	localization|membrane|cell|transporter activity|intracellular|receptor activity|cell periphery|transmembrane transporter activity|plasma membrane|protein binding|intracellular membrane-bounded organelle|transport|substrate-specific transmembrane transporter activity|transmembrane transport|nucleotide binding|ion transport|ion transmembrane transporter activity|cyclic nucleotide binding|nucleus|io…	-	-	-	-	chr1:6398781-6402653	2.53515	0.457437	-2.47042	0.000581292	0.0087556	DOWN
107413732	LOC107413732	putative lipid-transfer protein DIR1	GO:0051179|GO:0005576|GO:0008289|GO:0006810|GO:0071702|GO:0006869	localization|extracellular region|lipid binding|transport|organic substance transport|lipid transport	-	-	-	-	chr3:12901389-12902061	35.1126	4.67846	-2.90788	7.64225e-05	0.00163996	DOWN
107413744	LOC107413744	gibberellin 2-beta-dioxygenase-like	GO:0005623|GO:0050896|GO:0008152|GO:0003824|GO:0016491|GO:0005622|GO:0044237|GO:0009058|GO:0044238|GO:0044281|GO:0043169|GO:0051213|GO:0005737|GO:0055114|GO:0044255|GO:0006629|GO:0009314|GO:0016705|GO:0006720|GO:0016706|GO:0016042|GO:0009416|GO:0046872|GO:0008610|GO:0008299|GO:0045543|GO:0016114|GO:0019752|GO:0009639|GO:0046914|GO:0052634|GO:0045487|GO:0005506|GO:0016102|GO:0009686|GO:0010114|GO:…	cell|response to stimulus|metabolic process|catalytic activity|oxidoreductase activity|intracellular|cellular metabolic process|biosynthetic process|primary metabolic process|small molecule metabolic process|cation binding|dioxygenase activity|cytoplasm|oxidation-reduction process|cellular lipid metabolic process|lipid metabolic process|response to radiation|oxidoreductase activity, acting on pai…	-	-	ko00904	Diterpenoid biosynthesis	chr1:6432314-6433412	2.10173	41.4313	4.30107	1.13513e-16	3.90655e-14	UP
107413786	LOC107413786	short-chain dehydrogenase reductase 3b-like	GO:0008152|GO:0003824|GO:0016491|GO:0044237|GO:0009058|GO:0044238|GO:0016614|GO:0044281|GO:0044255|GO:0006629|GO:0000166|GO:0006720|GO:0016616|GO:0006066|GO:0008610|GO:0008299|GO:0018459|GO:0016114|GO:0018458|GO:0016099|GO:0031525	metabolic process|catalytic activity|oxidoreductase activity|cellular metabolic process|biosynthetic process|primary metabolic process|oxidoreductase activity, acting on CH-OH group of donors|small molecule metabolic process|cellular lipid metabolic process|lipid metabolic process|nucleotide binding|isoprenoid metabolic process|oxidoreductase activity, acting on the CH-OH group of donors, NAD or …	-	-	-	-	chr3:14327922-14328843	5.13308	0.491934	-3.38329	0.00305264	0.0321683	DOWN
107413790	LOC107413790	uncharacterized protein At1g04910-like	GO:0005623|GO:0003824|GO:0016740|GO:0005622|GO:0012505|GO:0043231|GO:0016757|GO:0005737|GO:0005794	cell|catalytic activity|transferase activity|intracellular|endomembrane system|intracellular membrane-bounded organelle|transferase activity, transferring glycosyl groups|cytoplasm|Golgi apparatus	-	-	-	-	chr3:14442805-14447096	0.47166	0.0234897	-4.32765	0.0045563	0.0435117	DOWN
107413798	LOC107413798	7-deoxyloganetic acid glucosyltransferase-like	GO:0008152|GO:0003824|GO:0016740|GO:0044237|GO:0009058|GO:0044238|GO:0016757|GO:1901135|GO:0044255|GO:0006629|GO:0006720|GO:0008194|GO:0008610|GO:0016758|GO:0008299|GO:1900994|GO:0046527|GO:0035251|GO:0016114|GO:0016099	metabolic process|catalytic activity|transferase activity|cellular metabolic process|biosynthetic process|primary metabolic process|transferase activity, transferring glycosyl groups|carbohydrate derivative metabolic process|cellular lipid metabolic process|lipid metabolic process|isoprenoid metabolic process|UDP-glycosyltransferase activity|lipid biosynthetic process|transferase activity, transf…	-	-	-	-	chr3:14855958-14867062	0.411217	4.32691	3.39537	3.09482e-06	0.000111236	UP
107413804	LOC107413804	18.1 kDa class I heat shock protein-like	GO:0005623|GO:0050896|GO:0006950|GO:0005622|GO:0009408|GO:0009266|GO:0005737	cell|response to stimulus|response to stress|intracellular|response to heat|response to temperature stimulus|cytoplasm	-	-	ko04141	Protein processing in endoplasmic reticulum	chr3:14764670-14765770	0.683199	4.08083	2.57848	0.00402218	0.039734	UP
107413810	LOC107413810	uncharacterized acetyltransferase At3g50280	GO:0005623|GO:0050896|GO:0003824|GO:0016740|GO:0005622|GO:0016746|GO:0080167|GO:0005737|GO:0016747	cell|response to stimulus|catalytic activity|transferase activity|intracellular|transferase activity, transferring acyl groups|response to karrikin|cytoplasm|transferase activity, transferring acyl groups other than amino-acyl groups	-	-	-	-	chr3:15230417-15232326	10.2052	2.29731	-2.15128	0.000101063	0.00207337	DOWN
107413815	LOC107413815	17.8 kDa class I heat shock protein-like	GO:0005623|GO:0050896|GO:0006950|GO:0005622|GO:0009408|GO:0009266|GO:0005737	cell|response to stimulus|response to stress|intracellular|response to heat|response to temperature stimulus|cytoplasm	-	-	ko04141	Protein processing in endoplasmic reticulum	chr3:15350982-15351833	7.74008	65.9834	3.09168	6.17366e-13	1.12565e-10	UP
107413842	LOC107413842	putative receptor-like protein kinase At3g47110	GO:0016020|GO:0005623|GO:0023052|GO:0050896|GO:0008152|GO:0003824|GO:0016740|GO:0051716|GO:0044237|GO:0071944|GO:0044238|GO:0005886|GO:0007165|GO:0019538|GO:0006793|GO:0016772|GO:0007154|GO:0000166|GO:0016773|GO:0017076|GO:0016301|GO:0007166|GO:0044267|GO:0006796|GO:0005524|GO:0006464|GO:0016310|GO:0004672|GO:0030554|GO:0006468|GO:0004674|GO:0007169	membrane|cell|signaling|response to stimulus|metabolic process|catalytic activity|transferase activity|cellular response to stimulus|cellular metabolic process|cell periphery|primary metabolic process|plasma membrane|signal transduction|protein metabolic process|phosphorus metabolic process|transferase activity, transferring phosphorus-containing groups|cell communication|nucleotide binding|phosp…	-	-	-	-	chr3:16623406-16627087	2.97823	0.695887	-2.09753	0.0010316	0.013754	DOWN
107413844	LOC107413844	cytochrome P450 90A1	GO:0032502|GO:0016020|GO:0005623|GO:0000003|GO:0040007|GO:0050896|GO:0008152|GO:0003824|GO:0016491|GO:0003006|GO:0019825|GO:0031224|GO:0009653|GO:0005622|GO:0009058|GO:0050793|GO:0016049|GO:0044238|GO:0048589|GO:0060560|GO:2000026|GO:0009791|GO:0009909|GO:0009887|GO:0043231|GO:0016021|GO:0048657|GO:0044281|GO:0007275|GO:0048569|GO:0009826|GO:0046906|GO:0043169|GO:0005737|GO:0048655|GO:0055114|GO:…	developmental process|membrane|cell|reproduction|growth|response to stimulus|metabolic process|catalytic activity|oxidoreductase activity|developmental process involved in reproduction|oxygen binding|intrinsic component of membrane|anatomical structure morphogenesis|intracellular|biosynthetic process|regulation of developmental process|cell growth|primary metabolic process|developmental growth|de…	-	-	ko01110|ko00905	Biosynthesis of secondary metabolites|Brassinosteroid biosynthesis	chr3:16796237-16800295	4.67692	19.3893	2.05163	1.573e-05	0.000432952	UP
107413864	LOC107413864	phospholipase A1-Igamma1, chloroplastic	GO:0032502|GO:0005623|GO:0000003|GO:0008152|GO:0003824|GO:0016787|GO:0003006|GO:0005622|GO:0044238|GO:0010214|GO:0009791|GO:0043231|GO:0007275|GO:0016788|GO:0005737|GO:0048316|GO:0006629|GO:0016298|GO:0010154|GO:0052689|GO:0005739|GO:0008970|GO:0004806|GO:0004620	developmental process|cell|reproduction|metabolic process|catalytic activity|hydrolase activity|developmental process involved in reproduction|intracellular|primary metabolic process|seed coat development|post-embryonic development|intracellular membrane-bounded organelle|multicellular organism development|hydrolase activity, acting on ester bonds|cytoplasm|seed development|lipid metabolic proces…	-	-	-	-	chr1:6633113-6635024	0.701396	3.99367	2.50942	0.00178459	0.0211782	UP
107413888	LOC107413888	putative Myb family transcription factor At1g14600	GO:0005623|GO:0008152|GO:0003700|GO:0005622|GO:0044237|GO:0009058|GO:0006807|GO:0044238|GO:0003682|GO:0043231|GO:0003676|GO:0006139|GO:0006725|GO:0019438|GO:0010467|GO:0005634|GO:0003677|GO:0010468|GO:0051252|GO:0016070|GO:0032774|GO:0006351|GO:2001141|GO:0006355|GO:1903506	cell|metabolic process|transcription factor activity, sequence-specific DNA binding|intracellular|cellular metabolic process|biosynthetic process|nitrogen compound metabolic process|primary metabolic process|chromatin binding|intracellular membrane-bounded organelle|nucleic acid binding|nucleobase-containing compound metabolic process|cellular aromatic compound metabolic process|aromatic compound…	-	-	-	-	chr3:17433413-17435209	2.49816	0.337767	-2.88676	0.00519981	0.0482349	DOWN
107413893	LOC107413893	protein trichome birefringence-like 33	GO:0005623|GO:0003824|GO:0016740|GO:0071554|GO:0005622|GO:0012505|GO:0016746|GO:0043231|GO:0005737|GO:0005794|GO:0016747|GO:0009536|GO:0008374|GO:0016407|GO:0009507|GO:0016413	cell|catalytic activity|transferase activity|cell wall organization or biogenesis|intracellular|endomembrane system|transferase activity, transferring acyl groups|intracellular membrane-bounded organelle|cytoplasm|Golgi apparatus|transferase activity, transferring acyl groups other than amino-acyl groups|plastid|O-acyltransferase activity|acetyltransferase activity|chloroplast|O-acetyltransferase…	-	-	-	-	chr3:17636934-17641522	3.79433	0.447959	-3.08241	0.000274085	0.00474299	DOWN
107413923	LOC107413923	cation/H(+) antiporter 15-like	-	-	-	-	-	-	chr3:17814790-17817670	1.27727	0.0251211	-5.66802	7.75298e-06	0.000240648	DOWN
107413944	LOC107413944	dehydration-responsive element-binding protein 2C-like	GO:0005623|GO:0050896|GO:0008152|GO:0003700|GO:0006950|GO:0005622|GO:0044237|GO:0009058|GO:0006807|GO:0044238|GO:0005515|GO:0009725|GO:0009408|GO:0043231|GO:0009266|GO:0003676|GO:0006139|GO:0006725|GO:0009737|GO:0019438|GO:0010467|GO:0005634|GO:0003677|GO:0010286|GO:0010468|GO:0010628|GO:0051252|GO:0016070|GO:0045893|GO:0032774|GO:0043565|GO:0006351|GO:2001141|GO:0006355|GO:0000975|GO:1903506|GO:…	cell|response to stimulus|metabolic process|transcription factor activity, sequence-specific DNA binding|response to stress|intracellular|cellular metabolic process|biosynthetic process|nitrogen compound metabolic process|primary metabolic process|protein binding|response to hormone|response to heat|intracellular membrane-bounded organelle|response to temperature stimulus|nucleic acid binding|nuc…	-	-	-	-	chr3:17711463-17714545	15.1102	64.8896	2.10246	1.428e-07	7.53177e-06	UP
107413948	LOC107413948	probable leucine-rich repeat receptor-like protein kinase IMK3	GO:0016020|GO:0005623|GO:0030054|GO:0023052|GO:0050896|GO:0008152|GO:0003824|GO:0016740|GO:0031224|GO:0051716|GO:0044237|GO:0009506|GO:0071944|GO:0005911|GO:0044238|GO:0005886|GO:0005618|GO:0007165|GO:0016021|GO:0019538|GO:0006793|GO:0016772|GO:0007154|GO:0000166|GO:0016773|GO:0009505|GO:0017076|GO:0016301|GO:0007166|GO:0044267|GO:0006796|GO:0005524|GO:0006464|GO:0016310|GO:0004672|GO:0030554|GO:…	membrane|cell|cell junction|signaling|response to stimulus|metabolic process|catalytic activity|transferase activity|intrinsic component of membrane|cellular response to stimulus|cellular metabolic process|plasmodesma|cell periphery|cell-cell junction|primary metabolic process|plasma membrane|cell wall|signal transduction|integral component of membrane|protein metabolic process|phosphorus metabol…	-	-	-	-	chr3:17755220-17758949	4.44381	0.872567	-2.34846	4.18312e-05	0.000990281	DOWN
107413998	LOC107413998	mini-chromosome maintenance complex-binding protein	GO:0005623|GO:0050896|GO:0008152|GO:0006950|GO:0051716|GO:0005622|GO:0044237|GO:0009058|GO:0006807|GO:0044238|GO:0043233|GO:0043234|GO:0005515|GO:0043231|GO:0006139|GO:0007049|GO:0006725|GO:0005737|GO:0006281|GO:0042555|GO:0051301|GO:0007059|GO:0005694|GO:0043601|GO:0006974|GO:0000228|GO:0005657|GO:0007067|GO:0000278|GO:0005634|GO:0006301|GO:0009526|GO:0031981|GO:0051276|GO:0007062|GO:0006259|GO:…	cell|response to stimulus|metabolic process|response to stress|cellular response to stimulus|intracellular|cellular metabolic process|biosynthetic process|nitrogen compound metabolic process|primary metabolic process|organelle lumen|protein complex|protein binding|intracellular membrane-bounded organelle|nucleobase-containing compound metabolic process|cell cycle|cellular aromatic compound metabo…	-	-	-	-	chr3:18307146-18312225	9.15569	1.66528	-2.4589	1.71896e-05	0.000465406	DOWN
107414023	LOC107414023	uncharacterized LOC107414023	GO:0005623|GO:0005622|GO:0043231|GO:0005737|GO:0009536|GO:0009507	cell|intracellular|intracellular membrane-bounded organelle|cytoplasm|plastid|chloroplast	-	-	-	-	chr3:18418764-18419549	1.43623	14.0202	3.28714	8.5482e-07	3.60412e-05	UP
107414069	LOC107414069	ATP-dependent DNA helicase SRS2-like protein At4g25120	GO:0005623|GO:0008152|GO:0003824|GO:0016787|GO:0005622|GO:0044237|GO:0006807|GO:0044238|GO:0006139|GO:0006725|GO:0005737|GO:0016817|GO:0000166|GO:0016818|GO:0017076|GO:0051276|GO:0006259|GO:0005524|GO:0006310|GO:0016462|GO:0030554|GO:0017111|GO:0036292|GO:0004386|GO:0003678	cell|metabolic process|catalytic activity|hydrolase activity|intracellular|cellular metabolic process|nitrogen compound metabolic process|primary metabolic process|nucleobase-containing compound metabolic process|cellular aromatic compound metabolic process|cytoplasm|hydrolase activity, acting on acid anhydrides|nucleotide binding|hydrolase activity, acting on acid anhydrides, in phosphorus-conta…	-	-	-	-	chr3:18870208-18886840	3.20433	0.390777	-3.03561	4.71909e-06	0.000159418	DOWN
107414104	LOC107414104	ethylene-responsive transcription factor 2-like	GO:0032502|GO:0005623|GO:0050896|GO:0008152|GO:0003700|GO:0005622|GO:0044237|GO:0009058|GO:0006807|GO:0012505|GO:0044238|GO:0043231|GO:0007275|GO:0003676|GO:0006139|GO:0006725|GO:0051301|GO:0005635|GO:0001944|GO:0019438|GO:0010467|GO:0005634|GO:0003677|GO:0010468|GO:0010628|GO:0010200|GO:0051252|GO:0016070|GO:0005643|GO:0045893|GO:0032774|GO:0006351|GO:2001141|GO:0006355|GO:1903506	developmental process|cell|response to stimulus|metabolic process|transcription factor activity, sequence-specific DNA binding|intracellular|cellular metabolic process|biosynthetic process|nitrogen compound metabolic process|endomembrane system|primary metabolic process|intracellular membrane-bounded organelle|multicellular organism development|nucleic acid binding|nucleobase-containing compound …	-	-	-	-	chr3:19362034-19368994	2.1491	41.8379	4.28301	2.65164e-06	9.72103e-05	UP
107414132	LOC107414132	glutamate dehydrogenase 2	GO:0016020|GO:0005623|GO:0050896|GO:0008152|GO:0003824|GO:0016491|GO:0031090|GO:0006950|GO:0005622|GO:0044237|GO:0006807|GO:0012505|GO:0044238|GO:0098588|GO:0043231|GO:0044281|GO:0006970|GO:0043169|GO:0005737|GO:0055114|GO:0006520|GO:0005774|GO:0005794|GO:0000166|GO:0017076|GO:0005773|GO:0046872|GO:0010038|GO:0005739|GO:0009651|GO:0005524|GO:0046686|GO:0019752|GO:0004352|GO:0030554|GO:0004353|GO:…	membrane|cell|response to stimulus|metabolic process|catalytic activity|oxidoreductase activity|organelle membrane|response to stress|intracellular|cellular metabolic process|nitrogen compound metabolic process|endomembrane system|primary metabolic process|bounding membrane of organelle|intracellular membrane-bounded organelle|small molecule metabolic process|response to osmotic stress|cation bin…	-	-	ko01100|ko01200|ko00250|ko00220|ko00910|ko00471	Metabolic pathways|Carbon metabolism|Alanine, aspartate and glutamate metabolism|Arginine biosynthesis|Nitrogen metabolism|D-Glutamine and D-glutamate metabolism	chr3:19621558-19625907	75.0615	306.44	2.02946	3.16918e-09	2.57386e-07	UP
107414155	LOC107414155	S-type anion channel SLAH1-like	GO:0051179|GO:0016020|GO:0005623|GO:0005215|GO:0031224|GO:0071944|GO:0022857|GO:0005886|GO:0016021|GO:0006810|GO:0019725|GO:0022891|GO:0055085|GO:0006811|GO:0015075|GO:0015267|GO:0006873|GO:0008509|GO:0005216|GO:0005253|GO:0005244|GO:0008308	localization|membrane|cell|transporter activity|intrinsic component of membrane|cell periphery|transmembrane transporter activity|plasma membrane|integral component of membrane|transport|cellular homeostasis|substrate-specific transmembrane transporter activity|transmembrane transport|ion transport|ion transmembrane transporter activity|channel activity|cellular ion homeostasis|anion transmembran…	-	-	-	-	chr3:19907721-19909605	3.78151	36.4682	3.2696	1.26864e-08	9.09591e-07	UP
107414167	LOC107414167	dirigent protein 22-like	GO:0005576|GO:0050896|GO:0008152|GO:0006950|GO:0044237|GO:0009058|GO:0048046|GO:0006952|GO:0006725|GO:0019748|GO:0009698|GO:0019438|GO:0009699|GO:0044550|GO:0009807	extracellular region|response to stimulus|metabolic process|response to stress|cellular metabolic process|biosynthetic process|apoplast|defense response|cellular aromatic compound metabolic process|secondary metabolic process|phenylpropanoid metabolic process|aromatic compound biosynthetic process|phenylpropanoid biosynthetic process|secondary metabolite biosynthetic process|lignan biosynthetic p…	-	-	-	-	chr3:19874206-19875104	0.186922	5.4208	4.858	4.35379e-07	1.99448e-05	UP
107414200	LOC107414200	probable LRR receptor-like serine/threonine-protein kinase At4g08850	GO:0016020|GO:0005623|GO:0030054|GO:0003824|GO:0016740|GO:0031224|GO:0005622|GO:0009506|GO:0071944|GO:0005911|GO:0005886|GO:0043231|GO:0016021|GO:0016772|GO:0005634|GO:0016301	membrane|cell|cell junction|catalytic activity|transferase activity|intrinsic component of membrane|intracellular|plasmodesma|cell periphery|cell-cell junction|plasma membrane|intracellular membrane-bounded organelle|integral component of membrane|transferase activity, transferring phosphorus-containing groups|nucleus|kinase activity	-	-	-	-	chr3:20452266-20455707	0.249002	2.88405	3.53387	2.63089e-05	0.000666364	UP
107414207	LOC107414207	structural maintenance of chromosomes protein 2-1	GO:0005623|GO:0000003|GO:0005215|GO:0005622|GO:0051321|GO:0043234|GO:0043231|GO:0007049|GO:0051301|GO:0007059|GO:0000166|GO:0005694|GO:0007067|GO:0017076|GO:0000278|GO:0005634|GO:0051276|GO:0000796|GO:0030261|GO:0000819|GO:0005524|GO:0000280|GO:0007076|GO:0000070|GO:0000793|GO:0030554|GO:0006323	cell|reproduction|transporter activity|intracellular|meiotic cell cycle|protein complex|intracellular membrane-bounded organelle|cell cycle|cell division|chromosome segregation|nucleotide binding|chromosome|mitotic nuclear division|purine nucleotide binding|mitotic cell cycle|nucleus|chromosome organization|condensin complex|chromosome condensation|sister chromatid segregation|ATP binding|nuclear…	-	-	ko04111	Cell cycle - yeast	chr3:20566781-20574715	11.1828	2.77781	-2.00926	3.6781e-06	0.000129495	DOWN
107414211	LOC107414211	heat shock 22 kDa protein, mitochondrial-like	GO:0005623|GO:0050896|GO:0006950|GO:0005622|GO:0009408|GO:0043231|GO:0009266|GO:0005737|GO:0005739	cell|response to stimulus|response to stress|intracellular|response to heat|intracellular membrane-bounded organelle|response to temperature stimulus|cytoplasm|mitochondrion	-	-	ko04141	Protein processing in endoplasmic reticulum	chr3:20621542-20622804	1.50731	19.6759	3.70638	1.63628e-11	2.29848e-09	UP
107414223	LOC107414223	(R)-mandelonitrile lyase 3-like	GO:0008152|GO:0003824|GO:0048037|GO:0006807|GO:0016829|GO:0050662|GO:0000166|GO:0016832|GO:0050898|GO:0050660|GO:0046593	metabolic process|catalytic activity|cofactor binding|nitrogen compound metabolic process|lyase activity|coenzyme binding|nucleotide binding|aldehyde-lyase activity|nitrile metabolic process|flavin adenine dinucleotide binding|mandelonitrile lyase activity	-	-	ko01110|ko00460	Biosynthesis of secondary metabolites|Cyanoamino acid metabolism	chr1:6855151-6865171	0.643267	6.97685	3.43909	7.88004e-06	0.000244042	UP
107414228	LOC107414228	aldo-keto reductase family 4 member C9	GO:0005623|GO:0008152|GO:0003824|GO:0016491|GO:0005622|GO:0005737|GO:0055114	cell|metabolic process|catalytic activity|oxidoreductase activity|intracellular|cytoplasm|oxidation-reduction process	-	-	-	-	chr3:20343731-20347095	2.35428	0.206467	-3.5113	0.000519949	0.00799287	DOWN
107414275	LOC107414275	probable LRR receptor-like serine/threonine-protein kinase At1g53440	GO:0016020|GO:0005623|GO:0008152|GO:0003824|GO:0016740|GO:0044237|GO:0071944|GO:0044238|GO:0005886|GO:0019538|GO:0006793|GO:0016772|GO:0016773|GO:0016301|GO:0044267|GO:0006796|GO:0006464|GO:0016310|GO:0004672|GO:0006468|GO:0004674|GO:0046777	membrane|cell|metabolic process|catalytic activity|transferase activity|cellular metabolic process|cell periphery|primary metabolic process|plasma membrane|protein metabolic process|phosphorus metabolic process|transferase activity, transferring phosphorus-containing groups|phosphotransferase activity, alcohol group as acceptor|kinase activity|cellular protein metabolic process|phosphate-containi…	-	-	-	-	chr3:21059026-21062741	3.1443	40.1642	3.6751	1.15255e-05	0.000329855	UP
107414306	LOC107414306	heat shock 22 kDa protein, mitochondrial-like	GO:0005623|GO:0050896|GO:0006950|GO:0005622|GO:0009408|GO:0043231|GO:0009266|GO:0005737|GO:0005739	cell|response to stimulus|response to stress|intracellular|response to heat|intracellular membrane-bounded organelle|response to temperature stimulus|cytoplasm|mitochondrion	-	-	ko04141	Protein processing in endoplasmic reticulum	chr3:21313172-21314548	2.03169	24.0741	3.56673	8.59442e-12	1.25863e-09	UP
107414312	LOC107414312	pectinesterase 2-like	GO:0005576|GO:0016020|GO:0005623|GO:0050896|GO:0008152|GO:0003824|GO:0016787|GO:0006950|GO:0071554|GO:0030234|GO:0071944|GO:0009607|GO:0051707|GO:0044238|GO:0009620|GO:0005618|GO:0006952|GO:0016788|GO:0005975|GO:0009617|GO:0004857|GO:0071555|GO:0009505|GO:0016052|GO:0052689|GO:0046910|GO:0042545|GO:0042742|GO:0005976|GO:0050829|GO:0030599|GO:0000272|GO:0045488|GO:0045490	extracellular region|membrane|cell|response to stimulus|metabolic process|catalytic activity|hydrolase activity|response to stress|cell wall organization or biogenesis|enzyme regulator activity|cell periphery|response to biotic stimulus|response to other organism|primary metabolic process|response to fungus|cell wall|defense response|hydrolase activity, acting on ester bonds|carbohydrate metaboli…	-	-	ko01100|ko00500|ko00040	Metabolic pathways|Starch and sucrose metabolism|Pentose and glucuronate interconversions	chr3:21417689-21420972	136.751	32.2114	-2.08591	8.82811e-05	0.0018568	DOWN
107414326	LOC107414326	alpha-amylase/subtilisin inhibitor-like	GO:0005576|GO:0005623|GO:0008152|GO:0003824|GO:0016787|GO:0030234|GO:0071944|GO:0044238|GO:0048046|GO:0005618|GO:0008233|GO:0019538|GO:0004857|GO:0030414|GO:0006508|GO:0004866	extracellular region|cell|metabolic process|catalytic activity|hydrolase activity|enzyme regulator activity|cell periphery|primary metabolic process|apoplast|cell wall|peptidase activity|protein metabolic process|enzyme inhibitor activity|peptidase inhibitor activity|proteolysis|endopeptidase inhibitor activity	-	-	-	-	chr3:21097105-21097849	3.11524	16.5736	2.41148	0.00260233	0.0284428	UP
107414343	LOC107414343	21 kDa protein-like	GO:0008152|GO:0030234|GO:0009892|GO:0050790|GO:0004857|GO:0043086|GO:0046910	metabolic process|enzyme regulator activity|negative regulation of metabolic process|regulation of catalytic activity|enzyme inhibitor activity|negative regulation of catalytic activity|pectinesterase inhibitor activity	-	-	-	-	chr3:21490484-21491386	1.5379	115.041	6.22505	2.23631e-24	3.07851e-21	UP
107414352	LOC107414352	probable 2-oxoglutarate-dependent dioxygenase AOP1	GO:0005623|GO:0008152|GO:0003824|GO:0016491|GO:0005622|GO:0043169|GO:0051213|GO:0005737|GO:0055114|GO:0016705|GO:0016706|GO:0046872	cell|metabolic process|catalytic activity|oxidoreductase activity|intracellular|cation binding|dioxygenase activity|cytoplasm|oxidation-reduction process|oxidoreductase activity, acting on paired donors, with incorporation or reduction of molecular oxygen|oxidoreductase activity, acting on paired donors, with incorporation or reduction of molecular oxygen, 2-oxoglutarate as one donor, and incorpo…	-	-	-	-	chr3:21629203-21630370	1.63154	0.130024	-3.64938	0.00469073	0.0444868	DOWN
107414365	LOC107414365	subtilisin-like protease SBT1.3	GO:0005576|GO:0005623|GO:0008152|GO:0003824|GO:0016787|GO:0071944|GO:0044238|GO:0048046|GO:0005618|GO:0008233|GO:0019538|GO:0006508|GO:0008236|GO:0004175|GO:0004252	extracellular region|cell|metabolic process|catalytic activity|hydrolase activity|cell periphery|primary metabolic process|apoplast|cell wall|peptidase activity|protein metabolic process|proteolysis|serine-type peptidase activity|endopeptidase activity|serine-type endopeptidase activity	-	-	-	-	chr3:21836059-21838947	0.620992	0.0695033	-3.15942	0.00418301	0.0409554	DOWN
107414374	LOC107414374	PTI1-like tyrosine-protein kinase At3g15890	GO:0016020|GO:0005623|GO:0030054|GO:0023052|GO:0004871|GO:0050896|GO:0008152|GO:0003824|GO:0016740|GO:0051716|GO:0044237|GO:0004872|GO:0009506|GO:0071944|GO:0005911|GO:0038023|GO:0044238|GO:0005886|GO:0005515|GO:0009725|GO:0004888|GO:0019899|GO:0007165|GO:0019538|GO:0070887|GO:0006793|GO:0001653|GO:0016772|GO:0007154|GO:0016773|GO:0019199|GO:0016301|GO:0007166|GO:0044267|GO:0006796|GO:0009755|GO:…	membrane|cell|cell junction|signaling|signal transducer activity|response to stimulus|metabolic process|catalytic activity|transferase activity|cellular response to stimulus|cellular metabolic process|receptor activity|plasmodesma|cell periphery|cell-cell junction|signaling receptor activity|primary metabolic process|plasma membrane|protein binding|response to hormone|transmembrane signaling rece…	-	-	-	-	chr3:21908726-21910373	2.01249	0.192039	-3.38951	0.00317587	0.0331205	DOWN
107414400	LOC107414400	homeobox-leucine zipper protein ANTHOCYANINLESS 2-like	GO:0032502|GO:0005623|GO:0050896|GO:0008152|GO:0008289|GO:0003700|GO:0009653|GO:0005622|GO:0044237|GO:0009058|GO:0006807|GO:0044238|GO:0043473|GO:0043231|GO:0007275|GO:0042335|GO:0003676|GO:0006139|GO:0006725|GO:0010015|GO:0009314|GO:0048364|GO:0048869|GO:0019438|GO:0010467|GO:0005634|GO:0003677|GO:0030154|GO:0009416|GO:0010468|GO:0010053|GO:0051252|GO:0016070|GO:0090558|GO:0022622|GO:0010054|GO:…	developmental process|cell|response to stimulus|metabolic process|lipid binding|transcription factor activity, sequence-specific DNA binding|anatomical structure morphogenesis|intracellular|cellular metabolic process|biosynthetic process|nitrogen compound metabolic process|primary metabolic process|pigmentation|intracellular membrane-bounded organelle|multicellular organism development|cuticle de…	-	-	-	-	chr3:22133252-22138697	1.99068	0.280674	-2.8263	0.000533218	0.00817403	DOWN
107414401	LOC107414401	probable methyltransferase PMT16	GO:0016020|GO:0005623|GO:0008152|GO:0003824|GO:0032259|GO:0042175|GO:0031090|GO:0016740|GO:0031224|GO:0005622|GO:0005789|GO:0012505|GO:0098588|GO:0043231|GO:0016021|GO:0005737|GO:0005783|GO:0005794|GO:0008168	membrane|cell|metabolic process|catalytic activity|methylation|nuclear outer membrane-endoplasmic reticulum membrane network|organelle membrane|transferase activity|intrinsic component of membrane|intracellular|endoplasmic reticulum membrane|endomembrane system|bounding membrane of organelle|intracellular membrane-bounded organelle|integral component of membrane|cytoplasm|endoplasmic reticulum|Go…	-	-	-	-	chr3:22167144-22175012	5.56849	0.376612	-3.88614	7.11425e-08	4.1149e-06	DOWN
107414476	LOC107414476	uncharacterized LOC107414476	GO:0030054|GO:0000003|GO:0008152|GO:0044237|GO:0009506|GO:0005911|GO:0006807|GO:0051321|GO:0044238|GO:0006139|GO:0007049|GO:0006725|GO:0007131|GO:0051307|GO:0007126|GO:0007059|GO:0000712|GO:0045132|GO:0006259|GO:0051304|GO:0006310|GO:0000280|GO:0035825	cell junction|reproduction|metabolic process|cellular metabolic process|plasmodesma|cell-cell junction|nitrogen compound metabolic process|meiotic cell cycle|primary metabolic process|nucleobase-containing compound metabolic process|cell cycle|cellular aromatic compound metabolic process|reciprocal meiotic recombination|meiotic chromosome separation|meiotic nuclear division|chromosome segregation…	-	-	-	-	chr3:22515184-22524393	2.72142	0.254256	-3.42001	1.01122e-05	0.00029555	DOWN
107414483	LOC107414483	L-type lectin-domain containing receptor kinase IV.1-like	GO:0016020|GO:0005623|GO:0050896|GO:0003824|GO:0016740|GO:0071944|GO:0005886|GO:0016772|GO:0016301|GO:0009751	membrane|cell|response to stimulus|catalytic activity|transferase activity|cell periphery|plasma membrane|transferase activity, transferring phosphorus-containing groups|kinase activity|response to salicylic acid	-	-	-	-	chr1:7064295-7067150	2.59788	0.378816	-2.77777	0.000246179	0.00434474	DOWN
107414488	LOC107414488	25.3 kDa vesicle transport protein	GO:0051179|GO:0016020|GO:0005623|GO:0005622|GO:0043231|GO:0006810|GO:0005634	localization|membrane|cell|intracellular|intracellular membrane-bounded organelle|transport|nucleus	-	-	ko04145|ko04130	Phagosome|SNARE interactions in vesicular transport	chr3:22495010-22496320	0.287918	7.06159	4.61626	5.48379e-07	2.44304e-05	UP
107414505	LOC107414505	kinesin-like protein KIF22	GO:0005623|GO:0003824|GO:0016787|GO:0005622|GO:0012505|GO:0043234|GO:0043231|GO:0005737|GO:0005875|GO:0016817|GO:0005874|GO:0007017|GO:0005794|GO:0000166|GO:0016818|GO:0017076|GO:0005856|GO:0005871|GO:0007018|GO:0009536|GO:0005524|GO:0015630|GO:0016462|GO:0030554|GO:0009507|GO:0017111|GO:0003774|GO:0003777	cell|catalytic activity|hydrolase activity|intracellular|endomembrane system|protein complex|intracellular membrane-bounded organelle|cytoplasm|microtubule associated complex|hydrolase activity, acting on acid anhydrides|microtubule|microtubule-based process|Golgi apparatus|nucleotide binding|hydrolase activity, acting on acid anhydrides, in phosphorus-containing anhydrides|purine nucleotide bind…	-	-	-	-	chr3:22763900-22768506	6.66973	1.55253	-2.103	0.000109676	0.00221054	DOWN
107414511	LOC107414511	cytokinin hydroxylase-like	GO:0008152|GO:0019825|GO:0055114	metabolic process|oxygen binding|oxidation-reduction process	-	-	-	-	chr3:22857410-22860940	0.479754	3.80346	2.98694	0.000317813	0.00531593	UP
107414515	LOC107414515	oxalate--CoA ligase	GO:0032502|GO:0005576|GO:0005623|GO:0030054|GO:0000003|GO:0050896|GO:0008152|GO:0003824|GO:0003006|GO:0006950|GO:0005622|GO:0044237|GO:0016874|GO:0009506|GO:0009607|GO:0005911|GO:0050793|GO:0051707|GO:0048046|GO:0009725|GO:2000026|GO:0010214|GO:0009620|GO:0009791|GO:0043231|GO:0044281|GO:0007275|GO:0006952|GO:0043169|GO:0005737|GO:0009845|GO:0048316|GO:0000166|GO:0005829|GO:0010154|GO:0016208|GO:…	developmental process|extracellular region|cell|cell junction|reproduction|response to stimulus|metabolic process|catalytic activity|developmental process involved in reproduction|response to stress|intracellular|cellular metabolic process|ligase activity|plasmodesma|response to biotic stimulus|cell-cell junction|regulation of developmental process|response to other organism|apoplast|response to …	-	-	-	-	chr3:22822571-22825564	32.0854	4.87937	-2.71715	2.50092e-07	1.23841e-05	DOWN
107414516	LOC107414516	cytokinin hydroxylase-like	GO:0008152|GO:0019825|GO:0055114	metabolic process|oxygen binding|oxidation-reduction process	-	-	-	-	chr3:22867696-22871908	1.20146	8.58525	2.83707	9.5549e-06	0.000283476	UP
107414524	LOC107414524	ABC transporter C family member 10-like	-	-	-	-	-	-	chr3:22961158-22972536	1.10304	0.185798	-2.56968	0.00192377	0.022481	DOWN
107414526	LOC107414526	ABC transporter C family member 10-like	GO:0016020|GO:0005623|GO:0005215|GO:0003824|GO:0016787|GO:0031090|GO:0031224|GO:0005622|GO:0071944|GO:0022857|GO:0005886|GO:0098588|GO:0043231|GO:0016021|GO:0015238|GO:0005737|GO:0016817|GO:0008559|GO:0005774|GO:0000166|GO:0016818|GO:0017076|GO:0005773|GO:0016820|GO:0015399|GO:0005524|GO:0042626|GO:0016462|GO:0030554|GO:0017111|GO:0016887|GO:0042623	membrane|cell|transporter activity|catalytic activity|hydrolase activity|organelle membrane|intrinsic component of membrane|intracellular|cell periphery|transmembrane transporter activity|plasma membrane|bounding membrane of organelle|intracellular membrane-bounded organelle|integral component of membrane|drug transmembrane transporter activity|cytoplasm|hydrolase activity, acting on acid anhydri…	-	-	-	-	chr3:23000065-23004982	0.516056	5.44899	3.40039	8.24906e-10	7.94101e-08	UP
107414538	LOC107414538	acidic endochitinase-like	GO:0050896|GO:0008152|GO:0003824|GO:0016787|GO:0006950|GO:0009607|GO:0006807|GO:0051707|GO:0009620|GO:0006952|GO:0016798|GO:1901135|GO:0050832|GO:0004553|GO:0004568|GO:0006032	response to stimulus|metabolic process|catalytic activity|hydrolase activity|response to stress|response to biotic stimulus|nitrogen compound metabolic process|response to other organism|response to fungus|defense response|hydrolase activity, acting on glycosyl bonds|carbohydrate derivative metabolic process|defense response to fungus|hydrolase activity, hydrolyzing O-glycosyl compounds|chitinase…	-	-	ko01100|ko00520	Metabolic pathways|Amino sugar and nucleotide sugar metabolism	chr3:23052102-23053192	2.74027	78.3617	4.83776	6.86175e-09	5.17582e-07	UP
107414540	LOC107414540	acidic endochitinase-like	GO:0005576|GO:0050896|GO:0008152|GO:0003824|GO:0016787|GO:0006950|GO:0051716|GO:0006807|GO:0044238|GO:0005615|GO:0006970|GO:0009266|GO:0009409|GO:0016798|GO:1901135|GO:0070887|GO:0009611|GO:0005975|GO:0009415|GO:0009414|GO:0009314|GO:0007154|GO:0016052|GO:0009416|GO:0042631|GO:0009651|GO:0005976|GO:0004553|GO:0009642|GO:0000272|GO:0006032	extracellular region|response to stimulus|metabolic process|catalytic activity|hydrolase activity|response to stress|cellular response to stimulus|nitrogen compound metabolic process|primary metabolic process|extracellular space|response to osmotic stress|response to temperature stimulus|response to cold|hydrolase activity, acting on glycosyl bonds|carbohydrate derivative metabolic process|cellul…	-	-	ko01100|ko00520	Metabolic pathways|Amino sugar and nucleotide sugar metabolism	chr3:23314394-23315611	21.046	0.288964	-6.18651	8.13753e-14	1.71856e-11	DOWN
107414550	LOC107414550	probable plastid-lipid-associated protein 14, chloroplastic	GO:0005623|GO:0008152|GO:0003824|GO:0016740|GO:0005622|GO:0044237|GO:0044238|GO:0043231|GO:0019538|GO:0005737|GO:0006793|GO:0016772|GO:0000166|GO:0016773|GO:0017076|GO:0016301|GO:0044267|GO:0006796|GO:0009536|GO:0005524|GO:0006464|GO:0016310|GO:0004672|GO:0030554|GO:0009507|GO:0006468	cell|metabolic process|catalytic activity|transferase activity|intracellular|cellular metabolic process|primary metabolic process|intracellular membrane-bounded organelle|protein metabolic process|cytoplasm|phosphorus metabolic process|transferase activity, transferring phosphorus-containing groups|nucleotide binding|phosphotransferase activity, alcohol group as acceptor|purine nucleotide binding…	-	-	-	-	chr3:23365793-23368505	3.08405	27.9117	3.17797	8.04122e-10	7.7681e-08	UP
107414551	LOC107414551	probable plastid-lipid-associated protein 14, chloroplastic	GO:0005623|GO:0008152|GO:0003824|GO:0016740|GO:0005622|GO:0044237|GO:0044238|GO:0043231|GO:0019538|GO:0005737|GO:0006793|GO:0016772|GO:0000166|GO:0016773|GO:0017076|GO:0016301|GO:0044267|GO:0006796|GO:0009536|GO:0005524|GO:0006464|GO:0016310|GO:0004672|GO:0030554|GO:0009507|GO:0006468	cell|metabolic process|catalytic activity|transferase activity|intracellular|cellular metabolic process|primary metabolic process|intracellular membrane-bounded organelle|protein metabolic process|cytoplasm|phosphorus metabolic process|transferase activity, transferring phosphorus-containing groups|nucleotide binding|phosphotransferase activity, alcohol group as acceptor|purine nucleotide binding…	-	-	-	-	chr3:23371590-23377108	7.43321	49.8841	2.74652	6.79306e-12	1.01095e-09	UP
107414566	LOC107414566	uncharacterized LOC107414566	-	-	-	-	-	-	chr1:7177824-7179807	0.359915	2.80306	2.96128	0.00113491	0.0147459	UP
107414573	LOC107414573	cyclic nucleotide-gated ion channel 1-like	GO:0051179|GO:0016020|GO:0005623|GO:0005215|GO:0004872|GO:0071944|GO:0022857|GO:0005886|GO:0005515|GO:0006810|GO:0022891|GO:0055085|GO:0005516|GO:0000166|GO:0006811|GO:0015075|GO:0030551|GO:0017076|GO:0034220|GO:0030552|GO:0015267|GO:0030553|GO:0006812|GO:0008324|GO:0015276|GO:0030554|GO:0098655|GO:0005216|GO:0005242|GO:0030001|GO:0015672|GO:0005261|GO:0005217|GO:0005244|GO:0006813|GO:0005221|GO:…	localization|membrane|cell|transporter activity|receptor activity|cell periphery|transmembrane transporter activity|plasma membrane|protein binding|transport|substrate-specific transmembrane transporter activity|transmembrane transport|calmodulin binding|nucleotide binding|ion transport|ion transmembrane transporter activity|cyclic nucleotide binding|purine nucleotide binding|ion transmembrane tr…	-	-	ko04626	Plant-pathogen interaction	chr3:23817394-23821957	4.83099	21.3988	2.14714	1.23231e-07	6.62656e-06	UP
107414580	LOC107414580	bidirectional sugar transporter SWEET3	GO:0051179|GO:0016020|GO:0005623|GO:0005215|GO:0031224|GO:0071944|GO:0022857|GO:0005886|GO:0005515|GO:0016021|GO:0006810|GO:0022891|GO:0005887|GO:0015144|GO:0031226|GO:0071702|GO:0008643|GO:0051119	localization|membrane|cell|transporter activity|intrinsic component of membrane|cell periphery|transmembrane transporter activity|plasma membrane|protein binding|integral component of membrane|transport|substrate-specific transmembrane transporter activity|integral component of plasma membrane|carbohydrate transmembrane transporter activity|intrinsic component of plasma membrane|organic substance…	-	-	-	-	chr3:23901230-23903081	14.0001	0.215328	-6.02275	9.10943e-08	5.12885e-06	DOWN
107414582	LOC107414582	uncharacterized LOC107414582	GO:0005623|GO:0008152|GO:0003824|GO:0016740|GO:0005622|GO:0044237|GO:0044238|GO:0043234|GO:0016746|GO:0019538|GO:0031248|GO:0016747|GO:1990234|GO:0044267|GO:0016410|GO:0006464|GO:0016407|GO:0008080|GO:0031365|GO:0006473|GO:0006474|GO:0004596	cell|metabolic process|catalytic activity|transferase activity|intracellular|cellular metabolic process|primary metabolic process|protein complex|transferase activity, transferring acyl groups|protein metabolic process|protein acetyltransferase complex|transferase activity, transferring acyl groups other than amino-acyl groups|transferase complex|cellular protein metabolic process|N-acyltransfera…	-	-	-	-	chr3:23350530-23352278	2.18324	0.359461	-2.60257	0.00187472	0.0220765	DOWN
107414583	LOC107414583	cyclic nucleotide-gated ion channel 1-like	GO:0051179|GO:0016020|GO:0005623|GO:0005215|GO:0004872|GO:0071944|GO:0022857|GO:0005886|GO:0005515|GO:0006810|GO:0022891|GO:0055085|GO:0005516|GO:0000166|GO:0006811|GO:0015075|GO:0030551|GO:0017076|GO:0034220|GO:0030552|GO:0015267|GO:0030553|GO:0006812|GO:0008324|GO:0015276|GO:0030554|GO:0098655|GO:0005216|GO:0005242|GO:0030001|GO:0015672|GO:0005261|GO:0005217|GO:0005244|GO:0006813|GO:0005221|GO:…	localization|membrane|cell|transporter activity|receptor activity|cell periphery|transmembrane transporter activity|plasma membrane|protein binding|transport|substrate-specific transmembrane transporter activity|transmembrane transport|calmodulin binding|nucleotide binding|ion transport|ion transmembrane transporter activity|cyclic nucleotide binding|purine nucleotide binding|ion transmembrane tr…	-	-	ko04626	Plant-pathogen interaction	chr3:23543733-23548003	0.524787	3.48514	2.73141	0.000408029	0.006558	UP
107414585	LOC107414585	cyclic nucleotide-gated ion channel 1-like	GO:0051179|GO:0016020|GO:0005623|GO:0005215|GO:0004872|GO:0071944|GO:0022857|GO:0005886|GO:0005515|GO:0006810|GO:0022891|GO:0055085|GO:0005516|GO:0000166|GO:0006811|GO:0015075|GO:0030551|GO:0017076|GO:0034220|GO:0030552|GO:0015267|GO:0030553|GO:0006812|GO:0008324|GO:0015276|GO:0030554|GO:0098655|GO:0005216|GO:0005242|GO:0030001|GO:0015672|GO:0005261|GO:0005217|GO:0005244|GO:0006813|GO:0005221|GO:…	localization|membrane|cell|transporter activity|receptor activity|cell periphery|transmembrane transporter activity|plasma membrane|protein binding|transport|substrate-specific transmembrane transporter activity|transmembrane transport|calmodulin binding|nucleotide binding|ion transport|ion transmembrane transporter activity|cyclic nucleotide binding|purine nucleotide binding|ion transmembrane tr…	-	-	ko04626	Plant-pathogen interaction	chr3:23823394-23825253	3.91415	0.62658	-2.64313	0.000673999	0.0098705	DOWN
107414588	LOC107414588	probable receptor-like protein kinase At5g39020	GO:0016020|GO:0005623|GO:0030054|GO:0023052|GO:0004871|GO:0050896|GO:0008152|GO:0003824|GO:0016740|GO:0051716|GO:0044237|GO:0004872|GO:0009506|GO:0071944|GO:0005911|GO:0038023|GO:0044238|GO:0005886|GO:0005515|GO:0009725|GO:0004888|GO:0019899|GO:0007165|GO:0019538|GO:0070887|GO:0006793|GO:0001653|GO:0016772|GO:0007154|GO:0016773|GO:0019199|GO:0016301|GO:0007166|GO:0044267|GO:0006796|GO:0009755|GO:…	membrane|cell|cell junction|signaling|signal transducer activity|response to stimulus|metabolic process|catalytic activity|transferase activity|cellular response to stimulus|cellular metabolic process|receptor activity|plasmodesma|cell periphery|cell-cell junction|signaling receptor activity|primary metabolic process|plasma membrane|protein binding|response to hormone|transmembrane signaling rece…	-	-	-	-	chr3:23460419-23463013	0.191091	23.3829	6.93505	1.10322e-28	3.03739e-25	UP
107414589	LOC107414589	glycerophosphodiester phosphodiesterase protein kinase domain-containing GDPDL2-like	GO:0016020|GO:0005623|GO:0030054|GO:0023052|GO:0004871|GO:0050896|GO:0008152|GO:0003824|GO:0016740|GO:0051716|GO:0044237|GO:0004872|GO:0009506|GO:0071944|GO:0005911|GO:0038023|GO:0044238|GO:0005886|GO:0005515|GO:0009725|GO:0004888|GO:0019899|GO:0007165|GO:0019538|GO:0070887|GO:0006793|GO:0001653|GO:0016772|GO:0007154|GO:0016773|GO:0019199|GO:0016301|GO:0007166|GO:0044267|GO:0006796|GO:0009755|GO:…	membrane|cell|cell junction|signaling|signal transducer activity|response to stimulus|metabolic process|catalytic activity|transferase activity|cellular response to stimulus|cellular metabolic process|receptor activity|plasmodesma|cell periphery|cell-cell junction|signaling receptor activity|primary metabolic process|plasma membrane|protein binding|response to hormone|transmembrane signaling rece…	-	-	-	-	chr3:23481830-23484480	1.86757	21.1623	3.50226	1.57169e-08	1.09272e-06	UP
107414591	LOC107414591	glycerophosphodiester phosphodiesterase protein kinase domain-containing GDPDL2-like	GO:0016020|GO:0005623|GO:0030054|GO:0023052|GO:0004871|GO:0050896|GO:0008152|GO:0003824|GO:0016740|GO:0051716|GO:0044237|GO:0004872|GO:0009506|GO:0071944|GO:0005911|GO:0038023|GO:0044238|GO:0005886|GO:0005515|GO:0009725|GO:0004888|GO:0019899|GO:0007165|GO:0019538|GO:0070887|GO:0006793|GO:0001653|GO:0016772|GO:0007154|GO:0016773|GO:0019199|GO:0016301|GO:0007166|GO:0044267|GO:0006796|GO:0009755|GO:…	membrane|cell|cell junction|signaling|signal transducer activity|response to stimulus|metabolic process|catalytic activity|transferase activity|cellular response to stimulus|cellular metabolic process|receptor activity|plasmodesma|cell periphery|cell-cell junction|signaling receptor activity|primary metabolic process|plasma membrane|protein binding|response to hormone|transmembrane signaling rece…	-	-	-	-	chr3:23457359-23460428	0.274796	12.7251	5.53317	5.93236e-15	1.60127e-12	UP
107414614	LOC107414614	probable protein phosphatase 2C 51	GO:0032502|GO:0051179|GO:0016020|GO:0005623|GO:0000003|GO:0023052|GO:0005215|GO:0050896|GO:0008152|GO:0003824|GO:0016787|GO:0003006|GO:0048609|GO:0051716|GO:0044237|GO:0071944|GO:0032504|GO:0022857|GO:0050793|GO:0044238|GO:0005886|GO:0009725|GO:2000026|GO:0010431|GO:0010647|GO:0009791|GO:0007165|GO:0007275|GO:0019538|GO:0006810|GO:0043169|GO:2000692|GO:0016788|GO:0070887|GO:0009845|GO:0022891|GO:…	developmental process|localization|membrane|cell|reproduction|signaling|transporter activity|response to stimulus|metabolic process|catalytic activity|hydrolase activity|developmental process involved in reproduction|multicellular organismal reproductive process|cellular response to stimulus|cellular metabolic process|cell periphery|multicellular organism reproduction|transmembrane transporter ac…	-	-	ko04075|ko04931	Plant hormone signal transduction|Insulin resistance	chr3:23513448-23516765	2.51004	10.6309	2.08248	0.000215752	0.00387988	UP
107414646	LOC107414646	LRR receptor-like serine/threonine-protein kinase GSO2	GO:0005623|GO:0023052|GO:0050896|GO:0006950|GO:0051716|GO:0071944|GO:0009607|GO:0051707|GO:0009620|GO:0005618|GO:0007165|GO:0006952|GO:0007154|GO:0050832	cell|signaling|response to stimulus|response to stress|cellular response to stimulus|cell periphery|response to biotic stimulus|response to other organism|response to fungus|cell wall|signal transduction|defense response|cell communication|defense response to fungus	-	-	-	-	chr3:24336296-24339082	0.204452	1.73164	3.0823	0.00020929	0.0037909	UP
107414648	LOC107414648	probable tyrosine-protein phosphatase At1g05000	GO:0005623|GO:0050896|GO:0003824|GO:0016787|GO:0006950|GO:0005622|GO:0009607|GO:0051707|GO:0006952|GO:0016788|GO:0005737|GO:1900424|GO:0009617|GO:0042578|GO:0031347|GO:0042742|GO:0016791|GO:0004721|GO:0004725	cell|response to stimulus|catalytic activity|hydrolase activity|response to stress|intracellular|response to biotic stimulus|response to other organism|defense response|hydrolase activity, acting on ester bonds|cytoplasm|regulation of defense response to bacterium|response to bacterium|phosphoric ester hydrolase activity|regulation of defense response|defense response to bacterium|phosphatase act…	-	-	-	-	chr1:7274286-7278305	5.94293	1.29001	-2.20379	5.53e-05	0.00125104	DOWN
107414653	LOC107414653	late embryogenesis abundant protein At1g64065-like	GO:0016020|GO:0005623|GO:0031224|GO:0005622|GO:0043231|GO:0016021|GO:0005634	membrane|cell|intrinsic component of membrane|intracellular|intracellular membrane-bounded organelle|integral component of membrane|nucleus	-	-	-	-	chr3:24498287-24498937	4.10345	19.7254	2.26514	0.00169523	0.0203791	UP
107414686	LOC107414686	flavin-dependent oxidoreductase FOX2-like	-	-	-	-	-	-	chr3:24750422-24753396	2.67345	17.3327	2.69672	0.00208779	0.0239404	UP
107414687	LOC107414687	tetrahydrocannabinolic acid synthase-like	GO:0005623|GO:0009055|GO:0008152|GO:0003824|GO:0016491|GO:0005622|GO:0016614|GO:0005737|GO:0055114|GO:0016616|GO:0045551	cell|electron carrier activity|metabolic process|catalytic activity|oxidoreductase activity|intracellular|oxidoreductase activity, acting on CH-OH group of donors|cytoplasm|oxidation-reduction process|oxidoreductase activity, acting on the CH-OH group of donors, NAD or NADP as acceptor|cinnamyl-alcohol dehydrogenase activity	-	-	-	-	chr3:24756164-24757768	23.7198	4.3389	-2.45069	2.55397e-07	1.25564e-05	DOWN
107414720	LOC107414720	growth-regulating factor 4-like	GO:0005623|GO:0050896|GO:0005622|GO:0009725|GO:0043231|GO:0009415|GO:0030912|GO:0005634|GO:0009739	cell|response to stimulus|intracellular|response to hormone|intracellular membrane-bounded organelle|response to water|response to deep water|nucleus|response to gibberellin	-	-	-	-	chr3:24873641-24878414	1.43875	0.124977	-3.52509	0.00122146	0.0156853	DOWN
107414733	LOC107414733	ferric reduction oxidase 2-like	GO:0051179|GO:0016020|GO:0005623|GO:0050896|GO:0008152|GO:0003824|GO:0016491|GO:0031224|GO:0005622|GO:0071944|GO:0009607|GO:0051707|GO:0005886|GO:0043231|GO:0016021|GO:0006810|GO:0043169|GO:0055114|GO:0009617|GO:0006811|GO:0005634|GO:0046872|GO:0015688|GO:0000293|GO:0055072	localization|membrane|cell|response to stimulus|metabolic process|catalytic activity|oxidoreductase activity|intrinsic component of membrane|intracellular|cell periphery|response to biotic stimulus|response to other organism|plasma membrane|intracellular membrane-bounded organelle|integral component of membrane|transport|cation binding|oxidation-reduction process|response to bacterium|ion transpo…	-	-	-	-	chr3:25010884-25014188	4.48545	0.426811	-3.39358	0.000824264	0.0115021	DOWN
107414738	LOC107414738	uncharacterized LOC107414738	-	-	-	-	-	-	chr1:761886-763023	11.8813	2.63393	-2.1734	0.00300745	0.0318099	DOWN
107414747	LOC107414747	ferric reduction oxidase 4-like	GO:0051179|GO:0005576|GO:0016020|GO:0008152|GO:0003824|GO:0016491|GO:0031224|GO:0016021|GO:0006810|GO:0043169|GO:0055114|GO:0006811|GO:0046872|GO:0000293	localization|extracellular region|membrane|metabolic process|catalytic activity|oxidoreductase activity|intrinsic component of membrane|integral component of membrane|transport|cation binding|oxidation-reduction process|ion transport|metal ion binding|ferric-chelate reductase activity	-	-	-	-	chr3:25015077-25019061	44.8868	6.53289	-2.7805	0.00234932	0.0263468	DOWN
107414774	LOC107414774	probable receptor-like protein kinase At5g39020	GO:0016020|GO:0005623|GO:0030054|GO:0023052|GO:0004871|GO:0050896|GO:0008152|GO:0003824|GO:0016740|GO:0051716|GO:0044237|GO:0004872|GO:0009506|GO:0071944|GO:0005911|GO:0038023|GO:0044238|GO:0005886|GO:0005515|GO:0009725|GO:0004888|GO:0019899|GO:0007165|GO:0019538|GO:0070887|GO:0006793|GO:0001653|GO:0016772|GO:0007154|GO:0016773|GO:0019199|GO:0016301|GO:0007166|GO:0044267|GO:0006796|GO:0009755|GO:…	membrane|cell|cell junction|signaling|signal transducer activity|response to stimulus|metabolic process|catalytic activity|transferase activity|cellular response to stimulus|cellular metabolic process|receptor activity|plasmodesma|cell periphery|cell-cell junction|signaling receptor activity|primary metabolic process|plasma membrane|protein binding|response to hormone|transmembrane signaling rece…	-	-	-	-	chr3:25361854-25364924	2.4168	10.3698	2.10121	0.00175972	0.0209462	UP
107414781	LOC107414781	uncharacterized LOC107414781	GO:0005623|GO:0008152|GO:0003824|GO:0016740|GO:0005622|GO:0044237|GO:0044238|GO:0043234|GO:0016746|GO:0019538|GO:0031248|GO:0016747|GO:1990234|GO:0044267|GO:0016410|GO:0006464|GO:0016407|GO:0008080|GO:0031365|GO:0006473|GO:0006474|GO:0004596	cell|metabolic process|catalytic activity|transferase activity|intracellular|cellular metabolic process|primary metabolic process|protein complex|transferase activity, transferring acyl groups|protein metabolic process|protein acetyltransferase complex|transferase activity, transferring acyl groups other than amino-acyl groups|transferase complex|cellular protein metabolic process|N-acyltransfera…	-	-	-	-	chr3:25432731-25434479	1.64322	0.151129	-3.44267	0.000523125	0.00803273	DOWN
107414798	LOC107414798	probable plastid-lipid-associated protein 14, chloroplastic	GO:0005623|GO:0008152|GO:0003824|GO:0016740|GO:0005622|GO:0044237|GO:0044238|GO:0043231|GO:0019538|GO:0005737|GO:0006793|GO:0016772|GO:0000166|GO:0016773|GO:0017076|GO:0016301|GO:0044267|GO:0006796|GO:0009536|GO:0005524|GO:0006464|GO:0016310|GO:0004672|GO:0030554|GO:0009507|GO:0006468	cell|metabolic process|catalytic activity|transferase activity|intracellular|cellular metabolic process|primary metabolic process|intracellular membrane-bounded organelle|protein metabolic process|cytoplasm|phosphorus metabolic process|transferase activity, transferring phosphorus-containing groups|nucleotide binding|phosphotransferase activity, alcohol group as acceptor|purine nucleotide binding…	-	-	-	-	chr3:25447161-25452510	6.57124	53.0361	3.01274	1.17244e-13	2.39108e-11	UP
107414846	LOC107414846	cell division cycle 20.2, cofactor of APC complex-like	GO:0016020|GO:0005623|GO:0023052|GO:0004871|GO:0050896|GO:0008152|GO:0019898|GO:0051716|GO:0005622|GO:0044237|GO:0071944|GO:0044238|GO:0005886|GO:0043234|GO:0005515|GO:0031234|GO:0019899|GO:0007165|GO:0043231|GO:0019538|GO:0007049|GO:0009898|GO:0005834|GO:0007154|GO:0051301|GO:0019897|GO:0033597|GO:0019900|GO:0007067|GO:0000278|GO:0005634|GO:0044267|GO:0000280|GO:0006464|GO:0070647|GO:0016567	membrane|cell|signaling|signal transducer activity|response to stimulus|metabolic process|extrinsic component of membrane|cellular response to stimulus|intracellular|cellular metabolic process|cell periphery|primary metabolic process|plasma membrane|protein complex|protein binding|extrinsic component of cytoplasmic side of plasma membrane|enzyme binding|signal transduction|intracellular membrane-…	-	-	ko04110|ko04120|ko04111|ko04113|ko04114	Cell cycle|Ubiquitin mediated proteolysis|Cell cycle - yeast|Meiosis - yeast|Oocyte meiosis	chr3:25948378-25951235	45.0382	9.05414	-2.3145	2.36143e-09	2.00046e-07	DOWN
107414862	LOC107414862	laccase-15-like	GO:0005576|GO:0050896|GO:0008152|GO:0003824|GO:0016491|GO:0044237|GO:0009058|GO:0048046|GO:0043169|GO:0006725|GO:0055114|GO:0019748|GO:0009698|GO:0019439|GO:0009808|GO:0019438|GO:0009699|GO:0044550|GO:0046872|GO:0046688|GO:0010038|GO:0016682|GO:0052716|GO:0009809|GO:0010023|GO:0046274|GO:0046914|GO:0005507	extracellular region|response to stimulus|metabolic process|catalytic activity|oxidoreductase activity|cellular metabolic process|biosynthetic process|apoplast|cation binding|cellular aromatic compound metabolic process|oxidation-reduction process|secondary metabolic process|phenylpropanoid metabolic process|aromatic compound catabolic process|lignin metabolic process|aromatic compound biosynthet…	-	-	-	-	chr3:25682346-25684705	0.361864	7.92841	4.45351	3.66305e-10	3.92417e-08	UP
107414867	LOC107414867	anthocyanidin 3-O-glucosyltransferase 2-like	GO:0050896|GO:0008152|GO:0003824|GO:0016740|GO:0044237|GO:0016757|GO:0080167|GO:0006725|GO:0019748|GO:0009698|GO:0008194|GO:0016758|GO:0046527|GO:0035251|GO:0047213|GO:0047893|GO:0080043	response to stimulus|metabolic process|catalytic activity|transferase activity|cellular metabolic process|transferase activity, transferring glycosyl groups|response to karrikin|cellular aromatic compound metabolic process|secondary metabolic process|phenylpropanoid metabolic process|UDP-glycosyltransferase activity|transferase activity, transferring hexosyl groups|glucosyltransferase activity|UD…	-	-	ko01100|ko01110|ko00944	Metabolic pathways|Biosynthesis of secondary metabolites|Flavone and flavonol biosynthesis	chr3:25734639-25736994	5.29511	27.3202	2.36724	5.61442e-07	2.48915e-05	UP
107414911	LOC107414911	uncharacterized LOC107414911	GO:0003824|GO:0016740|GO:0016746	catalytic activity|transferase activity|transferase activity, transferring acyl groups	-	-	-	-	chr3:26627800-26628658	28.037	0.422407	-6.05256	1.63241e-14	4.08577e-12	DOWN
107414939	LOC107414939	uncharacterized LOC107414939	GO:0003824|GO:0016740|GO:0016746	catalytic activity|transferase activity|transferase activity, transferring acyl groups	-	-	-	-	chr3:26600525-26601742	45.0876	0.881548	-5.67655	4.65665e-18	1.94253e-15	DOWN
107414940	LOC107414940	uncharacterized LOC107414940	GO:0003824|GO:0016740|GO:0016746	catalytic activity|transferase activity|transferase activity, transferring acyl groups	-	-	-	-	chr3:26579778-26618357	0.0311524	1.41937	5.50977	5.87273e-05	0.00131867	UP
107414943	LOC107414943	uncharacterized LOC107414943	GO:0043169|GO:0000166|GO:0017076|GO:0046872|GO:0043531|GO:0030554|GO:0046914|GO:0008270	cation binding|nucleotide binding|purine nucleotide binding|metal ion binding|ADP binding|adenyl nucleotide binding|transition metal ion binding|zinc ion binding	-	-	-	-	chr3:26449478-26452266	0.39075	1.77751	2.18554	0.00505123	0.0472065	UP
107414953	LOC107414953	uncharacterized LOC107414953	GO:0016020|GO:0005623|GO:0005622|GO:0071944|GO:0005886|GO:0043231|GO:0005737|GO:0005739	membrane|cell|intracellular|cell periphery|plasma membrane|intracellular membrane-bounded organelle|cytoplasm|mitochondrion	-	-	-	-	chr3:26463192-26464601	0.897912	4.41995	2.29938	0.00309072	0.0324661	UP
107414970	LOC107414970	elongation factor 2-like	GO:0005576|GO:0016020|GO:0005623|GO:0030054|GO:0050896|GO:0008152|GO:0003824|GO:0016787|GO:0031090|GO:0006950|GO:0005622|GO:0044237|GO:0009506|GO:0071944|GO:0005911|GO:0009058|GO:0006807|GO:0012505|GO:0044238|GO:0005886|GO:0043233|GO:0048046|GO:0009725|GO:0098588|GO:0043231|GO:0009266|GO:0019538|GO:0043169|GO:0003676|GO:0009409|GO:0005737|GO:0016817|GO:0005774|GO:0005794|GO:0006518|GO:0016818|GO:…	extracellular region|membrane|cell|cell junction|response to stimulus|metabolic process|catalytic activity|hydrolase activity|organelle membrane|response to stress|intracellular|cellular metabolic process|plasmodesma|cell periphery|cell-cell junction|biosynthetic process|nitrogen compound metabolic process|endomembrane system|primary metabolic process|plasma membrane|organelle lumen|apoplast|resp…	-	-	ko04152	AMPK signaling pathway	chr3:26068536-26072023	17.2918	78.2259	2.17755	2.4838e-09	2.08488e-07	UP
107414972	LOC107414972	homeobox-leucine zipper protein ATHB-12-like	GO:0032502|GO:0005623|GO:0050896|GO:0008152|GO:0003700|GO:0006950|GO:0005622|GO:0044237|GO:0009607|GO:0009058|GO:0006807|GO:0051707|GO:0044238|GO:0009725|GO:0009615|GO:0043231|GO:0006970|GO:0007275|GO:0003676|GO:0006139|GO:0006725|GO:0009415|GO:0009414|GO:0009737|GO:0019438|GO:0010467|GO:0005634|GO:0003677|GO:0010468|GO:0010628|GO:0051252|GO:0009651|GO:0016070|GO:0045893|GO:0032774|GO:0043565|GO:…	developmental process|cell|response to stimulus|metabolic process|transcription factor activity, sequence-specific DNA binding|response to stress|intracellular|cellular metabolic process|response to biotic stimulus|biosynthetic process|nitrogen compound metabolic process|response to other organism|primary metabolic process|response to hormone|response to virus|intracellular membrane-bounded organ…	-	-	-	-	chr3:26073023-26074380	1.44678	13.1283	3.18176	1.0788e-06	4.40022e-05	UP
107414998	LOC107414998	two-component response regulator-like APRR5	GO:0048511|GO:0005623|GO:0023052|GO:0004871|GO:0050896|GO:0008152|GO:0051716|GO:0005622|GO:0009892|GO:0044237|GO:0009058|GO:0006807|GO:0007623|GO:0044238|GO:0005515|GO:0007165|GO:0043231|GO:0009266|GO:0003676|GO:0006139|GO:0006725|GO:0000156|GO:0009314|GO:0007154|GO:0019438|GO:0010467|GO:0010017|GO:0005634|GO:0003677|GO:0009416|GO:0010468|GO:0051252|GO:0035556|GO:0010629|GO:0016070|GO:0045892|GO:…	rhythmic process|cell|signaling|signal transducer activity|response to stimulus|metabolic process|cellular response to stimulus|intracellular|negative regulation of metabolic process|cellular metabolic process|biosynthetic process|nitrogen compound metabolic process|circadian rhythm|primary metabolic process|protein binding|signal transduction|intracellular membrane-bounded organelle|response to …	-	-	ko04712	Circadian rhythm - plant	chr3:26259847-26264662	4.38646	22.3682	2.35032	1.92704e-09	1.6684e-07	UP
107415024	LOC107415024	malate synthase	GO:0005623|GO:0008152|GO:0003824|GO:0016740|GO:0005622|GO:0044237|GO:0044238|GO:0016746|GO:0043231|GO:0044281|GO:0044262|GO:0005737|GO:0006081|GO:0005975|GO:0006097|GO:0005634|GO:0046912|GO:0046487|GO:0019752|GO:0004474	cell|metabolic process|catalytic activity|transferase activity|intracellular|cellular metabolic process|primary metabolic process|transferase activity, transferring acyl groups|intracellular membrane-bounded organelle|small molecule metabolic process|cellular carbohydrate metabolic process|cytoplasm|cellular aldehyde metabolic process|carbohydrate metabolic process|glyoxylate cycle|nucleus|transf…	-	-	ko01100|ko01110|ko01120|ko01200|ko00620|ko00630	Metabolic pathways|Biosynthesis of secondary metabolites|Microbial metabolism in diverse environments|Carbon metabolism|Pyruvate metabolism|Glyoxylate and dicarboxylate metabolism	chr4:26017-28589	0.398241	11.491	4.85072	1.55008e-15	4.54008e-13	UP
107415037	LOC107415037	arabinogalactan peptide 13-like	GO:0032502|GO:0016020|GO:0005623|GO:0040007|GO:0031224|GO:0009653|GO:0071944|GO:0016049|GO:0048589|GO:0005886|GO:0005515|GO:0060560|GO:0007275|GO:0010015|GO:0031225|GO:0048364|GO:0048869|GO:0048767|GO:0030154|GO:0080147|GO:0010053|GO:0090558|GO:0022622|GO:0010054|GO:0090627|GO:0048765	developmental process|membrane|cell|growth|intrinsic component of membrane|anatomical structure morphogenesis|cell periphery|cell growth|developmental growth|plasma membrane|protein binding|developmental growth involved in morphogenesis|multicellular organism development|root morphogenesis|anchored component of membrane|root development|cellular developmental process|root hair elongation|cell dif…	-	-	-	-	chr4:103950-104785	88.8293	17.4865	-2.34479	1.1673e-07	6.364e-06	DOWN
107415044	LOC107415044	ethylene-responsive transcription factor RAP2-11	GO:0032502|GO:0005623|GO:0023052|GO:0050896|GO:0008152|GO:0003700|GO:0006950|GO:0051716|GO:0005622|GO:0044237|GO:0009058|GO:0006807|GO:0044238|GO:0009725|GO:0009791|GO:0007165|GO:0043231|GO:0007275|GO:0048569|GO:0006979|GO:0003676|GO:0006139|GO:0006725|GO:0070887|GO:0048364|GO:0048513|GO:0007154|GO:0009723|GO:0019438|GO:0010467|GO:0005634|GO:0003677|GO:0010468|GO:0009755|GO:0010038|GO:0051252|GO:…	developmental process|cell|signaling|response to stimulus|metabolic process|transcription factor activity, sequence-specific DNA binding|response to stress|cellular response to stimulus|intracellular|cellular metabolic process|biosynthetic process|nitrogen compound metabolic process|primary metabolic process|response to hormone|post-embryonic development|signal transduction|intracellular membrane…	-	-	-	-	chr4:147737-150147	1.37406	0.14598	-3.2346	0.000937358	0.0126768	DOWN
107415055	LOC107415055	feruloyl CoA ortho-hydroxylase 1-like	GO:0005623|GO:0050896|GO:0008152|GO:0003824|GO:0016491|GO:0006950|GO:0051716|GO:0005622|GO:0044237|GO:0009058|GO:0008219|GO:0006979|GO:0043169|GO:0051213|GO:0006725|GO:0005737|GO:0070887|GO:0055114|GO:0019748|GO:0016705|GO:0009698|GO:0016706|GO:0019438|GO:0009699|GO:0044550|GO:0046872|GO:0042542|GO:0034599|GO:0012501|GO:0000302|GO:0009805|GO:0070301|GO:0034614|GO:0097468|GO:0010421	cell|response to stimulus|metabolic process|catalytic activity|oxidoreductase activity|response to stress|cellular response to stimulus|intracellular|cellular metabolic process|biosynthetic process|cell death|response to oxidative stress|cation binding|dioxygenase activity|cellular aromatic compound metabolic process|cytoplasm|cellular response to chemical stimulus|oxidation-reduction process|sec…	-	-	-	-	chr4:231159-232586	5.45102	31.8928	2.54863	8.89307e-06	0.000268175	UP
107415069	LOC107415069	IAA-amino acid hydrolase ILR1-like	GO:0005623|GO:0008152|GO:0003824|GO:0016787|GO:0005622|GO:0044237|GO:0012505|GO:0044238|GO:0016810|GO:0008233|GO:0043231|GO:0019538|GO:0005737|GO:0005783|GO:0009850|GO:0006508|GO:0010178|GO:0009536|GO:0010210|GO:0010211|GO:0009507|GO:0008237	cell|metabolic process|catalytic activity|hydrolase activity|intracellular|cellular metabolic process|endomembrane system|primary metabolic process|hydrolase activity, acting on carbon-nitrogen (but not peptide) bonds|peptidase activity|intracellular membrane-bounded organelle|protein metabolic process|cytoplasm|endoplasmic reticulum|auxin metabolic process|proteolysis|IAA-amino acid conjugate hy…	-	-	-	-	chr4:363614-366829	13.2811	3.25159	-2.03016	1.01408e-05	0.000296074	DOWN
107415089	LOC107415089	DNA (cytosine-5)-methyltransferase CMT3-like	GO:0032502|GO:0005623|GO:0000003|GO:0008152|GO:0003824|GO:0032259|GO:0003006|GO:0016740|GO:0005622|GO:0009892|GO:0044237|GO:0009058|GO:0006807|GO:0044238|GO:0003682|GO:0009791|GO:0043231|GO:0007275|GO:0019538|GO:0003676|GO:0006139|GO:0007049|GO:0006725|GO:0016458|GO:0016570|GO:0048316|GO:0009793|GO:0051301|GO:0010069|GO:0008168|GO:0008356|GO:0010154|GO:0000910|GO:0019438|GO:0010467|GO:0000278|GO:…	developmental process|cell|reproduction|metabolic process|catalytic activity|methylation|developmental process involved in reproduction|transferase activity|intracellular|negative regulation of metabolic process|cellular metabolic process|biosynthetic process|nitrogen compound metabolic process|primary metabolic process|chromatin binding|post-embryonic development|intracellular membrane-bounded o…	-	-	ko01100|ko00270	Metabolic pathways|Cysteine and methionine metabolism	chr4:495142-504152	9.41718	1.9016	-2.30808	3.26369e-06	0.000115978	DOWN
107415098	LOC107415098	transmembrane protein 45A-like	GO:0005623|GO:0005622|GO:0043231|GO:0005737|GO:0009536|GO:0009507	cell|intracellular|intracellular membrane-bounded organelle|cytoplasm|plastid|chloroplast	-	-	-	-	chr4:451956-453411	4.09363	25.5248	2.64045	1.87898e-06	7.17506e-05	UP
107415104	LOC107415104	peroxidase A2-like	GO:0016209|GO:0003824|GO:0016491|GO:0004601|GO:0046906|GO:0020037	antioxidant activity|catalytic activity|oxidoreductase activity|peroxidase activity|tetrapyrrole binding|heme binding	-	-	ko01100|ko01110|ko00940	Metabolic pathways|Biosynthesis of secondary metabolites|Phenylpropanoid biosynthesis	chr4:561120-563369	6.59155	63.1928	3.26107	1.689e-06	6.57731e-05	UP
107415129	LOC107415129	lysine histidine transporter 1-like	GO:0051179|GO:0016020|GO:0005623|GO:0005215|GO:0050896|GO:0031224|GO:0071944|GO:0022857|GO:0005886|GO:0016021|GO:0006810|GO:0080167|GO:0022891|GO:0071702|GO:0006811|GO:0015075|GO:0005342|GO:0015711|GO:0015293|GO:0008509|GO:0006865|GO:0006820|GO:0043090|GO:0015171|GO:0008514	localization|membrane|cell|transporter activity|response to stimulus|intrinsic component of membrane|cell periphery|transmembrane transporter activity|plasma membrane|integral component of membrane|transport|response to karrikin|substrate-specific transmembrane transporter activity|organic substance transport|ion transport|ion transmembrane transporter activity|organic acid transmembrane transpor…	-	-	-	-	chr4:702201-704726	8.86394	1.36697	-2.69696	0.000460916	0.00727218	DOWN
107415152	LOC107415152	lysine histidine transporter 1-like	GO:0051179|GO:0016020|GO:0005623|GO:0005215|GO:0050896|GO:0031224|GO:0071944|GO:0022857|GO:0005886|GO:0016021|GO:0006810|GO:0080167|GO:0022891|GO:0071702|GO:0006811|GO:0015075|GO:0005342|GO:0015711|GO:0015293|GO:0008509|GO:0006865|GO:0006820|GO:0043090|GO:0015171|GO:0008514	localization|membrane|cell|transporter activity|response to stimulus|intrinsic component of membrane|cell periphery|transmembrane transporter activity|plasma membrane|integral component of membrane|transport|response to karrikin|substrate-specific transmembrane transporter activity|organic substance transport|ion transport|ion transmembrane transporter activity|organic acid transmembrane transpor…	-	-	-	-	chr4:785918-790776	0.198191	1.14435	2.52956	4.34886e-05	0.00102248	UP
107415168	LOC107415168	probable LRR receptor-like serine/threonine-protein kinase At4g08850	GO:0016020|GO:0005623|GO:0030054|GO:0023052|GO:0004871|GO:0050896|GO:0008152|GO:0003824|GO:0016740|GO:0051716|GO:0044237|GO:0004872|GO:0009506|GO:0071944|GO:0005911|GO:0038023|GO:0044238|GO:0005886|GO:0005515|GO:0009725|GO:0004888|GO:0019899|GO:0007165|GO:0019538|GO:0070887|GO:0006793|GO:0001653|GO:0016772|GO:0007154|GO:0016773|GO:0019199|GO:0016301|GO:0007166|GO:0044267|GO:0006796|GO:0009755|GO:…	membrane|cell|cell junction|signaling|signal transducer activity|response to stimulus|metabolic process|catalytic activity|transferase activity|cellular response to stimulus|cellular metabolic process|receptor activity|plasmodesma|cell periphery|cell-cell junction|signaling receptor activity|primary metabolic process|plasma membrane|protein binding|response to hormone|transmembrane signaling rece…	-	-	-	-	chr4:1449108-1451766	0.115708	2.24807	4.28013	4.85302e-06	0.000162349	UP
107415178	LOC107415178	ferredoxin	GO:0005515	protein binding	-	-	ko00195	Photosynthesis	chr4:1288269-1289178	68.6426	13.2	-2.37856	9.75685e-06	0.000287916	DOWN
107415180	LOC107415180	ATP-dependent DNA helicase Q-like 4A	GO:0005623|GO:0030054|GO:0050896|GO:0008152|GO:0003824|GO:0016787|GO:0006950|GO:0051716|GO:0005622|GO:0044237|GO:0009506|GO:0005911|GO:0009058|GO:0006807|GO:0044238|GO:0009725|GO:0043231|GO:0009266|GO:0043169|GO:0003676|GO:0009409|GO:0006139|GO:0006725|GO:0070887|GO:0006281|GO:0016817|GO:0000723|GO:0000166|GO:0016818|GO:0070417|GO:0006974|GO:0006302|GO:0009737|GO:0017076|GO:0005634|GO:0051276|GO:…	cell|cell junction|response to stimulus|metabolic process|catalytic activity|hydrolase activity|response to stress|cellular response to stimulus|intracellular|cellular metabolic process|plasmodesma|cell-cell junction|biosynthetic process|nitrogen compound metabolic process|primary metabolic process|response to hormone|intracellular membrane-bounded organelle|response to temperature stimulus|catio…	-	-	ko03460|ko03440	Fanconi anemia pathway|Homologous recombination	chr4:1260711-1269499	3.80386	0.702013	-2.43789	2.39993e-05	0.000619258	DOWN
107415181	LOC107415181	MLO-like protein 4	GO:0016020|GO:0005623|GO:0050896|GO:0006950|GO:0071944|GO:0005886|GO:0005515|GO:0006952|GO:0005516	membrane|cell|response to stimulus|response to stress|cell periphery|plasma membrane|protein binding|defense response|calmodulin binding	-	-	-	-	chr4:1289537-1294470	3.96545	0.210543	-4.23529	5.41614e-07	2.42073e-05	DOWN
107415195	LOC107415195	alcohol dehydrogenase 1	GO:0016020|GO:0005623|GO:0050896|GO:0008152|GO:0003824|GO:0016491|GO:0006950|GO:0005622|GO:0044237|GO:0071944|GO:0012505|GO:0005886|GO:0070482|GO:0016614|GO:0001666|GO:0043231|GO:0006970|GO:0043169|GO:0006091|GO:0005737|GO:0055114|GO:0005794|GO:0005829|GO:0016616|GO:0046872|GO:0045333|GO:0010038|GO:0009651|GO:0046686|GO:0004022|GO:0046914|GO:0008270	membrane|cell|response to stimulus|metabolic process|catalytic activity|oxidoreductase activity|response to stress|intracellular|cellular metabolic process|cell periphery|endomembrane system|plasma membrane|response to oxygen levels|oxidoreductase activity, acting on CH-OH group of donors|response to hypoxia|intracellular membrane-bounded organelle|response to osmotic stress|cation binding|genera…	-	-	ko01100|ko01110|ko01120|ko00010|ko00350|ko00592|ko00071	Metabolic pathways|Biosynthesis of secondary metabolites|Microbial metabolism in diverse environments|Glycolysis / Gluconeogenesis|Tyrosine metabolism|alpha-Linolenic acid metabolism|Fatty acid degradation	chr4:1471018-1474007	88.9113	8.70655	-3.35219	1.10303e-13	2.26631e-11	DOWN
107415205	LOC107415205	uncharacterized LOC107415205	GO:0005623|GO:0005622|GO:0043231|GO:0005634	cell|intracellular|intracellular membrane-bounded organelle|nucleus	-	-	-	-	chr1:9031-10203	2.498	10.3894	2.05627	0.000261841	0.00457424	UP
[truncated: 1,179 more rows]

## Sheet: UP
Gene ID	Gene name	Description	GO_id	GO_term	KO_ID	KO_Description	kegg_id	kegg_term	locus	g2 (1 h)	g3 (12 h)	log2(FC)	P value	Qvalue	UPDOWN
107420073	LOC107420073	17.6 kDa class II heat shock protein-like	GO:0005623|GO:0050896|GO:0006950|GO:0005622|GO:0009408|GO:0009266|GO:0005737	cell|response to stimulus|response to stress|intracellular|response to heat|response to temperature stimulus|cytoplasm	-	-	ko04141	Protein processing in endoplasmic reticulum	chr6:2542699-2543754	0.0552905	39.8146	9.49205	1.52284e-22	1.61257e-19	UP
[truncated: 795 more rows]

## Sheet: DOWN
Gene ID	Gene name	Description	GO_id	GO_term	KO_ID	KO_Description	kegg_id	kegg_term	locus	g2 (1 h)	g3 (12 h)	log2(FC)	P value	Qvalue	UPDOWN
[truncated: 998 more rows]
