# Supplementary material for: Transcriptome analysis of genes involved in defense against alkaline stress in roots of wild jujube (Ziziphus acidojujuba)
Source: PLoS One. 2017 Oct 4;12(10):e0185732. doi: 10.1371/journal.pone.0185732 (PMC5627934; doi:10.1371/journal.pone.0185732)
Supplement: S9 Table — (XLSX) [file pone.0185732.s009.xlsx]

## Sheet: STPK
Gene_ID	Gene_name	Description	GO_id	GO_term	KO_ID	KO_Description	kegg_id	kegg_term	locus	log2(0 h)	log2( 1 h)	log2(12 h)
107403655	LOC107403655	probable LRR receptor-like serine/threonine-protein kinase At1g51860	GO:0005576|GO:0003824|GO:0016740|GO:0016772|GO:0016301	extracellular region|catalytic activity|transferase activity|transferase activity, transferring phosphorus-containing groups|kinase activity	-	-	-	-	chr1:38383541-38387853	3.04451829409319	2.85315037752064	-1.50340761493598
107403681	LOC107403681	probable LRR receptor-like serine/threonine-protein kinase At1g05700	GO:0016020|GO:0005623|GO:0008152|GO:0003824|GO:0016740|GO:0044237|GO:0071944|GO:0044238|GO:0005886|GO:0019538|GO:0006793|GO:0016772|GO:0000166|GO:0016773|GO:0017076|GO:0016301|GO:0044267|GO:0006796|GO:0005524|GO:0006464|GO:0016310|GO:0004672|GO:0030554|GO:0006468	membrane|cell|metabolic process|catalytic activity|transferase activity|cellular metabolic process|cell periphery|primary metabolic process|plasma membrane|protein metabolic process|phosphorus metabolic process|transferase activity, transferring phosphorus-containing groups|nucleotide binding|phosphotransferase activity, alcohol group as acceptor|purine nucleotide binding|kinase activity|cellular…	-	-	-	-	chr1:38433268-38437207	3.42167612362038	1.26367044793086	-1.89869016322255
107403692	LOC107403692	probable LRR receptor-like serine/threonine-protein kinase At1g05700	GO:0016020|GO:0005623|GO:0023052|GO:0050896|GO:0003824|GO:0016740|GO:0042995|GO:0006950|GO:0051716|GO:0071944|GO:0009607|GO:0051707|GO:0005886|GO:0009725|GO:0009620|GO:0007165|GO:0090406|GO:0006952|GO:0070887|GO:0009968|GO:0016772|GO:0007154|GO:0009966|GO:0000166|GO:0009737|GO:0009788|GO:0017076|GO:0016301|GO:0009755|GO:0009787|GO:0050832|GO:0005524|GO:0009738|GO:0030554|GO:0071215	membrane|cell|signaling|response to stimulus|catalytic activity|transferase activity|cell projection|response to stress|cellular response to stimulus|cell periphery|response to biotic stimulus|response to other organism|plasma membrane|response to hormone|response to fungus|signal transduction|pollen tube|defense response|cellular response to chemical stimulus|negative regulation of signal transd…	-	-	-	-	chr1:38440596-38444783	6.22122596054785	5.7878043442129	3.45373343976292
107403772	LOC107403772	probable LRR receptor-like serine/threonine-protein kinase At1g51880	GO:0016020|GO:0005623|GO:0023052|GO:0050896|GO:0003824|GO:0016740|GO:0042995|GO:0006950|GO:0051716|GO:0071944|GO:0009607|GO:0051707|GO:0005886|GO:0009725|GO:0009620|GO:0007165|GO:0090406|GO:0006952|GO:0070887|GO:0009968|GO:0016772|GO:0007154|GO:0009966|GO:0000166|GO:0009737|GO:0009788|GO:0017076|GO:0016301|GO:0009755|GO:0009787|GO:0050832|GO:0005524|GO:0009738|GO:0030554|GO:0071215	membrane|cell|signaling|response to stimulus|catalytic activity|transferase activity|cell projection|response to stress|cellular response to stimulus|cell periphery|response to biotic stimulus|response to other organism|plasma membrane|response to hormone|response to fungus|signal transduction|pollen tube|defense response|cellular response to chemical stimulus|negative regulation of signal transd…	-	-	-	-	chr1:38354847-38358940	0.688681744243275	4.69829779323382	4.51076595637519
107404385	LOC107404385	probable LRR receptor-like serine/threonine-protein kinase At1g05700	GO:0016020|GO:0005623|GO:0008152|GO:0003824|GO:0016740|GO:0044237|GO:0071944|GO:0044238|GO:0005886|GO:0019538|GO:0006793|GO:0016772|GO:0000166|GO:0016773|GO:0017076|GO:0016301|GO:0044267|GO:0006796|GO:0005524|GO:0006464|GO:0016310|GO:0004672|GO:0030554|GO:0006468	membrane|cell|metabolic process|catalytic activity|transferase activity|cellular metabolic process|cell periphery|primary metabolic process|plasma membrane|protein metabolic process|phosphorus metabolic process|transferase activity, transferring phosphorus-containing groups|nucleotide binding|phosphotransferase activity, alcohol group as acceptor|purine nucleotide binding|kinase activity|cellular…	-	-	-	-	NW_015453738.1:93643-98703	-5.71831554568716	-4.82633515273442	-0.431809985969794
107404457	LOC107404457	serine/threonine-protein kinase 10-like	GO:0005623|GO:0005622|GO:0005737	cell|intracellular|cytoplasm	-	-	-	-	NW_015453750.1:12073-14494	1.30172383975831	0.797490054512702	-0.838143732996258
107404820	LOC107404820	probable LRR receptor-like serine/threonine-protein kinase At1g05700	GO:0016020|GO:0005623|GO:0008152|GO:0003824|GO:0016740|GO:0044237|GO:0071944|GO:0044238|GO:0005886|GO:0019538|GO:0006793|GO:0016772|GO:0000166|GO:0016773|GO:0017076|GO:0016301|GO:0044267|GO:0006796|GO:0005524|GO:0006464|GO:0016310|GO:0004672|GO:0030554|GO:0006468	membrane|cell|metabolic process|catalytic activity|transferase activity|cellular metabolic process|cell periphery|primary metabolic process|plasma membrane|protein metabolic process|phosphorus metabolic process|transferase activity, transferring phosphorus-containing groups|nucleotide binding|phosphotransferase activity, alcohol group as acceptor|purine nucleotide binding|kinase activity|cellular…	-	-	-	-	NW_015453797.1:42004-49580	-3.49286451698228	-5.09668722773101	-0.457259046022766
107407086	LOC107407086	CBL-interacting serine/threonine-protein kinase 9-like	GO:0051179|GO:0016020|GO:0005623|GO:0005215|GO:0050896|GO:0008152|GO:0003824|GO:0016740|GO:0006950|GO:0005622|GO:0044237|GO:0071944|GO:0022857|GO:0044238|GO:0005886|GO:0005515|GO:0043231|GO:0019538|GO:0007584|GO:0006810|GO:0005737|GO:0022891|GO:0006793|GO:0055085|GO:0009415|GO:0009414|GO:0016772|GO:0000166|GO:0010118|GO:0016773|GO:0006811|GO:0015075|GO:0005829|GO:0017076|GO:0005634|GO:0034220|GO:…	localization|membrane|cell|transporter activity|response to stimulus|metabolic process|catalytic activity|transferase activity|response to stress|intracellular|cellular metabolic process|cell periphery|transmembrane transporter activity|primary metabolic process|plasma membrane|protein binding|intracellular membrane-bounded organelle|protein metabolic process|response to nutrient|transport|cytopl…	-	-	-	-	NW_015454503.1:9457-14197	4.61492088118643	6.77861597335478	5.06853958238664
107407707	LOC107407707	probable LRR receptor-like serine/threonine-protein kinase At4g37250	-	-	-	-	probable LRR receptor-like serine/threonine-protein kinase At1g05700	-	NW_015454908.1:9-3799	3.23908807831962	2.17611616855372	1.0577831288564
107409104	LOC107409104	probable serine/threonine-protein kinase At1g18390	GO:0016020|GO:0005623|GO:0030054|GO:0023052|GO:0004871|GO:0050896|GO:0008152|GO:0003824|GO:0016740|GO:0051716|GO:0044237|GO:0004872|GO:0009506|GO:0071944|GO:0005911|GO:0038023|GO:0044238|GO:0005886|GO:0005515|GO:0009725|GO:0004888|GO:0019899|GO:0007165|GO:0019538|GO:0070887|GO:0006793|GO:0001653|GO:0016772|GO:0007154|GO:0016773|GO:0019199|GO:0016301|GO:0007166|GO:0044267|GO:0006796|GO:0009755|GO:…	membrane|cell|cell junction|signaling|signal transducer activity|response to stimulus|metabolic process|catalytic activity|transferase activity|cellular response to stimulus|cellular metabolic process|receptor activity|plasmodesma|cell periphery|cell-cell junction|signaling receptor activity|primary metabolic process|plasma membrane|protein binding|response to hormone|transmembrane signaling rece…	-	-	-	-	NW_015456303.1:555-2836	-2.95641536576117	0.134925030524746	0.0135243856529432
107409859	LOC107409859	serine/threonine-protein phosphatase 4 regulatory subunit 2-like	GO:0005623|GO:0005622|GO:0043231|GO:0005634	cell|intracellular|intracellular membrane-bounded organelle|nucleus	-	-	-	-	NW_015457594.1:24-1333	3.29292349275267	2.62103267182755	1.16343376680287
107409932	LOC107409932	probable LRR receptor-like serine/threonine-protein kinase At1g07650	GO:0016020|GO:0005623|GO:0030054|GO:0023052|GO:0004871|GO:0050896|GO:0008152|GO:0003824|GO:0016740|GO:0051716|GO:0044237|GO:0004872|GO:0009506|GO:0071944|GO:0005911|GO:0038023|GO:0044238|GO:0005886|GO:0005515|GO:0009725|GO:0004888|GO:0019899|GO:0007165|GO:0019538|GO:0070887|GO:0006793|GO:0001653|GO:0016772|GO:0007154|GO:0016773|GO:0019199|GO:0016301|GO:0007166|GO:0044267|GO:0006796|GO:0009755|GO:…	membrane|cell|cell junction|signaling|signal transducer activity|response to stimulus|metabolic process|catalytic activity|transferase activity|cellular response to stimulus|cellular metabolic process|receptor activity|plasmodesma|cell periphery|cell-cell junction|signaling receptor activity|primary metabolic process|plasma membrane|protein binding|response to hormone|transmembrane signaling rece…	-	-	-	-	NW_015457684.1:864-1562	-2.59042847302899	1.25822385701758	5.05161374047059
107409998	LOC107409998	LRR receptor-like serine/threonine-protein kinase EFR	GO:0051179|GO:0016020|GO:0005623|GO:0023052|GO:0004871|GO:0050896|GO:0008152|GO:0003824|GO:0016740|GO:0006950|GO:0051716|GO:0044237|GO:0004872|GO:0071944|GO:0009607|GO:0051707|GO:0038023|GO:0044238|GO:0006955|GO:0005886|GO:0005515|GO:0004888|GO:0007165|GO:0008219|GO:0031349|GO:0019538|GO:0050776|GO:0006952|GO:0006810|GO:0006793|GO:0055085|GO:0009617|GO:0045087|GO:0016772|GO:0007154|GO:0000166|GO:…	localization|membrane|cell|signaling|signal transducer activity|response to stimulus|metabolic process|catalytic activity|transferase activity|response to stress|cellular response to stimulus|cellular metabolic process|receptor activity|cell periphery|response to biotic stimulus|response to other organism|signaling receptor activity|primary metabolic process|immune response|plasma membrane|protei…	-	-	-	-	chr2:326660-329049	-4.57960370708464	3.0037697642833	0.59856462749973
107410113	LOC107410113	probable LRR receptor-like serine/threonine-protein kinase At3g47570	GO:0016020|GO:0005623|GO:0023052|GO:0050896|GO:0008152|GO:0003824|GO:0016740|GO:0051716|GO:0044237|GO:0071944|GO:0044238|GO:0005886|GO:0007165|GO:0019538|GO:0006793|GO:0016772|GO:0007154|GO:0000166|GO:0016773|GO:0017076|GO:0016301|GO:0007166|GO:0044267|GO:0006796|GO:0005524|GO:0006464|GO:0016310|GO:0004672|GO:0030554|GO:0006468|GO:0004674|GO:0007169	membrane|cell|signaling|response to stimulus|metabolic process|catalytic activity|transferase activity|cellular response to stimulus|cellular metabolic process|cell periphery|primary metabolic process|plasma membrane|signal transduction|protein metabolic process|phosphorus metabolic process|transferase activity, transferring phosphorus-containing groups|cell communication|nucleotide binding|phosp…	-	-	-	-	chr2:333864-335586	-4.97243843871785	2.53646300133729	0.100242411664823
107411386	LOC107411386	serine/threonine-protein kinase RUNKEL	GO:0032502|GO:0016020|GO:0005623|GO:0030054|GO:0000003|GO:0003824|GO:0003006|GO:0016740|GO:0009653|GO:0005622|GO:0009506|GO:0071944|GO:0005911|GO:0051321|GO:0005886|GO:0005515|GO:0009791|GO:0048236|GO:0007275|GO:0007049|GO:0005737|GO:0048316|GO:0008092|GO:0032403|GO:0016772|GO:0009793|GO:0048869|GO:0005874|GO:0051301|GO:0007349|GO:0007017|GO:0000166|GO:0009574|GO:0010154|GO:0000910|GO:0017076|GO:…	developmental process|membrane|cell|cell junction|reproduction|catalytic activity|developmental process involved in reproduction|transferase activity|anatomical structure morphogenesis|intracellular|plasmodesma|cell periphery|cell-cell junction|meiotic cell cycle|plasma membrane|protein binding|post-embryonic development|plant-type spore development|multicellular organism development|cell cycle|c…	-	-	-	-	chr2:16192208-16198242	3.75532094475229	3.27284848071597	1.22502356627889
107412066	LOC107412066	probable LRR receptor-like serine/threonine-protein kinase RKF3	GO:0005576|GO:0016020|GO:0005623|GO:0023052|GO:0004871|GO:0050896|GO:0008152|GO:0003824|GO:0016740|GO:0051716|GO:0044237|GO:0071944|GO:0044238|GO:0005886|GO:0007165|GO:0019538|GO:0004702|GO:0006793|GO:0016772|GO:0007154|GO:0016773|GO:0016301|GO:0044267|GO:0006796|GO:0035556|GO:0006464|GO:0016310|GO:0004672|GO:0006468|GO:0004674|GO:0046777	extracellular region|membrane|cell|signaling|signal transducer activity|response to stimulus|metabolic process|catalytic activity|transferase activity|cellular response to stimulus|cellular metabolic process|cell periphery|primary metabolic process|plasma membrane|signal transduction|protein metabolic process|receptor signaling protein serine/threonine kinase activity|phosphorus metabolic process…	-	-	-	-	chr2:22542918-22544858	-2.16427256611915	1.18652780831435	-0.101200839825553
107412067	LOC107412067	probable LRR receptor-like serine/threonine-protein kinase RKF3	GO:0005576|GO:0016020|GO:0005623|GO:0023052|GO:0004871|GO:0050896|GO:0008152|GO:0003824|GO:0016740|GO:0051716|GO:0044237|GO:0071944|GO:0044238|GO:0005886|GO:0007165|GO:0019538|GO:0004702|GO:0006793|GO:0016772|GO:0007154|GO:0016773|GO:0016301|GO:0044267|GO:0006796|GO:0035556|GO:0006464|GO:0016310|GO:0004672|GO:0006468|GO:0004674|GO:0046777	extracellular region|membrane|cell|signaling|signal transducer activity|response to stimulus|metabolic process|catalytic activity|transferase activity|cellular response to stimulus|cellular metabolic process|cell periphery|primary metabolic process|plasma membrane|signal transduction|protein metabolic process|receptor signaling protein serine/threonine kinase activity|phosphorus metabolic process…	-	-	-	-	chr2:22545071-22547011	-2.09254532028624	0.913989587653366	-0.0340730620599443
107413332	LOC107413332	probable serine/threonine-protein kinase At1g18390	GO:0016020|GO:0005623|GO:0003824|GO:0016740|GO:0071944|GO:0005886|GO:0016772|GO:0000166|GO:0017076|GO:0016301|GO:0005524|GO:0030554	membrane|cell|catalytic activity|transferase activity|cell periphery|plasma membrane|transferase activity, transferring phosphorus-containing groups|nucleotide binding|purine nucleotide binding|kinase activity|ATP binding|adenyl nucleotide binding	-	-	-	-	chr3:7333831-7348246	1.13664697535164	1.71202373004442	3.14788048288679
107414127	LOC107414127	probable LRR receptor-like serine/threonine-protein kinase At4g08850	GO:0016020|GO:0005623|GO:0030054|GO:0003824|GO:0016740|GO:0031224|GO:0005622|GO:0009506|GO:0071944|GO:0005911|GO:0005886|GO:0043231|GO:0016021|GO:0016772|GO:0005634|GO:0016301	membrane|cell|cell junction|catalytic activity|transferase activity|intrinsic component of membrane|intracellular|plasmodesma|cell periphery|cell-cell junction|plasma membrane|intracellular membrane-bounded organelle|integral component of membrane|transferase activity, transferring phosphorus-containing groups|nucleus|kinase activity	-	-	-	-	chr3:19691307-19694936	-3.91091794799952	1.84399553479509	0.762206487294986
107414197	LOC107414197	probable LRR receptor-like serine/threonine-protein kinase At4g08850	GO:0016020|GO:0005623|GO:0030054|GO:0003824|GO:0016740|GO:0031224|GO:0005622|GO:0009506|GO:0071944|GO:0005911|GO:0005886|GO:0043231|GO:0016021|GO:0016772|GO:0005634|GO:0016301	membrane|cell|cell junction|catalytic activity|transferase activity|intrinsic component of membrane|intracellular|plasmodesma|cell periphery|cell-cell junction|plasma membrane|intracellular membrane-bounded organelle|integral component of membrane|transferase activity, transferring phosphorus-containing groups|nucleus|kinase activity	-	-	-	-	chr3:20399936-20402980	-0.422468056251571	0.365825175656581	1.88960468412014
107414199	LOC107414199	probable LRR receptor-like serine/threonine-protein kinase At4g08850	GO:0016020|GO:0005623|GO:0030054|GO:0003824|GO:0016740|GO:0031224|GO:0005622|GO:0009506|GO:0071944|GO:0005911|GO:0005886|GO:0043231|GO:0016021|GO:0016772|GO:0005634|GO:0016301	membrane|cell|cell junction|catalytic activity|transferase activity|intrinsic component of membrane|intracellular|plasmodesma|cell periphery|cell-cell junction|plasma membrane|intracellular membrane-bounded organelle|integral component of membrane|transferase activity, transferring phosphorus-containing groups|nucleus|kinase activity	-	-	-	-	chr3:20439946-20443017	-2.74053737382629	-1.18199527159762	0.767139449317768
107414200	LOC107414200	probable LRR receptor-like serine/threonine-protein kinase At4g08850	GO:0016020|GO:0005623|GO:0030054|GO:0003824|GO:0016740|GO:0031224|GO:0005622|GO:0009506|GO:0071944|GO:0005911|GO:0005886|GO:0043231|GO:0016021|GO:0016772|GO:0005634|GO:0016301	membrane|cell|cell junction|catalytic activity|transferase activity|intrinsic component of membrane|intracellular|plasmodesma|cell periphery|cell-cell junction|plasma membrane|intracellular membrane-bounded organelle|integral component of membrane|transferase activity, transferring phosphorus-containing groups|nucleus|kinase activity	-	-	-	-	chr3:20452266-20455707	-3.4028281627516	-2.00577167163006	1.52809432416798
107414234	LOC107414234	probable serine/threonine-protein kinase At1g18390	GO:0032502|GO:0005576|GO:0016020|GO:0005623|GO:0000003|GO:0050896|GO:0003824|GO:0003006|GO:0016740|GO:0006950|GO:0051716|GO:0048573|GO:0071944|GO:0005886|GO:0009725|GO:0010228|GO:0009791|GO:0007275|GO:0070887|GO:0009415|GO:0009414|GO:0009314|GO:0016772|GO:0007154|GO:0009737|GO:0016301|GO:0009416|GO:0042631|GO:0009648|GO:0071215	developmental process|extracellular region|membrane|cell|reproduction|response to stimulus|catalytic activity|developmental process involved in reproduction|transferase activity|response to stress|cellular response to stimulus|photoperiodism, flowering|cell periphery|plasma membrane|response to hormone|vegetative to reproductive phase transition of meristem|post-embryonic development|multicellula…	-	-	-	-	chr3:20744892-20746102	-0.967141067138996	0.0855513243540593	1.48810276356819
107414275	LOC107414275	probable LRR receptor-like serine/threonine-protein kinase At1g53440	GO:0016020|GO:0005623|GO:0008152|GO:0003824|GO:0016740|GO:0044237|GO:0071944|GO:0044238|GO:0005886|GO:0019538|GO:0006793|GO:0016772|GO:0016773|GO:0016301|GO:0044267|GO:0006796|GO:0006464|GO:0016310|GO:0004672|GO:0006468|GO:0004674|GO:0046777	membrane|cell|metabolic process|catalytic activity|transferase activity|cellular metabolic process|cell periphery|primary metabolic process|plasma membrane|protein metabolic process|phosphorus metabolic process|transferase activity, transferring phosphorus-containing groups|phosphotransferase activity, alcohol group as acceptor|kinase activity|cellular protein metabolic process|phosphate-containi…	-	-	-	-	chr3:21059026-21062741	2.47544595217576	1.65274082635866	5.32783778680016
107414618	LOC107414618	LRR receptor-like serine/threonine-protein kinase FLS2	GO:0016020|GO:0005623|GO:0030054|GO:0023052|GO:0004871|GO:0050896|GO:0008152|GO:0003824|GO:0016740|GO:0051716|GO:0044237|GO:0004872|GO:0009506|GO:0071944|GO:0005911|GO:0038023|GO:0044238|GO:0005886|GO:0005515|GO:0009725|GO:0004888|GO:0019899|GO:0007165|GO:0019538|GO:0070887|GO:0006793|GO:0001653|GO:0016772|GO:0007154|GO:0016773|GO:0019199|GO:0016301|GO:0007166|GO:0044267|GO:0006796|GO:0009755|GO:…	membrane|cell|cell junction|signaling|signal transducer activity|response to stimulus|metabolic process|catalytic activity|transferase activity|cellular response to stimulus|cellular metabolic process|receptor activity|plasmodesma|cell periphery|cell-cell junction|signaling receptor activity|primary metabolic process|plasma membrane|protein binding|response to hormone|transmembrane signaling rece…	-	-	-	-	chr3:24005210-24011414	-0.504474347669015	1.63833830020384	-0.0932525337713288
107414682	LOC107414682	probable serine/threonine protein kinase IRE	GO:0032502|GO:0005623|GO:0040007|GO:0023052|GO:0050896|GO:0008152|GO:0003824|GO:0016740|GO:0051716|GO:0009653|GO:0005622|GO:0044237|GO:0016049|GO:0044238|GO:0048589|GO:0060560|GO:0007165|GO:0043231|GO:0019538|GO:0009826|GO:0043169|GO:0006793|GO:0016772|GO:0048869|GO:0007154|GO:0000166|GO:0016773|GO:0017076|GO:0005634|GO:0016301|GO:0044267|GO:0006796|GO:0046872|GO:0035556|GO:0000902|GO:0005524|GO:…	developmental process|cell|growth|signaling|response to stimulus|metabolic process|catalytic activity|transferase activity|cellular response to stimulus|anatomical structure morphogenesis|intracellular|cellular metabolic process|cell growth|primary metabolic process|developmental growth|developmental growth involved in morphogenesis|signal transduction|intracellular membrane-bounded organelle|pro…	-	-	-	-	chr3:24687941-24698358	0.820800597513346	-0.209103677245087	-2.06172105342241
107415168	LOC107415168	probable LRR receptor-like serine/threonine-protein kinase At4g08850	GO:0016020|GO:0005623|GO:0030054|GO:0023052|GO:0004871|GO:0050896|GO:0008152|GO:0003824|GO:0016740|GO:0051716|GO:0044237|GO:0004872|GO:0009506|GO:0071944|GO:0005911|GO:0038023|GO:0044238|GO:0005886|GO:0005515|GO:0009725|GO:0004888|GO:0019899|GO:0007165|GO:0019538|GO:0070887|GO:0006793|GO:0001653|GO:0016772|GO:0007154|GO:0016773|GO:0019199|GO:0016301|GO:0007166|GO:0044267|GO:0006796|GO:0009755|GO:…	membrane|cell|cell junction|signaling|signal transducer activity|response to stimulus|metabolic process|catalytic activity|transferase activity|cellular response to stimulus|cellular metabolic process|receptor activity|plasmodesma|cell periphery|cell-cell junction|signaling receptor activity|primary metabolic process|plasma membrane|protein binding|response to hormone|transmembrane signaling rece…	-	-	-	-	chr4:1449108-1451766	-1.17087970700874	-3.1114381084106	1.16868908419604
107415342	LOC107415342	inactive LRR receptor-like serine/threonine-protein kinase BIR2	GO:0016020|GO:0005623|GO:0023052|GO:0050896|GO:0008152|GO:0003824|GO:0016740|GO:0051716|GO:0005622|GO:0044237|GO:0071944|GO:0044238|GO:0005886|GO:0007165|GO:0043231|GO:0019538|GO:0005737|GO:0006793|GO:0016772|GO:0007154|GO:0000166|GO:0016773|GO:0017076|GO:0016301|GO:0007166|GO:0044267|GO:0006796|GO:0009536|GO:0005524|GO:0006464|GO:0016310|GO:0004672|GO:0030554|GO:0009507|GO:0006468|GO:0004674|GO:…	membrane|cell|signaling|response to stimulus|metabolic process|catalytic activity|transferase activity|cellular response to stimulus|intracellular|cellular metabolic process|cell periphery|primary metabolic process|plasma membrane|signal transduction|intracellular membrane-bounded organelle|protein metabolic process|cytoplasm|phosphorus metabolic process|transferase activity, transferring phospho…	-	-	-	-	chr4:2651698-2653119	-2.97397012002876	0.537216821855177	-0.380788327170647
107415560	LOC107415560	probable LRR receptor-like serine/threonine-protein kinase At4g08850	GO:0016020|GO:0005623|GO:0030054|GO:0003824|GO:0016740|GO:0031224|GO:0005622|GO:0009506|GO:0071944|GO:0005911|GO:0005886|GO:0043231|GO:0016021|GO:0016772|GO:0005634|GO:0016301	membrane|cell|cell junction|catalytic activity|transferase activity|intrinsic component of membrane|intracellular|plasmodesma|cell periphery|cell-cell junction|plasma membrane|intracellular membrane-bounded organelle|integral component of membrane|transferase activity, transferring phosphorus-containing groups|nucleus|kinase activity	-	-	-	-	chr4:4554945-4556585	-1.1399657887831	0.345903848526526	1.38606122980927
107415741	LOC107415741	probable LRR receptor-like serine/threonine-protein kinase At4g08850	GO:0016020|GO:0005623|GO:0030054|GO:0023052|GO:0004871|GO:0050896|GO:0008152|GO:0003824|GO:0016740|GO:0051716|GO:0044237|GO:0004872|GO:0009506|GO:0071944|GO:0005911|GO:0038023|GO:0044238|GO:0005886|GO:0005515|GO:0009725|GO:0004888|GO:0019899|GO:0007165|GO:0019538|GO:0070887|GO:0006793|GO:0001653|GO:0016772|GO:0007154|GO:0016773|GO:0019199|GO:0016301|GO:0007166|GO:0044267|GO:0006796|GO:0009755|GO:…	membrane|cell|cell junction|signaling|signal transducer activity|response to stimulus|metabolic process|catalytic activity|transferase activity|cellular response to stimulus|cellular metabolic process|receptor activity|plasmodesma|cell periphery|cell-cell junction|signaling receptor activity|primary metabolic process|plasma membrane|protein binding|response to hormone|transmembrane signaling rece…	-	-	-	-	chr4:6568764-6570675	-1.54149087640019	2.12395980467073	0.075072534221382
107415770	LOC107415770	probable LRR receptor-like serine/threonine-protein kinase At4g08850	GO:0016020|GO:0005623|GO:0030054|GO:0023052|GO:0004871|GO:0050896|GO:0008152|GO:0003824|GO:0016740|GO:0051716|GO:0044237|GO:0004872|GO:0009506|GO:0071944|GO:0005911|GO:0038023|GO:0044238|GO:0005886|GO:0005515|GO:0009725|GO:0004888|GO:0019899|GO:0007165|GO:0019538|GO:0070887|GO:0006793|GO:0001653|GO:0016772|GO:0007154|GO:0016773|GO:0019199|GO:0016301|GO:0007166|GO:0044267|GO:0006796|GO:0009755|GO:…	membrane|cell|cell junction|signaling|signal transducer activity|response to stimulus|metabolic process|catalytic activity|transferase activity|cellular response to stimulus|cellular metabolic process|receptor activity|plasmodesma|cell periphery|cell-cell junction|signaling receptor activity|primary metabolic process|plasma membrane|protein binding|response to hormone|transmembrane signaling rece…	-	-	-	-	chr4:6593593-6596617	-2.97745474928616	-1.44607119965479	0.907722557646713
107415796	LOC107415796	serine/threonine-protein kinase SRK2A-like	GO:0005623|GO:0050896|GO:0006950|GO:0005622|GO:0009607|GO:0051707|GO:0043231|GO:0006952|GO:0005737|GO:0009617|GO:0005634|GO:0042742	cell|response to stimulus|response to stress|intracellular|response to biotic stimulus|response to other organism|intracellular membrane-bounded organelle|defense response|cytoplasm|response to bacterium|nucleus|defense response to bacterium	-	-	ko04075	Plant hormone signal transduction	chr4:6708881-6714450	5.48943031648983	5.20345455301004	3.37290440934933
107415969	LOC107415969	probable serine/threonine-protein kinase At1g18390	GO:0016020|GO:0005623|GO:0008152|GO:0003824|GO:0016740|GO:0044237|GO:0071944|GO:0044238|GO:0005886|GO:0019538|GO:0006793|GO:0016772|GO:0016773|GO:0016301|GO:0044267|GO:0006796|GO:0006464|GO:0016310|GO:0004672|GO:0006468|GO:0004674|GO:0046777	membrane|cell|metabolic process|catalytic activity|transferase activity|cellular metabolic process|cell periphery|primary metabolic process|plasma membrane|protein metabolic process|phosphorus metabolic process|transferase activity, transferring phosphorus-containing groups|phosphotransferase activity, alcohol group as acceptor|kinase activity|cellular protein metabolic process|phosphate-containi…	-	-	-	-	chr4:8527732-8547059	2.04127224521228	4.30950902378556	3.80117562554703
107416374	LOC107416374	probable LRR receptor-like serine/threonine-protein kinase At1g07650	GO:0016020|GO:0005623|GO:0008152|GO:0003824|GO:0016740|GO:0044237|GO:0071944|GO:0044238|GO:0005886|GO:0019538|GO:0006793|GO:0016772|GO:0016773|GO:0016301|GO:0044267|GO:0006796|GO:0006464|GO:0016310|GO:0004672|GO:0006468|GO:0004674|GO:0046777	membrane|cell|metabolic process|catalytic activity|transferase activity|cellular metabolic process|cell periphery|primary metabolic process|plasma membrane|protein metabolic process|phosphorus metabolic process|transferase activity, transferring phosphorus-containing groups|phosphotransferase activity, alcohol group as acceptor|kinase activity|cellular protein metabolic process|phosphate-containi…	-	-	-	-	chr4:13026246-13036548	0.954934082451367	1.57102961682889	4.34983639741364
107416766	LOC107416766	probable LRR receptor-like serine/threonine-protein kinase At4g26540	GO:0016020|GO:0005623|GO:0023052|GO:0050896|GO:0008152|GO:0003824|GO:0016740|GO:0051716|GO:0044237|GO:0071944|GO:0044238|GO:0005886|GO:0007165|GO:0019538|GO:0006793|GO:0016772|GO:0007154|GO:0000166|GO:0016773|GO:0017076|GO:0016301|GO:0007166|GO:0044267|GO:0006796|GO:0005524|GO:0006464|GO:0016310|GO:0004672|GO:0030554|GO:0006468|GO:0004674|GO:0007169	membrane|cell|signaling|response to stimulus|metabolic process|catalytic activity|transferase activity|cellular response to stimulus|cellular metabolic process|cell periphery|primary metabolic process|plasma membrane|signal transduction|protein metabolic process|phosphorus metabolic process|transferase activity, transferring phosphorus-containing groups|cell communication|nucleotide binding|phosp…	-	-	-	-	chr1:9108584-9112705	4.26920021286919	3.498531370981	1.74370163830343
107417000	LOC107417000	probable receptor-like serine/threonine-protein kinase At5g57670	GO:0005623|GO:0008152|GO:0003824|GO:0016740|GO:0005622|GO:0044237|GO:0044238|GO:0043231|GO:0019538|GO:0006793|GO:0016772|GO:0000166|GO:0017076|GO:0005634|GO:0016301|GO:0044267|GO:0006796|GO:0005524|GO:0006464|GO:0016310|GO:0030554|GO:0006468	cell|metabolic process|catalytic activity|transferase activity|intracellular|cellular metabolic process|primary metabolic process|intracellular membrane-bounded organelle|protein metabolic process|phosphorus metabolic process|transferase activity, transferring phosphorus-containing groups|nucleotide binding|purine nucleotide binding|nucleus|kinase activity|cellular protein metabolic process|phosp…	-	-	-	-	chr1:146415-149859	4.30313166696455	3.14352275174422	2.03589063936617
107417511	LOC107417511	probable LRR receptor-like serine/threonine-protein kinase At4g36180	GO:0016020|GO:0005623|GO:0030054|GO:0023052|GO:0050896|GO:0008152|GO:0003824|GO:0016740|GO:0051716|GO:0044237|GO:0009506|GO:0071944|GO:0005911|GO:0044238|GO:0005886|GO:0009725|GO:0007165|GO:0019538|GO:0070887|GO:0006793|GO:0016772|GO:0007154|GO:0016773|GO:0016301|GO:0044267|GO:0006796|GO:0009755|GO:0006464|GO:0016310|GO:0004672|GO:0006468|GO:0046777	membrane|cell|cell junction|signaling|response to stimulus|metabolic process|catalytic activity|transferase activity|cellular response to stimulus|cellular metabolic process|plasmodesma|cell periphery|cell-cell junction|primary metabolic process|plasma membrane|response to hormone|signal transduction|protein metabolic process|cellular response to chemical stimulus|phosphorus metabolic process|tra…	-	-	-	-	chr5:1501973-1503975	-0.906545628578343	1.4813187442203	2.12595281040565
107417694	LOC107417694	LRR receptor-like serine/threonine-protein kinase GSO2	GO:0005623|GO:0023052|GO:0050896|GO:0006950|GO:0051716|GO:0071944|GO:0009607|GO:0051707|GO:0009620|GO:0005618|GO:0007165|GO:0006952|GO:0007154|GO:0050832	cell|signaling|response to stimulus|response to stress|cellular response to stimulus|cell periphery|response to biotic stimulus|response to other organism|response to fungus|cell wall|signal transduction|defense response|cell communication|defense response to fungus	-	-	-	-	chr5:3502285-3505446	-0.104214573927142	3.12102537433551	0.991831153656506
107418569	LOC107418569	probable LRR receptor-like serine/threonine-protein kinase At3g47570	GO:0016020|GO:0005623|GO:0023052|GO:0050896|GO:0008152|GO:0003824|GO:0016740|GO:0051716|GO:0044237|GO:0071944|GO:0044238|GO:0005886|GO:0007165|GO:0019538|GO:0006793|GO:0016772|GO:0007154|GO:0000166|GO:0016773|GO:0017076|GO:0016301|GO:0007166|GO:0044267|GO:0006796|GO:0005524|GO:0006464|GO:0016310|GO:0004672|GO:0030554|GO:0006468|GO:0004674|GO:0007169	membrane|cell|signaling|response to stimulus|metabolic process|catalytic activity|transferase activity|cellular response to stimulus|cellular metabolic process|cell periphery|primary metabolic process|plasma membrane|signal transduction|protein metabolic process|phosphorus metabolic process|transferase activity, transferring phosphorus-containing groups|cell communication|nucleotide binding|phosp…	-	-	-	-	chr5:11995809-11999469	-0.594879180312361	0.721152478936746	3.33408064111031
107418610	LOC107418610	probable serine/threonine-protein kinase At1g18390	GO:0032502|GO:0005576|GO:0016020|GO:0005623|GO:0000003|GO:0050896|GO:0003824|GO:0003006|GO:0016740|GO:0006950|GO:0051716|GO:0048573|GO:0071944|GO:0005886|GO:0009725|GO:0010228|GO:0009791|GO:0007275|GO:0070887|GO:0009415|GO:0009414|GO:0009314|GO:0016772|GO:0007154|GO:0009737|GO:0016301|GO:0009416|GO:0042631|GO:0009648|GO:0071215	developmental process|extracellular region|membrane|cell|reproduction|response to stimulus|catalytic activity|developmental process involved in reproduction|transferase activity|response to stress|cellular response to stimulus|photoperiodism, flowering|cell periphery|plasma membrane|response to hormone|vegetative to reproductive phase transition of meristem|post-embryonic development|multicellula…	-	-	-	-	chr5:12421978-12428811	2.02636399700239	2.8593962098622	4.08881283156602
107418740	LOC107418740	probable serine/threonine-protein kinase At1g18390	GO:0032502|GO:0005576|GO:0016020|GO:0005623|GO:0000003|GO:0050896|GO:0003824|GO:0003006|GO:0016740|GO:0006950|GO:0051716|GO:0048573|GO:0071944|GO:0005886|GO:0009725|GO:0010228|GO:0009791|GO:0007275|GO:0070887|GO:0009415|GO:0009414|GO:0009314|GO:0016772|GO:0007154|GO:0009737|GO:0016301|GO:0009416|GO:0042631|GO:0009648|GO:0071215	developmental process|extracellular region|membrane|cell|reproduction|response to stimulus|catalytic activity|developmental process involved in reproduction|transferase activity|response to stress|cellular response to stimulus|photoperiodism, flowering|cell periphery|plasma membrane|response to hormone|vegetative to reproductive phase transition of meristem|post-embryonic development|multicellula…	-	-	-	-	chr5:14588831-14591679	0.408546932300465	1.20915689590005	3.14626061223882
107418929	LOC107418929	probable LRR receptor-like serine/threonine-protein kinase At1g56130	GO:0016020|GO:0005623|GO:0008152|GO:0003824|GO:0016740|GO:0044237|GO:0071944|GO:0044238|GO:0005886|GO:0019538|GO:0006793|GO:0016772|GO:0000166|GO:0016773|GO:0017076|GO:0016301|GO:0044267|GO:0006796|GO:0005524|GO:0006464|GO:0016310|GO:0004672|GO:0030554|GO:0006468|GO:0004674|GO:0046777	membrane|cell|metabolic process|catalytic activity|transferase activity|cellular metabolic process|cell periphery|primary metabolic process|plasma membrane|protein metabolic process|phosphorus metabolic process|transferase activity, transferring phosphorus-containing groups|nucleotide binding|phosphotransferase activity, alcohol group as acceptor|purine nucleotide binding|kinase activity|cellular…	-	-	-	-	chr1:11193932-11207203	2.74671843661583	2.89104889782712	4.86983937210081
107419854	LOC107419854	probable serine/threonine-protein kinase NAK	GO:0005623|GO:0003824|GO:0016740|GO:0005622|GO:0043231|GO:0005737|GO:0016772|GO:0016301|GO:0009536|GO:0009507	cell|catalytic activity|transferase activity|intracellular|intracellular membrane-bounded organelle|cytoplasm|transferase activity, transferring phosphorus-containing groups|kinase activity|plastid|chloroplast	-	-	-	-	chr6:363841-367244	1.0570233526411	4.33792199520791	3.96776098048973
107420401	LOC107420401	probable LRR receptor-like serine/threonine-protein kinase At4g36180	GO:0016020|GO:0005623|GO:0023052|GO:0050896|GO:0008152|GO:0003824|GO:0016740|GO:0051716|GO:0044237|GO:0071944|GO:0044238|GO:0005886|GO:0007165|GO:0019538|GO:0006793|GO:0016772|GO:0007154|GO:0000166|GO:0016773|GO:0017076|GO:0016301|GO:0007166|GO:0044267|GO:0006796|GO:0005524|GO:0006464|GO:0016310|GO:0004672|GO:0030554|GO:0006468|GO:0004674|GO:0007169	membrane|cell|signaling|response to stimulus|metabolic process|catalytic activity|transferase activity|cellular response to stimulus|cellular metabolic process|cell periphery|primary metabolic process|plasma membrane|signal transduction|protein metabolic process|phosphorus metabolic process|transferase activity, transferring phosphorus-containing groups|cell communication|nucleotide binding|phosp…	-	-	-	-	chr6:4866624-4870628	0.118217445691063	3.2500018376479	3.59611369827752
107420893	LOC107420893	serine/threonine-protein kinase Aurora-1	GO:0016020|GO:0005623|GO:0023052|GO:0050896|GO:0008152|GO:0003824|GO:0031090|GO:0016740|GO:0051716|GO:0005622|GO:0044237|GO:0012505|GO:0044238|GO:0043233|GO:0031965|GO:0007165|GO:0043231|GO:0019538|GO:0007049|GO:0005737|GO:0006793|GO:0016570|GO:0016772|GO:0007154|GO:0005874|GO:0051301|GO:0009966|GO:0005635|GO:0000166|GO:0016773|GO:0007067|GO:0016572|GO:0017076|GO:0000278|GO:0005634|GO:0031981|GO:…	membrane|cell|signaling|response to stimulus|metabolic process|catalytic activity|organelle membrane|transferase activity|cellular response to stimulus|intracellular|cellular metabolic process|endomembrane system|primary metabolic process|organelle lumen|nuclear membrane|signal transduction|intracellular membrane-bounded organelle|protein metabolic process|cell cycle|cytoplasm|phosphorus metaboli…	-	-	-	-	chr6:9950974-9953884	5.3590932649917	4.60871196130715	3.29420490708199
107421133	LOC107421133	G-type lectin S-receptor-like serine/threonine-protein kinase At1g34300	GO:0016020|GO:0005623|GO:0030054|GO:0023052|GO:0004871|GO:0050896|GO:0008152|GO:0003824|GO:0016740|GO:0051716|GO:0044237|GO:0004872|GO:0009506|GO:0071944|GO:0005911|GO:0038023|GO:0044238|GO:0005886|GO:0005515|GO:0009725|GO:0004888|GO:0019899|GO:0007165|GO:0019538|GO:0070887|GO:0006793|GO:0001653|GO:0016772|GO:0007154|GO:0016773|GO:0019199|GO:0016301|GO:0007166|GO:0044267|GO:0006796|GO:0009755|GO:…	membrane|cell|cell junction|signaling|signal transducer activity|response to stimulus|metabolic process|catalytic activity|transferase activity|cellular response to stimulus|cellular metabolic process|receptor activity|plasmodesma|cell periphery|cell-cell junction|signaling receptor activity|primary metabolic process|plasma membrane|protein binding|response to hormone|transmembrane signaling rece…	-	-	-	-	chr1:194584-196510	-1.55072645266264	1.27295034037884	0.498494646088745
107421178	LOC107421178	probable LRR receptor-like serine/threonine-protein kinase At1g56130	GO:0016020|GO:0005623|GO:0030054|GO:0023052|GO:0004871|GO:0050896|GO:0008152|GO:0003824|GO:0016740|GO:0051716|GO:0044237|GO:0004872|GO:0009506|GO:0071944|GO:0005911|GO:0038023|GO:0044238|GO:0005886|GO:0005515|GO:0009725|GO:0004888|GO:0019899|GO:0007165|GO:0019538|GO:0070887|GO:0006793|GO:0001653|GO:0016772|GO:0007154|GO:0016773|GO:0019199|GO:0016301|GO:0007166|GO:0044267|GO:0006796|GO:0009755|GO:…	membrane|cell|cell junction|signaling|signal transducer activity|response to stimulus|metabolic process|catalytic activity|transferase activity|cellular response to stimulus|cellular metabolic process|receptor activity|plasmodesma|cell periphery|cell-cell junction|signaling receptor activity|primary metabolic process|plasma membrane|protein binding|response to hormone|transmembrane signaling rece…	-	-	-	-	chr6:12996120-13003167	3.29547676680636	3.55516313592246	-0.086084259591492
107421353	LOC107421353	serine/threonine-protein kinase CTR1	GO:0032502|GO:0016020|GO:0005623|GO:0023052|GO:0050896|GO:0008152|GO:0003824|GO:0042175|GO:0031090|GO:0016740|GO:0006950|GO:0051716|GO:0005622|GO:0005789|GO:0044237|GO:0009058|GO:0050793|GO:0012505|GO:0044238|GO:0005515|GO:0009725|GO:0070482|GO:2000026|GO:0098588|GO:0009791|GO:0001666|GO:0007165|GO:0043231|GO:0044281|GO:0007275|GO:0048569|GO:0019538|GO:0051302|GO:0005737|GO:0070887|GO:0009968|GO:…	developmental process|membrane|cell|signaling|response to stimulus|metabolic process|catalytic activity|nuclear outer membrane-endoplasmic reticulum membrane network|organelle membrane|transferase activity|response to stress|cellular response to stimulus|intracellular|endoplasmic reticulum membrane|cellular metabolic process|biosynthetic process|regulation of developmental process|endomembrane sy…	-	-	-	-	chr6:17987048-17997735	5.91504303701842	5.97616405763304	3.5381365329066
107421572	LOC107421572	probable LRR receptor-like serine/threonine-protein kinase At1g34110	GO:0023052|GO:0050896|GO:0008152|GO:0003824|GO:0016740|GO:0051716|GO:0044237|GO:0044238|GO:0007165|GO:0019538|GO:0006793|GO:0016772|GO:0007154|GO:0000166|GO:0016773|GO:0017076|GO:0016301|GO:0007166|GO:0044267|GO:0006796|GO:0005524|GO:0006464|GO:0016310|GO:0004672|GO:0030554|GO:0006468|GO:0004674|GO:0007169	signaling|response to stimulus|metabolic process|catalytic activity|transferase activity|cellular response to stimulus|cellular metabolic process|primary metabolic process|signal transduction|protein metabolic process|phosphorus metabolic process|transferase activity, transferring phosphorus-containing groups|cell communication|nucleotide binding|phosphotransferase activity, alcohol group as acce…	-	-	-	-	chr6:22632437-22636779	2.87935986752366	2.18099988416703	-0.823220241251539
107421688	LOC107421688	G-type lectin S-receptor-like serine/threonine-protein kinase At1g61500	GO:0016020|GO:0005623|GO:0030054|GO:0050896|GO:0008152|GO:0003824|GO:0016740|GO:0006950|GO:0044237|GO:0009506|GO:0071944|GO:0005911|GO:0030246|GO:0044238|GO:0006955|GO:0005886|GO:0005515|GO:0019899|GO:0019538|GO:0006952|GO:0006793|GO:0045087|GO:0016772|GO:0016773|GO:0016301|GO:0044267|GO:0006796|GO:0031625|GO:0006464|GO:0016310|GO:0004672|GO:0006468|GO:0004674	membrane|cell|cell junction|response to stimulus|metabolic process|catalytic activity|transferase activity|response to stress|cellular metabolic process|plasmodesma|cell periphery|cell-cell junction|carbohydrate binding|primary metabolic process|immune response|plasma membrane|protein binding|enzyme binding|protein metabolic process|defense response|phosphorus metabolic process|innate immune resp…	-	-	-	-	chr1:16200817-16206327	-0.428857272931957	2.08602012435391	1.51482910237842
107421716	LOC107421716	G-type lectin S-receptor-like serine/threonine-protein kinase At1g61500	GO:0016020|GO:0005623|GO:0030054|GO:0050896|GO:0008152|GO:0003824|GO:0016740|GO:0006950|GO:0044237|GO:0009506|GO:0071944|GO:0005911|GO:0030246|GO:0044238|GO:0006955|GO:0005886|GO:0005515|GO:0019899|GO:0019538|GO:0006952|GO:0006793|GO:0045087|GO:0016772|GO:0016773|GO:0016301|GO:0044267|GO:0006796|GO:0031625|GO:0006464|GO:0016310|GO:0004672|GO:0006468|GO:0004674	membrane|cell|cell junction|response to stimulus|metabolic process|catalytic activity|transferase activity|response to stress|cellular metabolic process|plasmodesma|cell periphery|cell-cell junction|carbohydrate binding|primary metabolic process|immune response|plasma membrane|protein binding|enzyme binding|protein metabolic process|defense response|phosphorus metabolic process|innate immune resp…	-	-	-	-	chr1:16175956-16181866	2.09660017293866	4.16429063892972	4.40308523680503
107421727	LOC107421727	G-type lectin S-receptor-like serine/threonine-protein kinase RKS1	-	-	-	-	-	-	chr1:16035364-16039222	2.07797547280346	4.2072893907846	3.78232898622997
107421746	LOC107421746	G-type lectin S-receptor-like serine/threonine-protein kinase RKS1	GO:0016020|GO:0005623|GO:0030054|GO:0004871|GO:0050896|GO:0008152|GO:0003824|GO:0016740|GO:0031224|GO:0006950|GO:0005622|GO:0044237|GO:0004872|GO:0009506|GO:0071944|GO:0005911|GO:0038023|GO:0044238|GO:0005886|GO:0005515|GO:0004888|GO:0019899|GO:0043231|GO:0016021|GO:0019538|GO:0006952|GO:0005737|GO:0006793|GO:0016772|GO:0016773|GO:0019199|GO:0005773|GO:0016301|GO:0044267|GO:0006796|GO:0031625|GO:…	membrane|cell|cell junction|signal transducer activity|response to stimulus|metabolic process|catalytic activity|transferase activity|intrinsic component of membrane|response to stress|intracellular|cellular metabolic process|receptor activity|plasmodesma|cell periphery|cell-cell junction|signaling receptor activity|primary metabolic process|plasma membrane|protein binding|transmembrane signaling…	-	-	-	-	chr1:16088716-16092727	-1.06694209090205	1.76010786149681	0.94213325400562
107422079	LOC107422079	probable LRR receptor-like serine/threonine-protein kinase At4g08850	GO:0016020|GO:0005623|GO:0030054|GO:0003824|GO:0016740|GO:0031224|GO:0005622|GO:0009506|GO:0071944|GO:0005911|GO:0005886|GO:0043231|GO:0016021|GO:0016772|GO:0005634|GO:0016301	membrane|cell|cell junction|catalytic activity|transferase activity|intrinsic component of membrane|intracellular|plasmodesma|cell periphery|cell-cell junction|plasma membrane|intracellular membrane-bounded organelle|integral component of membrane|transferase activity, transferring phosphorus-containing groups|nucleus|kinase activity	-	-	-	-	chr7:6741774-6745316	-3.9613620296468	-0.729939333504575	0.899466302769266
107422643	LOC107422643	serine/threonine-protein kinase STY46-like	GO:0016020|GO:0005623|GO:0008152|GO:0003824|GO:0016740|GO:0005622|GO:0044237|GO:0071944|GO:0044238|GO:0005886|GO:0019538|GO:0005737|GO:0043177|GO:0006793|GO:0016772|GO:0000166|GO:0016773|GO:0005829|GO:0031406|GO:0017076|GO:0016301|GO:0044267|GO:0009657|GO:0006796|GO:0016597|GO:0005524|GO:0006464|GO:0009658|GO:0016310|GO:0004672|GO:0030554|GO:0006468|GO:0004674|GO:0004712	membrane|cell|metabolic process|catalytic activity|transferase activity|intracellular|cellular metabolic process|cell periphery|primary metabolic process|plasma membrane|protein metabolic process|cytoplasm|organic acid binding|phosphorus metabolic process|transferase activity, transferring phosphorus-containing groups|nucleotide binding|phosphotransferase activity, alcohol group as acceptor|cytos…	-	-	-	-	chr1:17322636-17331005	3.97599663107901	3.13619183802702	1.33091725156139
107422726	LOC107422726	probable LRR receptor-like serine/threonine-protein kinase At4g08850	GO:0016020|GO:0005623|GO:0030054|GO:0003824|GO:0016740|GO:0031224|GO:0005622|GO:0009506|GO:0071944|GO:0005911|GO:0005886|GO:0043231|GO:0016021|GO:0016772|GO:0005634|GO:0016301	membrane|cell|cell junction|catalytic activity|transferase activity|intrinsic component of membrane|intracellular|plasmodesma|cell periphery|cell-cell junction|plasma membrane|intracellular membrane-bounded organelle|integral component of membrane|transferase activity, transferring phosphorus-containing groups|nucleus|kinase activity	-	-	-	-	chr7:16281809-16285069	-5.98570993591496	-4.20549052684587	-1.67618381554918
107422978	LOC107422978	serine/threonine-protein kinase BLUS1	GO:0016020|GO:0005623|GO:0023052|GO:0050896|GO:0008152|GO:0003824|GO:0016740|GO:0006950|GO:0051716|GO:0005622|GO:0044237|GO:0071944|GO:0044238|GO:0005886|GO:0007165|GO:0008219|GO:0043085|GO:0019538|GO:0023014|GO:0007049|GO:0005737|GO:0051726|GO:0050790|GO:0006793|GO:0016772|GO:0007154|GO:0016773|GO:0007346|GO:0005829|GO:0051246|GO:0000278|GO:0016301|GO:0044267|GO:0006796|GO:0032270|GO:0031098|GO:…	membrane|cell|signaling|response to stimulus|metabolic process|catalytic activity|transferase activity|response to stress|cellular response to stimulus|intracellular|cellular metabolic process|cell periphery|primary metabolic process|plasma membrane|signal transduction|cell death|positive regulation of catalytic activity|protein metabolic process|signal transduction by protein phosphorylation|cel…	-	-	-	-	chr7:19734266-19736709	-4.02687487167905	-3.4092445026209	2.55545112453445
107423074	LOC107423074	probable serine/threonine-protein kinase kinX	GO:0005623|GO:0005622|GO:0043231|GO:0005634	cell|intracellular|intracellular membrane-bounded organelle|nucleus	-	-	-	-	chr7:21298105-21301492	-1.02916654949932	0.166968350707189	2.07033428217358
107423861	LOC107423861	CBL-interacting serine/threonine-protein kinase 9-like	GO:0051179|GO:0016020|GO:0005623|GO:0005215|GO:0050896|GO:0008152|GO:0003824|GO:0016740|GO:0006950|GO:0005622|GO:0044237|GO:0071944|GO:0022857|GO:0044238|GO:0005886|GO:0005515|GO:0043231|GO:0019538|GO:0007584|GO:0006810|GO:0005737|GO:0022891|GO:0006793|GO:0055085|GO:0009415|GO:0009414|GO:0016772|GO:0000166|GO:0010118|GO:0016773|GO:0006811|GO:0015075|GO:0005829|GO:0017076|GO:0005634|GO:0034220|GO:…	localization|membrane|cell|transporter activity|response to stimulus|metabolic process|catalytic activity|transferase activity|response to stress|intracellular|cellular metabolic process|cell periphery|transmembrane transporter activity|primary metabolic process|plasma membrane|protein binding|intracellular membrane-bounded organelle|protein metabolic process|response to nutrient|transport|cytopl…	-	-	-	-	chr8:1987268-1992006	4.54522412361041	6.66102559138868	5.06210706676101
107423984	LOC107423984	LRR receptor-like serine/threonine-protein kinase GSO2	GO:0005623|GO:0023052|GO:0050896|GO:0006950|GO:0051716|GO:0071944|GO:0009607|GO:0051707|GO:0009620|GO:0005618|GO:0007165|GO:0006952|GO:0007154|GO:0050832	cell|signaling|response to stimulus|response to stress|cellular response to stimulus|cell periphery|response to biotic stimulus|response to other organism|response to fungus|cell wall|signal transduction|defense response|cell communication|defense response to fungus	-	-	-	-	chr8:3013256-3016914	1.09524257291872	3.83892149957105	2.12997178703413
107424157	LOC107424157	probable serine/threonine-protein kinase gdt4	GO:0008152|GO:0003824|GO:0016740|GO:0044237|GO:0044238|GO:0019538|GO:0006793|GO:0016772|GO:0000166|GO:0016773|GO:0017076|GO:0016301|GO:0044267|GO:0006796|GO:0005524|GO:0006464|GO:0016310|GO:0004672|GO:0030554|GO:0006468|GO:0004712	metabolic process|catalytic activity|transferase activity|cellular metabolic process|primary metabolic process|protein metabolic process|phosphorus metabolic process|transferase activity, transferring phosphorus-containing groups|nucleotide binding|phosphotransferase activity, alcohol group as acceptor|purine nucleotide binding|kinase activity|cellular protein metabolic process|phosphate-containi…	-	-	-	-	chr8:4345015-4347591	2.8767959185178	2.1065929560146	0.112266726104781
107426575	LOC107426575	G-type lectin S-receptor-like serine/threonine-protein kinase At1g67520	GO:0016020|GO:0005623|GO:0050896|GO:0003824|GO:0016740|GO:0006950|GO:0071944|GO:0009607|GO:0051707|GO:0030246|GO:0006955|GO:0005886|GO:0005515|GO:0019899|GO:0009620|GO:0006952|GO:0045087|GO:0016772|GO:0016301|GO:0031625	membrane|cell|response to stimulus|catalytic activity|transferase activity|response to stress|cell periphery|response to biotic stimulus|response to other organism|carbohydrate binding|immune response|plasma membrane|protein binding|enzyme binding|response to fungus|defense response|innate immune response|transferase activity, transferring phosphorus-containing groups|kinase activity|ubiquitin pr…	-	-	-	-	chr9:6586798-6590323	-2.15454365177415	1.53071353357148	3.69193864744418
107428798	LOC107428798	probable LRR receptor-like serine/threonine-protein kinase At4g08850	GO:0016020|GO:0005623|GO:0030054|GO:0003824|GO:0016740|GO:0031224|GO:0005622|GO:0009506|GO:0071944|GO:0005911|GO:0005886|GO:0043231|GO:0016021|GO:0016772|GO:0005634|GO:0016301	membrane|cell|cell junction|catalytic activity|transferase activity|intrinsic component of membrane|intracellular|plasmodesma|cell periphery|cell-cell junction|plasma membrane|intracellular membrane-bounded organelle|integral component of membrane|transferase activity, transferring phosphorus-containing groups|nucleus|kinase activity	-	-	-	-	chr10:7927810-7932528	-3.86709224101096	-2.81075620557789	2.14473565583392
107428825	LOC107428825	serine/threonine-protein kinase BIK1-like	GO:0016020|GO:0005623|GO:0050896|GO:0008152|GO:0003824|GO:0044419|GO:0016740|GO:0006950|GO:0005622|GO:0044237|GO:0071944|GO:0009607|GO:0051707|GO:0044238|GO:0006955|GO:0005886|GO:0043233|GO:0009620|GO:0043231|GO:0031349|GO:0019538|GO:0050776|GO:0006952|GO:0005737|GO:0051701|GO:0006793|GO:0045087|GO:0044403|GO:0016772|GO:0005634|GO:0031347|GO:0031981|GO:0016301|GO:0044267|GO:0045088|GO:0006796|GO:…	membrane|cell|response to stimulus|metabolic process|catalytic activity|interspecies interaction between organisms|transferase activity|response to stress|intracellular|cellular metabolic process|cell periphery|response to biotic stimulus|response to other organism|primary metabolic process|immune response|plasma membrane|organelle lumen|response to fungus|intracellular membrane-bounded organelle…	-	-	ko04064	NF-kappa B signaling pathway	chr10:8647698-8649165	-2.53796105375146	2.21444097900208	1.80972538902786
107428837	LOC107428837	probable LRR receptor-like serine/threonine-protein kinase At1g14390	GO:0016020|GO:0005623|GO:0023052|GO:0050896|GO:0008152|GO:0003824|GO:0016740|GO:0051716|GO:0044237|GO:0071944|GO:0044238|GO:0005886|GO:0007165|GO:0019538|GO:0006793|GO:0016772|GO:0007154|GO:0000166|GO:0016773|GO:0017076|GO:0016301|GO:0007166|GO:0044267|GO:0006796|GO:0005524|GO:0006464|GO:0016310|GO:0004672|GO:0030554|GO:0006468|GO:0004674|GO:0007169	membrane|cell|signaling|response to stimulus|metabolic process|catalytic activity|transferase activity|cellular response to stimulus|cellular metabolic process|cell periphery|primary metabolic process|plasma membrane|signal transduction|protein metabolic process|phosphorus metabolic process|transferase activity, transferring phosphorus-containing groups|cell communication|nucleotide binding|phosp…	-	-	-	-	chr10:9187072-9214460	4.8455520113552	4.73764298115571	2.41184987503979
107428913	LOC107428913	receptor-like serine/threonine-protein kinase SD1-8	GO:0016020|GO:0005623|GO:0030054|GO:0023052|GO:0004871|GO:0050896|GO:0008152|GO:0003824|GO:0016740|GO:0006950|GO:0051716|GO:0044237|GO:0004872|GO:0009506|GO:0071944|GO:0005911|GO:0038023|GO:0044238|GO:0005886|GO:0005515|GO:0009725|GO:0004888|GO:0019899|GO:0007165|GO:0019538|GO:0006952|GO:0070887|GO:0006793|GO:0001653|GO:0016772|GO:0007154|GO:0016773|GO:0019199|GO:0016301|GO:0007166|GO:0044267|GO:…	membrane|cell|cell junction|signaling|signal transducer activity|response to stimulus|metabolic process|catalytic activity|transferase activity|response to stress|cellular response to stimulus|cellular metabolic process|receptor activity|plasmodesma|cell periphery|cell-cell junction|signaling receptor activity|primary metabolic process|plasma membrane|protein binding|response to hormone|transmemb…	-	-	-	-	chr1:30945043-30948108	-3.31388719250711	0.223799228300665	-1.59689037309553
107429217	LOC107429217	probable serine/threonine-protein kinase cdc7	GO:0005623|GO:0008152|GO:0003824|GO:0016740|GO:0005622|GO:0044237|GO:0044238|GO:0043231|GO:0019538|GO:0006793|GO:0016772|GO:0000166|GO:0016773|GO:0017076|GO:0005634|GO:0016301|GO:0044267|GO:0006796|GO:0005524|GO:0006464|GO:0016310|GO:0004672|GO:0030554|GO:0006468|GO:0004674|GO:0046777	cell|metabolic process|catalytic activity|transferase activity|intracellular|cellular metabolic process|primary metabolic process|intracellular membrane-bounded organelle|protein metabolic process|phosphorus metabolic process|transferase activity, transferring phosphorus-containing groups|nucleotide binding|phosphotransferase activity, alcohol group as acceptor|purine nucleotide binding|nucleus|k…	-	-	ko04110|ko04111|ko04113	Cell cycle|Cell cycle - yeast|Meiosis - yeast	chr10:16090633-16096551	1.34113435047465	0.582357209108279	-1.1871994422019
107430690	LOC107430690	G-type lectin S-receptor-like serine/threonine-protein kinase At4g27290	GO:0016020|GO:0005623|GO:0030054|GO:0050896|GO:0008152|GO:0003824|GO:0016740|GO:0006950|GO:0044237|GO:0009506|GO:0071944|GO:0005911|GO:0044238|GO:0005886|GO:0019538|GO:0006952|GO:0006793|GO:0016772|GO:0016773|GO:0016301|GO:0044267|GO:0006796|GO:0006464|GO:0016310|GO:0004672|GO:0006468|GO:0004674	membrane|cell|cell junction|response to stimulus|metabolic process|catalytic activity|transferase activity|response to stress|cellular metabolic process|plasmodesma|cell periphery|cell-cell junction|primary metabolic process|plasma membrane|protein metabolic process|defense response|phosphorus metabolic process|transferase activity, transferring phosphorus-containing groups|phosphotransferase act…	-	-	-	-	chr1:32230782-32241051	-0.719383515955486	2.02365259379409	1.81372866368213
107430772	LOC107430772	G-type lectin S-receptor-like serine/threonine-protein kinase At4g27290	GO:0016020|GO:0005623|GO:0030054|GO:0050896|GO:0008152|GO:0003824|GO:0016740|GO:0006950|GO:0044237|GO:0009506|GO:0071944|GO:0005911|GO:0044238|GO:0005886|GO:0019538|GO:0006952|GO:0006793|GO:0016772|GO:0016773|GO:0016301|GO:0044267|GO:0006796|GO:0006464|GO:0016310|GO:0004672|GO:0006468|GO:0004674	membrane|cell|cell junction|response to stimulus|metabolic process|catalytic activity|transferase activity|response to stress|cellular metabolic process|plasmodesma|cell periphery|cell-cell junction|primary metabolic process|plasma membrane|protein metabolic process|defense response|phosphorus metabolic process|transferase activity, transferring phosphorus-containing groups|phosphotransferase act…	-	-	-	-	chr1:32031103-32034447	-1.45919674782045	2.54650625740875	1.04379752651581
107430860	LOC107430860	probable LRR receptor-like serine/threonine-protein kinase At4g08850	GO:0016020|GO:0005623|GO:0030054|GO:0003824|GO:0016740|GO:0031224|GO:0005622|GO:0009506|GO:0071944|GO:0005911|GO:0005886|GO:0043231|GO:0016021|GO:0016772|GO:0005634|GO:0016301	membrane|cell|cell junction|catalytic activity|transferase activity|intrinsic component of membrane|intracellular|plasmodesma|cell periphery|cell-cell junction|plasma membrane|intracellular membrane-bounded organelle|integral component of membrane|transferase activity, transferring phosphorus-containing groups|nucleus|kinase activity	-	-	-	-	chr11:13656114-13657271	0.834191776421234	2.41780254276002	3.43275225458904
107430885	LOC107430885	probable LRR receptor-like serine/threonine-protein kinase At4g08850	GO:0016020|GO:0005623|GO:0030054|GO:0003824|GO:0016740|GO:0031224|GO:0005622|GO:0009506|GO:0071944|GO:0005911|GO:0005886|GO:0043231|GO:0016021|GO:0016772|GO:0005634|GO:0016301	membrane|cell|cell junction|catalytic activity|transferase activity|intrinsic component of membrane|intracellular|plasmodesma|cell periphery|cell-cell junction|plasma membrane|intracellular membrane-bounded organelle|integral component of membrane|transferase activity, transferring phosphorus-containing groups|nucleus|kinase activity	-	-	-	-	chr11:13643652-13645133	2.85028980451566	3.36609207940159	5.53030276488576
107430893	LOC107430893	G-type lectin S-receptor-like serine/threonine-protein kinase At4g27290	-	-	-	-	-	-	chr1:32501854-32505556	0.0451090978144507	3.40982362109193	1.77662686807966
107431383	LOC107431383	probable LRR receptor-like serine/threonine-protein kinase At1g06840	GO:0016020|GO:0005623|GO:0023052|GO:0050896|GO:0008152|GO:0003824|GO:0016740|GO:0051716|GO:0005622|GO:0044237|GO:0071944|GO:0044238|GO:0005886|GO:0007165|GO:0043231|GO:0019538|GO:0005737|GO:0006793|GO:0016772|GO:0007154|GO:0000166|GO:0016773|GO:0017076|GO:0016301|GO:0007166|GO:0044267|GO:0006796|GO:0009536|GO:0005524|GO:0006464|GO:0016310|GO:0004672|GO:0030554|GO:0009507|GO:0006468|GO:0004674|GO:…	membrane|cell|signaling|response to stimulus|metabolic process|catalytic activity|transferase activity|cellular response to stimulus|intracellular|cellular metabolic process|cell periphery|primary metabolic process|plasma membrane|signal transduction|intracellular membrane-bounded organelle|protein metabolic process|cytoplasm|phosphorus metabolic process|transferase activity, transferring phospho…	-	-	-	-	chr11:18614743-18620973	5.404457735627	4.74646576766688	0.966054696432829
107431384	LOC107431384	probable LRR receptor-like serine/threonine-protein kinase At1g06840	GO:0016020|GO:0005623|GO:0023052|GO:0050896|GO:0008152|GO:0003824|GO:0016740|GO:0051716|GO:0005622|GO:0044237|GO:0071944|GO:0044238|GO:0005886|GO:0007165|GO:0043231|GO:0019538|GO:0005737|GO:0006793|GO:0016772|GO:0007154|GO:0000166|GO:0016773|GO:0017076|GO:0016301|GO:0007166|GO:0044267|GO:0006796|GO:0009536|GO:0005524|GO:0006464|GO:0016310|GO:0004672|GO:0030554|GO:0009507|GO:0006468|GO:0004674|GO:…	membrane|cell|signaling|response to stimulus|metabolic process|catalytic activity|transferase activity|cellular response to stimulus|intracellular|cellular metabolic process|cell periphery|primary metabolic process|plasma membrane|signal transduction|intracellular membrane-bounded organelle|protein metabolic process|cytoplasm|phosphorus metabolic process|transferase activity, transferring phospho…	-	-	-	-	chr11:18624559-18631587	1.16582429830604	3.61211474382372	-0.385111952981138
107431409	LOC107431409	probable LRR receptor-like serine/threonine-protein kinase At1g06840	GO:0016020|GO:0005623|GO:0023052|GO:0050896|GO:0008152|GO:0003824|GO:0016740|GO:0051716|GO:0005622|GO:0044237|GO:0071944|GO:0044238|GO:0005886|GO:0007165|GO:0043231|GO:0019538|GO:0005737|GO:0006793|GO:0016772|GO:0007154|GO:0000166|GO:0016773|GO:0017076|GO:0016301|GO:0007166|GO:0044267|GO:0006796|GO:0009536|GO:0005524|GO:0006464|GO:0016310|GO:0004672|GO:0030554|GO:0009507|GO:0006468|GO:0004674|GO:…	membrane|cell|signaling|response to stimulus|metabolic process|catalytic activity|transferase activity|cellular response to stimulus|intracellular|cellular metabolic process|cell periphery|primary metabolic process|plasma membrane|signal transduction|intracellular membrane-bounded organelle|protein metabolic process|cytoplasm|phosphorus metabolic process|transferase activity, transferring phospho…	-	-	-	-	chr11:18632638-18639130	5.08614655566225	4.93949109842	1.73457153789302
107432588	LOC107432588	probable LRR receptor-like serine/threonine-protein kinase At1g53430	-	-	-	-	-	-	chr12:8828797-8841202	-1.75065414805928	1.56362904354708	1.20613447092846
107432589	LOC107432589	probable LRR receptor-like serine/threonine-protein kinase At1g53430	GO:0016020|GO:0005623|GO:0008152|GO:0003824|GO:0016740|GO:0044237|GO:0071944|GO:0044238|GO:0005886|GO:0019538|GO:0006793|GO:0016772|GO:0016773|GO:0016301|GO:0044267|GO:0006796|GO:0006464|GO:0016310|GO:0004672|GO:0006468|GO:0004674|GO:0046777	membrane|cell|metabolic process|catalytic activity|transferase activity|cellular metabolic process|cell periphery|primary metabolic process|plasma membrane|protein metabolic process|phosphorus metabolic process|transferase activity, transferring phosphorus-containing groups|phosphotransferase activity, alcohol group as acceptor|kinase activity|cellular protein metabolic process|phosphate-containi…	-	-	-	-	chr12:8849294-8853918	2.39499476336973	5.10926318399948	4.79685128091379
107432605	LOC107432605	probable LRR receptor-like serine/threonine-protein kinase At1g53430	GO:0016020|GO:0005623|GO:0008152|GO:0003824|GO:0016740|GO:0044237|GO:0071944|GO:0044238|GO:0005886|GO:0019538|GO:0006793|GO:0016772|GO:0016773|GO:0016301|GO:0044267|GO:0006796|GO:0006464|GO:0016310|GO:0004672|GO:0006468|GO:0004674|GO:0046777	membrane|cell|metabolic process|catalytic activity|transferase activity|cellular metabolic process|cell periphery|primary metabolic process|plasma membrane|protein metabolic process|phosphorus metabolic process|transferase activity, transferring phosphorus-containing groups|phosphotransferase activity, alcohol group as acceptor|kinase activity|cellular protein metabolic process|phosphate-containi…	-	-	-	-	chr12:8777538-8794287	2.43215134384918	3.35868602315693	6.12337523077566
107433412	LOC107433412	probable LRR receptor-like serine/threonine-protein kinase At4g08850	GO:0016020|GO:0023052|GO:0050896|GO:0006950|GO:0051716|GO:0007165|GO:0006952|GO:0007154	membrane|signaling|response to stimulus|response to stress|cellular response to stimulus|signal transduction|defense response|cell communication	-	-	-	-	chr1:35515051-35516422	3.93613218240306	8.0551126081739	7.40442917362638
107433510	LOC107433510	LRR receptor-like serine/threonine-protein kinase ERL1	GO:0016020|GO:0005623|GO:0030054|GO:0023052|GO:0004871|GO:0050896|GO:0008152|GO:0003824|GO:0016740|GO:0051716|GO:0044237|GO:0004872|GO:0009506|GO:0071944|GO:0005911|GO:0038023|GO:0044238|GO:0005886|GO:0005515|GO:0009725|GO:0004888|GO:0019899|GO:0007165|GO:0019538|GO:0070887|GO:0006793|GO:0001653|GO:0016772|GO:0007154|GO:0016773|GO:0019199|GO:0016301|GO:0007166|GO:0044267|GO:0006796|GO:0009755|GO:…	membrane|cell|cell junction|signaling|signal transducer activity|response to stimulus|metabolic process|catalytic activity|transferase activity|cellular response to stimulus|cellular metabolic process|receptor activity|plasmodesma|cell periphery|cell-cell junction|signaling receptor activity|primary metabolic process|plasma membrane|protein binding|response to hormone|transmembrane signaling rece…	-	-	-	-	NW_015453404.1:208728-212257	-1.61501243905682	2.69465695338075	0.349092733127335
107433512	LOC107433512	LRR receptor-like serine/threonine-protein kinase FLS2	GO:0005623|GO:0023052|GO:0050896|GO:0006950|GO:0051716|GO:0071944|GO:0009607|GO:0051707|GO:0009620|GO:0005618|GO:0007165|GO:0006952|GO:0007154|GO:0050832	cell|signaling|response to stimulus|response to stress|cellular response to stimulus|cell periphery|response to biotic stimulus|response to other organism|response to fungus|cell wall|signal transduction|defense response|cell communication|defense response to fungus	-	-	-	-	NW_015453404.1:296345-300225	-2.21192146663527	1.93683956883938	-3.5632511706854
107434237	LOC107434237	probable LRR receptor-like serine/threonine-protein kinase At4g08850	GO:0016020|GO:0005623|GO:0030054|GO:0023052|GO:0004871|GO:0050896|GO:0008152|GO:0003824|GO:0016740|GO:0051716|GO:0044237|GO:0004872|GO:0009506|GO:0071944|GO:0005911|GO:0038023|GO:0044238|GO:0005886|GO:0005515|GO:0009725|GO:0004888|GO:0019899|GO:0007165|GO:0019538|GO:0070887|GO:0006793|GO:0001653|GO:0016772|GO:0007154|GO:0016773|GO:0019199|GO:0016301|GO:0007166|GO:0044267|GO:0006796|GO:0009755|GO:…	membrane|cell|cell junction|signaling|signal transducer activity|response to stimulus|metabolic process|catalytic activity|transferase activity|cellular response to stimulus|cellular metabolic process|receptor activity|plasmodesma|cell periphery|cell-cell junction|signaling receptor activity|primary metabolic process|plasma membrane|protein binding|response to hormone|transmembrane signaling rece…	-	-	-	-	NW_015453438.1:78746-83504	2.13092841098383	3.95922114918389	4.27966081182927
107434247	LOC107434247	probable LRR receptor-like serine/threonine-protein kinase At4g08850	GO:0016020|GO:0005623|GO:0030054|GO:0023052|GO:0004871|GO:0050896|GO:0008152|GO:0003824|GO:0016740|GO:0051716|GO:0044237|GO:0004872|GO:0009506|GO:0071944|GO:0005911|GO:0038023|GO:0044238|GO:0005886|GO:0005515|GO:0009725|GO:0004888|GO:0019899|GO:0007165|GO:0019538|GO:0070887|GO:0006793|GO:0001653|GO:0016772|GO:0007154|GO:0016773|GO:0019199|GO:0016301|GO:0007166|GO:0044267|GO:0006796|GO:0009755|GO:…	membrane|cell|cell junction|signaling|signal transducer activity|response to stimulus|metabolic process|catalytic activity|transferase activity|cellular response to stimulus|cellular metabolic process|receptor activity|plasmodesma|cell periphery|cell-cell junction|signaling receptor activity|primary metabolic process|plasma membrane|protein binding|response to hormone|transmembrane signaling rece…	-	-	-	-	NW_015453438.1:64808-69006	2.02488451810658	4.13601931625437	3.58986300881696
107434683	LOC107434683	G-type lectin S-receptor-like serine/threonine-protein kinase RLK1	GO:0016020|GO:0005623|GO:0030054|GO:0023052|GO:0004871|GO:0050896|GO:0008152|GO:0003824|GO:0016740|GO:0051716|GO:0044237|GO:0004872|GO:0009506|GO:0071944|GO:0005911|GO:0038023|GO:0044238|GO:0005886|GO:0005515|GO:0009725|GO:0004888|GO:0019899|GO:0007165|GO:0019538|GO:0070887|GO:0006793|GO:0001653|GO:0016772|GO:0007154|GO:0016773|GO:0019199|GO:0016301|GO:0007166|GO:0044267|GO:0006796|GO:0009755|GO:…	membrane|cell|cell junction|signaling|signal transducer activity|response to stimulus|metabolic process|catalytic activity|transferase activity|cellular response to stimulus|cellular metabolic process|receptor activity|plasmodesma|cell periphery|cell-cell junction|signaling receptor activity|primary metabolic process|plasma membrane|protein binding|response to hormone|transmembrane signaling rece…	-	-	-	-	NW_015453472.1:189401-191994	-3.4763698161337	-0.0369587849976398	0.714988041623513
107434867	LOC107434867	serine/threonine-protein kinase-like protein ACR4	GO:0032502|GO:0016020|GO:0005623|GO:0000003|GO:0004871|GO:0003824|GO:0003006|GO:0009986|GO:0016740|GO:0009653|GO:0005622|GO:0004872|GO:0071944|GO:0038023|GO:0005886|GO:0005515|GO:0004888|GO:0009791|GO:0043231|GO:0007275|GO:0048569|GO:0051302|GO:0005737|GO:0042802|GO:0010015|GO:0046983|GO:0048316|GO:0009886|GO:0031982|GO:0048829|GO:0010311|GO:0048364|GO:0048513|GO:0016772|GO:0009793|GO:0051301|GO:…	developmental process|membrane|cell|reproduction|signal transducer activity|catalytic activity|developmental process involved in reproduction|cell surface|transferase activity|anatomical structure morphogenesis|intracellular|receptor activity|cell periphery|signaling receptor activity|plasma membrane|protein binding|transmembrane signaling receptor activity|post-embryonic development|intracellula…	-	-	-	-	NW_015453484.1:18920-22877	-0.87872362425475	-1.67355240329741	-4.71318986329906
107435710	LOC107435710	G-type lectin S-receptor-like serine/threonine-protein kinase RLK1	GO:0016020|GO:0005623|GO:0030054|GO:0023052|GO:0004871|GO:0050896|GO:0008152|GO:0003824|GO:0016740|GO:0051716|GO:0044237|GO:0004872|GO:0009506|GO:0071944|GO:0005911|GO:0038023|GO:0044238|GO:0005886|GO:0005515|GO:0009725|GO:0004888|GO:0019899|GO:0007165|GO:0019538|GO:0070887|GO:0006793|GO:0001653|GO:0016772|GO:0007154|GO:0016773|GO:0019199|GO:0016301|GO:0007166|GO:0044267|GO:0006796|GO:0009755|GO:…	membrane|cell|cell junction|signaling|signal transducer activity|response to stimulus|metabolic process|catalytic activity|transferase activity|cellular response to stimulus|cellular metabolic process|receptor activity|plasmodesma|cell periphery|cell-cell junction|signaling receptor activity|primary metabolic process|plasma membrane|protein binding|response to hormone|transmembrane signaling rece…	-	-	-	-	NW_015453559.1:92379-94718	1.10577604417189	3.74388940116468	3.01481312455239

## Sheet: HSP
Gene_ID	Gene_name	Description	GO_id	GO_term	KO_ID	KO_Description	kegg_id	kegg_term	locus	log2(0 h)	log2(1 h)	log2(12 h)
107404752	LOC107404752	small heat shock protein, chloroplastic-like	GO:0005623|GO:0050896|GO:0006950|GO:0005622|GO:0009408|GO:0043231|GO:0009266|GO:0006979|GO:0005737|GO:0009314|GO:0009416|GO:0042542|GO:0009536|GO:0000302|GO:0009642|GO:0009507|GO:0009644	cell|response to stimulus|response to stress|intracellular|response to heat|intracellular membrane-bounded organelle|response to temperature stimulus|response to oxidative stress|cytoplasm|response to radiation|response to light stimulus|response to hydrogen peroxide|plastid|response to reactive oxygen species|response to light intensity|chloroplast|response to high light intensity	-	-	ko04141	Protein processing in endoplasmic reticulum	NW_015453787.1:17541-18524	1.19099483130258	2.28691214931458	3.91221612352701
107405906	LOC107405906	heat shock cognate 70 kDa protein-like	GO:0016020|GO:0005623|GO:0050896|GO:0006457|GO:0006950|GO:0005622|GO:0071944|GO:0009607|GO:0051707|GO:0005886|GO:0009615|GO:0009408|GO:0005618|GO:0043231|GO:0009266|GO:0005737|GO:0000166|GO:0005829|GO:0017076|GO:0009536|GO:0005524|GO:0030554|GO:0009507	membrane|cell|response to stimulus|protein folding|response to stress|intracellular|cell periphery|response to biotic stimulus|response to other organism|plasma membrane|response to virus|response to heat|cell wall|intracellular membrane-bounded organelle|response to temperature stimulus|cytoplasm|nucleotide binding|cytosol|purine nucleotide binding|plastid|ATP binding|adenyl nucleotide binding|c…	-	-	ko03040|ko04141|ko04144|ko04010|ko04213	Spliceosome|Protein processing in endoplasmic reticulum|Endocytosis|MAPK signaling pathway|Longevity regulating pathway - multiple species	chr1:40123468-40125896	-3.72974743119151	2.01860747439785	5.60655352928775
107406481	LOC107406481	heat shock 70 kDa protein-like	GO:0016020|GO:0005623|GO:0050896|GO:0006457|GO:0006950|GO:0005622|GO:0071944|GO:0009607|GO:0051707|GO:0005886|GO:0009615|GO:0009408|GO:0005618|GO:0043231|GO:0009266|GO:0005737|GO:0000166|GO:0005829|GO:0017076|GO:0009536|GO:0005524|GO:0030554|GO:0009507	membrane|cell|response to stimulus|protein folding|response to stress|intracellular|cell periphery|response to biotic stimulus|response to other organism|plasma membrane|response to virus|response to heat|cell wall|intracellular membrane-bounded organelle|response to temperature stimulus|cytoplasm|nucleotide binding|cytosol|purine nucleotide binding|plastid|ATP binding|adenyl nucleotide binding|c…	-	-	ko03040|ko04141|ko04144|ko04010|ko04213	Spliceosome|Protein processing in endoplasmic reticulum|Endocytosis|MAPK signaling pathway|Longevity regulating pathway - multiple species	chr1:40127705-40130207	-1.86283083741596	1.86792680962287	5.8887603051932
107406957	LOC107406957	chaperone protein DnaJ	GO:0005623|GO:0006457|GO:0005622|GO:0005737	cell|protein folding|intracellular|cytoplasm	-	-	-	-	NW_015454443.1:12265-14651	2.86206325675423	2.69778698351674	5.53367297746254
107407995	LOC107407995	26.5 kDa heat shock protein, mitochondrial	GO:0005623|GO:0050896|GO:0006950|GO:0005622|GO:0009408|GO:0043231|GO:0009266|GO:0006979|GO:0005737|GO:0009314|GO:0009416|GO:0042542|GO:0005739|GO:0009536|GO:0000302|GO:0009642|GO:0009507|GO:0009644	cell|response to stimulus|response to stress|intracellular|response to heat|intracellular membrane-bounded organelle|response to temperature stimulus|response to oxidative stress|cytoplasm|response to radiation|response to light stimulus|response to hydrogen peroxide|mitochondrion|plastid|response to reactive oxygen species|response to light intensity|chloroplast|response to high light intensity	-	-	ko04141	Protein processing in endoplasmic reticulum	chr1:41451014-41452258	-0.0605461421656723	3.77695903200284	3.50863446297279
107410909	LOC107410909	18.5 kDa class I heat shock protein-like	-	-	-	-	-	-	chr2:7121464-7122048	-2.54910161174723	-3.41544760638088	6.05115571727106
107410914	LOC107410914	18.5 kDa class I heat shock protein-like	GO:0005623|GO:0050896|GO:0006950|GO:0005622|GO:0009408|GO:0009266|GO:0006979|GO:0005737	cell|response to stimulus|response to stress|intracellular|response to heat|response to temperature stimulus|response to oxidative stress|cytoplasm	-	-	ko04141	Protein processing in endoplasmic reticulum	chr2:7101485-7102356	-1.80275875529119	-0.631997250569506	4.88335026153783
107410915	LOC107410915	18.5 kDa class I heat shock protein-like	GO:0005623|GO:0050896|GO:0006950|GO:0005622|GO:0009408|GO:0009266|GO:0006979|GO:0005737	cell|response to stimulus|response to stress|intracellular|response to heat|response to temperature stimulus|response to oxidative stress|cytoplasm	-	-	ko04141	Protein processing in endoplasmic reticulum	chr2:7094788-7095723	-3.93942407125233	#NUM!	5.10285395508042
107410916	LOC107410916	18.5 kDa class I heat shock protein-like	GO:0005623|GO:0050896|GO:0006950|GO:0005622|GO:0009408|GO:0009266|GO:0006979|GO:0005737	cell|response to stimulus|response to stress|intracellular|response to heat|response to temperature stimulus|response to oxidative stress|cytoplasm	-	-	ko04141	Protein processing in endoplasmic reticulum	chr2:7096753-7097601	0.0286027093196727	0.387980725107305	2.64432831049951
107410934	LOC107410934	18.5 kDa class I heat shock protein-like	GO:0005623|GO:0050896|GO:0006950|GO:0005622|GO:0009408|GO:0009266|GO:0005737	cell|response to stimulus|response to stress|intracellular|response to heat|response to temperature stimulus|cytoplasm	-	-	ko04141	Protein processing in endoplasmic reticulum	chr2:8015361-8016243	1.65519732546115	1.9143021699951	5.26971459831652
107410936	LOC107410936	18.5 kDa class I heat shock protein-like	GO:0005623|GO:0050896|GO:0006950|GO:0005622|GO:0009408|GO:0009266|GO:0006979|GO:0005737|GO:0009314|GO:0009416|GO:0042542|GO:0000302|GO:0009642|GO:0009644	cell|response to stimulus|response to stress|intracellular|response to heat|response to temperature stimulus|response to oxidative stress|cytoplasm|response to radiation|response to light stimulus|response to hydrogen peroxide|response to reactive oxygen species|response to light intensity|response to high light intensity	-	-	ko04141	Protein processing in endoplasmic reticulum	chr2:7621978-7622834	4.50732174590915	4.02466817611228	7.05170938302369
107410940	LOC107410940	18.5 kDa class I heat shock protein-like	GO:0005623|GO:0050896|GO:0006950|GO:0005622|GO:0009408|GO:0009266|GO:0005737	cell|response to stimulus|response to stress|intracellular|response to heat|response to temperature stimulus|cytoplasm	-	-	ko04141	Protein processing in endoplasmic reticulum	chr2:7949744-7950529	2.02452045072505	1.57759988931875	5.68537362166307
107410942	LOC107410942	18.5 kDa class I heat shock protein-like	GO:0005623|GO:0050896|GO:0006950|GO:0005622|GO:0009408|GO:0009266|GO:0005737	cell|response to stimulus|response to stress|intracellular|response to heat|response to temperature stimulus|cytoplasm	-	-	ko04141	Protein processing in endoplasmic reticulum	chr2:7954026-7954700	2.28349684940551	2.27152544617647	6.3263576727773
107410945	LOC107410945	18.5 kDa class I heat shock protein-like	GO:0005623|GO:0050896|GO:0006950|GO:0005622|GO:0009408|GO:0009266|GO:0005737	cell|response to stimulus|response to stress|intracellular|response to heat|response to temperature stimulus|cytoplasm	-	-	ko04141	Protein processing in endoplasmic reticulum	chr2:7977281-7977958	0.690090330509397	-0.437389015013456	3.94533651678051
107410947	LOC107410947	18.5 kDa class I heat shock protein-like	GO:0005623|GO:0050896|GO:0006950|GO:0005622|GO:0009408|GO:0009266|GO:0005737	cell|response to stimulus|response to stress|intracellular|response to heat|response to temperature stimulus|cytoplasm	-	-	ko04141	Protein processing in endoplasmic reticulum	chr2:7963984-7964737	-0.291364043706268	-1.1201329369702	3.83686539681193
107410963	LOC107410963	18.5 kDa class I heat shock protein	GO:0005623|GO:0050896|GO:0006950|GO:0005622|GO:0009408|GO:0009266|GO:0005737	cell|response to stimulus|response to stress|intracellular|response to heat|response to temperature stimulus|cytoplasm	-	-	ko04141	Protein processing in endoplasmic reticulum	chr2:7995805-8009065	-0.478878049042739	-1.22280863406077	4.95178054789737
107410965	LOC107410965	18.5 kDa class I heat shock protein-like	GO:0005623|GO:0050896|GO:0006950|GO:0005622|GO:0009408|GO:0009266|GO:0005737	cell|response to stimulus|response to stress|intracellular|response to heat|response to temperature stimulus|cytoplasm	-	-	ko04141	Protein processing in endoplasmic reticulum	chr2:8005277-8006051	0.504092258723849	-0.174641875696487	4.56580790639179
107411076	LOC107411076	heat shock cognate 70 kDa protein-like	GO:0032502|GO:0005576|GO:0016020|GO:0005623|GO:0030054|GO:0050896|GO:0008152|GO:0031090|GO:0006457|GO:0006950|GO:0005622|GO:0044237|GO:0009506|GO:0071944|GO:0009607|GO:0005911|GO:0009058|GO:0006807|GO:0050793|GO:0051707|GO:0012505|GO:0044238|GO:0005886|GO:0043233|GO:0048046|GO:0005515|GO:0009615|GO:2000026|GO:0019899|GO:0098588|GO:0009408|GO:0009620|GO:0005618|GO:0009791|GO:0043231|GO:0009266|GO:…	developmental process|extracellular region|membrane|cell|cell junction|response to stimulus|metabolic process|organelle membrane|protein folding|response to stress|intracellular|cellular metabolic process|plasmodesma|cell periphery|response to biotic stimulus|cell-cell junction|biosynthetic process|nitrogen compound metabolic process|regulation of developmental process|response to other organism|…	-	-	ko03040|ko04141|ko04144|ko04010|ko04213	Spliceosome|Protein processing in endoplasmic reticulum|Endocytosis|MAPK signaling pathway|Longevity regulating pathway - multiple species	chr2:9486170-9489224	3.52286968679908	4.27477934933366	7.17925294794706
107413527	LOC107413527	heat shock cognate 70 kDa protein 2-like	GO:0032502|GO:0005576|GO:0016020|GO:0005623|GO:0030054|GO:0050896|GO:0008152|GO:0031090|GO:0006457|GO:0006950|GO:0005622|GO:0044237|GO:0009506|GO:0071944|GO:0009607|GO:0005911|GO:0009058|GO:0006807|GO:0050793|GO:0051707|GO:0012505|GO:0044238|GO:0005886|GO:0043233|GO:0048046|GO:0005515|GO:0009615|GO:2000026|GO:0019899|GO:0098588|GO:0009408|GO:0009620|GO:0005618|GO:0009791|GO:0043231|GO:0009266|GO:…	developmental process|extracellular region|membrane|cell|cell junction|response to stimulus|metabolic process|organelle membrane|protein folding|response to stress|intracellular|cellular metabolic process|plasmodesma|cell periphery|response to biotic stimulus|cell-cell junction|biosynthetic process|nitrogen compound metabolic process|regulation of developmental process|response to other organism|…	-	-	ko03040|ko04141|ko04144|ko04010|ko04213	Spliceosome|Protein processing in endoplasmic reticulum|Endocytosis|MAPK signaling pathway|Longevity regulating pathway - multiple species	chr3:9028820-9031390	6.30019353570742	7.80458449413065	8.77751930852206
107413804	LOC107413804	18.1 kDa class I heat shock protein-like	GO:0005623|GO:0050896|GO:0006950|GO:0005622|GO:0009408|GO:0009266|GO:0005737	cell|response to stimulus|response to stress|intracellular|response to heat|response to temperature stimulus|cytoplasm	-	-	ko04141	Protein processing in endoplasmic reticulum	chr3:14764670-14765770	-1.15594489268436	-0.54962118425488	2.02886213537857
107413815	LOC107413815	17.8 kDa class I heat shock protein-like	GO:0005623|GO:0050896|GO:0006950|GO:0005622|GO:0009408|GO:0009266|GO:0005737	cell|response to stimulus|response to stress|intracellular|response to heat|response to temperature stimulus|cytoplasm	-	-	ko04141	Protein processing in endoplasmic reticulum	chr3:15350982-15351833	3.20483014069941	2.95234830708111	6.04403120009125
107414211	LOC107414211	heat shock 22 kDa protein, mitochondrial-like	GO:0005623|GO:0050896|GO:0006950|GO:0005622|GO:0009408|GO:0043231|GO:0009266|GO:0005737|GO:0005739	cell|response to stimulus|response to stress|intracellular|response to heat|intracellular membrane-bounded organelle|response to temperature stimulus|cytoplasm|mitochondrion	-	-	ko04141	Protein processing in endoplasmic reticulum	chr3:20621542-20622804	0.751415926820122	0.591975725398003	4.29835755630593
107414306	LOC107414306	heat shock 22 kDa protein, mitochondrial-like	GO:0005623|GO:0050896|GO:0006950|GO:0005622|GO:0009408|GO:0043231|GO:0009266|GO:0005737|GO:0005739	cell|response to stimulus|response to stress|intracellular|response to heat|intracellular membrane-bounded organelle|response to temperature stimulus|cytoplasm|mitochondrion	-	-	ko04141	Protein processing in endoplasmic reticulum	chr3:21313172-21314548	1.00530588833586	1.02268103942227	4.58941294864571
107414931	LOC107414931	small heat shock protein, chloroplastic-like	GO:0005623|GO:0050896|GO:0006950|GO:0005622|GO:0009408|GO:0043231|GO:0009266|GO:0006979|GO:0005737|GO:0009314|GO:0009416|GO:0042542|GO:0009536|GO:0000302|GO:0009642|GO:0009507|GO:0009644	cell|response to stimulus|response to stress|intracellular|response to heat|intracellular membrane-bounded organelle|response to temperature stimulus|response to oxidative stress|cytoplasm|response to radiation|response to light stimulus|response to hydrogen peroxide|plastid|response to reactive oxygen species|response to light intensity|chloroplast|response to high light intensity	-	-	ko04141	Protein processing in endoplasmic reticulum	chr3:26151473-26153089	1.67190027642899	2.18167265640007	3.70820022116534
107415246	LOC107415246	class I heat shock protein-like	GO:0050896|GO:0006950|GO:0009408|GO:0009266	response to stimulus|response to stress|response to heat|response to temperature stimulus	-	-	ko04141	Protein processing in endoplasmic reticulum	chr4:1683620-1684294	-3.46780304623115	-1.62189848237817	5.5080182104323
107415252	LOC107415252	small heat shock protein, chloroplastic-like	GO:0005623|GO:0050896|GO:0006950|GO:0005622|GO:0009408|GO:0043231|GO:0009266|GO:0006979|GO:0005737|GO:0009314|GO:0009416|GO:0042542|GO:0009536|GO:0000302|GO:0009642|GO:0009507|GO:0009644	cell|response to stimulus|response to stress|intracellular|response to heat|intracellular membrane-bounded organelle|response to temperature stimulus|response to oxidative stress|cytoplasm|response to radiation|response to light stimulus|response to hydrogen peroxide|plastid|response to reactive oxygen species|response to light intensity|chloroplast|response to high light intensity	-	-	ko04141	Protein processing in endoplasmic reticulum	chr4:1580835-1582372	-3.15323484095584	0.309820848370892	-0.0488765375268607
107420051	LOC107420051	heat shock factor protein HSF30	GO:0005623|GO:0050896|GO:0008152|GO:0003700|GO:0006950|GO:0051716|GO:0005622|GO:0044237|GO:0009058|GO:0006807|GO:0044238|GO:0005515|GO:0070482|GO:0009408|GO:0001666|GO:0043231|GO:0009266|GO:0006979|GO:0003676|GO:0006139|GO:0006725|GO:0005737|GO:0070887|GO:0009314|GO:0034605|GO:0019438|GO:0010467|GO:0005634|GO:0003677|GO:0009416|GO:0010286|GO:0010468|GO:0042542|GO:0010628|GO:0071456|GO:0010200|GO:…	cell|response to stimulus|metabolic process|transcription factor activity, sequence-specific DNA binding|response to stress|cellular response to stimulus|intracellular|cellular metabolic process|biosynthetic process|nitrogen compound metabolic process|primary metabolic process|protein binding|response to oxygen levels|response to heat|response to hypoxia|intracellular membrane-bounded organelle|r…	-	-	-	-	chr6:2770941-2773569	-1.17648814812735	-1.80877218197168	3.17783462560871
107420074	LOC107420074	17.1 kDa class II heat shock protein-like	GO:0005623|GO:0050896|GO:0006950|GO:0005622|GO:0009408|GO:0009266|GO:0005737	cell|response to stimulus|response to stress|intracellular|response to heat|response to temperature stimulus|cytoplasm	-	-	ko04141	Protein processing in endoplasmic reticulum	chr6:2544369-2545473	-3.46663945490951	#NUM!	5.00553932162048
107420159	LOC107420159	17.9 kDa class II heat shock protein	GO:0005623|GO:0050896|GO:0006950|GO:0005622|GO:0009408|GO:0009266|GO:0005737	cell|response to stimulus|response to stress|intracellular|response to heat|response to temperature stimulus|cytoplasm	-	-	ko04141	Protein processing in endoplasmic reticulum	chr6:2546545-2547451	2.95828579682842	3.07507124348688	5.89083405119729
107423466	LOC107423466	chaperone protein dnaJ 10	GO:0005623|GO:0006457|GO:0005622|GO:0005737	cell|protein folding|intracellular|cytoplasm	-	-	-	-	chr7:25597996-25601549	3.09883717527007	3.04429321633382	1.06575976989338
107424261	LOC107424261	22.0 kDa class IV heat shock protein	GO:0005623|GO:0050896|GO:0006950|GO:0005622|GO:0012505|GO:0009408|GO:0043231|GO:0009266|GO:0005737|GO:0005783|GO:0009536|GO:0009507	cell|response to stimulus|response to stress|intracellular|endomembrane system|response to heat|intracellular membrane-bounded organelle|response to temperature stimulus|cytoplasm|endoplasmic reticulum|plastid|chloroplast	-	-	ko04141	Protein processing in endoplasmic reticulum	chr8:5431286-5432204	0.429895692218659	-0.200325958091423	4.54049772734559
107425440	LOC107425440	chaperone protein dnaJ 20, chloroplastic-like	GO:0005623|GO:0005622|GO:0043231|GO:0005737|GO:0009536|GO:0009507	cell|intracellular|intracellular membrane-bounded organelle|cytoplasm|plastid|chloroplast	-	-	-	-	chr8:15881746-15882323	-3.24398503250806	2.69641980186505	2.08135410477287
107426626	LOC107426626	heat shock 70 kDa protein	GO:0016020|GO:0005623|GO:0050896|GO:0006457|GO:0006950|GO:0005622|GO:0071944|GO:0009607|GO:0051707|GO:0005886|GO:0009615|GO:0009408|GO:0005618|GO:0043231|GO:0009266|GO:0005737|GO:0000166|GO:0005829|GO:0017076|GO:0009536|GO:0005524|GO:0030554|GO:0009507	membrane|cell|response to stimulus|protein folding|response to stress|intracellular|cell periphery|response to biotic stimulus|response to other organism|plasma membrane|response to virus|response to heat|cell wall|intracellular membrane-bounded organelle|response to temperature stimulus|cytoplasm|nucleotide binding|cytosol|purine nucleotide binding|plastid|ATP binding|adenyl nucleotide binding|c…	-	-	ko03040|ko04141|ko04144|ko04010|ko04213	Spliceosome|Protein processing in endoplasmic reticulum|Endocytosis|MAPK signaling pathway|Longevity regulating pathway - multiple species	chr1:26731209-26733985	-2.54078257104456	-1.01096519612138	2.04935903786417
107428481	LOC107428481	small heat shock protein, chloroplastic-like	GO:0005623|GO:0050896|GO:0006950|GO:0005622|GO:0009408|GO:0043231|GO:0009266|GO:0006979|GO:0005737|GO:0009314|GO:0009416|GO:0042542|GO:0009536|GO:0000302|GO:0009642|GO:0009507|GO:0009644	cell|response to stimulus|response to stress|intracellular|response to heat|intracellular membrane-bounded organelle|response to temperature stimulus|response to oxidative stress|cytoplasm|response to radiation|response to light stimulus|response to hydrogen peroxide|plastid|response to reactive oxygen species|response to light intensity|chloroplast|response to high light intensity	-	-	ko04141	Protein processing in endoplasmic reticulum	chr10:4057676-4059027	-0.815252679441978	-1.16302094427201	6.92270758437295
107429312	LOC107429312	dnaJ homolog subfamily B member 8-like	GO:0005623|GO:0006457|GO:0005622|GO:0005737	cell|protein folding|intracellular|cytoplasm	-	-	-	-	chr10:17398617-17399807	-3.55287513245054	#NUM!	1.91682795021795
107429319	LOC107429319	dnaJ homolog subfamily B member 6	GO:0005623|GO:0006457|GO:0005622|GO:0043231|GO:0005737|GO:0005634	cell|protein folding|intracellular|intracellular membrane-bounded organelle|cytoplasm|nucleus	-	-	-	-	chr10:17439815-17443987	-2.7590949860618	-4.70293505572255	2.66539164624464
107430166	LOC107430166	heat shock protein 82	GO:0005515	protein binding	-	-	ko04141|ko04626|ko04151|ko04914	Protein processing in endoplasmic reticulum|Plant-pathogen interaction|PI3K-Akt signaling pathway|Progesterone-mediated oocyte maturation	chr11:3941210-3950934	0.653032965795787	-0.581557990895136	5.785723634344
107430207	LOC107430207	heat shock protein 83	GO:0005576|GO:0016020|GO:0005623|GO:0031090|GO:0006457|GO:0005622|GO:0071944|GO:0012505|GO:0005886|GO:0048046|GO:0005515|GO:0098588|GO:0005618|GO:0043231|GO:0005737|GO:0051082|GO:0005774|GO:0005794|GO:0000166|GO:0005829|GO:0017076|GO:0005634|GO:0005773|GO:0009532|GO:0009536|GO:0005524|GO:0009570|GO:0030554|GO:0009507	extracellular region|membrane|cell|organelle membrane|protein folding|intracellular|cell periphery|endomembrane system|plasma membrane|apoplast|protein binding|bounding membrane of organelle|cell wall|intracellular membrane-bounded organelle|cytoplasm|unfolded protein binding|vacuolar membrane|Golgi apparatus|nucleotide binding|cytosol|purine nucleotide binding|nucleus|vacuole|plastid stroma|plas…	-	-	ko04141|ko04626|ko04151|ko04914	Protein processing in endoplasmic reticulum|Plant-pathogen interaction|PI3K-Akt signaling pathway|Progesterone-mediated oocyte maturation	chr11:3951992-3955067	-0.460563098379671	-0.70639477885688	5.22340414504529
107432410	LOC107432410	chaperone protein dnaJ 6	GO:0005623|GO:0006457|GO:0005622|GO:0005737	cell|protein folding|intracellular|cytoplasm	-	-	-	-	chr12:7341758-7345841	3.22705803055253	2.67812368463065	0.805377858204571

## Sheet: CRK
Gene_ID	Gene_name	Description	GO_id	GO_term	KO_ID	KO_Description	kegg_id	kegg_term	locus	log2(0 h)	log2(1 h)	log2(12 h)
107405595	LOC107405595	cysteine-rich receptor-like protein kinase 25	GO:0005576|GO:0016020|GO:0005623|GO:0030054|GO:0050896|GO:0008152|GO:0003824|GO:0016740|GO:0006950|GO:0044237|GO:0009506|GO:0071944|GO:0005911|GO:0044238|GO:0005886|GO:0005515|GO:0019899|GO:0019538|GO:0006952|GO:0006793|GO:0016772|GO:0016773|GO:0016301|GO:0044267|GO:0006796|GO:0031625|GO:0006464|GO:0016310|GO:0004672|GO:0006468|GO:0004674	extracellular region|membrane|cell|cell junction|response to stimulus|metabolic process|catalytic activity|transferase activity|response to stress|cellular metabolic process|plasmodesma|cell periphery|cell-cell junction|primary metabolic process|plasma membrane|protein binding|enzyme binding|protein metabolic process|defense response|phosphorus metabolic process|transferase activity, transferring…	-	-	-	-	NW_015453967.1:36633-39690	-5.35045486289239	-4.21680085386319	0.337313958164487
107405596	LOC107405596	cysteine-rich receptor-like protein kinase 29	GO:0005576|GO:0016020|GO:0005623|GO:0030054|GO:0050896|GO:0008152|GO:0003824|GO:0016740|GO:0006950|GO:0051716|GO:0044237|GO:0009506|GO:0071944|GO:0009607|GO:0005911|GO:0051707|GO:0044238|GO:0006955|GO:0005886|GO:0005515|GO:0019899|GO:0008219|GO:0019538|GO:0006952|GO:0006793|GO:0009617|GO:0045087|GO:0016772|GO:0016773|GO:0002237|GO:0009626|GO:0016301|GO:0044267|GO:0006796|GO:0012501|GO:0042742|GO:…	extracellular region|membrane|cell|cell junction|response to stimulus|metabolic process|catalytic activity|transferase activity|response to stress|cellular response to stimulus|cellular metabolic process|plasmodesma|cell periphery|response to biotic stimulus|cell-cell junction|response to other organism|primary metabolic process|immune response|plasma membrane|protein binding|enzyme binding|cell …	-	-	-	-	NW_015453967.1:25128-27014	-2.16484882259047	0.723847824226696	-1.18067446179662
107405707	LOC107405707	cysteine-rich receptor-like protein kinase 25	GO:0005576|GO:0016020|GO:0005623|GO:0030054|GO:0050896|GO:0008152|GO:0003824|GO:0016740|GO:0006950|GO:0044237|GO:0009506|GO:0071944|GO:0005911|GO:0044238|GO:0005886|GO:0005515|GO:0019899|GO:0019538|GO:0006952|GO:0006793|GO:0016772|GO:0016773|GO:0016301|GO:0044267|GO:0006796|GO:0031625|GO:0006464|GO:0016310|GO:0004672|GO:0006468|GO:0004674	extracellular region|membrane|cell|cell junction|response to stimulus|metabolic process|catalytic activity|transferase activity|response to stress|cellular metabolic process|plasmodesma|cell periphery|cell-cell junction|primary metabolic process|plasma membrane|protein binding|enzyme binding|protein metabolic process|defense response|phosphorus metabolic process|transferase activity, transferring…	-	-	-	-	NW_015453991.1:43461-46518	-3.19900879756903	-3.21680085378622	1.51358491372891
107405711	LOC107405711	cysteine-rich receptor-like protein kinase 29	GO:0005576|GO:0016020|GO:0005623|GO:0030054|GO:0050896|GO:0008152|GO:0003824|GO:0016740|GO:0006950|GO:0051716|GO:0044237|GO:0009506|GO:0071944|GO:0009607|GO:0005911|GO:0051707|GO:0044238|GO:0006955|GO:0005886|GO:0005515|GO:0019899|GO:0008219|GO:0019538|GO:0006952|GO:0006793|GO:0009617|GO:0045087|GO:0016772|GO:0016773|GO:0002237|GO:0009626|GO:0016301|GO:0044267|GO:0006796|GO:0012501|GO:0042742|GO:…	extracellular region|membrane|cell|cell junction|response to stimulus|metabolic process|catalytic activity|transferase activity|response to stress|cellular response to stimulus|cellular metabolic process|plasmodesma|cell periphery|response to biotic stimulus|cell-cell junction|response to other organism|primary metabolic process|immune response|plasma membrane|protein binding|enzyme binding|cell …	-	-	-	-	NW_015453991.1:31845-33731	-2.76554908963268	1.35412545200449	-0.538513300286204
107412827	LOC107412827	cysteine-rich receptor-like protein kinase 25	GO:0005576|GO:0016020|GO:0005623|GO:0030054|GO:0050896|GO:0008152|GO:0003824|GO:0016740|GO:0006950|GO:0044237|GO:0009506|GO:0071944|GO:0005911|GO:0044238|GO:0005886|GO:0005515|GO:0019899|GO:0019538|GO:0006952|GO:0006793|GO:0016772|GO:0016773|GO:0016301|GO:0044267|GO:0006796|GO:0031625|GO:0006464|GO:0016310|GO:0004672|GO:0006468|GO:0004674	extracellular region|membrane|cell|cell junction|response to stimulus|metabolic process|catalytic activity|transferase activity|response to stress|cellular metabolic process|plasmodesma|cell periphery|cell-cell junction|primary metabolic process|plasma membrane|protein binding|enzyme binding|protein metabolic process|defense response|phosphorus metabolic process|transferase activity, transferring…	-	-	-	-	chr3:1408314-1409275	-2.18920780266064	0.402864021638247	1.55905944368798
107412828	LOC107412828	cysteine-rich receptor-like protein kinase 25	GO:0005576|GO:0016020|GO:0005623|GO:0030054|GO:0050896|GO:0008152|GO:0003824|GO:0016740|GO:0006950|GO:0044237|GO:0009506|GO:0071944|GO:0005911|GO:0044238|GO:0005886|GO:0005515|GO:0019899|GO:0019538|GO:0006952|GO:0006793|GO:0016772|GO:0016773|GO:0016301|GO:0044267|GO:0006796|GO:0031625|GO:0006464|GO:0016310|GO:0004672|GO:0006468|GO:0004674	extracellular region|membrane|cell|cell junction|response to stimulus|metabolic process|catalytic activity|transferase activity|response to stress|cellular metabolic process|plasmodesma|cell periphery|cell-cell junction|primary metabolic process|plasma membrane|protein binding|enzyme binding|protein metabolic process|defense response|phosphorus metabolic process|transferase activity, transferring…	-	-	-	-	chr3:1434078-1434494	-0.909266306084099	0.823387775685944	1.80535516248934
107417047	LOC107417047	cysteine-rich receptor-like protein kinase 6	GO:0016020|GO:0005623|GO:0030054|GO:0023052|GO:0004871|GO:0050896|GO:0008152|GO:0003824|GO:0016740|GO:0006950|GO:0051716|GO:0044237|GO:0004872|GO:0009506|GO:0071944|GO:0005911|GO:0038023|GO:0044238|GO:0005886|GO:0005515|GO:0009725|GO:0004888|GO:0019899|GO:0007165|GO:0019538|GO:0006952|GO:0070887|GO:0006793|GO:0001653|GO:0016772|GO:0007154|GO:0016773|GO:0019199|GO:0016301|GO:0007166|GO:0044267|GO:…	membrane|cell|cell junction|signaling|signal transducer activity|response to stimulus|metabolic process|catalytic activity|transferase activity|response to stress|cellular response to stimulus|cellular metabolic process|receptor activity|plasmodesma|cell periphery|cell-cell junction|signaling receptor activity|primary metabolic process|plasma membrane|protein binding|response to hormone|transmemb…	-	-	-	-	chr4:21401527-21405020	-3.63931810619203	-4.41421886591184	0.000671563925496437
107418100	LOC107418100	cysteine-rich receptor-like protein kinase 10	GO:0005576|GO:0016020|GO:0005623|GO:0030054|GO:0050896|GO:0008152|GO:0003824|GO:0016740|GO:0006950|GO:0044237|GO:0009506|GO:0071944|GO:0005911|GO:0044238|GO:0005886|GO:0005515|GO:0019899|GO:0019538|GO:0006952|GO:0006793|GO:0016772|GO:0016773|GO:0016301|GO:0044267|GO:0006796|GO:0031625|GO:0006464|GO:0016310|GO:0004672|GO:0006468|GO:0004674	extracellular region|membrane|cell|cell junction|response to stimulus|metabolic process|catalytic activity|transferase activity|response to stress|cellular metabolic process|plasmodesma|cell periphery|cell-cell junction|primary metabolic process|plasma membrane|protein binding|enzyme binding|protein metabolic process|defense response|phosphorus metabolic process|transferase activity, transferring…	-	-	-	-	chr1:10265326-10269053	2.72444208836	2.74201948510498	4.92836340602616
107418147	LOC107418147	cysteine-rich receptor-like protein kinase 10	GO:0005576|GO:0016020|GO:0005623|GO:0030054|GO:0050896|GO:0008152|GO:0003824|GO:0016740|GO:0006950|GO:0044237|GO:0009506|GO:0071944|GO:0005911|GO:0044238|GO:0005886|GO:0005515|GO:0019899|GO:0019538|GO:0006952|GO:0006793|GO:0016772|GO:0016773|GO:0016301|GO:0044267|GO:0006796|GO:0031625|GO:0006464|GO:0016310|GO:0004672|GO:0006468|GO:0004674	extracellular region|membrane|cell|cell junction|response to stimulus|metabolic process|catalytic activity|transferase activity|response to stress|cellular metabolic process|plasmodesma|cell periphery|cell-cell junction|primary metabolic process|plasma membrane|protein binding|enzyme binding|protein metabolic process|defense response|phosphorus metabolic process|transferase activity, transferring…	-	-	-	-	chr1:10524349-10527765	-3.68939389914947	0.82529619619739	3.40232594528753
107418156	LOC107418156	cysteine-rich receptor-like protein kinase 25	GO:0005576|GO:0016020|GO:0005623|GO:0030054|GO:0050896|GO:0008152|GO:0003824|GO:0016740|GO:0006950|GO:0044237|GO:0009506|GO:0071944|GO:0005911|GO:0044238|GO:0005886|GO:0005515|GO:0019899|GO:0019538|GO:0006952|GO:0006793|GO:0016772|GO:0016773|GO:0016301|GO:0044267|GO:0006796|GO:0031625|GO:0006464|GO:0016310|GO:0004672|GO:0006468|GO:0004674	extracellular region|membrane|cell|cell junction|response to stimulus|metabolic process|catalytic activity|transferase activity|response to stress|cellular metabolic process|plasmodesma|cell periphery|cell-cell junction|primary metabolic process|plasma membrane|protein binding|enzyme binding|protein metabolic process|defense response|phosphorus metabolic process|transferase activity, transferring…	-	-	-	-	chr1:10326090-10333134	3.72993007615044	3.90548219643826	5.78253546217248
107418170	LOC107418170	putative cysteine-rich receptor-like protein kinase 9	GO:0005576|GO:0016020|GO:0005623|GO:0030054|GO:0050896|GO:0008152|GO:0003824|GO:0016740|GO:0006950|GO:0044237|GO:0009506|GO:0071944|GO:0005911|GO:0044238|GO:0005886|GO:0005515|GO:0019899|GO:0019538|GO:0006952|GO:0006793|GO:0016772|GO:0016773|GO:0016301|GO:0044267|GO:0006796|GO:0031625|GO:0006464|GO:0016310|GO:0004672|GO:0006468|GO:0004674	extracellular region|membrane|cell|cell junction|response to stimulus|metabolic process|catalytic activity|transferase activity|response to stress|cellular metabolic process|plasmodesma|cell periphery|cell-cell junction|primary metabolic process|plasma membrane|protein binding|enzyme binding|protein metabolic process|defense response|phosphorus metabolic process|transferase activity, transferring…	-	-	-	-	chr1:10334150-10341637	2.65343244556988	2.74952488003527	5.13642329722762
107419423	LOC107419423	cysteine-rich receptor-like protein kinase 8	GO:0016020|GO:0005623|GO:0030054|GO:0050896|GO:0008152|GO:0003824|GO:0016740|GO:0006950|GO:0044237|GO:0009506|GO:0071944|GO:0009607|GO:0005911|GO:0051707|GO:0044238|GO:0005886|GO:0005515|GO:0019899|GO:0019538|GO:0006952|GO:0006793|GO:0009617|GO:0016772|GO:0016773|GO:0016301|GO:0044267|GO:0006796|GO:0042742|GO:0031625|GO:0006464|GO:0016310|GO:0004672|GO:0006468|GO:0004674	membrane|cell|cell junction|response to stimulus|metabolic process|catalytic activity|transferase activity|response to stress|cellular metabolic process|plasmodesma|cell periphery|response to biotic stimulus|cell-cell junction|response to other organism|primary metabolic process|plasma membrane|protein binding|enzyme binding|protein metabolic process|defense response|phosphorus metabolic process|…	-	-	-	-	chr1:14127817-14137408	1.27634608577929	-0.213933310641827	-0.905403508263764
107420444	LOC107420444	putative cysteine-rich receptor-like protein kinase 9	GO:0005576|GO:0016020|GO:0005623|GO:0030054|GO:0050896|GO:0008152|GO:0003824|GO:0016740|GO:0006950|GO:0044237|GO:0009506|GO:0071944|GO:0005911|GO:0044238|GO:0005886|GO:0005515|GO:0019899|GO:0019538|GO:0006952|GO:0006793|GO:0016772|GO:0016773|GO:0016301|GO:0044267|GO:0006796|GO:0031625|GO:0006464|GO:0016310|GO:0004672|GO:0006468|GO:0004674	extracellular region|membrane|cell|cell junction|response to stimulus|metabolic process|catalytic activity|transferase activity|response to stress|cellular metabolic process|plasmodesma|cell periphery|cell-cell junction|primary metabolic process|plasma membrane|protein binding|enzyme binding|protein metabolic process|defense response|phosphorus metabolic process|transferase activity, transferring…	-	-	-	-	chr1:14652247-14660243	2.5947181817247	2.72771185375509	5.14249509915564
107420610	LOC107420610	cysteine-rich receptor-like protein kinase 10	GO:0005576|GO:0016020|GO:0005623|GO:0030054|GO:0050896|GO:0008152|GO:0003824|GO:0016740|GO:0006950|GO:0044237|GO:0009506|GO:0071944|GO:0005911|GO:0044238|GO:0005886|GO:0005515|GO:0019899|GO:0019538|GO:0006952|GO:0006793|GO:0016772|GO:0016773|GO:0016301|GO:0044267|GO:0006796|GO:0031625|GO:0006464|GO:0016310|GO:0004672|GO:0006468|GO:0004674	extracellular region|membrane|cell|cell junction|response to stimulus|metabolic process|catalytic activity|transferase activity|response to stress|cellular metabolic process|plasmodesma|cell periphery|cell-cell junction|primary metabolic process|plasma membrane|protein binding|enzyme binding|protein metabolic process|defense response|phosphorus metabolic process|transferase activity, transferring…	-	-	-	-	chr1:14379436-14383025	1.96532411959593	2.63236051789057	4.44341624030387
107420755	LOC107420755	cysteine-rich receptor-like protein kinase 10	GO:0005576|GO:0016020|GO:0005623|GO:0030054|GO:0050896|GO:0008152|GO:0003824|GO:0016740|GO:0006950|GO:0044237|GO:0009506|GO:0071944|GO:0005911|GO:0044238|GO:0005886|GO:0005515|GO:0019899|GO:0019538|GO:0006952|GO:0006793|GO:0016772|GO:0016773|GO:0016301|GO:0044267|GO:0006796|GO:0031625|GO:0006464|GO:0016310|GO:0004672|GO:0006468|GO:0004674	extracellular region|membrane|cell|cell junction|response to stimulus|metabolic process|catalytic activity|transferase activity|response to stress|cellular metabolic process|plasmodesma|cell periphery|cell-cell junction|primary metabolic process|plasma membrane|protein binding|enzyme binding|protein metabolic process|defense response|phosphorus metabolic process|transferase activity, transferring…	-	-	-	-	chr1:14590920-14595226	3.18656539554381	3.15919630898418	5.40916683585209
107421163	LOC107421163	cysteine-rich receptor-like protein kinase 10	GO:0005576|GO:0016020|GO:0005623|GO:0030054|GO:0050896|GO:0008152|GO:0003824|GO:0016740|GO:0006950|GO:0044237|GO:0009506|GO:0071944|GO:0005911|GO:0044238|GO:0005886|GO:0005515|GO:0019899|GO:0019538|GO:0006952|GO:0006793|GO:0016772|GO:0016773|GO:0016301|GO:0044267|GO:0006796|GO:0031625|GO:0006464|GO:0016310|GO:0004672|GO:0006468|GO:0004674	extracellular region|membrane|cell|cell junction|response to stimulus|metabolic process|catalytic activity|transferase activity|response to stress|cellular metabolic process|plasmodesma|cell periphery|cell-cell junction|primary metabolic process|plasma membrane|protein binding|enzyme binding|protein metabolic process|defense response|phosphorus metabolic process|transferase activity, transferring…	-	-	-	-	chr1:14762303-14765761	-3.34120029851417	0.789511288920762	3.30319644009336
107421181	LOC107421181	cysteine-rich receptor-like protein kinase 10	GO:0005576|GO:0016020|GO:0005623|GO:0030054|GO:0050896|GO:0008152|GO:0003824|GO:0016740|GO:0006950|GO:0005622|GO:0044237|GO:0009506|GO:0071944|GO:0005911|GO:0044238|GO:0005886|GO:0005515|GO:0009725|GO:0019899|GO:0043231|GO:0019538|GO:0006952|GO:0005737|GO:0006793|GO:0016772|GO:0016773|GO:0009737|GO:0005773|GO:0016301|GO:0044267|GO:0006796|GO:0031625|GO:0006464|GO:0016310|GO:0004672|GO:0006468|GO:…	extracellular region|membrane|cell|cell junction|response to stimulus|metabolic process|catalytic activity|transferase activity|response to stress|intracellular|cellular metabolic process|plasmodesma|cell periphery|cell-cell junction|primary metabolic process|plasma membrane|protein binding|response to hormone|enzyme binding|intracellular membrane-bounded organelle|protein metabolic process|defen…	-	-	-	-	chr1:14722114-14725296	-2.79857893092969	-1.06971925531779	0.410268619611394
107421395	LOC107421395	cysteine-rich repeat secretory protein 38-like	GO:0005576|GO:0005623|GO:0050896|GO:0005622|GO:0071944|GO:0009725|GO:0005618|GO:0043231|GO:0005737|GO:0009737|GO:0005773	extracellular region|cell|response to stimulus|intracellular|cell periphery|response to hormone|cell wall|intracellular membrane-bounded organelle|cytoplasm|response to abscisic acid|vacuole	-	-	-	-	chr1:14900135-14900989	1.94647167359262	1.78860521363844	-1.40405865356474
107422264	LOC107422264	cysteine-rich receptor-like protein kinase 25	GO:0005576|GO:0016020|GO:0005623|GO:0030054|GO:0050896|GO:0008152|GO:0003824|GO:0016740|GO:0006950|GO:0044237|GO:0009506|GO:0071944|GO:0005911|GO:0044238|GO:0005886|GO:0005515|GO:0019899|GO:0019538|GO:0006952|GO:0006793|GO:0016772|GO:0016773|GO:0016301|GO:0044267|GO:0006796|GO:0031625|GO:0006464|GO:0016310|GO:0004672|GO:0006468|GO:0004674	extracellular region|membrane|cell|cell junction|response to stimulus|metabolic process|catalytic activity|transferase activity|response to stress|cellular metabolic process|plasmodesma|cell periphery|cell-cell junction|primary metabolic process|plasma membrane|protein binding|enzyme binding|protein metabolic process|defense response|phosphorus metabolic process|transferase activity, transferring…	-	-	-	-	chr7:10739741-10770032	-0.581415843453693	0.766725870609827	3.44396357038522
107422266	LOC107422266	cysteine-rich receptor-like protein kinase 25	GO:0005576|GO:0016020|GO:0005623|GO:0030054|GO:0050896|GO:0008152|GO:0003824|GO:0016740|GO:0006950|GO:0044237|GO:0009506|GO:0071944|GO:0005911|GO:0044238|GO:0005886|GO:0005515|GO:0019899|GO:0019538|GO:0006952|GO:0006793|GO:0016772|GO:0016773|GO:0016301|GO:0044267|GO:0006796|GO:0031625|GO:0006464|GO:0016310|GO:0004672|GO:0006468|GO:0004674	extracellular region|membrane|cell|cell junction|response to stimulus|metabolic process|catalytic activity|transferase activity|response to stress|cellular metabolic process|plasmodesma|cell periphery|cell-cell junction|primary metabolic process|plasma membrane|protein binding|enzyme binding|protein metabolic process|defense response|phosphorus metabolic process|transferase activity, transferring…	-	-	-	-	chr7:10793777-10796757	-0.552283594512999	1.38399223337666	1.50048730434907
107435742	LOC107435742	cysteine-rich receptor-like protein kinase 10	GO:0016020|GO:0005623|GO:0030054|GO:0023052|GO:0004871|GO:0050896|GO:0008152|GO:0003824|GO:0016740|GO:0006950|GO:0051716|GO:0044237|GO:0004872|GO:0009506|GO:0071944|GO:0005911|GO:0038023|GO:0044238|GO:0005886|GO:0005515|GO:0009725|GO:0004888|GO:0019899|GO:0007165|GO:0019538|GO:0006952|GO:0070887|GO:0006793|GO:0001653|GO:0016772|GO:0007154|GO:0016773|GO:0019199|GO:0016301|GO:0007166|GO:0044267|GO:…	membrane|cell|cell junction|signaling|signal transducer activity|response to stimulus|metabolic process|catalytic activity|transferase activity|response to stress|cellular response to stimulus|cellular metabolic process|receptor activity|plasmodesma|cell periphery|cell-cell junction|signaling receptor activity|primary metabolic process|plasma membrane|protein binding|response to hormone|transmemb…	-	-	-	-	NW_015453562.1:57123-60466	1.74379886185865	3.18545721242768	-0.570633066899952

## Sheet: CML
Gene_ID	Gene_name	Description	GO_id	GO_term	KO_ID	KO_Description	kegg_id	kegg_term	locus	log2(0 h)	log2(1 h)	log2(12 h)
107404544	LOC107404544	putative calcium-binding protein CML19	GO:0016020|GO:0005623|GO:0050896|GO:0006950|GO:0005622|GO:0071944|GO:0005886|GO:0043231|GO:0043169|GO:0009611|GO:0005634|GO:0046872|GO:0005509	membrane|cell|response to stimulus|response to stress|intracellular|cell periphery|plasma membrane|intracellular membrane-bounded organelle|cation binding|response to wounding|nucleus|metal ion binding|calcium ion binding	-	-	ko04626|ko04114|ko04070|ko04922|ko04014|ko04022|ko04024|ko04020|ko04015|ko04750|ko04713|ko04924|ko04740|ko04744|ko04925|ko04745	Plant-pathogen interaction|Oocyte meiosis|Phosphatidylinositol signaling system|Glucagon signaling pathway|Ras signaling pathway|cGMP-PKG signaling pathway|cAMP signaling pathway|Calcium signaling pathway|Rap1 signaling pathway|Inflammatory mediator regulation of TRP channels|Circadian entrainment|Renin secretion|Olfactory transduction|Phototransduction|Aldosterone synthesis and secretion|Phototr…	NW_015453759.1:46996-47711	0.871668944184909	4.82502927503345	5.16380971486662
107406365	LOC107406365	probable calcium-binding protein CML23	GO:0032502|GO:0005623|GO:0040007|GO:0050896|GO:0006950|GO:0009653|GO:0005622|GO:0016049|GO:0048589|GO:0060560|GO:0043231|GO:0009266|GO:0007275|GO:0043169|GO:0009409|GO:0005737|GO:0010015|GO:0048364|GO:0048869|GO:0048767|GO:0005634|GO:0030154|GO:0046872|GO:0080147|GO:0010053|GO:0090558|GO:0022622|GO:0010054|GO:0005509|GO:0090627|GO:0048765	developmental process|cell|growth|response to stimulus|response to stress|anatomical structure morphogenesis|intracellular|cell growth|developmental growth|developmental growth involved in morphogenesis|intracellular membrane-bounded organelle|response to temperature stimulus|multicellular organism development|cation binding|response to cold|cytoplasm|root morphogenesis|root development|cellular …	-	-	ko04626|ko04114|ko04070|ko04922|ko04014|ko04022|ko04024|ko04020|ko04015|ko04750|ko04713|ko04924|ko04740|ko04744|ko04925|ko04745	Plant-pathogen interaction|Oocyte meiosis|Phosphatidylinositol signaling system|Glucagon signaling pathway|Ras signaling pathway|cGMP-PKG signaling pathway|cAMP signaling pathway|Calcium signaling pathway|Rap1 signaling pathway|Inflammatory mediator regulation of TRP channels|Circadian entrainment|Renin secretion|Olfactory transduction|Phototransduction|Aldosterone synthesis and secretion|Phototr…	NW_015454190.1:29218-30192	-0.237309432220175	1.93847871272728	1.28818778286874
107411788	LOC107411788	calmodulin-binding protein 60 D	GO:0005623|GO:0050896|GO:0008152|GO:0006950|GO:0005622|GO:0044237|GO:0009058|GO:0006807|GO:0044238|GO:0005515|GO:0043231|GO:0003676|GO:0006139|GO:0006725|GO:0005516|GO:0019438|GO:0010467|GO:0005634|GO:0003677|GO:0010468|GO:0051252|GO:0016070|GO:0032774|GO:0006351|GO:2001141|GO:0006355|GO:1903506	cell|response to stimulus|metabolic process|response to stress|intracellular|cellular metabolic process|biosynthetic process|nitrogen compound metabolic process|primary metabolic process|protein binding|intracellular membrane-bounded organelle|nucleic acid binding|nucleobase-containing compound metabolic process|cellular aromatic compound metabolic process|calmodulin binding|aromatic compound bio…	-	-	-	-	chr2:20393592-20406937	1.0742768631804	5.73408829641071	5.43943717057769
107415541	LOC107415541	probable calcium-binding protein CML30	GO:0043169|GO:0046872|GO:0005509	cation binding|metal ion binding|calcium ion binding	-	-	ko04626|ko04114|ko04070|ko04922|ko04014|ko04022|ko04024|ko04020|ko04015|ko04750|ko04713|ko04924|ko04740|ko04744|ko04925|ko04745	Plant-pathogen interaction|Oocyte meiosis|Phosphatidylinositol signaling system|Glucagon signaling pathway|Ras signaling pathway|cGMP-PKG signaling pathway|cAMP signaling pathway|Calcium signaling pathway|Rap1 signaling pathway|Inflammatory mediator regulation of TRP channels|Circadian entrainment|Renin secretion|Olfactory transduction|Phototransduction|Aldosterone synthesis and secretion|Phototr…	chr4:4229614-4239556	2.78456521503578	5.08575456253737	6.20996509031859
107416249	LOC107416249	calcium-binding protein CML24-like	GO:0032502|GO:0005623|GO:0000003|GO:0008152|GO:0003006|GO:0005622|GO:0044237|GO:0006807|GO:0050793|GO:2000026|GO:0009791|GO:0009909|GO:0043231|GO:0007275|GO:0043169|GO:0072593|GO:0048367|GO:0080164|GO:0048831|GO:0005634|GO:0009908|GO:0046872|GO:2000377|GO:0005509	developmental process|cell|reproduction|metabolic process|developmental process involved in reproduction|intracellular|cellular metabolic process|nitrogen compound metabolic process|regulation of developmental process|regulation of multicellular organismal development|post-embryonic development|regulation of flower development|intracellular membrane-bounded organelle|multicellular organism develo…	-	-	ko04626|ko04114|ko04070|ko04922|ko04014|ko04022|ko04024|ko04020|ko04015|ko04750|ko04713|ko04924|ko04740|ko04744|ko04925|ko04745	Plant-pathogen interaction|Oocyte meiosis|Phosphatidylinositol signaling system|Glucagon signaling pathway|Ras signaling pathway|cGMP-PKG signaling pathway|cAMP signaling pathway|Calcium signaling pathway|Rap1 signaling pathway|Inflammatory mediator regulation of TRP channels|Circadian entrainment|Renin secretion|Olfactory transduction|Phototransduction|Aldosterone synthesis and secretion|Phototr…	chr4:11939147-11940181	3.30218376320699	5.32750596283993	4.23303788163843
107416394	LOC107416394	calcium-binding protein CML24-like	GO:0032502|GO:0005623|GO:0000003|GO:0008152|GO:0003006|GO:0005622|GO:0044237|GO:0006807|GO:0050793|GO:2000026|GO:0009791|GO:0009909|GO:0043231|GO:0007275|GO:0043169|GO:0072593|GO:0048367|GO:0080164|GO:0048831|GO:0005634|GO:0009908|GO:0046872|GO:2000377|GO:0005509	developmental process|cell|reproduction|metabolic process|developmental process involved in reproduction|intracellular|cellular metabolic process|nitrogen compound metabolic process|regulation of developmental process|regulation of multicellular organismal development|post-embryonic development|regulation of flower development|intracellular membrane-bounded organelle|multicellular organism develo…	-	-	ko04626|ko04114|ko04070|ko04922|ko04014|ko04022|ko04024|ko04020|ko04015|ko04750|ko04713|ko04924|ko04740|ko04744|ko04925|ko04745	Plant-pathogen interaction|Oocyte meiosis|Phosphatidylinositol signaling system|Glucagon signaling pathway|Ras signaling pathway|cGMP-PKG signaling pathway|cAMP signaling pathway|Calcium signaling pathway|Rap1 signaling pathway|Inflammatory mediator regulation of TRP channels|Circadian entrainment|Renin secretion|Olfactory transduction|Phototransduction|Aldosterone synthesis and secretion|Phototr…	chr4:13348511-13349531	2.77396206080509	5.18357550722251	3.84836038614563
107417689	LOC107417689	putative calcium-binding protein CML19	GO:0016020|GO:0005623|GO:0050896|GO:0006950|GO:0005622|GO:0071944|GO:0005886|GO:0043231|GO:0043169|GO:0009611|GO:0005634|GO:0046872|GO:0005509	membrane|cell|response to stimulus|response to stress|intracellular|cell periphery|plasma membrane|intracellular membrane-bounded organelle|cation binding|response to wounding|nucleus|metal ion binding|calcium ion binding	-	-	ko04626|ko04114|ko04070|ko04922|ko04014|ko04022|ko04024|ko04020|ko04015|ko04750|ko04713|ko04924|ko04740|ko04744|ko04925|ko04745	Plant-pathogen interaction|Oocyte meiosis|Phosphatidylinositol signaling system|Glucagon signaling pathway|Ras signaling pathway|cGMP-PKG signaling pathway|cAMP signaling pathway|Calcium signaling pathway|Rap1 signaling pathway|Inflammatory mediator regulation of TRP channels|Circadian entrainment|Renin secretion|Olfactory transduction|Phototransduction|Aldosterone synthesis and secretion|Phototr…	chr5:3362751-3363396	1.65290002747208	5.6694096339911	5.89345046279025
107417690	LOC107417690	putative calcium-binding protein CML19	GO:0016020|GO:0005623|GO:0050896|GO:0006950|GO:0005622|GO:0071944|GO:0005886|GO:0043231|GO:0043169|GO:0009611|GO:0005634|GO:0046872|GO:0005509	membrane|cell|response to stimulus|response to stress|intracellular|cell periphery|plasma membrane|intracellular membrane-bounded organelle|cation binding|response to wounding|nucleus|metal ion binding|calcium ion binding	-	-	ko04626|ko04114|ko04070|ko04922|ko04014|ko04022|ko04024|ko04020|ko04015|ko04750|ko04713|ko04924|ko04740|ko04744|ko04925|ko04745	Plant-pathogen interaction|Oocyte meiosis|Phosphatidylinositol signaling system|Glucagon signaling pathway|Ras signaling pathway|cGMP-PKG signaling pathway|cAMP signaling pathway|Calcium signaling pathway|Rap1 signaling pathway|Inflammatory mediator regulation of TRP channels|Circadian entrainment|Renin secretion|Olfactory transduction|Phototransduction|Aldosterone synthesis and secretion|Phototr…	chr5:3302399-3303046	1.2567508352582	5.55329632222136	5.88787772581439
107418972	LOC107418972	calmodulin	GO:0005623|GO:0050896|GO:0006950|GO:0005622|GO:0006970|GO:0043169|GO:0005737|GO:0006972|GO:0005829|GO:0046872|GO:0009651|GO:0005509|GO:0042538	cell|response to stimulus|response to stress|intracellular|response to osmotic stress|cation binding|cytoplasm|hyperosmotic response|cytosol|metal ion binding|response to salt stress|calcium ion binding|hyperosmotic salinity response	-	-	-	-	chr5:18095051-18096105	4.15085222432379	5.72790771132304	7.22553266408932
107421107	LOC107421107	probable calcium-binding protein CML44	GO:0005623|GO:0005622|GO:0043169|GO:0005737|GO:0046872|GO:0005509	cell|intracellular|cation binding|cytoplasm|metal ion binding|calcium ion binding	-	-	ko04626	Plant-pathogen interaction	chr6:11968908-11970079	3.90662348120249	6.6972814215802	4.47545866608486
107422901	LOC107422901	calcium-binding protein PBP1-like	GO:0016020|GO:0005623|GO:0050896|GO:0071944|GO:0005886|GO:0043169|GO:0080167|GO:0046872|GO:0005509	membrane|cell|response to stimulus|cell periphery|plasma membrane|cation binding|response to karrikin|metal ion binding|calcium ion binding	-	-	-	-	chr1:17500668-17501518	-1.35355192405767	0.591931996698739	1.55494045671723
107424823	LOC107424823	probable calcium-binding protein CML41	GO:0043169|GO:0046872|GO:0005509	cation binding|metal ion binding|calcium ion binding	-	-	ko04626|ko04114|ko04070|ko04922|ko04014|ko04022|ko04024|ko04020|ko04015|ko04750|ko04713|ko04924|ko04740|ko04744|ko04925|ko04745	Plant-pathogen interaction|Oocyte meiosis|Phosphatidylinositol signaling system|Glucagon signaling pathway|Ras signaling pathway|cGMP-PKG signaling pathway|cAMP signaling pathway|Calcium signaling pathway|Rap1 signaling pathway|Inflammatory mediator regulation of TRP channels|Circadian entrainment|Renin secretion|Olfactory transduction|Phototransduction|Aldosterone synthesis and secretion|Phototr…	chr8:9005459-9006418	3.67226056100269	5.99143975751793	6.58593100837902
107424831	LOC107424831	probable calcium-binding protein CML41	GO:0043169|GO:0046872|GO:0005509	cation binding|metal ion binding|calcium ion binding	-	-	ko04626	Plant-pathogen interaction	chr8:9072278-9073118	-0.735603196267184	0.246492597835157	4.14050782275537
107425895	LOC107425895	calmodulin-3-like	GO:0043169|GO:0046872|GO:0005509	cation binding|metal ion binding|calcium ion binding	-	-	ko04626|ko04114|ko04070|ko04922|ko04014|ko04022|ko04024|ko04020|ko04015|ko04750|ko04713|ko04924|ko04740|ko04744|ko04925|ko04745	Plant-pathogen interaction|Oocyte meiosis|Phosphatidylinositol signaling system|Glucagon signaling pathway|Ras signaling pathway|cGMP-PKG signaling pathway|cAMP signaling pathway|Calcium signaling pathway|Rap1 signaling pathway|Inflammatory mediator regulation of TRP channels|Circadian entrainment|Renin secretion|Olfactory transduction|Phototransduction|Aldosterone synthesis and secretion|Phototr…	chr9:1403538-1404891	0.192979007701161	2.5470056072	2.64604289061071
107427847	LOC107427847	putative calcium-binding protein CML23	GO:0016020|GO:0005623|GO:0050896|GO:0006950|GO:0005622|GO:0071944|GO:0005886|GO:0043231|GO:0043169|GO:0009611|GO:0005634|GO:0046872|GO:0005509	membrane|cell|response to stimulus|response to stress|intracellular|cell periphery|plasma membrane|intracellular membrane-bounded organelle|cation binding|response to wounding|nucleus|metal ion binding|calcium ion binding	-	-	ko04626	Plant-pathogen interaction	chr9:23441853-23442433	-0.14017964529923	4.19437693061331	4.50614672161369
107427870	LOC107427870	putative calcium-binding protein CML23	GO:0016020|GO:0005623|GO:0050896|GO:0006950|GO:0005622|GO:0071944|GO:0005886|GO:0043231|GO:0043169|GO:0009611|GO:0005634|GO:0046872|GO:0005509	membrane|cell|response to stimulus|response to stress|intracellular|cell periphery|plasma membrane|intracellular membrane-bounded organelle|cation binding|response to wounding|nucleus|metal ion binding|calcium ion binding	-	-	ko04626	Plant-pathogen interaction	chr9:24069689-24070254	-1.35002097528432	3.37148249126535	4.5232084245806
107430853	LOC107430853	calcium-binding protein PBP1-like	GO:0016020|GO:0005623|GO:0050896|GO:0071944|GO:0005886|GO:0043169|GO:0080167|GO:0046872|GO:0005509	membrane|cell|response to stimulus|cell periphery|plasma membrane|cation binding|response to karrikin|metal ion binding|calcium ion binding	-	-	-	-	chr1:32173755-32174530	4.23094880023523	6.67601971405407	6.615085027125
107434111	LOC107434111	probable calcium-binding protein CML27	GO:0016020|GO:0005623|GO:0005622|GO:0071944|GO:0005886|GO:0043231|GO:0043169|GO:0005737|GO:0005773|GO:0046872|GO:0005509	membrane|cell|intracellular|cell periphery|plasma membrane|intracellular membrane-bounded organelle|cation binding|cytoplasm|vacuole|metal ion binding|calcium ion binding	-	-	ko04626|ko04114|ko04070|ko04922|ko04014|ko04022|ko04024|ko04020|ko04015|ko04750|ko04713|ko04924|ko04740|ko04744|ko04925|ko04745	Plant-pathogen interaction|Oocyte meiosis|Phosphatidylinositol signaling system|Glucagon signaling pathway|Ras signaling pathway|cGMP-PKG signaling pathway|cAMP signaling pathway|Calcium signaling pathway|Rap1 signaling pathway|Inflammatory mediator regulation of TRP channels|Circadian entrainment|Renin secretion|Olfactory transduction|Phototransduction|Aldosterone synthesis and secretion|Phototr…	NW_015453427.1:135242-136169	6.06589628054928	8.14819041474004	7.42583688536127

## Sheet: ROS scavenging 
Gene_ID	Gene_name	Description	GO_id	GO_term	KO_ID	KO_Description	kegg_id	kegg_term	locus	log2(0 h)	log2(1 h)	log2(12 h)
107403660	LOC107403660	peroxidase 16-like	GO:0005576|GO:0016209|GO:0050896|GO:0008152|GO:0003824|GO:0016491|GO:0004601|GO:0006950|GO:0044237|GO:0046906|GO:0006979|GO:0043169|GO:0042744|GO:0055114|GO:0072593|GO:0042743|GO:0046872|GO:0020037	extracellular region|antioxidant activity|response to stimulus|metabolic process|catalytic activity|oxidoreductase activity|peroxidase activity|response to stress|cellular metabolic process|tetrapyrrole binding|response to oxidative stress|cation binding|hydrogen peroxide catabolic process|oxidation-reduction process|reactive oxygen species metabolic process|hydrogen peroxide metabolic process|me…	-	-	ko01100|ko01110|ko00940	Metabolic pathways|Biosynthesis of secondary metabolites|Phenylpropanoid biosynthesis	NW_015453631.1:38762-40616	7.48614771938953	7.22827826207867	5.33489569908806
107406150	LOC107406150	peroxidase 10-like	GO:0005576|GO:0016209|GO:0050896|GO:0008152|GO:0003824|GO:0016491|GO:0004601|GO:0006950|GO:0044237|GO:0046906|GO:0006979|GO:0043169|GO:0042744|GO:0055114|GO:0072593|GO:0042743|GO:0046872|GO:0020037	extracellular region|antioxidant activity|response to stimulus|metabolic process|catalytic activity|oxidoreductase activity|peroxidase activity|response to stress|cellular metabolic process|tetrapyrrole binding|response to oxidative stress|cation binding|hydrogen peroxide catabolic process|oxidation-reduction process|reactive oxygen species metabolic process|hydrogen peroxide metabolic process|me…	-	-	ko01100|ko01110|ko00940	Metabolic pathways|Biosynthesis of secondary metabolites|Phenylpropanoid biosynthesis	NW_015454113.1:8840-11228	5.63872339155126	5.39010096851452	3.2730696073686
107407421	LOC107407421	peroxidase 21-like	GO:0005576|GO:0005623|GO:0030054|GO:0016209|GO:0050896|GO:0003824|GO:0016491|GO:0004601|GO:0006950|GO:0071554|GO:0005622|GO:0009506|GO:0071944|GO:0009607|GO:0005911|GO:0051707|GO:0009620|GO:0005618|GO:0006952|GO:0005737|GO:0071669|GO:0071555|GO:0009505|GO:0005829|GO:0009664|GO:0050832	extracellular region|cell|cell junction|antioxidant activity|response to stimulus|catalytic activity|oxidoreductase activity|peroxidase activity|response to stress|cell wall organization or biogenesis|intracellular|plasmodesma|cell periphery|response to biotic stimulus|cell-cell junction|response to other organism|response to fungus|cell wall|defense response|cytoplasm|plant-type cell wall organi…	-	-	ko01100|ko01110|ko00940	Metabolic pathways|Biosynthesis of secondary metabolites|Phenylpropanoid biosynthesis	NW_015454718.1:4103-7721	3.15530380443291	2.42780427773133	5.56602467553581
107410248	LOC107410248	cationic peroxidase 2-like	GO:0005576|GO:0016020|GO:0005623|GO:0030054|GO:0016209|GO:0050896|GO:0008152|GO:0003824|GO:0016491|GO:0004601|GO:0006950|GO:0071554|GO:0044237|GO:0009506|GO:0071944|GO:0009607|GO:0005911|GO:0051707|GO:0048046|GO:0045730|GO:0009620|GO:0005618|GO:0046906|GO:0006952|GO:0043169|GO:0006725|GO:0071669|GO:0019748|GO:0071555|GO:0009698|GO:0009505|GO:0009808|GO:0009664|GO:0046872|GO:0050832|GO:0020037	extracellular region|membrane|cell|cell junction|antioxidant activity|response to stimulus|metabolic process|catalytic activity|oxidoreductase activity|peroxidase activity|response to stress|cell wall organization or biogenesis|cellular metabolic process|plasmodesma|cell periphery|response to biotic stimulus|cell-cell junction|response to other organism|apoplast|respiratory burst|response to fung…	-	-	ko01100|ko01110|ko00940	Metabolic pathways|Biosynthesis of secondary metabolites|Phenylpropanoid biosynthesis	chr2:905339-906117	3.00249363321724	4.36695532888189	0.133636126204558
107410255	LOC107410255	peroxidase N1-like	GO:0005576|GO:0016020|GO:0005623|GO:0030054|GO:0016209|GO:0050896|GO:0008152|GO:0003824|GO:0016491|GO:0004601|GO:0006950|GO:0071554|GO:0044237|GO:0009506|GO:0071944|GO:0009607|GO:0005911|GO:0051707|GO:0048046|GO:0045730|GO:0009620|GO:0005618|GO:0046906|GO:0006952|GO:0043169|GO:0006725|GO:0071669|GO:0019748|GO:0071555|GO:0009698|GO:0009505|GO:0009808|GO:0009664|GO:0046872|GO:0050832|GO:0020037	extracellular region|membrane|cell|cell junction|antioxidant activity|response to stimulus|metabolic process|catalytic activity|oxidoreductase activity|peroxidase activity|response to stress|cell wall organization or biogenesis|cellular metabolic process|plasmodesma|cell periphery|response to biotic stimulus|cell-cell junction|response to other organism|apoplast|respiratory burst|response to fung…	-	-	ko01100|ko01110|ko00940	Metabolic pathways|Biosynthesis of secondary metabolites|Phenylpropanoid biosynthesis	chr2:897135-898737	4.6280803703498	5.58466129404582	2.13507394191653
107411607	LOC107411607	peroxidase 4-like	GO:0032502|GO:0005576|GO:0005623|GO:0016209|GO:0008152|GO:0003824|GO:0016491|GO:0004601|GO:0005622|GO:0044237|GO:0071944|GO:0009058|GO:0012505|GO:0048046|GO:0005515|GO:0005618|GO:0043231|GO:0046906|GO:0043169|GO:0006725|GO:0005737|GO:0019748|GO:0005794|GO:0009698|GO:0009808|GO:0005829|GO:0019438|GO:2000762|GO:0009699|GO:0044550|GO:0046872|GO:0010087|GO:0020037|GO:0009809|GO:0010089|GO:1901430|GO:…	developmental process|extracellular region|cell|antioxidant activity|metabolic process|catalytic activity|oxidoreductase activity|peroxidase activity|intracellular|cellular metabolic process|cell periphery|biosynthetic process|endomembrane system|apoplast|protein binding|cell wall|intracellular membrane-bounded organelle|tetrapyrrole binding|cation binding|cellular aromatic compound metabolic pro…	-	-	ko01100|ko01110|ko00940	Metabolic pathways|Biosynthesis of secondary metabolites|Phenylpropanoid biosynthesis	chr2:18450219-18470796	-4.46030293369935	-2.29247028662952	5.40272852194771
107411709	LOC107411709	peroxidase 5-like	GO:0048511|GO:0008152|GO:0044237|GO:0042752|GO:0009058|GO:0006807|GO:0007623|GO:0044238|GO:0032922|GO:0019538|GO:0097167|GO:0006518|GO:0051246|GO:0010467|GO:0044267|GO:0010468|GO:0043043|GO:0006412|GO:0010608|GO:0006417	rhythmic process|metabolic process|cellular metabolic process|regulation of circadian rhythm|biosynthetic process|nitrogen compound metabolic process|circadian rhythm|primary metabolic process|circadian regulation of gene expression|protein metabolic process|circadian regulation of translation|peptide metabolic process|regulation of protein metabolic process|gene expression|cellular protein metab…	-	-	ko01100|ko01110|ko00940	Metabolic pathways|Biosynthesis of secondary metabolites|Phenylpropanoid biosynthesis	chr2:19379845-19381296	0.867613597351291	2.90804445795585	3.3008044669655
107412539	LOC107412539	peroxidase 59	GO:0005576|GO:0005623|GO:0016209|GO:0050896|GO:0008152|GO:0003824|GO:0016491|GO:0004601|GO:0006950|GO:0005622|GO:0044237|GO:0043231|GO:0046906|GO:0006979|GO:0043169|GO:0005737|GO:0042744|GO:0055114|GO:0072593|GO:0005634|GO:0042743|GO:0046872|GO:0020037	extracellular region|cell|antioxidant activity|response to stimulus|metabolic process|catalytic activity|oxidoreductase activity|peroxidase activity|response to stress|intracellular|cellular metabolic process|intracellular membrane-bounded organelle|tetrapyrrole binding|response to oxidative stress|cation binding|cytoplasm|hydrogen peroxide catabolic process|oxidation-reduction process|reactive o…	-	-	ko01100|ko01110|ko00940	Metabolic pathways|Biosynthesis of secondary metabolites|Phenylpropanoid biosynthesis	chr2:26382865-26383792	5.79677627086119	5.32357016737669	2.85055177930666
107414445	LOC107414445	peroxidase 66	GO:0005576|GO:0005623|GO:0030054|GO:0016209|GO:0050896|GO:0003824|GO:0016491|GO:0004601|GO:0006950|GO:0071554|GO:0009506|GO:0071944|GO:0005911|GO:0005618|GO:0046906|GO:0043169|GO:0071669|GO:0071555|GO:0009505|GO:0009664|GO:0046872|GO:0020037	extracellular region|cell|cell junction|antioxidant activity|response to stimulus|catalytic activity|oxidoreductase activity|peroxidase activity|response to stress|cell wall organization or biogenesis|plasmodesma|cell periphery|cell-cell junction|cell wall|tetrapyrrole binding|cation binding|plant-type cell wall organization or biogenesis|cell wall organization|plant-type cell wall|plant-type cel…	-	-	ko01100|ko01110|ko00940	Metabolic pathways|Biosynthesis of secondary metabolites|Phenylpropanoid biosynthesis	chr3:22393026-22394344	1.98910158654286	2.60924305954676	4.41840716179135
107415104	LOC107415104	peroxidase A2-like	GO:0016209|GO:0003824|GO:0016491|GO:0004601|GO:0046906|GO:0020037	antioxidant activity|catalytic activity|oxidoreductase activity|peroxidase activity|tetrapyrrole binding|heme binding	-	-	ko01100|ko01110|ko00940	Metabolic pathways|Biosynthesis of secondary metabolites|Phenylpropanoid biosynthesis	chr4:561120-563369	2.13870562927929	2.72061793126945	5.98168759634338
107415435	LOC107415435	peroxidase 31-like	GO:0005576|GO:0005623|GO:0016209|GO:0050896|GO:0008152|GO:0003824|GO:0016491|GO:0004601|GO:0006950|GO:0005622|GO:0044237|GO:0071944|GO:0005515|GO:0005618|GO:0046906|GO:0006979|GO:0043169|GO:0005737|GO:0042744|GO:0055114|GO:0072593|GO:0009505|GO:0005829|GO:0042743|GO:0046872|GO:0020037	extracellular region|cell|antioxidant activity|response to stimulus|metabolic process|catalytic activity|oxidoreductase activity|peroxidase activity|response to stress|intracellular|cellular metabolic process|cell periphery|protein binding|cell wall|tetrapyrrole binding|response to oxidative stress|cation binding|cytoplasm|hydrogen peroxide catabolic process|oxidation-reduction process|reactive o…	-	-	ko01100|ko01110|ko00940	Metabolic pathways|Biosynthesis of secondary metabolites|Phenylpropanoid biosynthesis	chr4:2861735-2863111	6.12599973861416	5.06587199355614	4.0614370067734
107417029	LOC107417029	peroxidase 56-like	GO:0005576|GO:0005623|GO:0030054|GO:0016209|GO:0050896|GO:0003824|GO:0016491|GO:0004601|GO:0006950|GO:0071554|GO:0009506|GO:0071944|GO:0005911|GO:0005618|GO:0071669|GO:0071555|GO:0009505|GO:0009664	extracellular region|cell|cell junction|antioxidant activity|response to stimulus|catalytic activity|oxidoreductase activity|peroxidase activity|response to stress|cell wall organization or biogenesis|plasmodesma|cell periphery|cell-cell junction|cell wall|plant-type cell wall organization or biogenesis|cell wall organization|plant-type cell wall|plant-type cell wall organization	-	-	ko01100|ko01110|ko00940	Metabolic pathways|Biosynthesis of secondary metabolites|Phenylpropanoid biosynthesis	chr4:21004720-21008294	8.59134279411053	8.38683462583675	2.19330996342392
107417043	LOC107417043	peroxidase 3-like	GO:0005576|GO:0005623|GO:0030054|GO:0016209|GO:0050896|GO:0003824|GO:0016491|GO:0004601|GO:0006950|GO:0071554|GO:0005622|GO:0009506|GO:0071944|GO:0005911|GO:0012505|GO:0005618|GO:0043231|GO:0006970|GO:0009266|GO:0046906|GO:0043169|GO:0009409|GO:0005737|GO:0071669|GO:0005783|GO:0009415|GO:0009414|GO:0071555|GO:0009505|GO:0006972|GO:0009664|GO:0046872|GO:0009269|GO:0009651|GO:0020037|GO:0042538	extracellular region|cell|cell junction|antioxidant activity|response to stimulus|catalytic activity|oxidoreductase activity|peroxidase activity|response to stress|cell wall organization or biogenesis|intracellular|plasmodesma|cell periphery|cell-cell junction|endomembrane system|cell wall|intracellular membrane-bounded organelle|response to osmotic stress|response to temperature stimulus|tetrapy…	-	-	ko01100|ko01110|ko00940	Metabolic pathways|Biosynthesis of secondary metabolites|Phenylpropanoid biosynthesis	chr4:20997297-20999061	6.22890068479496	6.24533930509168	3.73511980506163
107417060	LOC107417060	peroxidase 3-like	GO:0005576|GO:0005623|GO:0030054|GO:0016209|GO:0050896|GO:0003824|GO:0016491|GO:0004601|GO:0006950|GO:0071554|GO:0005622|GO:0009506|GO:0071944|GO:0005911|GO:0012505|GO:0005618|GO:0043231|GO:0006970|GO:0009266|GO:0046906|GO:0043169|GO:0009409|GO:0005737|GO:0071669|GO:0005783|GO:0009415|GO:0009414|GO:0071555|GO:0009505|GO:0006972|GO:0009664|GO:0046872|GO:0009269|GO:0009651|GO:0020037|GO:0042538	extracellular region|cell|cell junction|antioxidant activity|response to stimulus|catalytic activity|oxidoreductase activity|peroxidase activity|response to stress|cell wall organization or biogenesis|intracellular|plasmodesma|cell periphery|cell-cell junction|endomembrane system|cell wall|intracellular membrane-bounded organelle|response to osmotic stress|response to temperature stimulus|tetrapy…	-	-	ko01100|ko01110|ko00940	Metabolic pathways|Biosynthesis of secondary metabolites|Phenylpropanoid biosynthesis	chr4:21225994-21227679	6.28743838765998	6.24135448023981	3.63762511032582
107419925	LOC107419925	peroxidase 18	GO:0005576|GO:0005623|GO:0030054|GO:0016209|GO:0050896|GO:0003824|GO:0016491|GO:0004601|GO:0006950|GO:0071554|GO:0009506|GO:0071944|GO:0005911|GO:0005618|GO:0071669|GO:0071555|GO:0009505|GO:0009664	extracellular region|cell|cell junction|antioxidant activity|response to stimulus|catalytic activity|oxidoreductase activity|peroxidase activity|response to stress|cell wall organization or biogenesis|plasmodesma|cell periphery|cell-cell junction|cell wall|plant-type cell wall organization or biogenesis|cell wall organization|plant-type cell wall|plant-type cell wall organization	-	-	ko01100|ko01110|ko00940	Metabolic pathways|Biosynthesis of secondary metabolites|Phenylpropanoid biosynthesis	chr6:876454-878684	-2.33890782448922	2.00815193440859	0.0236684497817958
107421837	LOC107421837	probable peroxidase 26	GO:0005576|GO:0005623|GO:0030054|GO:0016209|GO:0050896|GO:0003824|GO:0016491|GO:0004601|GO:0006950|GO:0071554|GO:0009506|GO:0071944|GO:0005911|GO:0005618|GO:0071669|GO:0071555|GO:0009505|GO:0009664	extracellular region|cell|cell junction|antioxidant activity|response to stimulus|catalytic activity|oxidoreductase activity|peroxidase activity|response to stress|cell wall organization or biogenesis|plasmodesma|cell periphery|cell-cell junction|cell wall|plant-type cell wall organization or biogenesis|cell wall organization|plant-type cell wall|plant-type cell wall organization	-	-	ko01100|ko01110|ko00940	Metabolic pathways|Biosynthesis of secondary metabolites|Phenylpropanoid biosynthesis	chr7:808518-810692	5.0651162893942	4.49994213426428	0.346333867381604
107424697	LOC107424697	peroxidase 10-like	GO:0005576|GO:0016209|GO:0050896|GO:0008152|GO:0003824|GO:0016491|GO:0004601|GO:0006950|GO:0044237|GO:0046906|GO:0006979|GO:0043169|GO:0042744|GO:0055114|GO:0072593|GO:0042743|GO:0046872|GO:0020037	extracellular region|antioxidant activity|response to stimulus|metabolic process|catalytic activity|oxidoreductase activity|peroxidase activity|response to stress|cellular metabolic process|tetrapyrrole binding|response to oxidative stress|cation binding|hydrogen peroxide catabolic process|oxidation-reduction process|reactive oxygen species metabolic process|hydrogen peroxide metabolic process|me…	-	-	ko01100|ko01110|ko00940	Metabolic pathways|Biosynthesis of secondary metabolites|Phenylpropanoid biosynthesis	chr8:8286796-8288250	5.15869180159859	4.87019159109798	2.89154752774941
107426188	LOC107426188	peroxidase 5-like	GO:0048511|GO:0008152|GO:0044237|GO:0042752|GO:0009058|GO:0006807|GO:0007623|GO:0044238|GO:0032922|GO:0019538|GO:0097167|GO:0006518|GO:0051246|GO:0010467|GO:0044267|GO:0010468|GO:0043043|GO:0006412|GO:0010608|GO:0006417	rhythmic process|metabolic process|cellular metabolic process|regulation of circadian rhythm|biosynthetic process|nitrogen compound metabolic process|circadian rhythm|primary metabolic process|circadian regulation of gene expression|protein metabolic process|circadian regulation of translation|peptide metabolic process|regulation of protein metabolic process|gene expression|cellular protein metab…	-	-	ko01100|ko01110|ko00940	Metabolic pathways|Biosynthesis of secondary metabolites|Phenylpropanoid biosynthesis	chr9:3787327-3788692	0.53487791245815	4.63059100127859	2.47802024267693
107427938	LOC107427938	peroxidase 55-like	-	-	-	-	-	-	chr9:24612512-24614626	3.41618864654608	3.23862186584497	1.08114210524498
107429673	LOC107429673	lignin-forming anionic peroxidase-like	GO:0005576|GO:0016209|GO:0050896|GO:0008152|GO:0003824|GO:0016491|GO:0004601|GO:0006950|GO:0051716|GO:0070482|GO:0001666|GO:0046906|GO:0006979|GO:0043169|GO:0070887|GO:0055114|GO:0046872|GO:0071456|GO:0020037	extracellular region|antioxidant activity|response to stimulus|metabolic process|catalytic activity|oxidoreductase activity|peroxidase activity|response to stress|cellular response to stimulus|response to oxygen levels|response to hypoxia|tetrapyrrole binding|response to oxidative stress|cation binding|cellular response to chemical stimulus|oxidation-reduction process|metal ion binding|cellular r…	-	-	ko01100|ko01110|ko00940	Metabolic pathways|Biosynthesis of secondary metabolites|Phenylpropanoid biosynthesis	chr10:20197170-20198386	-4.36523742100235	0.599254008072556	0.284301620361847
107429740	LOC107429740	lignin-forming anionic peroxidase-like	GO:0005576|GO:0016209|GO:0050896|GO:0008152|GO:0003824|GO:0016491|GO:0004601|GO:0006950|GO:0051716|GO:0044237|GO:0070482|GO:0001666|GO:0046906|GO:0006979|GO:0043169|GO:0070887|GO:0042744|GO:0055114|GO:0072593|GO:0042743|GO:0046872|GO:0071456|GO:0020037	extracellular region|antioxidant activity|response to stimulus|metabolic process|catalytic activity|oxidoreductase activity|peroxidase activity|response to stress|cellular response to stimulus|cellular metabolic process|response to oxygen levels|response to hypoxia|tetrapyrrole binding|response to oxidative stress|cation binding|cellular response to chemical stimulus|hydrogen peroxide catabolic p…	-	-	ko01100|ko01110|ko00940	Metabolic pathways|Biosynthesis of secondary metabolites|Phenylpropanoid biosynthesis	chr10:20927429-20928834	-1.46328735606421	2.09408880640566	2.60821072313241
107431496	LOC107431496	peroxidase 24-like	GO:0005576|GO:0005623|GO:0030054|GO:0016209|GO:0050896|GO:0003824|GO:0016491|GO:0004601|GO:0006950|GO:0071554|GO:0009506|GO:0071944|GO:0005911|GO:0005618|GO:0071669|GO:0071555|GO:0009505|GO:0009664	extracellular region|cell|cell junction|antioxidant activity|response to stimulus|catalytic activity|oxidoreductase activity|peroxidase activity|response to stress|cell wall organization or biogenesis|plasmodesma|cell periphery|cell-cell junction|cell wall|plant-type cell wall organization or biogenesis|cell wall organization|plant-type cell wall|plant-type cell wall organization	-	-	ko01100|ko01110|ko00940	Metabolic pathways|Biosynthesis of secondary metabolites|Phenylpropanoid biosynthesis	chr11:20268671-20270392	5.96327188730278	5.46246461677468	-0.247383394275086
107434142	LOC107434142	peroxidase P7-like	GO:0032502|GO:0005576|GO:0005623|GO:0016209|GO:0008152|GO:0003824|GO:0016491|GO:0004601|GO:0005622|GO:0044237|GO:0071944|GO:0009058|GO:0012505|GO:0048046|GO:0005515|GO:0005618|GO:0043231|GO:0046906|GO:0043169|GO:0006725|GO:0005737|GO:0019748|GO:0005794|GO:0009698|GO:0009808|GO:0005829|GO:0019438|GO:2000762|GO:0009699|GO:0044550|GO:0046872|GO:0010087|GO:0020037|GO:0009809|GO:0010089|GO:1901430|GO:…	developmental process|extracellular region|cell|antioxidant activity|metabolic process|catalytic activity|oxidoreductase activity|peroxidase activity|intracellular|cellular metabolic process|cell periphery|biosynthetic process|endomembrane system|apoplast|protein binding|cell wall|intracellular membrane-bounded organelle|tetrapyrrole binding|cation binding|cellular aromatic compound metabolic pro…	-	-	ko01100|ko01110|ko00940	Metabolic pathways|Biosynthesis of secondary metabolites|Phenylpropanoid biosynthesis	NW_015453430.1:207177-209819	5.30215283991387	5.55738718151912	7.57928747850706
107435790	LOC107435790	lignin-forming anionic peroxidase-like	GO:0005576|GO:0016209|GO:0050896|GO:0008152|GO:0003824|GO:0016491|GO:0004601|GO:0006950|GO:0051716|GO:0070482|GO:0001666|GO:0046906|GO:0006979|GO:0043169|GO:0070887|GO:0055114|GO:0046872|GO:0071456|GO:0020037	extracellular region|antioxidant activity|response to stimulus|metabolic process|catalytic activity|oxidoreductase activity|peroxidase activity|response to stress|cellular response to stimulus|response to oxygen levels|response to hypoxia|tetrapyrrole binding|response to oxidative stress|cation binding|cellular response to chemical stimulus|oxidation-reduction process|metal ion binding|cellular r…	-	-	ko01100|ko01110|ko00940	Metabolic pathways|Biosynthesis of secondary metabolites|Phenylpropanoid biosynthesis	NW_015453566.1:147644-148857	0.530694746745033	0.712217773495602	-3.99679001125411
107435792	LOC107435792	lignin-forming anionic peroxidase-like	GO:0005576|GO:0016209|GO:0050896|GO:0008152|GO:0003824|GO:0016491|GO:0004601|GO:0006950|GO:0051716|GO:0070482|GO:0001666|GO:0046906|GO:0006979|GO:0043169|GO:0070887|GO:0055114|GO:0046872|GO:0071456|GO:0020037	extracellular region|antioxidant activity|response to stimulus|metabolic process|catalytic activity|oxidoreductase activity|peroxidase activity|response to stress|cellular response to stimulus|response to oxygen levels|response to hypoxia|tetrapyrrole binding|response to oxidative stress|cation binding|cellular response to chemical stimulus|oxidation-reduction process|metal ion binding|cellular r…	-	-	ko01100|ko01110|ko00940	Metabolic pathways|Biosynthesis of secondary metabolites|Phenylpropanoid biosynthesis	NW_015453566.1:137011-138298	-1.13392508843964	1.15343169720645	1.45944884914707
107435998	LOC107435998	peroxidase 3-like	GO:0005576|GO:0005623|GO:0030054|GO:0016209|GO:0050896|GO:0003824|GO:0016491|GO:0004601|GO:0006950|GO:0071554|GO:0005622|GO:0009506|GO:0071944|GO:0005911|GO:0012505|GO:0005618|GO:0043231|GO:0006970|GO:0009266|GO:0046906|GO:0043169|GO:0009409|GO:0005737|GO:0071669|GO:0005783|GO:0009415|GO:0009414|GO:0071555|GO:0009505|GO:0006972|GO:0009664|GO:0046872|GO:0009269|GO:0009651|GO:0020037|GO:0042538	extracellular region|cell|cell junction|antioxidant activity|response to stimulus|catalytic activity|oxidoreductase activity|peroxidase activity|response to stress|cell wall organization or biogenesis|intracellular|plasmodesma|cell periphery|cell-cell junction|endomembrane system|cell wall|intracellular membrane-bounded organelle|response to osmotic stress|response to temperature stimulus|tetrapy…	-	-	ko01100|ko01110|ko00940	Metabolic pathways|Biosynthesis of secondary metabolites|Phenylpropanoid biosynthesis	NW_015453587.1:124902-126689	6.67085395830686	6.13082876255797	0.982529578706458
107405508	LOC107405508	glutathione S-transferase U9-like	GO:0005623|GO:0008152|GO:0003824|GO:0016740|GO:0005622|GO:0044237|GO:0006807|GO:0043231|GO:0005737|GO:0016765|GO:0006790|GO:0019748|GO:0006518|GO:0005634|GO:0006749|GO:0009407|GO:0004364	cell|metabolic process|catalytic activity|transferase activity|intracellular|cellular metabolic process|nitrogen compound metabolic process|intracellular membrane-bounded organelle|cytoplasm|transferase activity, transferring alkyl or aryl (other than methyl) groups|sulfur compound metabolic process|secondary metabolic process|peptide metabolic process|nucleus|glutathione metabolic process|toxin …	-	-	ko00480|ko01524|ko00982|ko00980	Glutathione metabolism|Platinum drug resistance|Drug metabolism - cytochrome P450|Metabolism of xenobiotics by cytochrome P450	NW_015453952.1:26925-27617	3.86383086218596	4.06009081337954	7.00503307847347
107405514	LOC107405514	glutathione S-transferase U9-like	GO:0005623|GO:0008152|GO:0003824|GO:0016740|GO:0005622|GO:0044237|GO:0006807|GO:0043231|GO:0005737|GO:0016765|GO:0006790|GO:0019748|GO:0006518|GO:0005634|GO:0006749|GO:0009407|GO:0004364	cell|metabolic process|catalytic activity|transferase activity|intracellular|cellular metabolic process|nitrogen compound metabolic process|intracellular membrane-bounded organelle|cytoplasm|transferase activity, transferring alkyl or aryl (other than methyl) groups|sulfur compound metabolic process|secondary metabolic process|peptide metabolic process|nucleus|glutathione metabolic process|toxin …	-	-	ko00480|ko01524|ko00982|ko00980	Glutathione metabolism|Platinum drug resistance|Drug metabolism - cytochrome P450|Metabolism of xenobiotics by cytochrome P450	NW_015453952.1:24229-25901	3.07148086057773	4.4217915774894	6.18996034772362
107405515	LOC107405515	glutathione S-transferase U10-like	GO:0005623|GO:0008152|GO:0003824|GO:0016740|GO:0005622|GO:0044237|GO:0006807|GO:0005737|GO:0016765|GO:0006790|GO:0019748|GO:0006518|GO:0006749|GO:0009407|GO:0004364	cell|metabolic process|catalytic activity|transferase activity|intracellular|cellular metabolic process|nitrogen compound metabolic process|cytoplasm|transferase activity, transferring alkyl or aryl (other than methyl) groups|sulfur compound metabolic process|secondary metabolic process|peptide metabolic process|glutathione metabolic process|toxin catabolic process|glutathione transferase activity	-	-	ko00480|ko01524|ko00982|ko00980	Glutathione metabolism|Platinum drug resistance|Drug metabolism - cytochrome P450|Metabolism of xenobiotics by cytochrome P450	NW_015453952.1:12019-13725	3.13216545397521	3.93377636661408	5.86155075940728
107405982	LOC107405982	probable glutathione S-transferase	GO:0005623|GO:0050896|GO:0008152|GO:0003824|GO:0016740|GO:0005622|GO:0044237|GO:0006807|GO:0005737|GO:0016765|GO:0006790|GO:0019748|GO:0006518|GO:0006749|GO:0009407|GO:0010038|GO:0004364|GO:0046686	cell|response to stimulus|metabolic process|catalytic activity|transferase activity|intracellular|cellular metabolic process|nitrogen compound metabolic process|cytoplasm|transferase activity, transferring alkyl or aryl (other than methyl) groups|sulfur compound metabolic process|secondary metabolic process|peptide metabolic process|glutathione metabolic process|toxin catabolic process|response t…	-	-	ko00480|ko01524|ko00982|ko00980	Glutathione metabolism|Platinum drug resistance|Drug metabolism - cytochrome P450|Metabolism of xenobiotics by cytochrome P450	NW_015454063.1:19426-20241	3.97171855144859	5.33714156991998	6.79116170561135
107405983	LOC107405983	probable glutathione S-transferase	GO:0005623|GO:0050896|GO:0008152|GO:0003824|GO:0016740|GO:0005622|GO:0044237|GO:0006807|GO:0005737|GO:0016765|GO:0006790|GO:0019748|GO:0006518|GO:0006749|GO:0009407|GO:0010038|GO:0004364|GO:0046686	cell|response to stimulus|metabolic process|catalytic activity|transferase activity|intracellular|cellular metabolic process|nitrogen compound metabolic process|cytoplasm|transferase activity, transferring alkyl or aryl (other than methyl) groups|sulfur compound metabolic process|secondary metabolic process|peptide metabolic process|glutathione metabolic process|toxin catabolic process|response t…	-	-	ko00480|ko01524|ko00982|ko00980	Glutathione metabolism|Platinum drug resistance|Drug metabolism - cytochrome P450|Metabolism of xenobiotics by cytochrome P450	NW_015454063.1:15916-17253	3.53973093698439	3.91331473877361	1.00866962242745
107409956	LOC107409956	glutathione S-transferase U9-like	GO:0005623|GO:0008152|GO:0003824|GO:0016740|GO:0005622|GO:0044237|GO:0006807|GO:0043231|GO:0005737|GO:0016765|GO:0006790|GO:0019748|GO:0006518|GO:0005634|GO:0006749|GO:0009407|GO:0004364	cell|metabolic process|catalytic activity|transferase activity|intracellular|cellular metabolic process|nitrogen compound metabolic process|intracellular membrane-bounded organelle|cytoplasm|transferase activity, transferring alkyl or aryl (other than methyl) groups|sulfur compound metabolic process|secondary metabolic process|peptide metabolic process|nucleus|glutathione metabolic process|toxin …	-	-	ko00480|ko01524|ko00982|ko00980	Glutathione metabolism|Platinum drug resistance|Drug metabolism - cytochrome P450|Metabolism of xenobiotics by cytochrome P450	NW_015457718.1:417-1523	9.25045080500565	10.2510194527517	11.5526382268486
107419266	LOC107419266	glutathione S-transferase U9-like	-	-	-	-	-	-	chr5:25771357-25819285	-3.98045133632314	-3.08847096950219	3.25858552045925
107422605	LOC107422605	glutathione S-transferase U7-like	GO:0005623|GO:0050896|GO:0008152|GO:0003824|GO:0016740|GO:0005622|GO:0044237|GO:0006807|GO:0005737|GO:0016765|GO:0006790|GO:0019748|GO:0006518|GO:0005829|GO:0006749|GO:0009407|GO:0009751|GO:0004364	cell|response to stimulus|metabolic process|catalytic activity|transferase activity|intracellular|cellular metabolic process|nitrogen compound metabolic process|cytoplasm|transferase activity, transferring alkyl or aryl (other than methyl) groups|sulfur compound metabolic process|secondary metabolic process|peptide metabolic process|cytosol|glutathione metabolic process|toxin catabolic process|re…	-	-	ko00480|ko01524|ko00982|ko00980	Glutathione metabolism|Platinum drug resistance|Drug metabolism - cytochrome P450|Metabolism of xenobiotics by cytochrome P450	chr7:14787341-14788677	2.12410003085317	5.39094044688702	4.98796891561858
107422872	LOC107422872	probable glutathione S-transferase	GO:0005623|GO:0050896|GO:0008152|GO:0003824|GO:0016740|GO:0005622|GO:0044237|GO:0006807|GO:0005737|GO:0016765|GO:0006790|GO:0019748|GO:0006518|GO:0006749|GO:0009407|GO:0010038|GO:0004364|GO:0046686	cell|response to stimulus|metabolic process|catalytic activity|transferase activity|intracellular|cellular metabolic process|nitrogen compound metabolic process|cytoplasm|transferase activity, transferring alkyl or aryl (other than methyl) groups|sulfur compound metabolic process|secondary metabolic process|peptide metabolic process|glutathione metabolic process|toxin catabolic process|response t…	-	-	ko00480|ko01524|ko00982|ko00980	Glutathione metabolism|Platinum drug resistance|Drug metabolism - cytochrome P450|Metabolism of xenobiotics by cytochrome P450	chr7:18192118-18193753	0.643186590256961	-0.202224378133852	4.95917135856539
107423369	LOC107423369	probable glutathione S-transferase	GO:0016020|GO:0005623|GO:0050896|GO:0008152|GO:0003824|GO:0031090|GO:0016740|GO:0006950|GO:0051716|GO:0005622|GO:0044237|GO:0071944|GO:0006807|GO:0012505|GO:0005886|GO:0098588|GO:0042277|GO:0043231|GO:0006979|GO:0005737|GO:0016765|GO:0070887|GO:0006790|GO:0019748|GO:0043295|GO:0009415|GO:0009414|GO:0007154|GO:0005774|GO:0005794|GO:0006518|GO:0005829|GO:0006749|GO:0005773|GO:0009532|GO:0009407|GO:…	membrane|cell|response to stimulus|metabolic process|catalytic activity|organelle membrane|transferase activity|response to stress|cellular response to stimulus|intracellular|cellular metabolic process|cell periphery|nitrogen compound metabolic process|endomembrane system|plasma membrane|bounding membrane of organelle|peptide binding|intracellular membrane-bounded organelle|response to oxidative …	-	-	ko00480|ko01524|ko00982|ko00980	Glutathione metabolism|Platinum drug resistance|Drug metabolism - cytochrome P450|Metabolism of xenobiotics by cytochrome P450	chr7:24545879-24547585	4.18776288230176	3.77471939261356	1.64740505834069
107423451	LOC107423451	probable glutathione S-transferase	GO:0005623|GO:0008152|GO:0003824|GO:0016740|GO:0005622|GO:0044237|GO:0006807|GO:0006725|GO:0005737|GO:0016765|GO:0006790|GO:0019748|GO:0006518|GO:0019439|GO:0006749|GO:0009407|GO:0004364|GO:0046256	cell|metabolic process|catalytic activity|transferase activity|intracellular|cellular metabolic process|nitrogen compound metabolic process|cellular aromatic compound metabolic process|cytoplasm|transferase activity, transferring alkyl or aryl (other than methyl) groups|sulfur compound metabolic process|secondary metabolic process|peptide metabolic process|aromatic compound catabolic process|glut…	-	-	ko00480|ko01524|ko00982|ko00980	Glutathione metabolism|Platinum drug resistance|Drug metabolism - cytochrome P450|Metabolism of xenobiotics by cytochrome P450	chr7:26003296-26006370	1.61203105963424	2.12199498857466	-3.40531420439331
107426258	LOC107426258	glutathione S-transferase F13	GO:0005623|GO:0008152|GO:0003824|GO:0016740|GO:0005622|GO:0044237|GO:0006807|GO:0005737|GO:0016765|GO:0006790|GO:0019748|GO:0006518|GO:0006749|GO:0009407|GO:0004364	cell|metabolic process|catalytic activity|transferase activity|intracellular|cellular metabolic process|nitrogen compound metabolic process|cytoplasm|transferase activity, transferring alkyl or aryl (other than methyl) groups|sulfur compound metabolic process|secondary metabolic process|peptide metabolic process|glutathione metabolic process|toxin catabolic process|glutathione transferase activity	-	-	ko00480|ko01524|ko00982|ko00980	Glutathione metabolism|Platinum drug resistance|Drug metabolism - cytochrome P450|Metabolism of xenobiotics by cytochrome P450	chr9:4714497-4716965	4.89393208228883	4.4946847148354	-2.08646592730925
107426457	LOC107426457	glutathione transferase GST 23-like	GO:0005623|GO:0050896|GO:0008152|GO:0003824|GO:0016740|GO:0005622|GO:0044237|GO:0006807|GO:0005737|GO:0016765|GO:0006790|GO:0019748|GO:0006518|GO:0005829|GO:0006749|GO:0009407|GO:0009751|GO:0004364	cell|response to stimulus|metabolic process|catalytic activity|transferase activity|intracellular|cellular metabolic process|nitrogen compound metabolic process|cytoplasm|transferase activity, transferring alkyl or aryl (other than methyl) groups|sulfur compound metabolic process|secondary metabolic process|peptide metabolic process|cytosol|glutathione metabolic process|toxin catabolic process|re…	-	-	ko00480|ko01524|ko00982|ko00980	Glutathione metabolism|Platinum drug resistance|Drug metabolism - cytochrome P450|Metabolism of xenobiotics by cytochrome P450	chr9:5461724-5463112	1.8999126929373	4.97004052953141	4.93217916657338
107428781	LOC107428781	glutathione S-transferase U17-like	GO:0032502|GO:0005623|GO:0040007|GO:0050896|GO:0008152|GO:0003824|GO:0016740|GO:0006950|GO:0005622|GO:0044237|GO:0040008|GO:0006807|GO:0009725|GO:0080148|GO:0009791|GO:0043231|GO:0006970|GO:0007275|GO:0048569|GO:0080167|GO:0005737|GO:0016765|GO:0006790|GO:0019748|GO:0009415|GO:0009414|GO:0009314|GO:0048364|GO:0048513|GO:0009636|GO:0006518|GO:0005829|GO:0009640|GO:0006749|GO:0009416|GO:2000070|GO:…	developmental process|cell|growth|response to stimulus|metabolic process|catalytic activity|transferase activity|response to stress|intracellular|cellular metabolic process|regulation of growth|nitrogen compound metabolic process|response to hormone|negative regulation of response to water deprivation|post-embryonic development|intracellular membrane-bounded organelle|response to osmotic stress|m…	-	-	ko00480|ko01524|ko00982|ko00980	Glutathione metabolism|Platinum drug resistance|Drug metabolism - cytochrome P450|Metabolism of xenobiotics by cytochrome P450	chr10:7601443-7602000	2.46213493146549	3.08717612352585	4.66642697772687
107430668	LOC107430668	probable glutathione S-transferase	GO:0005623|GO:0050896|GO:0008152|GO:0003824|GO:0016740|GO:0005622|GO:0044237|GO:0006807|GO:0005737|GO:0016765|GO:0006790|GO:0019748|GO:0006518|GO:0006749|GO:0009407|GO:0010038|GO:0004364|GO:0046686	cell|response to stimulus|metabolic process|catalytic activity|transferase activity|intracellular|cellular metabolic process|nitrogen compound metabolic process|cytoplasm|transferase activity, transferring alkyl or aryl (other than methyl) groups|sulfur compound metabolic process|secondary metabolic process|peptide metabolic process|glutathione metabolic process|toxin catabolic process|response t…	-	-	ko00480|ko01524|ko00982|ko00980	Glutathione metabolism|Platinum drug resistance|Drug metabolism - cytochrome P450|Metabolism of xenobiotics by cytochrome P450	chr11:12028342-12029481	1.12746619350653	3.2825619248928	5.18837124131791
107430677	LOC107430677	probable glutathione S-transferase	GO:0005623|GO:0050896|GO:0008152|GO:0003824|GO:0016740|GO:0005622|GO:0044237|GO:0006807|GO:0005737|GO:0016765|GO:0006790|GO:0019748|GO:0006518|GO:0006749|GO:0009407|GO:0010038|GO:0004364|GO:0046686	cell|response to stimulus|metabolic process|catalytic activity|transferase activity|intracellular|cellular metabolic process|nitrogen compound metabolic process|cytoplasm|transferase activity, transferring alkyl or aryl (other than methyl) groups|sulfur compound metabolic process|secondary metabolic process|peptide metabolic process|glutathione metabolic process|toxin catabolic process|response t…	-	-	ko00480|ko01524|ko00982|ko00980	Glutathione metabolism|Platinum drug resistance|Drug metabolism - cytochrome P450|Metabolism of xenobiotics by cytochrome P450	chr11:12031538-12032919	4.73746061647374	5.44145736129447	7.31214127623862
107430679	LOC107430679	probable glutathione S-transferase	GO:0005623|GO:0050896|GO:0008152|GO:0003824|GO:0016740|GO:0005622|GO:0044237|GO:0006807|GO:0005737|GO:0016765|GO:0006790|GO:0019748|GO:0006518|GO:0006749|GO:0009407|GO:0010038|GO:0004364|GO:0046686	cell|response to stimulus|metabolic process|catalytic activity|transferase activity|intracellular|cellular metabolic process|nitrogen compound metabolic process|cytoplasm|transferase activity, transferring alkyl or aryl (other than methyl) groups|sulfur compound metabolic process|secondary metabolic process|peptide metabolic process|glutathione metabolic process|toxin catabolic process|response t…	-	-	ko00480|ko01524|ko00982|ko00980	Glutathione metabolism|Platinum drug resistance|Drug metabolism - cytochrome P450|Metabolism of xenobiotics by cytochrome P450	chr11:12005912-12007179	6.67639419573562	6.70857428897069	9.5238549872002
107430680	LOC107430680	probable glutathione S-transferase	-	-	-	-	-	-	chr11:12002568-12003972	4.97233441784161	4.63254363117149	7.22626130980474
107430681	LOC107430681	probable glutathione S-transferase	GO:0005623|GO:0050896|GO:0008152|GO:0003824|GO:0016740|GO:0005622|GO:0044237|GO:0006807|GO:0005737|GO:0016765|GO:0006790|GO:0019748|GO:0006518|GO:0006749|GO:0009407|GO:0010038|GO:0004364|GO:0046686	cell|response to stimulus|metabolic process|catalytic activity|transferase activity|intracellular|cellular metabolic process|nitrogen compound metabolic process|cytoplasm|transferase activity, transferring alkyl or aryl (other than methyl) groups|sulfur compound metabolic process|secondary metabolic process|peptide metabolic process|glutathione metabolic process|toxin catabolic process|response t…	-	-	ko00480|ko01524|ko00982|ko00980	Glutathione metabolism|Platinum drug resistance|Drug metabolism - cytochrome P450|Metabolism of xenobiotics by cytochrome P450	chr11:12038397-12039856	5.58373687201046	5.77898204281232	7.79445120019844
107433279	LOC107433279	glutathione S-transferase F13-like	GO:0005623|GO:0008152|GO:0003824|GO:0016740|GO:0005622|GO:0044237|GO:0006807|GO:0005737|GO:0016765|GO:0006790|GO:0019748|GO:0006518|GO:0006749|GO:0009407|GO:0004364	cell|metabolic process|catalytic activity|transferase activity|intracellular|cellular metabolic process|nitrogen compound metabolic process|cytoplasm|transferase activity, transferring alkyl or aryl (other than methyl) groups|sulfur compound metabolic process|secondary metabolic process|peptide metabolic process|glutathione metabolic process|toxin catabolic process|glutathione transferase activity	-	-	ko00480|ko01524|ko00982|ko00980	Glutathione metabolism|Platinum drug resistance|Drug metabolism - cytochrome P450|Metabolism of xenobiotics by cytochrome P450	chr12:17894097-17895509	-1.84815254581966	2.69982747636773	1.21280678918491
107403792	LOC107403792	alcohol dehydrogenase-like 4	GO:0005623|GO:0008152|GO:0003824|GO:0016491|GO:0005622|GO:0016614|GO:0043169|GO:0005737|GO:0055114|GO:0016616|GO:0046872|GO:0004022|GO:0046914|GO:0008270	cell|metabolic process|catalytic activity|oxidoreductase activity|intracellular|oxidoreductase activity, acting on CH-OH group of donors|cation binding|cytoplasm|oxidation-reduction process|oxidoreductase activity, acting on the CH-OH group of donors, NAD or NADP as acceptor|metal ion binding|alcohol dehydrogenase (NAD) activity|transition metal ion binding|zinc ion binding	-	-	ko01100|ko01110|ko01130|ko01120|ko01200|ko00010|ko00350|ko00680|ko00982|ko00980	Metabolic pathways|Biosynthesis of secondary metabolites|Biosynthesis of antibiotics|Microbial metabolism in diverse environments|Carbon metabolism|Glycolysis / Gluconeogenesis|Tyrosine metabolism|Methane metabolism|Drug metabolism - cytochrome P450|Metabolism of xenobiotics by cytochrome P450	NW_015453649.1:87781-89745	3.18580916090295	2.99851464151983	-0.341471956723037
107415195	LOC107415195	alcohol dehydrogenase 1	GO:0016020|GO:0005623|GO:0050896|GO:0008152|GO:0003824|GO:0016491|GO:0006950|GO:0005622|GO:0044237|GO:0071944|GO:0012505|GO:0005886|GO:0070482|GO:0016614|GO:0001666|GO:0043231|GO:0006970|GO:0043169|GO:0006091|GO:0005737|GO:0055114|GO:0005794|GO:0005829|GO:0016616|GO:0046872|GO:0045333|GO:0010038|GO:0009651|GO:0046686|GO:0004022|GO:0046914|GO:0008270	membrane|cell|response to stimulus|metabolic process|catalytic activity|oxidoreductase activity|response to stress|intracellular|cellular metabolic process|cell periphery|endomembrane system|plasma membrane|response to oxygen levels|oxidoreductase activity, acting on CH-OH group of donors|response to hypoxia|intracellular membrane-bounded organelle|response to osmotic stress|cation binding|genera…	-	-	ko01100|ko01110|ko01120|ko00010|ko00350|ko00592|ko00071	Metabolic pathways|Biosynthesis of secondary metabolites|Microbial metabolism in diverse environments|Glycolysis / Gluconeogenesis|Tyrosine metabolism|alpha-Linolenic acid metabolism|Fatty acid degradation	chr4:1471018-1474007	6.36990724180318	6.47429469440969	3.12210170299296
107415535	LOC107415535	polyvinylalcohol dehydrogenase-like	GO:0009055|GO:0003824|GO:0016491|GO:0048037|GO:0046906|GO:0043169|GO:0070968|GO:0043177|GO:0048038|GO:0031406|GO:0046872|GO:0020037|GO:0005509	electron carrier activity|catalytic activity|oxidoreductase activity|cofactor binding|tetrapyrrole binding|cation binding|pyrroloquinoline quinone binding|organic acid binding|quinone binding|carboxylic acid binding|metal ion binding|heme binding|calcium ion binding	-	-	-	-	chr4:4663314-4666566	5.64828296119898	5.78458307280087	3.59655378564087
107421622	LOC107421622	alcohol dehydrogenase 1-like	-	-	-	-	-	-	chr6:23644175-23646823	9.04803286886974	9.06849782213618	3.7510936800331
107428187	LOC107428187	probable cinnamyl alcohol dehydrogenase 1	GO:0005623|GO:0008152|GO:0003824|GO:0016491|GO:0005622|GO:0044237|GO:0009058|GO:0016614|GO:0043169|GO:0006725|GO:0005737|GO:0019748|GO:0009698|GO:0009808|GO:0005829|GO:0019438|GO:0009699|GO:0044550|GO:0016616|GO:0046872|GO:0009809|GO:0052747|GO:0045551|GO:0046914|GO:0008270	cell|metabolic process|catalytic activity|oxidoreductase activity|intracellular|cellular metabolic process|biosynthetic process|oxidoreductase activity, acting on CH-OH group of donors|cation binding|cellular aromatic compound metabolic process|cytoplasm|secondary metabolic process|phenylpropanoid metabolic process|lignin metabolic process|cytosol|aromatic compound biosynthetic process|phenylprop…	-	-	ko01100|ko01110|ko00940	Metabolic pathways|Biosynthesis of secondary metabolites|Phenylpropanoid biosynthesis	chr10:1727232-1729314	-0.176946373914529	0.887023356078777	2.11246761444629
107428835	LOC107428835	polyvinylalcohol dehydrogenase-like	GO:0009055|GO:0003824|GO:0016491|GO:0048037|GO:0046906|GO:0043169|GO:0070968|GO:0043177|GO:0048038|GO:0031406|GO:0046872|GO:0020037|GO:0005509	electron carrier activity|catalytic activity|oxidoreductase activity|cofactor binding|tetrapyrrole binding|cation binding|pyrroloquinoline quinone binding|organic acid binding|quinone binding|carboxylic acid binding|metal ion binding|heme binding|calcium ion binding	-	-	-	-	chr10:9142480-9145357	-4.82811529119309	-0.468017397648518	-4.51909238399137
107431809	LOC107431809	NADPH:adrenodoxin oxidoreductase, mitochondrial-like	GO:0016020|GO:0005623|GO:0009055|GO:0008152|GO:0003824|GO:0016491|GO:0005622|GO:0044237|GO:0048037|GO:0071944|GO:0009058|GO:0006807|GO:0005886|GO:0016730|GO:0022900|GO:0043231|GO:0044281|GO:0006091|GO:0005737|GO:0055114|GO:0006790|GO:0050662|GO:0000166|GO:0016731|GO:0050660|GO:0005739|GO:0006766|GO:0009102|GO:0019752|GO:0006767	membrane|cell|electron carrier activity|metabolic process|catalytic activity|oxidoreductase activity|intracellular|cellular metabolic process|cofactor binding|cell periphery|biosynthetic process|nitrogen compound metabolic process|plasma membrane|oxidoreductase activity, acting on iron-sulfur proteins as donors|electron transport chain|intracellular membrane-bounded organelle|small molecule metab…	-	-	-	-	chr12:2783289-2787401	0.943268223856047	1.25841569862175	-2.14247938775119
107418627	LOC107418627	NADH dehydrogenase [ubiquinone] iron-sulfur protein 2-like	GO:0005623|GO:0005622|GO:0043231|GO:0005737|GO:0005739	cell|intracellular|intracellular membrane-bounded organelle|cytoplasm|mitochondrion	-	-	ko01100|ko00190	Metabolic pathways|Oxidative phosphorylation	chr5:12949685-12956619	-1.24224807956655	0.0197455127054123	1.06476091050795
107414228	LOC107414228	aldo-keto reductase family 4 member C9	GO:0005623|GO:0008152|GO:0003824|GO:0016491|GO:0005622|GO:0005737|GO:0055114	cell|metabolic process|catalytic activity|oxidoreductase activity|intracellular|cytoplasm|oxidation-reduction process	-	-	-	-	chr3:20343731-20347095	2.12481251447695	1.23528483124892	-2.27601924537966
